# Supplementary material for: Shotgun Proteomics Identifies Active Metabolic Pathways in Bleached Coral Tissue and Intraskeletal Compartments
Source: Frontiers journal article supplement (doi:10.3389/fmars.2022.797517), 2022-02-14
Supplement: Data_Sheet_3.xlsx [file Data_Sheet_3.xlsx]

## Sheet: Qspec NB OL vs IC
Supplemental file 3: Qspec results for comparisons of non bleached outer layer vs non bleached inner core (NB OL vs IC); non bleached vs bleached outer layer (OL NB vs B); and non bleached vs bleached inner core (IC NB vs B).
OL Tissue = -LFC		IC Skeletal = +LFC			NB = Non-bleached		B = Bleached
	SeqName	Len	S0	S1	S0.1	S1.1	S0.2	S1.2	S0.3	S1.3	S0.4	S1.4	S0.5	S1.5	S0.6	S1.6	S0.7	S1.7	S0.8	S1.8	LogFoldChange	Zstatistic	fdr	FDRup	FDRdown
1	lcl|c129535_g1_i1|m.155	581	0	0	1	1	0	0	0	0	0	0	1	0	0	0	0	0	0	0	0.045	0.1052	1	0.632181	0.403729
2	lcl|c141061_g1_i1|m.229	205	0	0	1	0	0	0	0	0	0	0	2	2	0	0	1	0	0	0	0.133	0.3231	1	0.493081	0.517956
3	lcl|c143056_g1_i1|m.250	150	0	0	0	0	0	0	0	0	0	0	5	3	0	0	0	0	0	0	-0.046	-0.1242	0.965633	0.705936	0.236181
4	lcl|c145576_g1_i1|m.265	147	1	4	7	4	7	6	7	6	3	2	10	7	10	6	8	6	11	6	-0.12	-0.6409	0.199894	0.70173	0.01551
5	lcl|c157567_g1_i1|m.372	299	0	0	0	0	0	0	0	0	1	0	0	0	1	0	0	0	0	0	0.096	0.2239	1	0.565979	0.473131
6	lcl|c163027_g1_i3|m.422	260	3	1	3	1	3	0	3	1	3	0	1	0	2	3	1	0	2	0	-0.456	-1.3124	0.000405	0.625965	1.8e-05
7	lcl|c164490_g1_i1|m.440	278	23	14	33	18	36	13	32	12	30	12	23	15	18	19	28	15	27	15	-0.46	-4.0796	0	0.530611	0
8	lcl|c167783_g1_i1|m.480	134	1	0	1	1	2	0	0	1	1	1	2	1	1	0	1	2	1	1	0.055	0.1316	1	0.619348	0.420598
9	lcl|c169761_g1_i1|m.505	502	2	11	2	3	2	2	1	3	3	3	6	12	7	8	1	5	0	0	0.724	3.024	0	0	0.533939
10	lcl|c176627_g1_i2|m.576	287	0	1	0	0	10	6	0	0	1	0	4	2	0	0	0	3	0	0	-0.023	-0.0784	0.985144	0.696097	0.270684
11	lcl|c176630_g1_i1|m.578	375	0	1	0	0	0	0	0	0	1	0	0	1	0	0	0	2	0	0	0.125	0.2962	1	0.514429	0.506976
12	lcl|c177275_g1_i1|m.586	369	0	0	0	0	0	0	0	0	0	1	1	0	2	1	1	0	2	0	-0.119	-0.2894	0.799111	0.724021	0.125687
13	lcl|c177410_g1_i1|m.597	156	2	0	3	0	1	0	2	1	2	2	1	0	0	0	2	0	0	0	-0.235	-0.5884	0.271248	0.707877	0.022604
14	lcl|c182463_g1_i1|m.663	145	0	1	1	0	1	1	1	3	1	2	0	3	0	1	0	4	1	3	0.81	2.2079	0	0	0.551772
15	lcl|c184118_g1_i1|m.691	140	27	23	31	26	36	27	36	26	32	25	40	23	34	28	40	30	41	30	-0.117	-1.2842	0.000568	0.628347	2.5e-05
16	lcl|c187253_g2_i1|m.744	358	0	0	0	0	0	0	0	0	0	0	0	0	0	0	1	0	1	0	0.097	0.2193	1	0.568967	0.47076
17	lcl|c188047_g2_i2|m.760	688	1	0	4	3	3	0	1	1	2	0	1	0	2	2	2	0	1	2	-0.108	-0.3032	0.778084	0.724431	0.118029
18	lcl|c192621_g3_i1|m.866	226	0	0	0	2	0	0	1	1	0	0	0	0	0	0	0	1	1	1	0.216	0.4989	1	0.331557	0.570523
19	lcl|c194625_g1_i1|m.911	173	1	1	2	0	3	1	6	1	4	1	1	2	3	1	10	2	4	0	-0.881	-2.6803	0	0.553684	0
20	lcl|c195423_g1_i1|m.937	184	1	1	0	0	0	0	0	0	0	0	0	0	1	1	1	0	0	1	0.095	0.214	1	0.572364	0.467994
21	lcl|c195747_g2_i1|m.945	100	142	197	142	195	155	182	154	194	173	171	152	230	179	173	166	243	155	193	0.385	10.4944	0	0	0.511159
22	lcl|c197607_g1_i1|m.1006	109	0	0	0	0	0	0	0	0	0	0	0	0	0	0	0	0	1	1	0.101	0.2315	1	0.560968	0.476991
23	lcl|c198620_g1_i2|m.1049	143	2	3	4	5	4	2	3	6	3	0	4	3	2	1	3	3	2	2	0.101	0.3826	1	0.442052	0.539299
24	lcl|c198665_g3_i2|m.1050	232	0	0	2	1	1	0	1	0	2	1	1	1	2	0	1	1	0	0	-0.128	-0.3168	0.756443	0.724691	0.110766
25	lcl|c199545_g1_i1|m.1080	279	0	0	1	0	1	0	2	0	0	1	2	1	0	1	0	1	1	1	-0.065	-0.1504	0.949811	0.710567	0.216869
26	lcl|c199810_g1_i2|m.1089	141	0	1	0	0	0	1	0	2	0	0	1	4	2	3	1	1	3	3	0.457	1.2545	0.047768	0.002708	0.586251
27	lcl|c201141_g1_i1|m.1178	281	2	0	6	0	4	0	1	0	5	0	10	1	2	0	6	0	7	0	-1.292	-3.9439	0	0.532202	0
28	lcl|c201155_g1_i1|m.1182	295	5	6	15	10	10	7	12	8	11	7	6	6	6	3	9	6	7	2	-0.222	-1.2473	0.000872	0.631572	4e-05
29	lcl|c201157_g2_i3|m.1183	490	0	1	1	2	0	0	0	1	1	2	0	3	0	3	1	2	1	1	0.634	1.7417	0.000239	9e-06	0.567183
30	lcl|c201413_g4_i1|m.1201	149	1	0	2	2	1	1	3	0	0	1	6	1	1	1	2	2	2	1	-0.371	-1.0348	0.008212	0.652912	0.000454
31	lcl|c201441_g1_i1|m.1204	402	1	3	2	2	4	0	2	1	2	0	2	1	2	1	2	0	5	1	-0.425	-1.2256	0.001116	0.63353	5.2e-05
32	lcl|c201696_g3_i1|m.1219	152	1	2	5	3	3	3	4	1	1	0	4	1	2	2	3	1	5	0	-0.431	-1.3365	0.000302	0.623982	1.3e-05
33	lcl|c201793_g1_i1|m.1223	210	0	2	1	0	1	0	1	0	0	0	0	0	1	0	0	0	1	0	0.142	0.3621	1	0.460187	0.532389
34	lcl|c202129_g1_i1|m.1242	199	8	11	9	4	12	5	12	7	10	6	11	9	12	7	12	6	10	6	-0.286	-1.6939	2e-06	0.59838	0
35	lcl|c202472_g1_i1|m.1259	104	36	38	33	28	36	32	46	60	27	42	43	56	37	46	34	56	48	52	0.346	4.4499	0	0	0.520094
36	lcl|c202641_g1_i1|m.1266	196	3	1	5	1	4	3	4	4	3	1	5	6	6	5	8	8	6	3	-0.161	-0.6484	0.190848	0.700818	0.014671
37	lcl|c202763_g1_i3|m.1276	200	1	5	2	5	1	5	1	4	0	6	2	10	0	5	1	5	2	4	1.431	5.0945	0	0	0.517294
38	lcl|c202894_g5_i1|m.1285	234	4	12	0	0	1	3	4	10	3	8	0	2	2	7	0	5	0	2	1.097	4.1489	0	0	0.521793
39	lcl|c203039_g1_i1|m.1291	978	0	0	1	0	2	2	2	2	0	0	2	1	1	0	2	0	3	2	-0.088	-0.2456	0.858979	0.721678	0.151842
40	lcl|c203193_g1_i1|m.1308	228	5	6	9	5	11	7	17	8	11	8	8	8	6	7	12	10	11	4	-0.176	-1.0655	0.006071	0.649525	0.000327
41	lcl|c203483_g1_i2|m.1328	267	1	1	1	1	1	0	2	1	2	1	1	1	1	1	2	1	1	2	-0.071	-0.1769	0.929926	0.714539	0.197841
42	lcl|c203808_g1_i1|m.1339	277	0	0	0	1	0	1	0	0	0	0	0	0	0	0	1	0	1	0	0.078	0.1787	0.999969	0.593816	0.448698
43	lcl|c204019_g1_i1|m.1366	306	4	3	4	2	4	3	6	4	3	2	5	4	3	1	6	2	5	1	-0.434	-1.7032	2e-06	0.59778	0
44	lcl|c204019_g3_i1|m.1367	115	0	1	1	0	1	0	1	0	1	0	1	0	0	0	1	0	1	0	0.094	0.2048	1	0.578153	0.463113
45	lcl|c204436_g1_i1|m.1392	704	1	2	1	1	2	1	2	2	1	2	2	2	1	2	3	4	3	5	0.356	1.1373	0.118889	0.007899	0.591851
46	lcl|c204885_g2_i1|m.1407	274	0	0	0	0	0	0	3	2	1	0	3	1	1	0	1	1	0	0	-0.137	-0.3442	0.710345	0.724798	0.097006
47	lcl|c204986_g3_i2|m.1414	274	2	1	5	2	5	2	5	2	4	2	6	1	3	3	6	2	4	3	-0.625	-2.2366	0	0.568676	0
48	lcl|c205012_g1_i1|m.1420	449	0	1	0	1	0	2	0	1	1	0	0	0	1	0	0	0	1	0	0.197	0.4579	1	0.371534	0.560965
49	lcl|c205031_g3_i2|m.1422	388	0	1	0	0	1	1	0	1	0	1	0	0	0	0	0	0	3	1	-0.06	-0.1449	0.953415	0.709654	0.220887
50	lcl|c205358_g1_i2|m.1452	361	0	0	0	0	0	0	0	0	0	0	0	1	0	1	0	0	0	1	0.069	0.1546	1	0.60731	0.434648
51	lcl|c205488_g1_i1|m.1464	125	2	4	2	4	6	9	3	7	4	6	4	7	2	4	3	5	4	4	0.7	3.1364	0	0	0.531997
52	lcl|c205554_g2_i2|m.1468	125	0	1	2	0	1	0	0	0	1	0	1	0	1	1	1	0	2	0	-0.056	-0.1323	0.961112	0.707444	0.230166
53	lcl|c205697_g1_i1|m.1481	318	21	35	34	15	39	30	50	27	40	31	18	33	43	27	32	38	35	44	0.064	0.7803	0.707327	0.100418	0.601053
54	lcl|c205713_g1_i1|m.1484	352	6	51	8	43	22	41	24	51	21	71	19	69	26	66	16	85	23	66	1.363	16.2218	0	0	0.50964
55	lcl|c206182_g1_i1|m.1515	148	0	3	1	3	2	0	1	1	3	2	1	2	1	0	1	2	1	2	0.421	1.1569	0.103008	0.006657	0.590914
56	lcl|c206351_g3_i3|m.1527	261	0	2	2	0	0	0	0	1	0	1	0	0	0	2	0	0	1	0	0.178	0.4231	1	0.404769	0.55165
57	lcl|c206383_g2_i1|m.1532	476	1	0	0	0	1	0	0	0	0	0	1	0	0	0	0	0	0	0	0.062	0.1538	1	0.607743	0.43417
58	lcl|c206397_g1_i2|m.1536	116	0	0	0	0	0	0	0	2	0	0	0	0	0	0	0	1	0	0	0.22	0.5301	0.993648	0.301041	0.576834
59	lcl|c206417_g1_i2|m.1538	404	0	0	6	0	6	2	8	2	9	0	11	2	7	1	8	1	8	2	-1.361	-4.6841	0	0.523629	0
60	lcl|c206427_g2_i4|m.1541	186	6	4	8	6	9	3	10	4	9	3	12	11	11	6	10	6	10	7	-0.359	-2.163	0	0.572027	0
61	lcl|c206531_g1_i1|m.1558	239	1	0	2	2	5	0	7	2	2	0	3	1	1	1	4	1	3	2	-0.655	-2.0093	0	0.579753	0
62	lcl|c206556_g1_i2|m.1565	140	1	0	3	3	2	2	4	2	2	1	1	3	1	1	2	3	2	3	0.194	0.6364	0.921502	0.202759	0.592332
63	lcl|c206732_g2_i1|m.1581	175	0	0	0	0	0	0	0	0	0	0	0	1	0	0	0	0	0	2	0.198	0.4636	1	0.366014	0.562383
64	lcl|c206819_g1_i1|m.1595	359	0	4	0	1	1	3	0	3	0	3	0	4	1	3	0	8	0	3	1.284	3.6674	0	0	0.525628
65	lcl|c206859_g1_i1|m.1600	432	0	0	38	22	22	13	17	16	0	0	0	0	0	0	17	13	41	26	-0.203	-1.4324	8.8e-05	0.616508	4e-06
66	lcl|c207254_g1_i2|m.1628	119	2	3	4	1	2	1	2	1	2	1	0	1	3	2	5	1	2	2	-0.373	-1.1917	0.001626	0.636685	7.8e-05
67	lcl|c207332_g2_i2|m.1633	171	0	0	0	0	0	0	0	0	0	0	45	131	0	0	0	0	83	103	0.75	6.7329	0	0	0.513629
68	lcl|c207636_g1_i1|m.1667	254	2	2	0	8	0	3	2	2	1	3	0	0	1	0	0	2	0	1	0.79	2.1984	0	0	0.552038
69	lcl|c207709_g1_i1|m.1673	168	0	0	0	0	0	0	1	1	1	1	1	1	3	1	0	1	0	0	-0.033	-0.0762	0.985863	0.695568	0.272354
70	lcl|c207931_g1_i1|m.1711	129	0	0	0	0	0	1	0	0	0	0	1	0	0	0	0	0	1	0	0.057	0.1309	1	0.619702	0.420161
71	lcl|c207960_g1_i1|m.1712	216	5	4	8	4	3	2	6	6	4	2	10	4	6	5	6	7	5	4	-0.174	-0.7829	0.074636	0.683757	0.005014
72	lcl|c207967_g2_i1|m.1713	225	1	1	1	0	1	1	4	1	1	0	1	0	0	1	1	1	0	1	-0.157	-0.3807	0.644583	0.724139	0.080507
73	lcl|c208130_g1_i1|m.1735	249	11	9	22	9	22	9	30	8	20	11	16	8	16	7	14	6	14	7	-0.621	-4.5375	0	0.525438	0
74	lcl|c208140_g2_i1|m.1739	331	0	1	0	2	1	1	1	1	0	2	2	5	0	3	0	5	3	3	0.676	2.0424	3e-06	0	0.556801
75	lcl|c208317_g1_i1|m.1768	292	38	29	24	9	33	10	44	17	40	19	41	21	36	18	60	30	51	15	-0.628	-6.3948	0	0.514343	0
76	lcl|c208411_g1_i1|m.1783	277	0	0	0	0	0	0	0	1	0	0	1	0	0	1	0	1	1	1	0.117	0.2743	1	0.530954	0.497399
77	lcl|c208691_g4_i1|m.1828	107	1	0	1	1	4	0	7	4	2	1	3	1	1	0	4	3	6	3	-0.42	-1.4602	6e-05	0.614445	2e-06
78	lcl|c208723_g2_i1|m.1834	255	0	1	0	0	0	0	0	0	1	0	0	1	1	1	1	0	1	2	0.173	0.4042	1	0.422386	0.546095
79	lcl|c208878_g1_i2|m.1846	358	1	6	1	1	3	0	3	3	5	3	3	12	7	6	4	8	3	5	0.574	2.5654	0	0	0.543211
80	lcl|c208930_g1_i1|m.1861	385	1	1	2	0	0	0	1	1	1	0	1	0	1	0	1	0	2	0	-0.103	-0.249	0.854717	0.721918	0.149716
81	lcl|c208940_g4_i1|m.1863	179	1	1	3	1	1	3	0	3	0	2	0	0	0	0	0	2	0	0	0.434	1.1925	0.07863	0.00484	0.589204
82	lcl|c209114_g1_i1|m.1902	450	0	0	0	1	0	2	0	0	1	0	0	1	0	0	0	0	0	0	0.194	0.4576	1	0.371824	0.56089
83	lcl|c209131_g1_i2|m.1905	245	0	1	1	1	0	1	0	1	0	1	0	0	0	0	1	1	0	1	0.077	0.1739	0.999981	0.596578	0.445956
84	lcl|c209191_g2_i1|m.1916	149	2	4	2	3	5	2	3	1	4	5	5	3	5	3	2	3	4	1	-0.071	-0.276	0.818566	0.723475	0.133397
85	lcl|c209256_g1_i1|m.1929	302	0	1	0	0	0	0	2	1	0	0	0	2	0	1	0	1	0	1	0.088	0.2038	1	0.578773	0.462576
86	lcl|c209298_g1_i1|m.1944	110	0	0	1	1	0	1	0	0	0	0	0	0	0	0	1	1	0	1	0.132	0.3106	1	0.503143	0.51296
87	lcl|c209326_g4_i1|m.1952	155	5	3	13	10	10	3	7	1	6	1	9	3	7	2	9	3	10	4	-0.746	-3.665	0	0.535617	0
88	lcl|c209492_g1_i1|m.1979	328	1	0	0	0	1	0	0	2	0	0	0	0	0	0	0	1	0	0	0.201	0.4908	1	0.339491	0.56875
89	lcl|c209513_g1_i2|m.1987	221	0	0	0	0	0	0	1	0	1	0	0	0	0	0	0	0	0	0	0.109	0.2425	1	0.553543	0.482452
90	lcl|c209565_g1_i2|m.1999	280	21	17	23	19	26	17	28	18	20	14	30	14	26	10	22	15	21	18	-0.263	-2.5375	0	0.557588	0
91	lcl|c209565_g1_i2|m.2000	146	7	7	10	11	8	7	8	10	7	10	13	13	10	10	8	13	13	14	0.295	2.0429	3e-06	0	0.556785
92	lcl|c209570_g1_i3|m.2003	273	4	4	4	7	9	6	9	5	7	3	9	3	6	5	9	8	9	4	-0.216	-1.1343	0.003007	0.642307	0.000153
93	lcl|c209696_g5_i6|m.2035	148	0	1	1	0	1	1	0	0	1	1	0	0	1	0	0	0	0	0	0.086	0.2063	1	0.577218	0.463916
94	lcl|c209757_g1_i1|m.2044	245	7	12	9	7	13	12	14	11	11	11	16	14	13	16	15	21	18	11	0.163	1.1916	0.079179	0.00488	0.589247
95	lcl|c209829_g4_i8|m.2051	347	0	0	1	0	0	0	0	0	0	0	0	0	1	0	2	0	0	0	-0.038	-0.085	0.98292	0.697655	0.265678
96	lcl|c209846_g4_i1|m.2055	167	0	0	0	0	1	0	2	0	1	0	1	0	0	0	3	0	0	0	-0.167	-0.4221	0.566481	0.722405	0.064295
97	lcl|c209946_g1_i6|m.2078	207	1	0	1	2	2	0	0	0	1	0	1	1	0	0	1	0	1	0	0.088	0.2143	1	0.572173	0.468152
98	lcl|c210031_g1_i2|m.2100	216	2	1	1	1	1	1	3	1	0	1	0	2	0	2	0	1	1	1	0.002	0.005	1	0.672156	0.333554
99	lcl|c210226_g1_i1|m.2139	123	3	3	5	3	3	2	6	2	5	2	9	3	6	4	11	3	4	4	-0.524	-2.2781	0	0.566895	0
100	lcl|c210228_g3_i1|m.2141	313	0	1	2	1	1	0	0	0	1	0	0	0	1	0	0	0	0	0	0.03	0.0719	1	0.646941	0.381397
101	lcl|c210253_g1_i2|m.2149	206	12	19	14	19	16	15	19	15	19	16	19	21	23	20	21	23	19	21	0.199	1.7943	0.000114	4e-06	0.565347
102	lcl|c210331_g2_i2|m.2158	225	0	1	0	0	1	1	0	0	0	1	0	0	0	0	0	1	0	0	0.082	0.1859	0.999841	0.589606	0.452757
103	lcl|c210338_g2_i1|m.2161	1005	1	4	0	0	1	0	3	2	6	5	0	0	5	0	0	1	1	1	-0.032	-0.1037	0.975559	0.701811	0.251542
104	lcl|c210342_g3_i4|m.2163	180	0	0	0	0	1	0	0	0	0	0	2	1	1	1	1	1	1	1	0.021	0.0548	1	0.653929	0.369513
105	lcl|c210398_g1_i3|m.2174	467	12	20	14	23	14	9	10	9	19	19	21	23	18	16	14	12	19	19	0.225	1.9174	1.9e-05	1e-06	0.561041
106	lcl|c210423_g1_i5|m.2178	136	2	2	3	4	4	2	3	4	2	1	4	1	2	2	2	1	3	2	-0.11	-0.378	0.649576	0.724217	0.081656
107	lcl|c210478_g1_i4|m.2192	239	3	2	5	2	3	1	4	2	3	0	5	1	3	3	6	3	2	2	-0.552	-1.7845	0	0.592663	0
108	lcl|c210539_g3_i4|m.2197	392	0	0	0	1	1	0	0	0	1	2	0	0	0	0	1	1	0	0	0.185	0.4221	1	0.40571	0.551365
109	lcl|c210579_g1_i2|m.2209	180	5	5	3	3	5	7	7	4	6	3	2	0	8	2	3	4	3	1	-0.161	-0.699	0.137215	0.694515	0.009963
110	lcl|c210580_g1_i3|m.2210	449	1	1	2	2	2	2	3	1	0	0	1	1	0	1	0	1	2	1	-0.09	-0.2464	0.857978	0.721735	0.151341
111	lcl|c210652_g1_i2|m.2225	192	0	1	0	0	0	0	0	0	1	1	0	0	1	1	0	0	0	0	0.099	0.2375	1	0.556943	0.479989
112	lcl|c210652_g1_i3|m.2226	195	0	0	0	1	0	1	0	0	0	0	1	0	0	0	0	0	0	0	0.089	0.2157	1	0.571279	0.468885
113	lcl|c210662_g1_i1|m.2231	102	0	3	0	2	1	2	0	3	0	2	0	2	0	2	0	3	0	4	1.004	2.7921	0	0	0.538466
114	lcl|c210720_g2_i2|m.2252	182	0	0	0	0	0	0	0	0	0	0	0	0	0	0	2	4	0	0	0.31	0.7265	0.80191	0.133568	0.599176
115	lcl|c210724_g2_i1|m.2253	513	2	1	5	1	3	1	3	3	3	3	4	1	2	0	5	0	5	0	-0.72	-2.3816	0	0.562806	0
116	lcl|c210735_g5_i3|m.2260	148	6	5	8	5	5	1	8	4	6	2	9	3	7	1	10	3	8	6	-0.632	-3.0562	0	0.545544	0
117	lcl|c210749_g1_i1|m.2273	249	22	11	33	16	32	15	37	14	29	10	28	11	28	15	28	20	33	18	-0.557	-5.2632	0	0.518887	0
118	lcl|c210819_g1_i13|m.2279	185	0	0	0	0	0	0	0	0	0	0	0	0	0	1	0	0	0	1	0.134	0.2989	1	0.512338	0.508117
119	lcl|c210886_g2_i1|m.2286	164	0	1	0	0	1	0	1	0	0	1	0	0	0	0	0	0	0	0	0.096	0.207	1	0.576781	0.46429
120	lcl|c210994_g1_i1|m.2320	304	6	7	10	7	7	4	10	7	3	4	6	6	5	5	4	3	10	7	-0.046	-0.2432	0.861975	0.721502	0.153353
121	lcl|c211001_g1_i6|m.2326	539	1	0	1	1	2	1	2	1	1	0	1	0	2	0	4	0	1	0	-0.335	-0.9108	0.025928	0.667542	0.001579
122	lcl|c211022_g1_i7|m.2328	189	0	0	1	0	1	1	2	0	0	0	0	0	0	0	0	0	2	1	-0.095	-0.2217	0.886908	0.719693	0.167217
123	lcl|c211238_g1_i1|m.2379	233	0	0	1	0	0	0	2	0	0	0	1	0	0	0	1	0	0	0	0.006	0.0141	1	0.669052	0.340255
124	lcl|c211278_g7_i1|m.2402	257	0	0	0	0	0	1	0	2	0	0	0	1	0	0	0	1	0	0	0.176	0.4134	1	0.413855	0.548844
125	lcl|c211368_g3_i1|m.2426	140	0	1	2	4	2	1	3	2	1	1	3	1	1	2	3	4	1	1	0.131	0.4186	1	0.408995	0.55036
126	lcl|c211415_g1_i1|m.2432	158	1	0	5	3	5	2	5	3	2	1	5	0	4	2	5	5	3	2	-0.375	-1.4182	0.000106	0.617577	4e-06
127	lcl|c211436_g1_i2|m.2434	174	1	0	1	0	1	0	2	0	2	0	0	0	0	0	2	0	0	0	-0.126	-0.3092	0.768626	0.724563	0.114789
128	lcl|c211553_g1_i1|m.2455	180	0	0	0	0	0	0	0	0	0	0	0	0	0	0	1	1	1	2	0.186	0.4235	1	0.404393	0.551764
129	lcl|c211563_g8_i2|m.2460	139	1	0	1	1	1	1	1	1	1	1	3	1	1	1	1	0	1	1	-0.109	-0.2598	0.840777	0.722616	0.143065
130	lcl|c211604_g1_i1|m.2470	229	3	0	2	0	0	0	1	0	0	0	2	0	1	0	1	0	2	0	-0.32	-0.7969	0.066957	0.681954	0.004446
131	lcl|c211615_g1_i2|m.2471	102	6	3	8	7	6	4	9	6	4	3	5	5	6	5	6	5	6	5	-0.083	-0.4101	0.589351	0.723007	0.068726
132	lcl|c211660_g1_i1|m.2486	379	1	3	2	3	2	1	1	0	3	0	4	1	2	0	3	2	1	1	-0.184	-0.5422	0.344838	0.712827	0.030913
133	lcl|c211676_g2_i2|m.2489	407	1	1	3	5	0	0	0	2	2	2	0	0	0	2	0	0	1	0	0.378	1.0092	0.272734	0.022315	0.597562
134	lcl|c211676_g2_i3|m.2490	406	1	1	3	5	0	0	0	2	1	2	0	0	0	2	0	0	1	0	0.436	1.1779	0.087971	0.005523	0.589906
135	lcl|c211774_g2_i1|m.2538	118	3	2	4	0	3	2	4	2	5	2	4	1	4	1	3	1	4	2	-0.688	-2.1375	0	0.573243	0
136	lcl|c211861_g1_i1|m.2554	151	5	1	10	3	8	1	9	0	15	0	7	0	11	1	12	2	10	1	-1.73	-5.917	0	0.516244	0
137	lcl|c211914_g5_i4|m.2567	306	2	1	2	1	1	2	1	1	3	0	0	1	2	3	0	2	1	3	0.186	0.5213	0.996805	0.309623	0.575139
138	lcl|c211957_g3_i1|m.2583	182	0	0	0	0	0	0	0	1	0	0	0	1	0	0	0	0	0	0	0.108	0.2414	1	0.554295	0.481913
139	lcl|c212026_g3_i1|m.2608	667	54	38	48	38	49	19	44	20	52	24	60	27	40	28	69	29	70	24	-0.514	-6.5399	0	0.514029	0
140	lcl|c212126_g1_i2|m.2626	243	6	2	7	4	4	2	6	5	8	3	6	1	4	1	6	1	6	0	-0.789	-3.0893	0	0.54488	0
141	lcl|c212208_g2_i4|m.2650	217	1	3	2	2	1	2	3	3	1	2	0	1	1	1	0	1	1	1	0.379	1.0316	0.239299	0.018796	0.596651
142	lcl|c212237_g2_i1|m.2659	530	5	5	10	7	10	4	15	7	7	2	8	1	10	3	9	2	9	3	-0.713	-3.2977	0	0.540944	0
143	lcl|c212277_g3_i1|m.2669	123	0	0	0	0	0	0	0	0	0	1	0	0	0	1	0	0	0	0	0.101	0.2372	1	0.557146	0.47984
144	lcl|c212582_g2_i5|m.2775	326	0	1	0	0	0	0	0	0	0	0	0	1	0	0	0	1	0	0	0.075	0.1771	0.999995	0.594741	0.447787
145	lcl|c212602_g3_i5|m.2781	543	1	2	7	1	9	0	4	1	2	0	3	0	3	0	2	1	10	2	-1.06	-3.4072	0	0.539145	0
146	lcl|c212652_g1_i3|m.2790	341	0	0	0	0	1	0	0	1	0	1	1	3	1	4	1	1	2	3	0.544	1.4731	0.006262	0.00027	0.576826
147	lcl|c212693_g1_i1|m.2804	324	0	0	0	0	0	0	0	0	0	0	1	0	0	0	0	0	3	0	-0.043	-0.1	0.977138	0.701019	0.254332
148	lcl|c212713_g4_i1|m.2814	173	0	0	0	0	1	0	0	0	0	0	0	0	0	0	0	1	1	1	0.106	0.2248	1	0.56539	0.473592
149	lcl|c212727_g5_i1|m.2822	197	7	16	9	26	16	16	5	9	4	12	13	27	2	14	7	9	9	13	0.828	5.9036	0	0	0.514963
150	lcl|c212784_g2_i1|m.2837	282	2	2	3	1	4	2	5	4	2	1	2	1	2	1	5	0	5	0	-0.596	-1.9336	0	0.583892	0
151	lcl|c212802_g1_i2|m.2844	824	0	0	0	4	0	0	0	1	0	1	0	2	0	1	0	1	0	1	0.42	1.0894	0.165868	0.011837	0.594099
152	lcl|c212821_g1_i2|m.2859	163	3	0	5	0	2	0	3	1	5	0	2	0	4	2	4	0	3	0	-0.926	-2.6501	0	0.554451	0
153	lcl|c212826_g3_i1|m.2861	453	16	20	20	10	28	24	25	35	15	18	21	24	20	29	25	22	22	15	0.188	1.8393	6e-05	2e-06	0.563772
154	lcl|c212839_g1_i3|m.2877	288	4	3	6	4	3	3	6	4	5	2	4	3	3	3	4	2	5	3	-0.231	-0.9457	0.018979	0.663285	0.001126
155	lcl|c212928_g1_i1|m.2894	484	0	0	0	0	1	0	0	0	0	1	0	0	0	0	0	0	0	1	0.088	0.1949	0.999945	0.584224	0.457744
156	lcl|c212937_g3_i2|m.2900	184	1	2	4	2	2	2	1	2	1	4	2	3	3	2	2	4	1	5	0.546	1.8579	4.5e-05	2e-06	0.56312
157	lcl|c213022_g4_i5|m.2921	208	2	2	7	4	4	1	6	1	7	1	6	7	4	1	11	10	9	1	-0.539	-2.3378	0	0.564474	0
158	lcl|c213117_g1_i3|m.2966	244	4	3	8	5	7	1	3	3	8	3	6	3	7	2	7	4	8	4	-0.563	-2.4749	0	0.559552	0
159	lcl|c213134_g1_i3|m.2976	212	0	1	1	0	1	0	0	0	0	0	0	0	0	0	0	1	0	0	0.08	0.1841	0.999737	0.590665	0.451748
160	lcl|c213147_g4_i1|m.2980	151	8	5	4	1	8	1	12	1	5	3	9	3	9	2	16	7	16	3	-1.021	-4.6922	0	0.52353	0
161	lcl|c213160_g2_i5|m.2982	128	25	28	31	28	33	26	46	32	38	27	29	28	30	33	34	37	29	28	0.075	0.9524	0.368998	0.033826	0.599584
162	lcl|c213259_g2_i1|m.3003	151	0	0	1	0	0	1	0	0	0	0	0	0	0	0	0	0	1	0	0.097	0.225	1	0.565259	0.473694
163	lcl|c213262_g2_i4|m.3006	212	0	1	0	0	0	0	0	0	1	0	2	0	0	0	2	0	2	0	-0.168	-0.4163	0.577647	0.722706	0.066411
164	lcl|c213278_g3_i2|m.3010	328	2	0	2	1	5	0	1	0	3	0	2	2	1	2	2	1	1	3	-0.204	-0.6157	0.232414	0.704737	0.018635
165	lcl|c213306_g2_i1|m.3016	203	1	2	3	4	1	4	2	1	3	2	2	4	1	0	0	2	1	1	0.449	1.38	0.015724	0.000757	0.580609
166	lcl|c213311_g2_i1|m.3017	436	0	0	0	0	0	0	0	0	0	0	0	0	0	0	0	1	0	1	0.05	0.1133	1	0.628353	0.408986
167	lcl|c213314_g8_i4|m.3021	555	4	5	6	7	6	4	4	3	6	4	4	3	3	4	4	5	5	3	0.049	0.2221	1	0.567152	0.472206
168	lcl|c213369_g2_i2|m.3062	182	1	0	4	0	2	0	0	0	2	0	0	0	2	0	0	0	1	0	-0.342	-0.887	0.031901	0.670497	0.001978
169	lcl|c213419_g4_i1|m.3080	565	0	2	1	0	0	1	1	1	2	2	0	0	1	0	0	0	0	0	0.121	0.2996	1	0.511794	0.508411
170	lcl|c213465_g6_i10|m.3092	373	0	1	1	1	1	2	1	3	2	2	1	2	1	3	1	3	1	2	0.7	1.9845	7e-06	0	0.558732
171	lcl|c213496_g2_i3|m.3109	126	1	2	4	4	5	2	5	3	4	1	4	1	0	1	2	3	2	2	-0.241	-0.8345	0.049568	0.677133	0.003196
172	lcl|c213534_g3_i4|m.3118	287	4	6	7	2	8	4	7	7	3	4	4	9	5	7	6	13	10	15	0.37	2.0168	4e-06	0	0.557646
173	lcl|c213677_g1_i4|m.3168	563	1	0	4	2	7	1	10	5	2	2	2	2	4	2	7	3	4	1	-0.57	-2.0768	0	0.576245	0
174	lcl|c213742_g1_i10|m.3190	163	6	4	6	2	5	1	5	3	5	2	7	3	6	3	8	6	6	3	-0.545	-2.279	0	0.566857	0
175	lcl|c213743_g5_i1|m.3191	186	1	1	1	0	1	1	1	1	0	1	1	0	1	0	1	0	2	2	0.082	0.1908	0.999985	0.586693	0.455485
176	lcl|c213837_g2_i3|m.3220	383	9	6	14	8	13	3	11	3	8	7	3	2	7	5	6	3	6	6	-0.414	-2.2796	0	0.566832	0
177	lcl|c213850_g3_i2|m.3229	370	2	0	5	0	1	0	2	0	4	0	2	0	1	0	1	0	2	0	-0.635	-1.6563	3e-06	0.600835	0
178	lcl|c213850_g4_i1|m.3231	390	0	0	4	0	2	0	1	0	0	0	1	1	0	2	1	2	2	0	-0.105	-0.2779	0.815862	0.723561	0.132287
179	lcl|c213886_g7_i2|m.3271	1350	0	0	0	1	0	0	0	0	0	1	0	0	0	0	1	0	0	0	0.02	0.0444	1	0.657992	0.36216
180	lcl|c213886_g9_i1|m.3273	204	0	1	1	2	0	3	0	1	0	1	0	0	1	1	1	1	0	1	0.317	0.7656	0.734483	0.108846	0.600682
181	lcl|c213888_g2_i1|m.3274	225	0	1	0	0	0	1	0	0	0	0	0	1	1	0	0	0	0	0	0.048	0.1108	1	0.629544	0.40737
182	lcl|c213946_g11_i4|m.3301	543	1	2	2	3	1	1	1	2	0	0	4	2	0	1	5	3	2	3	0.124	0.38	1	0.444382	0.538447
183	lcl|c214032_g1_i4|m.3331	161	15	14	36	11	39	16	42	31	30	16	34	29	44	28	45	35	54	26	-0.315	-3.5742	0	0.536779	0
184	lcl|c214067_g1_i1|m.3351	120	0	0	0	0	0	1	1	1	0	1	0	1	1	1	1	2	0	0	0.198	0.4523	1	0.376939	0.559544
185	lcl|c214108_g4_i4|m.3369	159	8	7	18	9	12	5	11	5	12	3	16	6	9	4	15	6	13	4	-0.68	-4.0969	0	0.530414	0
186	lcl|c214118_g1_i2|m.3372	151	14	9	23	18	19	14	3	1	12	10	21	15	21	14	23	18	11	8	-0.164	-1.291	0.000524	0.627766	2.3e-05
187	lcl|c214164_g1_i8|m.3381	700	3	2	1	1	2	2	2	2	2	2	2	0	0	1	2	4	2	2	0.116	0.3633	1	0.459141	0.532806
188	lcl|c214211_g3_i3|m.3396	158	0	3	2	2	3	5	1	5	2	3	2	6	3	5	1	5	2	1	0.867	3.0576	0	0	0.533335
189	lcl|c214228_g4_i5|m.3407	833	0	0	3	2	0	0	0	0	0	0	1	0	0	0	2	2	1	2	0.083	0.2157	1	0.571279	0.468885
190	lcl|c214229_g1_i1|m.3410	367	0	0	2	1	4	0	0	1	0	0	0	0	2	2	3	2	4	2	-0.266	-0.7291	0.111231	0.690679	0.007838
191	lcl|c214242_g1_i2|m.3413	293	3	13	1	6	3	6	4	4	2	9	8	21	7	10	2	7	4	6	1.014	4.8391	0	0	0.518229
192	lcl|c214242_g1_i3|m.3415	187	2	6	0	3	2	3	3	2	2	2	5	8	3	5	1	2	3	3	0.557	2.0096	5e-06	0	0.557887
193	lcl|c214330_g10_i3|m.3454	316	0	1	0	0	0	0	1	1	1	1	0	1	0	1	0	2	0	1	0.17	0.4212	1	0.406556	0.551108
194	lcl|c214356_g7_i5|m.3463	498	1	2	2	1	2	0	2	1	2	2	2	0	1	1	1	0	1	1	-0.102	-0.2673	0.830717	0.723041	0.138543
195	lcl|c214397_g6_i4|m.3476	257	3	3	3	2	1	0	5	1	5	3	4	1	4	2	3	1	3	2	-0.496	-1.6336	5e-06	0.602339	0
196	lcl|c214418_g2_i7|m.3489	275	0	0	0	0	0	0	1	1	0	0	0	0	0	0	0	0	0	1	0.114	0.2775	1	0.528589	0.498835
197	lcl|c214499_g2_i2|m.3512	173	0	1	1	0	1	1	0	1	0	0	1	2	0	1	0	1	3	0	0.055	0.1279	1	0.621209	0.41828
198	lcl|c214530_g4_i1|m.3518	242	0	1	6	1	2	1	3	0	2	0	8	1	4	2	4	1	6	3	-0.904	-2.8823	0	0.549112	0
199	lcl|c214539_g3_i1|m.3522	509	0	2	2	0	2	1	3	4	1	2	2	1	1	0	2	1	2	1	-0.001	-0.0032	0.999753	0.674869	0.327474
200	lcl|c214556_g2_i3|m.3526	228	0	0	1	0	0	0	0	0	0	0	1	0	1	0	1	0	1	2	0.157	0.3592	1	0.462707	0.531374
201	lcl|c214559_g9_i1|m.3528	225	1	1	1	0	2	1	2	1	2	3	2	2	4	2	2	2	3	3	-0.018	-0.0546	0.991812	0.690079	0.28876
202	lcl|c214573_g3_i1|m.3534	278	5	5	8	3	4	1	6	5	1	3	10	6	5	2	11	3	8	4	-0.45	-2.1503	0	0.572629	0
203	lcl|c214584_g4_i1|m.3540	241	3	4	1	4	1	4	3	5	5	8	4	3	3	3	4	4	1	4	0.566	2.3051	0	0	0.549193
204	lcl|c214602_g8_i1|m.3549	114	0	0	0	0	0	0	0	0	0	1	0	0	0	0	0	1	0	1	0.153	0.3478	1	0.472503	0.527296
205	lcl|c214652_g1_i3|m.3567	315	0	0	0	0	0	0	1	1	0	0	0	0	0	0	1	0	0	0	0.064	0.1478	1	0.610955	0.430559
206	lcl|c214653_g2_i1|m.3571	359	1	0	1	2	1	1	1	2	1	1	1	1	0	1	1	1	1	1	0.277	0.7028	0.838348	0.150169	0.597861
207	lcl|c214656_g8_i1|m.3574	143	0	0	0	0	0	0	0	0	0	0	0	0	1	1	0	0	0	1	0.102	0.2377	1	0.556808	0.480088
208	lcl|c214667_g2_i8|m.3577	491	0	1	0	0	0	0	1	0	0	0	0	0	0	0	0	0	0	0	0.056	0.128	1	0.621159	0.418343
209	lcl|c214691_g1_i1|m.3614	371	0	2	2	3	1	1	2	3	1	3	0	1	1	2	2	2	2	1	0.408	1.1399	0.116672	0.007723	0.591727
210	lcl|c214714_g4_i1|m.3630	233	1	0	1	0	0	0	0	0	0	0	0	0	0	0	1	0	0	0	0.089	0.2002	0.999896	0.580994	0.460633
211	lcl|c214720_g1_i1|m.3639	283	0	0	1	1	0	0	1	1	0	0	0	0	0	0	0	0	1	0	0.078	0.1706	0.999873	0.598454	0.444054
212	lcl|c214720_g2_i1|m.3640	316	0	0	1	0	0	0	0	0	0	0	0	1	0	1	1	1	0	0	0.103	0.2234	1	0.566306	0.472875
213	lcl|c214766_g5_i2|m.3659	129	1	0	1	0	0	0	1	0	0	0	0	0	0	1	1	1	1	0	0.092	0.1996	0.999857	0.581361	0.460307
214	lcl|c214775_g8_i5|m.3661	272	0	2	0	3	0	0	0	1	0	1	0	1	0	1	0	1	0	1	0.319	0.7297	0.796574	0.131419	0.599329
215	lcl|c214832_g3_i2|m.3697	335	11	22	17	22	17	19	14	22	19	15	19	32	24	25	17	27	25	31	0.452	4.3392	0	0	0.520702
216	lcl|c214891_g1_i1|m.3715	193	0	0	2	0	2	1	1	1	1	0	1	0	1	1	1	2	0	1	0.018	0.0432	1	0.658452	0.361306
217	lcl|c214915_g6_i2|m.3733	114	0	1	0	0	0	0	0	1	0	1	0	1	1	0	1	0	1	1	0.104	0.2302	1	0.561832	0.476336
218	lcl|c214925_g1_i1|m.3737	205	0	0	1	2	1	0	1	0	0	0	3	1	1	1	1	2	3	1	-0.02	-0.0542	0.991903	0.689972	0.289063
219	lcl|c214975_g3_i2|m.3761	224	0	2	1	2	1	2	3	1	2	3	0	1	1	0	1	2	0	0	0.313	0.8398	0.590615	0.071024	0.601617
220	lcl|c215093_g1_i2|m.3818	140	1	1	3	4	3	5	3	3	4	2	0	0	4	4	2	2	0	0	0.243	0.8352	0.599837	0.073034	0.601622
221	lcl|c215124_g2_i2|m.3835	338	0	0	1	0	2	0	1	0	1	0	0	0	0	0	0	0	0	0	0.005	0.0122	1	0.669708	0.33886
222	lcl|c215258_g3_i5|m.3905	197	1	1	0	1	0	3	1	4	1	2	0	1	1	4	1	2	0	2	0.836	2.0639	2e-06	0	0.556104
223	lcl|c215279_g2_i6|m.3910	210	1	1	0	0	0	1	2	1	0	1	0	1	0	0	0	0	0	1	-0.031	-0.0712	0.987404	0.694343	0.276151
224	lcl|c215282_g4_i10|m.3912	146	1	0	0	1	1	1	0	0	1	0	1	0	0	0	2	0	0	0	0.016	0.0381	1	0.660385	0.357662
225	lcl|c215299_g2_i2|m.3927	127	0	0	0	0	0	0	0	0	0	0	0	1	0	1	0	0	0	0	0.061	0.1366	1	0.6168	0.423705
226	lcl|c215313_g3_i2|m.3930	518	0	0	0	1	0	2	0	3	0	0	0	2	0	0	0	2	1	0	0.491	1.2243	0.061155	0.003608	0.587681
227	lcl|c215316_g1_i1|m.3942	437	7	11	10	13	9	15	17	15	5	8	14	19	8	9	8	15	16	19	0.431	3.2789	0	0	0.529886
228	lcl|c215321_g8_i1|m.3945	569	0	0	0	1	0	1	0	0	0	0	0	0	0	0	0	0	0	0	0.037	0.088	1	0.639999	0.392334
229	lcl|c215384_g1_i4|m.3995	162	0	0	1	0	0	1	0	0	0	0	0	0	1	2	0	0	0	0	0.181	0.4149	1	0.412456	0.549284
230	lcl|c215388_g4_i3|m.4003	294	0	0	0	0	0	1	0	0	0	0	0	0	0	0	1	0	0	0	0.083	0.1873	0.999903	0.588778	0.45354
231	lcl|c215397_g1_i1|m.4004	143	1	0	2	1	1	1	3	1	0	0	3	0	2	0	3	0	2	3	-0.312	-0.8373	0.048445	0.676776	0.003117
232	lcl|c215430_g1_i6|m.4026	280	0	0	0	1	0	0	0	1	0	1	0	0	0	0	0	0	0	0	0.059	0.1391	1	0.615511	0.425247
233	lcl|c215450_g1_i1|m.4033	1756	0	2	4	3	0	1	3	2	1	4	1	2	3	8	0	4	2	2	0.577	1.8941	2.6e-05	1e-06	0.561853
234	lcl|c215455_g1_i1|m.4036	173	2	2	10	2	8	2	4	3	10	5	5	4	9	4	10	5	7	2	-0.593	-2.6395	0	0.554726	0
235	lcl|c215456_g2_i2|m.4039	171	0	0	3	0	3	0	1	0	0	0	2	0	0	0	1	0	1	0	-0.297	-0.7338	0.107549	0.690076	0.007545
236	lcl|c215465_g1_i1|m.4044	322	35	26	46	38	40	24	41	27	44	29	30	23	28	20	31	31	34	27	-0.129	-1.4663	5.5e-05	0.613998	2e-06
237	lcl|c215492_g2_i9|m.4058	328	47	76	71	71	91	73	80	70	74	76	71	92	85	100	79	90	97	90	0.229	4.3612	0	0	0.52058
238	lcl|c215540_g1_i1|m.4079	129	0	0	0	1	1	0	2	0	0	0	0	0	0	0	1	0	0	0	0.032	0.0769	1	0.644822	0.384821
239	lcl|c215551_g6_i1|m.4083	138	0	2	1	0	0	1	2	1	0	1	1	1	1	0	0	2	0	0	0.184	0.4677	1	0.362034	0.563385
240	lcl|c215553_g1_i10|m.4084	162	0	0	1	1	0	1	1	1	0	2	1	2	0	1	3	1	2	1	0.039	0.0969	1	0.636006	0.398268
241	lcl|c215606_g3_i1|m.4107	123	0	1	3	2	4	0	4	2	3	1	2	2	2	1	2	0	5	2	-0.484	-1.3983	0.000138	0.619096	6e-06
242	lcl|c215611_g3_i1|m.4117	295	0	0	0	0	0	0	0	0	0	1	0	0	0	0	0	0	0	1	0.096	0.2071	1	0.576719	0.464343
243	lcl|c215616_g6_i2|m.4120	315	8	9	14	12	11	8	14	17	10	13	10	12	9	18	21	32	19	17	0.337	2.7367	0	0	0.539604
244	lcl|c215632_g4_i4|m.4127	584	0	0	0	0	0	0	0	1	0	1	0	0	0	0	0	0	0	0	0.077	0.164	1	0.602156	0.440212
245	lcl|c215636_g1_i1|m.4133	232	0	0	1	0	0	0	0	0	0	0	1	0	1	0	1	0	1	0	0.059	0.1377	1	0.616234	0.424384
246	lcl|c215676_g2_i1|m.4150	125	0	0	0	0	0	0	2	0	0	0	1	0	1	0	2	0	0	0	-0.055	-0.1285	0.963267	0.706745	0.232984
247	lcl|c215720_g4_i1|m.4168	328	0	0	1	0	0	0	0	0	0	0	0	0	1	0	0	0	0	0	0.084	0.1965	0.99989	0.583253	0.458619
248	lcl|c215761_g1_i1|m.4176	358	0	0	1	0	1	1	1	0	0	1	0	1	0	0	1	0	1	0	0.123	0.2785	1	0.527846	0.499281
249	lcl|c215763_g2_i3|m.4184	532	2	2	5	3	5	2	5	3	5	1	7	5	8	3	7	3	10	3	-0.578	-2.4391	0	0.560753	0
250	lcl|c215763_g2_i6|m.4185	446	2	2	5	3	5	2	4	3	3	1	6	4	6	2	4	3	7	3	-0.419	-1.6933	2e-06	0.598419	0
251	lcl|c215819_g3_i2|m.4218	242	0	1	1	1	0	1	2	2	0	0	0	0	0	1	1	0	0	0	0.082	0.205	1	0.578028	0.46322
252	lcl|c215822_g3_i9|m.4221	283	2	0	1	2	1	0	0	0	2	0	0	0	1	1	0	0	0	0	-0.006	-0.0145	0.998776	0.678479	0.31904
253	lcl|c215838_g2_i1|m.4235	383	0	0	1	0	0	0	0	0	0	0	1	0	1	0	1	0	1	0	0.046	0.1103	1	0.629781	0.407047
254	lcl|c215848_g2_i7|m.4237	145	2	2	1	0	1	1	2	1	3	1	1	1	1	0	1	1	1	0	-0.126	-0.3127	0.763107	0.724628	0.112926
255	lcl|c215881_g2_i2|m.4262	264	0	0	1	0	0	0	0	0	2	0	0	0	0	0	0	0	0	0	0.01	0.0222	1	0.666205	0.346175
256	lcl|c215894_g1_i3|m.4266	158	0	0	0	0	1	0	1	1	0	0	0	1	0	0	0	0	1	0	0.111	0.257	1	0.54345	0.489422
257	lcl|c215924_g3_i1|m.4285	145	4	0	8	0	0	0	5	0	7	0	3	0	11	0	5	0	9	0	-1.517	-4.7529	0	0.522803	0
258	lcl|c215933_g1_i1|m.4300	361	0	0	0	0	0	1	0	1	0	0	0	0	0	2	0	0	0	0	0.194	0.4395	1	0.389218	0.556184
259	lcl|c215957_g2_i1|m.4319	280	12	12	9	12	9	3	12	15	13	7	13	10	10	11	14	9	12	8	-0.021	-0.1526	0.948338	0.710924	0.215268
260	lcl|c215957_g2_i7|m.4321	345	8	14	7	10	8	5	12	16	13	13	14	13	10	10	12	13	6	7	0.262	1.8151	8.5e-05	3e-06	0.564619
261	lcl|c215963_g8_i2|m.4326	221	5	4	13	15	9	14	13	16	10	4	15	15	11	9	21	18	15	19	0.182	1.3693	0.017382	0.000848	0.581067
262	lcl|c215996_g2_i2|m.4340	263	0	0	0	0	0	0	0	2	0	0	0	0	0	0	0	0	0	0	0.16	0.4	1	0.426252	0.544812
263	lcl|c216002_g1_i6|m.4347	115	0	0	0	0	0	0	0	0	0	0	0	0	0	0	0	0	1	1	0.115	0.2542	1	0.545427	0.488097
264	lcl|c216038_g5_i1|m.4365	301	3	1	7	7	4	4	4	2	5	1	0	2	4	1	5	2	8	5	-0.301	-1.1288	0.003185	0.642865	0.000162
265	lcl|c216057_g3_i1|m.4371	439	5	4	6	7	15	8	10	4	8	6	8	6	8	7	14	13	11	7	-0.133	-0.8037	0.063473	0.68108	0.004192
266	lcl|c216124_g1_i2|m.4405	114	16	15	15	20	14	14	16	12	24	21	17	14	15	15	17	12	15	11	0.066	0.5533	0.983661	0.278611	0.580988
267	lcl|c216124_g1_i3|m.4406	123	17	12	15	14	15	11	13	13	20	13	17	13	14	13	17	12	14	11	-0.069	-0.5307	0.364545	0.713972	0.033329
268	lcl|c216129_g1_i2|m.4409	163	3	1	2	0	3	2	5	4	6	0	5	4	2	4	5	8	3	2	-0.065	-0.2529	0.849807	0.722182	0.147296
269	lcl|c216163_g1_i3|m.4416	494	1	1	2	1	2	0	1	2	1	0	1	0	1	1	3	1	2	0	-0.182	-0.4566	0.500538	0.720266	0.052734
270	lcl|c216188_g2_i2|m.4423	126	1	1	2	0	1	1	3	1	0	0	1	1	1	0	3	0	3	2	-0.3	-0.7724	0.080864	0.68511	0.00548
271	lcl|c216194_g2_i1|m.4425	398	1	2	3	3	6	1	6	1	2	1	3	3	3	2	1	5	5	3	-0.182	-0.6608	0.176505	0.699296	0.013369
272	lcl|c216201_g2_i1|m.4428	114	1	1	0	2	1	2	0	1	1	1	0	0	1	1	0	0	0	0	0.341	0.7819	0.704368	0.099529	0.601087
273	lcl|c216243_g3_i1|m.4453	454	1	0	2	1	2	0	2	1	0	0	1	0	0	0	1	1	1	0	-0.134	-0.3336	0.728484	0.724821	0.102189
274	lcl|c216289_g7_i1|m.4487	250	0	1	2	1	4	1	3	3	2	1	5	3	3	5	5	4	4	1	-0.206	-0.7212	0.117646	0.691689	0.008353
275	lcl|c216306_g1_i11|m.4517	105	0	0	0	1	0	0	0	0	0	1	0	0	1	0	1	0	0	0	0.1	0.2207	1	0.568061	0.471484
276	lcl|c216377_g1_i3|m.4559	370	2	1	3	1	4	0	7	0	3	0	3	1	3	0	6	0	4	0	-1.089	-3.2885	0	0.541105	0
277	lcl|c216448_g1_i1|m.4592	246	4	4	7	5	6	2	5	5	5	4	5	5	5	3	5	3	7	6	-0.129	-0.5937	0.263439	0.707279	0.021783
278	lcl|c216467_g10_i1|m.4595	168	0	0	13	8	7	1	13	6	0	0	7	2	0	0	0	0	1	0	-0.533	-2.0328	0	0.578512	0
279	lcl|c216467_g8_i1|m.4596	129	2	3	0	0	0	2	0	0	3	3	2	1	2	2	3	4	1	0	0.251	0.7662	0.733409	0.108493	0.600699
280	lcl|c216467_g8_i2|m.4597	196	2	1	4	4	2	2	5	3	1	1	1	0	1	1	1	1	0	0	-0.04	-0.1172	0.969242	0.704578	0.241406
281	lcl|c216498_g3_i3|m.4612	253	0	1	1	0	2	1	0	0	1	0	1	0	1	0	1	0	2	0	-0.071	-0.1633	0.94063	0.712589	0.207534
282	lcl|c216500_g6_i5|m.4616	239	1	0	0	0	0	0	0	1	1	0	2	1	1	0	1	2	2	0	0.014	0.0339	1	0.661953	0.354647
283	lcl|c216527_g1_i2|m.4625	544	0	0	1	0	1	0	0	0	0	0	0	0	0	0	0	0	0	1	0.098	0.2352	1	0.558493	0.478845
284	lcl|c216539_g3_i3|m.4633	184	0	0	0	1	1	0	1	1	1	2	1	5	1	3	1	4	0	1	0.809	2.1102	1e-06	0	0.554644
285	lcl|c216567_g2_i2|m.4643	438	0	0	2	0	5	1	2	0	3	0	2	0	3	1	2	1	1	2	-0.534	-1.4911	3.9e-05	0.612199	2e-06
286	lcl|c216571_g1_i1|m.4650	422	0	2	0	1	1	0	0	1	0	0	1	2	0	1	1	0	0	2	0.349	0.8366	0.597019	0.072417	0.601621
287	lcl|c216621_g3_i1|m.4676	189	78	44	62	31	70	26	92	42	83	13	60	24	79	30	56	23	81	45	-0.707	-9.6872	0	0.511585	0
288	lcl|c216645_g1_i1|m.4691	348	1	0	3	0	2	0	3	0	4	0	1	1	1	0	6	0	3	0	-0.776	-2.0867	0	0.575745	0
289	lcl|c216647_g6_i3|m.4694	462	0	0	0	1	0	2	0	0	0	1	0	0	0	2	0	0	1	1	0.254	0.6111	0.94515	0.224877	0.589435
290	lcl|c216650_g2_i1|m.4697	668	3	5	4	8	5	5	6	8	3	4	3	7	4	4	3	6	3	5	0.571	2.4171	0	0	0.546498
291	lcl|c216655_g1_i1|m.4705	553	26	19	24	28	21	20	35	25	21	17	33	13	34	13	41	25	40	24	-0.245	-2.5889	0	0.556097	0
292	lcl|c216702_g5_i1|m.4730	206	0	0	4	0	0	1	5	1	1	1	3	1	2	0	1	1	3	1	-0.66	-1.7908	0	0.592276	0
293	lcl|c216705_g1_i4|m.4732	513	2	0	3	0	3	1	2	0	4	0	0	1	1	1	1	0	0	0	-0.511	-1.3006	0.000467	0.626953	2e-05
294	lcl|c216784_g1_i1|m.4762	166	1	0	1	0	0	0	1	0	0	0	0	0	1	0	0	0	0	0	0.115	0.2541	1	0.545497	0.488049
295	lcl|c216818_g1_i2|m.4792	499	1	1	0	1	1	1	1	2	1	1	1	1	1	0	2	2	1	1	0.143	0.3489	1	0.471566	0.527696
296	lcl|c216824_g6_i1|m.4796	413	0	0	0	0	0	0	0	0	0	0	1	0	1	0	1	0	0	0	0.082	0.2005	0.999915	0.580809	0.460795
297	lcl|c216848_g3_i4|m.4809	337	4	3	2	2	7	4	8	5	3	2	8	3	5	3	10	9	8	4	-0.282	-1.356	0.000237	0.622411	1e-05
298	lcl|c216872_g3_i2|m.4822	168	0	0	0	0	0	0	0	1	0	1	0	0	0	0	0	0	0	0	0.098	0.2324	1	0.560368	0.477444
299	lcl|c216916_g1_i2|m.4843	162	0	0	0	0	0	0	1	0	0	0	0	0	0	0	1	0	0	1	0.138	0.3211	1	0.494708	0.517168
300	lcl|c216942_g4_i3|m.4860	274	5	4	12	8	7	5	12	8	9	5	16	4	5	3	10	1	13	3	-0.598	-3.1537	0	0.543611	0
301	lcl|c216953_g1_i3|m.4865	235	0	0	1	0	1	0	1	0	2	1	1	1	2	1	1	1	2	2	-0.055	-0.1419	0.955333	0.709142	0.223087
302	lcl|c216995_g9_i1|m.4890	143	0	0	0	0	0	0	1	0	0	0	1	0	0	0	1	1	1	1	0.075	0.1802	0.999925	0.592946	0.449549
303	lcl|c217005_g3_i1|m.4893	516	1	4	2	8	4	4	2	2	4	1	4	10	2	3	2	6	3	2	0.641	2.4457	0	0	0.545845
304	lcl|c217046_g2_i2|m.4921	339	0	0	1	1	0	0	3	1	0	0	2	1	2	1	3	0	3	0	-0.431	-1.0734	0.00561	0.648669	0.0003
305	lcl|c217062_g3_i1|m.4934	311	1	1	2	1	2	1	2	1	2	1	2	1	2	1	2	1	2	1	-0.484	-1.1992	0.001497	0.635977	7.2e-05
306	lcl|c217096_g5_i1|m.4965	114	1	0	1	0	1	0	2	1	3	0	0	0	1	0	1	0	1	0	-0.125	-0.2964	0.788593	0.724248	0.121767
307	lcl|c217098_g2_i2|m.4966	169	1	0	0	0	1	0	0	0	1	0	1	0	2	0	2	1	2	1	-0.169	-0.4024	0.604043	0.723352	0.071684
308	lcl|c217146_g1_i1|m.4997	510	2	0	0	0	0	0	0	0	1	0	0	1	0	1	0	1	1	0	0.027	0.0612	1	0.651359	0.373992
309	lcl|c217182_g4_i2|m.5020	118	0	0	0	0	0	0	0	0	0	0	0	1	0	0	0	1	0	0	0.039	0.0906	1	0.638844	0.394076
310	lcl|c217195_g5_i2|m.5022	138	13	15	25	19	20	12	13	13	16	11	24	18	21	15	31	38	27	25	0.033	0.3271	1	0.48981	0.519516
311	lcl|c217199_g3_i2|m.5026	225	0	3	4	2	6	1	2	4	2	3	3	2	2	4	3	1	0	1	0.029	0.0991	1	0.635002	0.399723
312	lcl|c217202_g3_i1|m.5028	315	0	0	0	0	0	1	0	0	0	0	0	0	0	0	0	0	0	1	0.09	0.2084	1	0.575904	0.465036
313	lcl|c217203_g1_i3|m.5031	482	0	0	1	0	1	0	1	0	1	0	1	0	1	0	1	0	1	0	0.096	0.2212	1	0.567737	0.471742
314	lcl|c217263_g3_i1|m.5056	281	0	0	0	1	0	0	0	0	0	1	0	1	0	1	0	0	0	0	0.07	0.1571	1	0.605954	0.436139
315	lcl|c217312_g3_i1|m.5102	175	0	0	0	0	0	0	1	0	1	0	0	0	0	1	0	0	0	0	0.087	0.1803	0.999921	0.592888	0.449605
316	lcl|c217326_g3_i1|m.5105	483	0	1	1	1	1	1	1	1	3	1	1	1	1	1	1	1	1	2	-0.042	-0.1032	0.975777	0.701705	0.251919
317	lcl|c217341_g1_i2|m.5116	153	4	7	7	5	9	5	7	9	7	6	8	7	6	6	7	7	10	6	0.051	0.2848	1	0.523128	0.502063
318	lcl|c217427_g4_i1|m.5185	235	3	3	5	4	5	3	4	4	7	3	8	4	6	3	4	2	3	3	-0.253	-1.0583	0.006521	0.65031	0.000354
319	lcl|c217447_g9_i5|m.5205	1674	35	47	70	54	55	48	78	55	45	31	50	44	54	42	46	62	64	59	0.046	0.6558	0.900291	0.186524	0.594248
320	lcl|c217466_g1_i3|m.5215	389	54	33	27	27	101	49	113	71	72	52	91	84	95	58	121	93	118	76	-0.206	-3.8936	0	0.532808	0
321	lcl|c217500_g3_i1|m.5226	284	0	0	1	1	1	0	1	0	2	0	0	0	0	0	0	0	0	0	0	0.0011	0.999948	0.673456	0.330667
322	lcl|c217534_g1_i2|m.5231	210	4	1	5	4	5	1	3	2	4	1	5	2	3	3	5	4	4	2	-0.468	-1.7457	1e-06	0.595077	0
323	lcl|c217573_g1_i1|m.5252	230	5	5	8	3	9	4	14	3	11	1	8	4	4	3	8	2	8	5	-0.752	-3.5609	0	0.536955	0
324	lcl|c217576_g1_i1|m.5259	572	0	0	0	0	0	0	1	0	0	0	0	1	0	0	0	0	0	0	0.024	0.0541	1	0.654207	0.369021
325	lcl|c217585_g1_i2|m.5268	241	0	1	0	0	0	0	1	0	0	1	0	1	0	3	0	0	1	1	0.288	0.6538	0.902676	0.188167	0.594062
326	lcl|c217591_g3_i7|m.5275	177	0	0	0	1	0	0	0	0	0	0	1	0	0	0	1	0	1	0	0.08	0.1882	0.999934	0.588243	0.454041
327	lcl|c217621_g3_i1|m.5289	392	0	0	0	0	0	1	1	0	1	0	1	1	0	1	0	0	0	1	0.107	0.2295	1	0.562296	0.475982
328	lcl|c217621_g5_i1|m.5291	200	0	1	0	0	0	0	0	0	0	1	0	0	0	0	0	1	0	0	0.111	0.2473	1	0.550242	0.484788
329	lcl|c217626_g1_i4|m.5292	302	1	0	0	1	1	0	0	1	0	1	1	0	0	1	0	0	1	0	0.097	0.2229	1	0.566632	0.472618
330	lcl|c217645_g1_i1|m.5302	248	0	0	1	0	1	0	1	0	0	0	1	0	0	0	0	0	1	0	0.098	0.2286	1	0.562891	0.475526
331	lcl|c217654_g5_i4|m.5303	143	2	5	6	4	8	5	9	4	5	4	8	4	8	2	8	4	7	4	-0.347	-1.5776	1.1e-05	0.606125	0
332	lcl|c217655_g1_i10|m.5304	196	0	1	2	1	0	3	1	1	1	0	0	1	0	0	0	1	1	0	0.203	0.4788	1	0.351222	0.566021
333	lcl|c217670_g3_i2|m.5308	236	0	0	1	0	0	1	0	0	0	0	0	0	1	0	0	0	0	0	0.048	0.1056	1	0.631995	0.40399
334	lcl|c217684_g1_i2|m.5317	187	0	0	0	0	0	0	1	0	0	0	1	1	0	0	1	0	0	0	0.076	0.1733	0.999968	0.59692	0.445611
335	lcl|c217701_g4_i1|m.5329	333	0	0	1	1	0	1	1	2	0	0	1	0	0	0	3	0	0	0	-0.022	-0.0516	0.992474	0.689275	0.291037
336	lcl|c217724_g1_i1|m.5344	242	0	0	0	0	0	0	0	0	0	0	0	0	1	2	0	0	0	0	0.197	0.4259	1	0.40213	0.552443
337	lcl|c217737_g4_i4|m.5348	224	1	5	9	4	2	1	0	0	4	1	6	1	3	2	6	1	3	2	-0.51	-1.8462	0	0.588935	0
338	lcl|c217776_g2_i5|m.5358	259	1	1	1	0	0	1	1	2	0	0	0	1	1	0	2	2	0	0	0.184	0.4345	1	0.393983	0.554829
339	lcl|c217792_g3_i1|m.5367	165	2	1	0	1	0	1	4	1	1	1	0	0	1	0	2	0	2	0	-0.333	-0.8437	0.045963	0.67596	0.002943
340	lcl|c217808_g1_i5|m.5370	223	62	43	60	39	65	52	62	44	68	40	66	37	62	41	66	48	64	44	-0.226	-3.4295	0	0.538805	0
341	lcl|c217853_g6_i3|m.5408	319	1	2	0	0	0	0	0	1	0	2	0	0	0	1	0	1	0	2	0.36	0.8716	0.526304	0.058257	0.601391
342	lcl|c217854_g5_i1|m.5413	250	2	1	3	0	2	0	3	0	1	1	1	0	0	0	2	0	2	0	-0.459	-1.1897	0.001662	0.636875	8e-05
343	lcl|c217887_g8_i2|m.5422	214	1	1	4	2	2	1	2	0	1	0	3	0	1	1	2	0	1	0	-0.362	-0.9456	0.018996	0.663297	0.001127
344	lcl|c217937_g2_i4|m.5443	512	1	0	0	0	0	1	0	0	0	0	0	0	0	0	0	0	0	0	0.064	0.1395	1	0.615304	0.425493
345	lcl|c217972_g1_i6|m.5456	109	0	0	0	0	0	0	0	0	1	0	3	0	3	0	3	1	2	0	-0.371	-0.9348	0.020943	0.664604	0.001253
346	lcl|c217988_g6_i3|m.5463	346	12	7	13	14	19	11	19	16	18	6	14	2	16	4	17	10	14	9	-0.404	-2.8173	0	0.550504	0
347	lcl|c217990_g1_i1|m.5468	127	0	0	0	1	0	0	0	1	0	0	0	0	0	0	0	0	0	0	0.154	0.352	1	0.468916	0.528816
348	lcl|c218000_g1_i5|m.5473	256	0	0	1	0	1	1	0	0	0	1	0	0	0	1	0	0	0	0	0.069	0.1646	1	0.601822	0.440564
349	lcl|c218032_g1_i1|m.5496	550	1	2	0	3	2	5	2	4	3	3	3	5	1	3	1	3	4	4	0.71	2.5158	0	0	0.544286
350	lcl|c218119_g1_i3|m.5570	280	1	0	1	0	0	0	1	0	1	0	0	0	2	0	2	1	2	1	-0.148	-0.3491	0.701689	0.724761	0.094669
351	lcl|c218123_g3_i2|m.5572	229	5	7	6	6	3	7	6	7	6	6	6	9	7	9	7	7	3	5	0.39	2.0887	1e-06	0	0.555314
352	lcl|c218175_g5_i2|m.5596	147	0	0	1	0	0	0	1	0	0	0	0	0	0	0	0	0	1	0	0.116	0.2696	1	0.534397	0.495268
353	lcl|c218183_g4_i3|m.5602	449	2	1	1	1	1	2	2	2	2	2	1	1	2	2	2	3	2	0	0.123	0.3553	1	0.466079	0.529996
354	lcl|c218185_g1_i3|m.5606	286	0	0	3	2	0	0	2	0	0	0	1	0	0	0	1	0	0	0	-0.038	-0.0934	0.979797	0.699569	0.259317
355	lcl|c218196_g3_i9|m.5616	396	0	0	0	1	1	0	2	0	0	1	0	0	0	0	1	0	1	0	-0.013	-0.0313	0.996429	0.683565	0.306406
356	lcl|c218223_g3_i1|m.5642	343	0	1	0	2	1	4	1	1	3	6	1	6	1	3	1	4	0	2	1.017	3.0444	0	0	0.53357
357	lcl|c218302_g5_i1|m.5709	298	11	1	14	2	14	1	8	2	18	0	7	3	12	0	9	2	9	3	-1.633	-6.1513	0	0.515158	0
358	lcl|c218374_g1_i3|m.5753	544	4	1	3	3	3	3	6	3	4	3	2	2	4	2	4	1	4	2	-0.351	-1.311	0.000412	0.626081	1.8e-05
359	lcl|c218374_g4_i1|m.5754	223	15	5	11	4	12	5	12	4	10	3	12	6	11	6	12	7	13	9	-0.628	-3.543	0	0.537194	0
360	lcl|c218375_g1_i1|m.5756	193	6	8	10	6	10	7	9	9	4	4	5	10	6	8	8	10	8	7	0.202	1.2554	0.047411	0.002684	0.586208
361	lcl|c218388_g2_i3|m.5763	428	0	1	3	2	0	0	0	0	1	0	1	0	0	2	0	0	0	0	0.085	0.2143	1	0.572173	0.468152
362	lcl|c218413_g4_i1|m.5770	116	0	0	1	0	0	0	0	0	0	0	0	0	0	0	1	0	0	0	0.086	0.1901	0.999977	0.587111	0.455097
363	lcl|c218445_g1_i1|m.5788	973	1	1	0	0	0	0	1	0	0	1	0	0	1	0	0	0	1	0	0.062	0.1386	1	0.61577	0.424939
364	lcl|c218449_g2_i1|m.5791	244	1	0	0	0	0	0	0	0	0	0	0	0	1	0	0	0	0	0	0.072	0.1736	0.999975	0.596749	0.445783
365	lcl|c218481_g4_i6|m.5811	142	5	1	6	3	7	2	6	3	4	1	2	1	5	2	4	3	4	3	-0.644	-2.4468	0	0.56049	0
366	lcl|c218495_g1_i2|m.5815	121	7	5	3	2	6	3	8	10	9	7	9	4	7	3	10	9	9	8	-0.12	-0.65	0.188961	0.700623	0.014497
367	lcl|c218580_g2_i1|m.5839	166	2	0	3	3	4	1	2	2	2	0	1	3	2	1	2	3	2	2	-0.013	-0.0406	0.994794	0.68624	0.299376
368	lcl|c218603_g6_i5|m.5857	452	1	0	3	2	2	0	1	0	1	0	5	0	1	0	1	0	2	0	-0.357	-0.9405	0.019894	0.663913	0.001185
369	lcl|c218647_g3_i1|m.5884	357	0	3	3	3	1	4	3	3	3	2	6	6	5	3	4	5	2	3	0.283	1.0609	0.199733	0.014921	0.595387
370	lcl|c218666_g4_i1|m.5893	287	0	0	0	1	0	1	0	0	0	0	0	0	0	0	0	1	0	0	0.081	0.1883	0.999937	0.588184	0.454097
371	lcl|c218696_g8_i2|m.5906	146	23	11	20	11	16	12	0	0	32	17	0	0	24	19	17	13	4	4	-0.271	-2.0385	0	0.578214	0
372	lcl|c218703_g1_i4|m.5907	130	4	2	3	2	7	0	8	1	4	0	7	1	4	0	6	1	7	0	-1.286	-3.9512	0	0.532115	0
373	lcl|c218706_g7_i3|m.5908	289	1	1	1	1	0	0	3	0	0	0	0	0	0	0	1	0	0	0	-0.122	-0.2771	0.817001	0.723525	0.132754
374	lcl|c218722_g1_i2|m.5914	267	4	5	6	6	6	6	11	8	8	5	4	4	6	6	6	3	4	6	0.054	0.2905	1	0.518806	0.504539
375	lcl|c218730_g2_i11|m.5922	225	0	0	35	106	25	56	6	7	0	0	0	0	0	0	7	7	5	7	1.009	7.6553	0	0	0.513136
376	lcl|c218748_g1_i1|m.5931	114	2	2	3	4	4	2	4	3	2	2	6	3	4	3	7	4	6	2	-0.237	-0.9001	0.028477	0.668866	0.001748
377	lcl|c218755_g2_i2|m.5948	292	2	0	3	0	2	0	5	1	4	0	3	0	2	0	3	0	2	0	-0.836	-2.3534	0	0.56387	0
378	lcl|c218820_g4_i2|m.5974	322	4	0	2	1	2	0	6	0	3	0	1	0	0	0	2	0	1	0	-0.714	-1.8947	0	0.586102	0
379	lcl|c218842_g3_i2|m.5986	369	6	7	11	26	10	14	9	11	7	4	8	13	8	6	9	15	11	11	0.465	3.1619	0	0	0.531589
380	lcl|c218842_g3_i2|m.5987	117	2	5	4	8	6	8	3	3	4	5	8	9	7	9	11	10	10	8	0.346	1.9001	2.4e-05	1e-06	0.561643
381	lcl|c218852_g5_i3|m.5993	240	0	1	2	2	3	1	3	2	3	0	6	3	3	2	8	5	5	2	-0.421	-1.5402	1.9e-05	0.608715	1e-06
382	lcl|c218872_g2_i3|m.6012	254	7	10	9	6	7	8	11	12	7	7	6	15	9	21	6	14	12	17	0.572	3.999	0	0	0.52278
383	lcl|c218873_g3_i3|m.6014	160	0	0	0	0	0	0	0	0	0	0	0	1	1	2	2	1	0	1	0.128	0.3246	1	0.491858	0.518543
384	lcl|c218881_g3_i2|m.6022	212	0	0	0	0	0	0	2	0	0	0	0	0	0	1	0	1	0	0	0.01	0.0236	1	0.665705	0.347194
385	lcl|c218902_g1_i3|m.6053	198	0	0	0	0	1	0	1	0	0	0	0	2	0	0	0	0	0	0	0.177	0.4461	1	0.3829	0.557935
386	lcl|c218903_g1_i1|m.6054	394	0	0	1	0	1	0	0	1	1	0	1	0	0	0	0	0	1	0	0.116	0.2535	1	0.545919	0.487764
387	lcl|c218968_g13_i5|m.6107	382	0	0	2	6	1	8	1	2	0	6	1	4	0	3	1	5	0	9	1.509	4.6671	0	0	0.518981
388	lcl|c219090_g4_i2|m.6185	192	0	5	2	2	3	2	1	4	1	5	1	6	1	5	2	7	2	1	1.038	3.672	0	0	0.525584
389	lcl|c219160_g4_i1|m.6235	367	0	1	1	0	0	0	0	0	0	0	0	1	0	0	1	0	0	2	0.179	0.4418	1	0.38702	0.556799
390	lcl|c219163_g1_i3|m.6242	210	0	0	1	0	0	0	2	0	0	0	1	0	2	1	1	2	2	1	-0.055	-0.1362	0.958838	0.708145	0.227283
391	lcl|c219184_g1_i2|m.6256	101	0	0	0	0	0	1	0	0	0	0	0	1	0	0	0	0	0	0	0.113	0.2617	1	0.540105	0.491626
392	lcl|c219184_g2_i2|m.6257	146	1	0	1	0	1	0	1	0	1	0	1	0	0	0	1	0	0	0	0.097	0.2368	1	0.557416	0.479642
393	lcl|c219187_g1_i1|m.6258	377	1	1	1	1	0	0	1	2	0	1	0	3	0	1	0	2	0	1	0.429	1.0381	0.23009	0.017868	0.596377
394	lcl|c219220_g4_i4|m.6283	542	1	0	0	0	1	0	1	2	0	0	1	0	0	0	1	0	0	0	0.173	0.4038	1	0.422755	0.545974
395	lcl|c219237_g2_i4|m.6297	449	0	1	0	1	1	1	1	1	1	0	0	0	0	0	0	0	0	0	0.09	0.2104	1	0.574645	0.466097
396	lcl|c219274_g1_i6|m.6313	198	1	0	0	1	1	0	1	0	0	2	0	1	1	1	1	2	1	1	0.27	0.6382	0.919714	0.201225	0.592521
397	lcl|c219327_g1_i2|m.6330	217	2	1	2	1	3	2	3	2	2	2	4	1	3	1	2	2	3	1	-0.425	-1.2687	0.000681	0.629686	3.1e-05
398	lcl|c219457_g2_i7|m.6385	322	0	0	0	0	0	0	0	0	0	0	0	0	1	0	0	0	1	0	0.071	0.1559	1	0.606606	0.435424
399	lcl|c219462_g5_i7|m.6389	243	2	1	5	1	4	0	3	3	2	1	3	2	1	0	3	2	1	1	-0.438	-1.3066	0.000434	0.626449	1.9e-05
400	lcl|c219473_g3_i1|m.6396	959	0	0	0	0	0	0	1	0	0	0	0	0	0	0	0	1	1	0	0.069	0.1706	0.999873	0.598454	0.444054
401	lcl|c219485_g5_i3|m.6399	204	0	1	2	1	1	1	0	2	0	1	2	1	1	0	0	1	2	1	-0.039	-0.1004	0.97697	0.701105	0.25403
402	lcl|c219495_g3_i10|m.6406	371	0	0	1	0	0	0	1	0	1	0	4	0	1	0	2	0	2	0	-0.314	-0.7765	0.078382	0.684581	0.005293
403	lcl|c219506_g5_i1|m.6423	245	9	6	8	5	11	6	20	6	15	6	14	9	14	6	13	10	17	10	-0.456	-3.0499	0	0.54567	0
404	lcl|c219546_g2_i1|m.6439	265	20	11	24	10	25	10	33	11	20	8	26	8	23	8	31	16	30	9	-0.774	-6.1146	0	0.515313	0
405	lcl|c219556_g4_i5|m.6447	320	0	1	3	1	1	1	4	2	4	1	2	1	2	0	0	2	5	1	-0.524	-1.494	3.8e-05	0.61199	1e-06
406	lcl|c219560_g3_i6|m.6452	532	0	0	1	0	0	0	1	0	1	0	2	0	0	0	1	0	0	0	-0.052	-0.1186	0.968539	0.704854	0.240359
407	lcl|c219563_g5_i1|m.6455	161	2	0	2	0	2	2	2	2	3	4	2	2	2	2	2	4	2	2	0.204	0.6521	0.90465	0.189569	0.593902
408	lcl|c219564_g8_i2|m.6456	156	0	0	1	1	0	0	2	1	1	0	3	0	2	0	0	0	4	1	-0.404	-0.9786	0.014024	0.659367	0.000812
409	lcl|c219583_g2_i1|m.6468	249	3	5	5	3	3	2	4	4	5	4	2	3	2	2	1	1	2	1	0.074	0.2665	1	0.53665	0.493848
410	lcl|c219601_g1_i1|m.6471	429	23	18	22	13	24	20	24	19	26	18	38	24	31	20	34	21	22	17	-0.203	-1.9882	0	0.580885	0
411	lcl|c219632_g2_i1|m.6493	441	0	2	1	0	1	0	1	1	0	0	0	0	2	3	0	0	0	0	0.247	0.6132	0.943289	0.223003	0.589693
412	lcl|c219636_g2_i1|m.6494	168	1	0	3	1	1	0	1	0	2	0	2	0	1	0	1	0	1	0	-0.215	-0.5235	0.377102	0.714669	0.034917
413	lcl|c219636_g2_i3|m.6495	144	3	0	2	1	1	2	3	1	2	1	2	2	6	2	3	1	5	2	-0.55	-1.6827	2e-06	0.599106	0
414	lcl|c219662_g1_i2|m.6507	250	28	27	35	24	34	29	38	30	36	25	37	31	39	25	35	37	33	26	-0.053	-0.6882	0.147587	0.695878	0.010839
415	lcl|c219703_g2_i4|m.6532	149	0	0	0	0	0	0	0	0	0	1	0	0	0	2	0	0	0	0	0.206	0.4928	1	0.337533	0.569193
416	lcl|c219704_g3_i2|m.6534	624	0	1	0	0	0	1	1	0	1	0	0	0	0	1	0	0	0	0	0.053	0.1187	1	0.625748	0.412452
417	lcl|c219710_g2_i1|m.6538	329	8	7	17	9	11	6	16	6	8	4	11	5	9	6	8	1	14	6	-0.548	-3.2511	0	0.541774	0
418	lcl|c219733_g1_i1|m.6543	217	0	2	1	7	0	3	2	4	0	4	0	4	0	4	0	2	0	3	1.251	3.8001	0	0	0.524392
419	lcl|c219733_g1_i5|m.6547	208	0	5	2	11	2	6	2	6	0	8	0	10	0	8	0	2	0	5	1.67	6.1805	0	0	0.514418
420	lcl|c219759_g3_i3|m.6556	148	2	3	3	2	1	2	1	2	2	1	2	3	1	1	3	4	3	3	0.293	0.9068	0.455782	0.046295	0.600794
421	lcl|c219763_g5_i3|m.6564	216	2	0	2	0	1	1	1	0	2	1	0	0	1	0	0	0	0	0	-0.171	-0.4206	0.569361	0.722484	0.064838
422	lcl|c219817_g1_i3|m.6593	509	1	1	0	0	0	0	0	0	1	0	0	0	0	1	0	0	0	0	0.047	0.1108	1	0.629544	0.40737
423	lcl|c219828_g4_i5|m.6597	249	0	1	0	0	0	0	0	0	0	1	0	1	0	2	0	0	0	0	0.173	0.4241	1	0.403828	0.551934
424	lcl|c219829_g2_i1|m.6600	268	0	0	0	0	0	0	0	0	0	0	0	0	0	0	0	0	1	1	0.113	0.2704	1	0.533814	0.495633
425	lcl|c219842_g1_i1|m.6611	344	1	2	2	3	3	3	2	3	1	2	2	4	2	0	1	1	1	0	0.412	1.3525	0.020299	0.001012	0.581794
426	lcl|c219870_g5_i1|m.6620	116	6	2	3	2	3	2	2	2	6	2	2	0	5	1	4	5	3	2	-0.417	-1.4668	5.5e-05	0.613962	2e-06
427	lcl|c219883_g1_i2|m.6624	445	48	34	50	28	59	25	57	30	50	16	56	20	50	21	65	32	61	32	-0.572	-7.2746	0	0.512911	0
428	lcl|c219885_g1_i1|m.6625	348	0	0	0	0	1	1	1	0	0	1	0	0	0	0	1	0	1	0	0.062	0.1406	1	0.614734	0.426169
429	lcl|c219901_g4_i1|m.6631	347	0	2	2	3	0	2	0	1	0	2	1	3	1	3	0	1	1	3	0.718	2.0998	1e-06	0	0.554966
430	lcl|c219950_g4_i1|m.6653	411	0	1	0	1	1	0	2	1	1	1	0	1	0	0	0	1	1	1	-0.017	-0.0377	0.995298	0.685416	0.30157
431	lcl|c219953_g4_i2|m.6660	228	2	1	3	1	2	1	4	2	4	2	2	2	3	0	2	2	3	1	-0.463	-1.4144	0.000111	0.617865	5e-06
432	lcl|c220008_g2_i5|m.6705	174	1	1	0	1	1	2	0	1	0	2	2	1	1	3	2	2	2	2	0.355	0.9805	0.319454	0.027629	0.598643
433	lcl|c220011_g4_i9|m.6707	263	0	1	0	1	0	1	1	1	0	1	1	1	0	1	0	0	1	1	0.087	0.2084	1	0.575904	0.465036
434	lcl|c220050_g2_i1|m.6739	258	0	2	0	1	2	1	1	1	1	2	1	1	0	1	0	2	2	1	0.179	0.4536	1	0.375686	0.559876
435	lcl|c220103_g1_i1|m.6751	446	0	0	2	2	1	1	2	2	0	1	0	3	0	0	0	0	0	0	0.223	0.6076	0.948145	0.228015	0.588997
436	lcl|c220191_g1_i1|m.6799	459	0	0	1	2	1	0	0	0	0	0	0	0	1	0	0	0	0	0	0.181	0.4216	1	0.40618	0.551222
437	lcl|c220226_g2_i9|m.6827	984	0	1	0	0	1	0	0	0	0	0	1	0	0	0	0	0	0	0	0.065	0.1456	1	0.612118	0.429224
438	lcl|c220230_g1_i10|m.6831	269	0	0	0	0	0	0	0	0	0	1	0	0	0	1	0	0	0	3	0.27	0.6532	0.903392	0.188661	0.594006
439	lcl|c220252_g1_i3|m.6839	322	1	1	3	1	2	1	5	0	0	0	3	3	3	1	3	1	4	1	-0.637	-1.7844	0	0.592669	0
440	lcl|c220300_g3_i1|m.6859	160	8	8	20	9	15	11	24	12	16	9	22	18	19	11	16	18	21	14	-0.203	-1.6443	4e-06	0.601628	0
441	lcl|c220319_g5_i1|m.6862	361	1	1	2	1	2	0	1	1	0	0	1	1	2	0	0	1	1	1	-0.151	-0.3728	0.659234	0.724355	0.083902
442	lcl|c220360_g1_i11|m.6899	305	1	0	0	0	0	0	0	1	1	0	0	0	2	0	1	0	1	0	-0.003	-0.0063	0.999537	0.675874	0.325166
443	lcl|c220380_g1_i3|m.6911	129	0	0	0	2	0	0	0	0	0	0	0	0	0	0	0	0	0	2	0.307	0.741	0.77789	0.12401	0.599827
444	lcl|c220464_g2_i2|m.6955	118	0	2	1	0	1	2	2	0	2	1	1	1	2	1	2	0	1	1	-0.051	-0.1332	0.960593	0.707607	0.2295
445	lcl|c220475_g1_i1|m.6962	433	2	2	3	0	2	0	7	3	2	0	1	1	3	1	4	2	4	1	-0.602	-1.8375	0	0.589452	0
446	lcl|c220485_g3_i1|m.6974	107	0	0	0	0	0	0	0	0	0	0	6	5	0	0	4	5	0	0	0.137	0.4313	1	0.397021	0.553949
447	lcl|c220575_g2_i3|m.7010	119	0	0	0	0	0	0	0	0	0	0	1	0	0	1	0	0	0	0	0.118	0.2749	1	0.530512	0.497669
448	lcl|c220622_g1_i1|m.7032	311	20	13	24	21	17	17	16	13	25	11	14	18	27	15	16	11	27	19	-0.125	-1.1043	0.004103	0.64539	0.000214
449	lcl|c220637_g4_i1|m.7052	160	0	1	0	1	0	0	0	0	1	0	2	0	1	0	0	0	1	0	-0.004	-0.0089	0.999342	0.676709	0.323227
450	lcl|c220638_g5_i1|m.7054	125	0	0	1	0	1	0	0	0	0	0	2	1	1	2	3	0	2	0	-0.104	-0.2645	0.834481	0.722888	0.140222
451	lcl|c220639_g4_i8|m.7062	350	0	1	0	1	0	0	0	1	0	0	0	0	0	1	0	1	0	0	0.1	0.2426	1	0.553475	0.482501
452	lcl|c220640_g5_i2|m.7065	483	16	18	18	14	15	17	23	24	18	16	25	21	20	12	25	20	23	29	0.09	0.8377	0.594811	0.071936	0.60162
453	lcl|c220656_g4_i1|m.7074	339	1	1	0	0	0	1	1	0	0	0	0	0	1	2	1	0	2	0	0.092	0.2111	1	0.574203	0.466467
454	lcl|c220657_g1_i4|m.7075	363	0	0	0	0	1	0	1	0	1	0	2	0	2	1	2	0	2	0	-0.228	-0.5447	0.340636	0.712573	0.030408
455	lcl|c220657_g1_i5|m.7076	293	0	0	0	0	1	0	0	0	1	0	1	0	1	1	2	0	2	0	-0.094	-0.221	0.887667	0.719627	0.167678
456	lcl|c220695_g1_i1|m.7091	652	2	1	3	1	4	2	3	3	1	1	3	0	3	1	1	1	4	0	-0.512	-1.5126	2.9e-05	0.610661	1e-06
457	lcl|c220736_g3_i1|m.7111	208	6	3	5	2	3	5	5	6	5	7	4	3	4	5	5	6	5	4	0.127	0.5959	0.957336	0.238625	0.587466
458	lcl|c220748_g5_i2|m.7116	472	16	16	27	15	17	7	23	17	23	6	20	20	33	13	27	18	25	21	-0.3	-2.6936	0	0.553355	0
459	lcl|c220806_g2_i3|m.7164	184	9	6	12	8	8	8	10	10	10	3	11	6	8	5	9	7	8	6	-0.188	-1.1278	0.003218	0.642967	0.000164
460	lcl|c220808_g2_i6|m.7171	473	1	2	3	1	1	1	2	1	2	0	3	0	2	0	3	2	4	1	-0.467	-1.2909	0.000524	0.627775	2.3e-05
461	lcl|c220831_g1_i1|m.7185	356	0	1	2	1	0	0	2	0	0	0	1	0	4	0	0	0	1	0	-0.306	-0.7922	0.069455	0.682559	0.00463
462	lcl|c220834_g8_i2|m.7193	216	0	0	0	0	1	0	0	0	1	0	0	1	2	0	1	0	0	0	0.006	0.013	1	0.669432	0.339448
463	lcl|c220845_g6_i1|m.7197	209	0	0	0	0	1	1	0	0	0	0	2	1	1	0	1	0	0	1	-0.016	-0.0363	0.995524	0.685015	0.302629
464	lcl|c220863_g2_i3|m.7207	295	1	0	2	0	1	0	1	1	0	0	1	0	1	1	0	2	1	2	0.139	0.3506	1	0.470114	0.528311
465	lcl|c220897_g5_i4|m.7224	196	1	0	2	2	4	2	1	1	2	0	2	0	1	1	2	0	1	1	-0.216	-0.5542	0.32484	0.711592	0.028547
466	lcl|c220923_g2_i4|m.7240	887	0	0	0	0	1	0	0	1	1	0	0	0	0	0	3	0	3	0	-0.241	-0.5904	0.268293	0.707652	0.022292
467	lcl|c220936_g1_i1|m.7247	118	0	0	1	0	1	0	1	1	1	0	1	1	1	0	1	1	1	0	0.129	0.3018	1	0.510079	0.509332
468	lcl|c220937_g5_i7|m.7248	281	1	1	2	2	2	1	3	2	1	1	2	0	1	1	0	1	0	1	-0.097	-0.2515	0.851572	0.722089	0.148162
469	lcl|c220945_g4_i2|m.7256	501	0	1	1	0	2	0	2	1	1	0	0	0	0	1	0	0	2	0	-0.177	-0.4202	0.57013	0.722505	0.064983
470	lcl|c220954_g1_i2|m.7267	290	36	45	176	290	79	98	9	13	46	47	24	49	40	66	22	29	30	48	0.565	9.6679	0	0	0.511765
471	lcl|c220963_g1_i1|m.7276	189	1	0	3	0	1	0	3	0	2	0	5	2	3	1	4	0	4	0	-0.755	-2.056	0	0.577307	0
472	lcl|c220977_g2_i3|m.7288	378	1	0	1	2	2	0	2	0	0	0	0	0	0	0	0	0	0	0	-0.009	-0.0233	0.997599	0.681184	0.312435
473	lcl|c221039_g1_i2|m.7339	216	6	4	5	2	6	6	8	2	7	4	11	5	8	6	10	5	8	5	-0.398	-2.0869	0	0.575735	0
474	lcl|c221039_g3_i2|m.7343	241	0	0	0	0	0	0	1	0	0	0	1	2	0	1	2	1	1	0	0.099	0.2366	1	0.557551	0.479542
475	lcl|c221054_g2_i1|m.7350	470	0	0	0	1	0	0	0	0	0	0	0	0	0	0	0	0	1	0	0.086	0.1881	0.999931	0.588303	0.453985
476	lcl|c221061_g4_i1|m.7355	581	1	2	0	0	0	1	1	1	0	0	0	1	1	1	1	1	1	2	0.27	0.6224	0.935177	0.214874	0.590786
477	lcl|c221077_g1_i1|m.7374	256	0	0	0	0	2	0	2	1	0	0	1	0	2	0	1	0	2	0	-0.251	-0.6308	0.212539	0.702946	0.016704
478	lcl|c221101_g1_i2|m.7397	354	0	0	1	1	0	0	0	1	1	0	0	0	0	1	0	1	1	0	0.021	0.0464	1	0.657221	0.363581
479	lcl|c221114_g2_i1|m.7405	169	4	0	1	0	2	0	4	0	0	0	5	1	1	1	3	1	4	0	-0.814	-2.1853	0	0.570987	0
480	lcl|c221130_g3_i2|m.7408	117	4	0	3	0	3	1	2	1	4	2	5	1	3	1	4	0	5	1	-0.985	-2.8508	0	0.54978	0
481	lcl|c221189_g3_i1|m.7459	154	1	0	1	0	1	0	1	0	0	0	1	0	0	0	1	0	1	0	0.064	0.1428	1	0.613588	0.427517
482	lcl|c221194_g2_i1|m.7463	565	1	1	5	1	4	1	2	0	1	1	1	0	1	0	2	0	0	0	-0.497	-1.3205	0.000367	0.625293	1.6e-05
483	lcl|c221198_g6_i3|m.7467	335	0	0	1	1	0	1	0	1	0	0	0	0	0	1	0	0	0	0	0.077	0.174	0.999982	0.596521	0.446013
484	lcl|c221205_g1_i1|m.7472	112	0	1	2	1	2	0	2	0	0	0	3	1	0	1	3	1	2	2	-0.362	-0.9356	0.020793	0.664507	0.001243
485	lcl|c221225_g1_i1|m.7492	247	7	5	7	6	6	4	9	8	7	4	8	9	11	9	12	8	9	4	-0.136	-0.8177	0.056786	0.679282	0.003709
486	lcl|c221236_g6_i3|m.7501	195	1	0	2	1	1	0	1	1	1	1	2	1	1	1	1	1	3	0	-0.209	-0.5039	0.412213	0.716481	0.03955
487	lcl|c221238_g1_i4|m.7502	121	2	8	5	8	7	9	6	6	6	6	3	7	6	6	4	5	9	6	0.428	2.3158	0	0	0.548924
488	lcl|c221244_g1_i4|m.7506	140	0	0	0	0	1	1	1	1	0	0	0	0	0	0	1	2	1	1	0.185	0.4445	1	0.384435	0.557515
489	lcl|c221246_g1_i5|m.7511	385	0	0	0	1	0	0	0	0	0	1	0	0	0	0	0	0	0	1	0.09	0.2164	1	0.570832	0.469251
490	lcl|c221253_g7_i1|m.7518	403	1	1	0	1	1	0	2	0	0	2	0	0	0	0	0	1	0	0	0.109	0.2534	1	0.545989	0.487716
491	lcl|c221281_g1_i1|m.7530	260	1	2	1	1	0	2	3	1	1	2	0	1	1	2	1	1	1	2	0.321	0.8424	0.58545	0.069906	0.601611
492	lcl|c221281_g1_i1|m.7531	183	3	3	7	1	5	3	9	1	4	4	6	7	6	5	5	8	6	8	-0.069	-0.3247	0.743446	0.724778	0.106678
493	lcl|c221296_g1_i3|m.7550	157	21	16	30	36	25	26	33	18	33	19	19	13	24	22	22	23	24	44	0.119	1.2642	0.044049	0.002465	0.585796
494	lcl|c221301_g3_i3|m.7552	150	0	1	0	0	0	0	0	0	0	0	1	0	0	1	0	1	0	0	0.121	0.2764	1	0.529404	0.498343
495	lcl|c221337_g4_i1|m.7577	447	0	0	0	0	1	0	0	0	0	0	0	0	0	0	0	0	0	1	0.128	0.3	1	0.511482	0.508579
496	lcl|c221340_g4_i1|m.7579	515	1	1	3	2	4	1	6	1	3	2	2	1	2	0	3	1	3	0	-0.684	-2.0335	0	0.578475	0
497	lcl|c221356_g3_i2|m.7588	707	4	2	18	4	4	2	12	2	6	2	16	5	3	2	12	3	12	3	-1.063	-4.8795	0	0.521428	0
498	lcl|c221374_g4_i3|m.7595	283	0	2	0	0	1	0	1	2	2	0	0	0	1	0	1	2	1	0	0.252	0.6295	0.928267	0.208689	0.591588
499	lcl|c221427_g1_i4|m.7617	479	1	0	0	1	0	1	1	1	0	1	0	0	0	0	0	1	3	1	-0.096	-0.2405	0.86532	0.721297	0.155062
500	lcl|c221439_g3_i7|m.7630	335	0	1	0	0	0	1	0	1	0	1	0	1	0	1	0	1	0	0	0.07	0.1535	1	0.607905	0.433991
501	lcl|c221440_g2_i5|m.7632	362	1	1	1	1	1	2	2	2	3	2	2	0	2	0	1	0	2	0	-0.088	-0.2403	0.865556	0.721282	0.155189
502	lcl|c221441_g1_i5|m.7633	559	3	3	4	5	4	2	3	2	4	1	4	4	5	7	3	2	7	4	-0.055	-0.2063	0.903059	0.718137	0.177497
503	lcl|c221444_g1_i1|m.7638	398	0	0	1	1	0	0	0	0	0	0	0	0	0	0	0	0	0	0	0.093	0.2072	1	0.576656	0.464397
504	lcl|c221450_g9_i6|m.7639	488	1	2	1	2	1	3	1	0	0	0	1	5	1	0	1	2	2	4	0.769	2.0692	2e-06	0	0.555934
505	lcl|c221461_g2_i7|m.7655	295	0	0	1	0	0	0	0	1	0	0	1	0	1	1	0	1	0	1	0.103	0.2368	1	0.557416	0.479642
506	lcl|c221482_g1_i3|m.7664	468	2	2	2	1	2	0	2	1	2	1	3	1	1	1	1	0	1	0	-0.318	-0.8134	0.058774	0.679834	0.003852
507	lcl|c221495_g1_i4|m.7674	312	0	0	0	0	0	0	0	0	0	0	0	0	1	0	0	0	1	0	0.125	0.2929	1	0.516969	0.50557
508	lcl|c221497_g1_i2|m.7677	265	0	0	1	0	0	0	1	1	0	0	0	0	0	1	0	1	0	2	0.173	0.3958	1	0.430098	0.54351
509	lcl|c221514_g6_i1|m.7698	249	2	0	2	0	0	1	1	0	1	1	1	0	1	1	1	1	2	0	-0.179	-0.4478	0.517356	0.720867	0.055521
510	lcl|c221524_g4_i2|m.7708	280	1	1	0	0	36	19	3	2	1	0	2	1	1	0	24	21	3	3	-0.159	-0.8211	0.055256	0.678846	0.0036
511	lcl|c221524_g4_i5|m.7709	330	1	1	0	0	23	12	3	2	1	0	2	1	1	0	21	14	3	3	-0.27	-1.3013	0.000463	0.626894	2e-05
512	lcl|c221532_g1_i2|m.7711	201	0	0	0	0	0	0	1	0	0	0	0	0	0	0	1	0	0	0	0.141	0.3288	1	0.488413	0.520173
513	lcl|c221583_g3_i2|m.7741	426	9	8	9	15	16	7	16	8	11	6	18	8	13	7	19	12	18	12	-0.273	-1.8949	0	0.58609	0
514	lcl|c221586_g4_i2|m.7745	286	1	1	5	4	3	1	3	1	4	1	3	1	4	2	3	1	5	2	-0.586	-1.8618	0	0.588014	0
515	lcl|c221593_g3_i1|m.7753	194	8	7	7	7	6	7	9	5	8	4	7	6	10	8	7	11	10	8	0.027	0.1565	1	0.60628	0.435782
516	lcl|c221608_g1_i1|m.7755	596	8	9	3	3	7	7	13	15	6	10	7	18	12	14	9	21	9	15	0.581	3.9435	0	0	0.523194
517	lcl|c221613_g3_i1|m.7758	257	1	4	3	3	3	1	1	2	4	3	1	3	2	4	3	4	2	2	0.392	1.4172	0.011004	0.000506	0.579056
518	lcl|c221619_g2_i1|m.7763	143	2	1	5	3	1	1	6	1	4	0	5	3	5	4	3	1	2	4	-0.367	-1.3097	0.000418	0.62619	1.8e-05
519	lcl|c221649_g6_i2|m.7773	137	0	0	0	0	0	0	1	0	0	0	0	0	1	1	0	1	1	0	0.079	0.1723	0.99994	0.59749	0.445035
520	lcl|c221662_g2_i4|m.7775	226	6	6	7	6	4	7	5	7	5	7	4	7	7	7	2	5	6	6	0.381	2.0667	2e-06	0	0.556014
521	lcl|c221666_g1_i3|m.7779	150	0	2	0	3	1	4	0	1	0	1	0	3	0	0	0	0	0	2	0.731	1.934	1.5e-05	1e-06	0.560465
522	lcl|c221672_g4_i6|m.7784	412	1	0	2	2	1	0	2	1	1	0	2	0	0	0	3	0	2	1	-0.268	-0.6906	0.145235	0.695576	0.010639
523	lcl|c221676_g4_i4|m.7786	321	11	5	8	7	7	7	8	4	11	7	8	4	8	6	9	5	12	7	-0.28	-1.5337	2.1e-05	0.609171	1e-06
524	lcl|c221694_g2_i1|m.7797	309	0	1	0	0	0	2	0	4	0	0	0	4	0	5	0	6	2	4	1.044	3.2089	0	0	0.530872
525	lcl|c221711_g1_i1|m.7807	106	0	1	0	1	0	0	0	1	0	1	0	1	0	0	0	1	0	0	0.153	0.3413	1	0.478005	0.524906
526	lcl|c221736_g1_i11|m.7820	145	10	6	10	6	4	3	13	3	14	3	7	3	12	4	16	7	12	9	-0.641	-3.4709	0	0.538196	0
527	lcl|c221753_g3_i7|m.7844	359	9	5	12	5	8	4	8	4	9	1	12	0	10	0	15	3	7	3	-1.035	-4.9668	0	0.520638	0
528	lcl|c221802_g2_i1|m.7868	342	0	1	1	1	1	1	1	1	3	1	1	1	1	1	1	1	1	2	0.066	0.1571	1	0.605954	0.436139
529	lcl|c221840_g3_i2|m.7908	461	1	1	2	1	2	1	4	1	3	3	0	0	4	1	0	2	3	1	-0.363	-1.0281	0.008763	0.653665	0.000487
530	lcl|c221840_g3_i5|m.7911	286	0	0	3	1	2	2	3	1	4	1	1	2	5	0	1	3	2	3	-0.199	-0.6165	0.231334	0.704643	0.018528
531	lcl|c221844_g2_i1|m.7916	122	0	0	0	0	0	0	0	0	0	1	0	0	0	0	0	1	0	0	0.098	0.235	1	0.558628	0.478746
532	lcl|c221849_g1_i2|m.7917	214	1	1	1	0	2	1	0	1	1	0	1	1	2	1	2	1	3	1	-0.219	-0.56	0.315401	0.710981	0.027457
533	lcl|c221855_g2_i3|m.7925	314	4	4	7	5	3	2	4	1	5	1	4	2	5	1	3	2	7	4	-0.472	-1.8161	0	0.590736	0
534	lcl|c221860_g1_i4|m.7929	195	0	0	0	0	1	0	0	0	0	0	0	1	1	0	1	0	0	0	0.066	0.1485	1	0.610583	0.430983
535	lcl|c221883_g2_i12|m.7953	683	10	28	9	24	16	20	20	27	9	20	8	25	11	14	14	25	27	33	0.719	6.4459	0	0	0.513975
536	lcl|c221890_g1_i1|m.7971	375	0	0	0	0	1	0	2	0	0	0	0	0	0	0	0	0	1	0	-0.006	-0.0154	0.998666	0.67876	0.318366
537	lcl|c221925_g1_i3|m.7988	563	36	28	58	37	45	25	50	28	40	25	58	36	48	33	52	40	67	38	-0.282	-4.0114	0	0.531401	0
538	lcl|c221967_g2_i3|m.8016	272	1	1	1	1	0	1	0	0	0	0	1	2	1	0	2	1	0	0	0.086	0.2246	1	0.565521	0.47349
539	lcl|c221968_g1_i1|m.8017	625	0	0	0	0	0	0	0	0	0	0	1	0	0	0	1	0	0	0	0.064	0.1467	1	0.611538	0.429893
540	lcl|c221971_g3_i2|m.8022	412	0	0	1	0	1	0	0	0	0	0	0	0	0	0	0	0	0	0	0.088	0.1973	0.999854	0.582766	0.459056
541	lcl|c221999_g1_i4|m.8036	613	0	0	1	0	0	1	0	0	0	0	0	0	0	0	0	0	0	0	0.067	0.1448	1	0.61254	0.428738
542	lcl|c222067_g2_i1|m.8074	416	1	0	1	0	1	0	1	0	1	1	0	0	0	0	0	0	0	0	0.055	0.1235	1	0.623395	0.415504
543	lcl|c222117_g4_i1|m.8104	330	0	0	0	0	1	0	0	1	1	0	2	0	1	0	0	0	2	0	-0.074	-0.1825	0.925269	0.715289	0.193899
544	lcl|c222123_g3_i1|m.8109	442	0	0	1	1	1	0	2	0	0	0	1	0	1	0	0	0	1	0	-0.019	-0.045	0.993933	0.68747	0.296042
545	lcl|c222140_g4_i1|m.8123	1085	0	0	0	1	0	1	0	1	0	0	0	0	0	0	0	1	0	1	0.042	0.0962	1	0.636323	0.397804
546	lcl|c222155_g2_i2|m.8140	158	0	1	0	1	0	0	0	7	0	6	0	3	0	0	0	9	0	4	1.356	4.0707	0	0	0.522286
547	lcl|c222186_g2_i2|m.8151	221	3	3	3	4	5	3	6	3	7	4	5	2	3	2	7	2	5	1	-0.407	-1.654	4e-06	0.600987	0
548	lcl|c222187_g6_i1|m.8152	419	0	0	0	0	0	0	1	0	1	0	0	0	0	0	0	0	1	0	0.073	0.166	1	0.601041	0.441382
549	lcl|c222196_g3_i1|m.8162	140	0	1	2	1	1	1	1	1	2	1	2	1	1	0	2	1	1	1	-0.204	-0.5131	0.395553	0.715646	0.037318
550	lcl|c222197_g1_i5|m.8163	375	0	1	1	1	2	0	0	1	1	0	1	0	1	0	1	0	2	0	-0.052	-0.1219	0.966847	0.705496	0.237895
551	lcl|c222200_g1_i1|m.8165	150	0	0	0	0	0	0	0	1	0	0	0	1	0	1	0	1	0	1	0.097	0.2252	1	0.565128	0.473797
552	lcl|c222208_g5_i7|m.8170	516	1	4	3	2	4	5	5	4	1	2	4	4	3	7	1	3	2	3	0.481	1.7849	0.000131	5e-06	0.565676
553	lcl|c222210_g1_i4|m.8175	409	0	0	0	0	0	0	0	0	0	0	1	1	0	0	0	0	0	0	0.111	0.2461	1	0.551071	0.484207
554	lcl|c222225_g1_i1|m.8189	377	0	0	1	1	0	0	1	1	1	0	0	0	0	0	0	0	0	0	0.058	0.1343	1	0.617977	0.42228
555	lcl|c222259_g2_i10|m.8212	511	0	0	0	0	0	0	1	2	0	1	0	1	0	0	0	0	0	0	0.178	0.3957	1	0.430189	0.543479
556	lcl|c222286_g2_i1|m.8232	302	0	1	2	0	1	1	0	0	0	0	0	0	0	1	0	0	0	0	-0.002	-0.0055	0.999598	0.675616	0.325762
557	lcl|c222306_g8_i4|m.8236	192	10	8	13	10	13	3	11	4	12	0	14	2	10	4	10	2	16	3	-0.917	-4.9138	0	0.521101	0
558	lcl|c222306_g9_i1|m.8237	246	11	3	6	6	21	6	23	8	6	5	16	9	7	4	21	10	19	5	-0.66	-4.0283	0	0.531203	0
559	lcl|c222319_g4_i3|m.8243	103	5	0	5	0	0	1	1	1	3	0	0	1	2	0	3	0	1	0	-0.728	-1.9298	0	0.584105	0
560	lcl|c222323_g2_i2|m.8244	420	0	0	0	0	0	0	1	0	0	0	0	0	1	0	0	0	1	0	0.054	0.1212	1	0.624526	0.414045
561	lcl|c222323_g2_i2|m.8245	289	0	1	2	0	2	0	2	2	1	1	2	1	1	1	2	0	1	1	-0.186	-0.4495	0.514082	0.720753	0.054974
562	lcl|c222343_g4_i1|m.8262	324	2	5	1	1	5	3	5	2	5	10	6	10	7	6	3	6	2	4	0.423	1.9244	1.7e-05	1e-06	0.560797
563	lcl|c222353_g1_i1|m.8273	474	0	0	0	0	0	1	0	2	0	3	0	2	0	3	0	0	0	0	0.565	1.4624	0.006994	0.000305	0.577243
564	lcl|c222355_g2_i4|m.8274	160	2	2	2	1	2	2	1	2	0	1	1	1	0	0	0	0	1	1	0.112	0.2923	1	0.517429	0.505313
565	lcl|c222377_g6_i1|m.8283	384	1	0	1	0	0	0	0	0	1	0	0	0	0	2	0	0	1	0	0.18	0.4435	1	0.385393	0.55725
566	lcl|c222386_g1_i1|m.8298	326	0	0	1	2	0	0	0	0	3	4	3	4	3	4	6	1	0	0	0.097	0.3161	1	0.498745	0.51518
567	lcl|c222399_g1_i2|m.8304	195	7	9	10	12	5	15	14	14	7	15	6	20	13	17	8	15	8	16	0.695	5.0803	0	0	0.517343
568	lcl|c222400_g6_i5|m.8305	398	1	0	0	0	0	1	1	0	1	0	0	0	1	0	0	0	0	0	0.115	0.2527	1	0.546481	0.487382
569	lcl|c222419_g1_i2|m.8314	183	5	10	5	10	7	11	8	12	5	8	9	11	5	6	8	13	5	9	0.607	3.5571	0	0	0.526715
570	lcl|c222419_g1_i6|m.8316	190	5	10	5	10	6	11	8	13	6	8	10	11	6	6	8	15	5	9	0.61	3.7291	0	0	0.525042
571	lcl|c222433_g3_i2|m.8329	204	0	0	3	0	1	0	0	0	1	0	0	0	1	0	2	0	0	0	-0.111	-0.2618	0.838102	0.722734	0.141851
572	lcl|c222436_g10_i1|m.8337	119	0	0	1	0	0	0	1	0	1	0	1	1	0	0	1	1	1	0	0.081	0.1844	0.999756	0.590489	0.451916
573	lcl|c222437_g1_i2|m.8353	210	26	11	25	6	57	13	50	14	45	15	57	18	52	31	88	34	82	29	-0.857	-10.0102	0	0.511028	0
574	lcl|c222451_g1_i1|m.8369	185	1	1	3	1	3	2	4	4	2	1	3	0	1	2	2	4	3	2	-0.056	-0.1798	0.927534	0.714931	0.195796
575	lcl|c222459_g5_i1|m.8379	326	4	6	19	8	13	4	16	8	15	2	7	3	8	1	16	3	12	5	-0.825	-4.5968	0	0.524708	0
576	lcl|c222484_g2_i1|m.8393	262	8	8	10	9	6	11	14	4	6	4	9	9	7	8	10	7	9	7	-0.013	-0.0795	0.984775	0.69636	0.269849
577	lcl|c222526_g1_i2|m.8408	491	2	3	2	2	1	1	3	1	2	1	1	2	1	1	0	2	1	1	0.084	0.2319	1	0.560702	0.477193
578	lcl|c222542_g3_i2|m.8415	198	2	1	0	1	1	0	1	1	0	0	1	0	2	2	0	0	2	1	-0.064	-0.1584	0.944214	0.711841	0.211065
579	lcl|c222543_g3_i2|m.8418	235	0	0	0	0	0	0	32	26	0	0	0	0	0	0	0	0	0	0	-0.005	-0.0236	0.997562	0.681275	0.312209
580	lcl|c222546_g5_i2|m.8425	334	0	0	1	0	0	0	1	0	2	0	0	0	0	0	0	0	0	0	0.006	0.0144	1	0.668948	0.340476
581	lcl|c222555_g2_i4|m.8428	624	21	37	31	51	51	50	39	50	35	36	34	42	38	25	36	44	35	26	0.297	3.8399	0	0	0.524042
582	lcl|c222581_g2_i12|m.8451	210	1	0	4	0	1	0	3	1	0	1	0	0	0	1	0	1	0	1	-0.248	-0.6584	0.179216	0.699592	0.013613
583	lcl|c222581_g2_i12|m.8452	117	0	1	3	1	2	0	2	0	0	0	2	0	1	0	2	0	1	0	-0.337	-0.8734	0.035839	0.672202	0.002244
584	lcl|c222639_g5_i2|m.8480	210	25	27	30	31	45	25	61	48	42	19	40	23	40	27	37	36	33	22	-0.144	-1.8415	0	0.589214	0
585	lcl|c222653_g7_i1|m.8496	290	2	0	2	2	1	0	2	3	4	1	3	4	4	2	1	3	3	2	0.015	0.0476	1	0.656756	0.364432
586	lcl|c222667_g10_i2|m.8509	141	1	1	1	0	2	2	0	0	2	1	1	1	1	0	0	1	2	1	-0.042	-0.1098	0.972816	0.703085	0.246953
587	lcl|c222682_g3_i7|m.8525	229	6	5	7	6	8	7	8	12	10	10	8	6	9	5	9	8	6	8	0.107	0.6479	0.909175	0.193054	0.593499
588	lcl|c222691_g4_i1|m.8535	570	2	0	6	7	9	0	4	2	5	0	8	1	6	1	6	4	10	0	-0.867	-3.2179	0	0.542386	0
589	lcl|c222693_g1_i1|m.8538	183	1	0	0	0	0	0	0	0	1	0	1	0	1	0	0	0	0	0	0.093	0.2164	1	0.570832	0.469251
590	lcl|c222727_g3_i2|m.8582	211	11	9	11	14	12	13	13	14	12	10	11	13	10	10	7	9	9	9	0.221	1.5954	0.001594	6.2e-05	0.5723
591	lcl|c222750_g1_i9|m.8600	174	1	0	1	0	2	0	1	1	1	0	3	0	0	0	1	0	1	2	-0.017	-0.0424	0.994456	0.686746	0.298012
592	lcl|c222798_g5_i3|m.8621	174	0	0	1	0	0	0	1	0	0	0	0	0	0	0	2	0	1	0	-0.005	-0.0113	0.999124	0.677472	0.321435
593	lcl|c222823_g2_i1|m.8631	512	0	1	1	1	0	2	0	0	1	0	0	0	0	0	0	1	1	1	0.205	0.5049	1	0.325677	0.571801
594	lcl|c222837_g1_i1|m.8646	301	16	17	18	10	32	10	27	13	22	8	15	7	26	11	22	13	37	14	-0.56	-4.8399	0	0.521832	0
595	lcl|c222852_g4_i5|m.8661	462	3	1	3	2	2	1	2	0	2	0	3	1	3	1	3	2	4	2	-0.551	-1.6436	4e-06	0.601675	0
596	lcl|c222899_g2_i4|m.8691	257	3	1	3	0	1	2	3	2	1	0	5	1	0	2	5	0	2	3	-0.367	-1.0721	0.005684	0.64881	0.000305
597	lcl|c222909_g1_i1|m.8698	165	1	1	2	1	3	2	3	3	2	1	2	1	2	0	2	1	3	1	-0.34	-0.9371	0.020514	0.664325	0.001225
598	lcl|c222929_g2_i3|m.8717	108	11	4	22	7	13	8	5	3	17	7	16	4	19	11	29	10	28	10	-0.729	-4.9762	0	0.520561	0
599	lcl|c222937_g2_i3|m.8724	199	7	11	9	10	8	10	10	8	8	11	9	11	9	11	7	10	8	15	0.434	2.8328	0	0	0.537639
600	lcl|c222943_g1_i1|m.8725	345	0	2	2	1	1	2	2	2	2	4	8	19	1	1	1	4	0	0	0.738	2.8025	0	0	0.538253
601	lcl|c222946_g2_i3|m.8728	182	10	16	22	16	11	13	21	28	11	7	18	13	12	12	14	10	17	19	0.149	1.25	0.049584	0.002827	0.586463
602	lcl|c222946_g2_i8|m.8729	183	6	8	12	11	6	8	14	13	9	3	10	5	9	5	8	4	8	6	-0.108	-0.6392	0.201991	0.701936	0.015706
603	lcl|c222950_g5_i5|m.8734	584	9	11	28	26	14	18	20	18	14	12	17	24	23	19	15	25	20	24	0.266	2.4302	0	0	0.546197
604	lcl|c222950_g5_i5|m.8735	279	4	7	11	15	7	7	10	10	7	5	8	4	9	12	7	12	8	12	0.345	2.2961	0	0	0.549421
605	lcl|c222950_g5_i7|m.8739	156	2	2	4	3	2	3	3	2	1	1	2	3	3	4	1	2	3	3	0.231	0.7918	0.685467	0.094151	0.601275
606	lcl|c222957_g1_i2|m.8747	211	1	4	1	4	1	1	2	3	1	2	3	6	2	5	1	5	2	5	0.977	3.3572	0	0	0.528892
607	lcl|c222960_g2_i1|m.8750	473	25	26	32	27	25	27	38	35	28	22	32	32	24	22	34	28	25	30	0.101	1.1729	0.091372	0.005776	0.590146
608	lcl|c223053_g2_i3|m.8836	361	1	0	0	0	0	0	2	0	0	0	2	0	0	2	3	0	1	1	-0.123	-0.3067	0.772567	0.724512	0.116132
609	lcl|c223077_g2_i1|m.8858	178	28	14	39	15	39	10	34	13	32	13	35	17	33	16	51	16	36	18	-0.735	-7.1728	0	0.513096	0
610	lcl|c223078_g3_i2|m.8859	240	0	0	0	0	0	0	0	1	0	2	0	0	0	1	0	0	0	0	0.228	0.502	1	0.328519	0.571187
611	lcl|c223098_g6_i2|m.8877	362	0	0	0	0	0	0	0	0	1	0	2	0	2	1	0	0	1	0	-0.106	-0.2488	0.854968	0.721904	0.14984
612	lcl|c223139_g3_i2|m.8898	117	0	0	1	0	2	2	3	1	1	0	2	2	1	0	1	2	3	2	-0.006	-0.0157	0.998628	0.678853	0.318141
613	lcl|c223162_g2_i6|m.8914	891	0	0	1	0	1	0	1	0	1	0	1	0	0	0	1	0	2	0	-0.04	-0.0963	0.978652	0.700212	0.257125
614	lcl|c223200_g1_i1|m.8933	124	0	0	1	0	0	1	0	0	0	0	0	0	0	0	1	0	1	0	0.073	0.1626	1	0.602933	0.439391
615	lcl|c223205_g4_i1|m.8934	312	0	0	2	0	1	0	1	0	1	0	2	1	2	0	4	2	2	0	-0.32	-0.8233	0.054286	0.678565	0.00353
616	lcl|c223214_g1_i1|m.8951	273	0	0	1	0	0	1	0	0	0	0	0	0	0	1	1	0	0	0	0.098	0.2244	1	0.565652	0.473387
617	lcl|c223239_g4_i2|m.8965	112	0	0	0	0	0	0	2	1	0	1	0	1	2	1	0	0	1	0	0.012	0.0273	1	0.664373	0.34988
618	lcl|c223247_g3_i6|m.8971	100	8	9	12	11	8	7	10	14	10	8	5	7	9	4	5	4	6	3	0.07	0.4556	1	0.373756	0.560385
619	lcl|c223259_g2_i5|m.8979	313	0	1	0	0	0	0	0	0	0	0	0	0	0	1	1	0	0	0	0.084	0.1914	0.999988	0.586333	0.455817
620	lcl|c223274_g3_i3|m.8991	104	2	2	2	3	1	2	2	3	1	2	2	3	1	3	3	3	1	3	0.564	1.8183	8.1e-05	3e-06	0.564507
621	lcl|c223275_g1_i2|m.8992	338	10	10	20	5	24	9	25	6	24	8	15	8	15	13	23	6	21	9	-0.695	-4.8526	0	0.5217	0
622	lcl|c223317_g1_i9|m.9035	1112	2	0	0	0	0	0	0	0	0	0	0	0	0	1	0	0	0	0	-0.051	-0.1222	0.966691	0.705553	0.237671
623	lcl|c223331_g1_i2|m.9037	144	0	0	0	2	2	1	1	1	2	1	0	1	0	0	2	0	1	0	-0.049	-0.1189	0.968387	0.704913	0.240135
624	lcl|c223345_g3_i1|m.9044	287	1	2	3	3	3	3	4	5	2	0	3	5	1	2	2	3	2	3	0.38	1.2804	0.038405	0.002104	0.585042
625	lcl|c223351_g1_i1|m.9046	515	3	2	3	2	1	4	5	6	4	2	3	3	1	2	1	2	2	1	0.15	0.5181	0.997554	0.312751	0.574505
626	lcl|c223355_g1_i3|m.9051	622	0	1	0	0	0	0	1	1	0	1	0	0	0	0	1	1	2	2	0.113	0.285	1	0.522977	0.502151
627	lcl|c223357_g4_i3|m.9060	380	0	1	1	0	1	0	1	0	1	0	0	0	0	1	1	1	0	0	0.088	0.1908	0.999985	0.586693	0.455485
628	lcl|c223365_g2_i2|m.9063	401	0	0	1	0	1	0	0	0	0	0	0	0	0	1	2	0	0	0	0.044	0.1039	1	0.632787	0.402878
629	lcl|c223378_g2_i2|m.9075	284	0	0	0	1	0	1	0	1	0	2	0	0	0	2	0	3	1	5	0.682	1.8158	8.4e-05	3e-06	0.564595
630	lcl|c223414_g3_i3|m.9104	326	0	0	0	0	0	0	0	0	0	0	0	0	1	0	0	0	0	1	0.073	0.1857	0.999831	0.589724	0.452645
631	lcl|c223425_g3_i3|m.9106	230	1	1	1	0	3	0	3	1	1	0	3	2	1	0	5	2	4	2	-0.46	-1.3813	0.000172	0.620414	7e-06
632	lcl|c223432_g3_i1|m.9111	190	0	0	1	0	1	0	0	0	0	0	1	1	1	0	0	1	1	0	0.082	0.1857	0.999831	0.589724	0.452645
633	lcl|c223433_g6_i1|m.9115	297	0	1	2	1	2	0	2	0	0	0	1	0	1	2	1	1	2	0	-0.107	-0.2587	0.842247	0.72255	0.143735
634	lcl|c223433_g6_i1|m.9116	125	0	1	2	0	1	0	0	2	0	0	0	0	0	0	0	0	1	2	0.194	0.4731	1	0.35678	0.564681
635	lcl|c223448_g1_i3|m.9130	274	0	1	0	1	0	3	1	3	0	0	0	0	0	1	0	0	0	5	0.722	1.9784	7e-06	0	0.55894
636	lcl|c223454_g1_i3|m.9139	265	2	2	6	3	2	2	6	0	5	1	7	1	2	3	6	2	4	1	-0.736	-2.5918	0	0.556016	0
637	lcl|c223456_g2_i1|m.9146	171	0	0	0	0	0	0	0	0	0	0	0	1	0	0	0	0	1	0	0.133	0.3152	1	0.499468	0.514819
638	lcl|c223499_g2_i4|m.9171	139	0	0	0	0	0	1	0	0	0	0	0	2	0	0	0	0	0	0	0.214	0.4783	1	0.35171	0.565905
639	lcl|c223499_g2_i8|m.9175	176	1	1	1	0	0	0	1	2	2	1	1	3	2	2	2	2	1	1	0.277	0.7693	0.727879	0.106681	0.600785
640	lcl|c223510_g3_i1|m.9178	1249	0	0	0	1	0	1	0	0	0	0	0	0	0	0	0	1	0	0	0.038	0.0843	1	0.641626	0.389843
641	lcl|c223556_g1_i6|m.9203	288	18	12	14	13	15	13	21	14	14	12	14	11	14	7	25	12	14	9	-0.209	-1.6527	4e-06	0.601072	0
642	lcl|c223583_g5_i3|m.9218	185	0	0	0	0	0	0	0	0	0	1	0	0	0	0	2	0	0	0	-0.009	-0.0201	0.998007	0.680211	0.31484
643	lcl|c223597_g3_i2|m.9232	218	1	0	1	0	1	0	2	0	0	0	5	0	0	0	0	0	0	0	-0.23	-0.5841	0.277686	0.708359	0.023289
644	lcl|c223604_g1_i1|m.9235	380	0	0	0	0	1	0	1	0	0	0	0	0	0	0	3	0	6	0	-0.397	-1.0356	0.008148	0.652823	0.00045
645	lcl|c223608_g1_i1|m.9238	854	0	1	2	0	2	1	1	1	1	0	0	0	0	0	0	0	2	0	-0.187	-0.4424	0.527661	0.721216	0.057285
646	lcl|c223611_g2_i2|m.9249	465	1	0	2	0	2	1	0	1	1	1	0	0	0	0	0	1	0	0	-0.079	-0.1909	0.917774	0.716357	0.188042
647	lcl|c223616_g1_i1|m.9252	300	1	0	2	0	1	0	1	0	1	0	2	0	0	0	1	0	3	1	-0.253	-0.6233	0.22228	0.70384	0.017641
648	lcl|c223617_g5_i1|m.9254	131	0	1	2	2	2	4	1	3	1	2	0	5	1	1	1	1	0	0	0.726	1.9089	2.1e-05	1e-06	0.561336
649	lcl|c223629_g2_i1|m.9258	236	5	4	4	3	6	6	13	17	11	4	7	8	8	4	6	6	8	3	-0.057	-0.3221	0.747722	0.724754	0.108012
650	lcl|c223629_g2_i2|m.9260	236	4	3	4	3	5	4	11	11	8	3	4	5	6	3	4	3	6	2	-0.17	-0.793	0.069024	0.682456	0.004598
651	lcl|c223646_g1_i6|m.9275	756	0	0	1	0	0	0	1	0	0	0	0	1	0	1	0	0	0	1	0.038	0.081	1	0.64306	0.38761
652	lcl|c223654_g2_i2|m.9279	266	0	0	0	0	1	1	1	0	1	0	0	0	0	0	1	0	1	1	0.084	0.1899	0.999974	0.587231	0.454986
653	lcl|c223673_g1_i2|m.9291	296	0	3	3	6	2	4	1	4	1	2	0	2	1	3	1	2	0	3	0.907	2.9862	0	0	0.534638
654	lcl|c223673_g1_i3|m.9293	297	0	3	4	19	5	12	1	4	1	4	0	2	1	3	1	1	0	1	1.225	4.5674	0	0	0.519473
655	lcl|c223673_g1_i4|m.9295	168	0	3	2	4	2	4	1	7	1	6	0	3	1	2	1	2	0	2	1.124	3.5824	0	0	0.526461
656	lcl|c223673_g2_i1|m.9297	282	0	3	3	3	3	4	2	4	2	4	0	5	2	5	3	2	2	1	0.604	2.2161	0	0	0.551544
657	lcl|c223677_g1_i1|m.9303	216	3	6	10	11	7	7	11	11	8	8	4	7	8	2	9	11	9	7	0.171	0.9969	0.29224	0.024475	0.598039
658	lcl|c223689_g4_i1|m.9313	123	2	4	5	6	4	3	7	3	7	3	1	3	3	2	3	1	2	1	-0.083	-0.3192	0.752493	0.724723	0.109513
659	lcl|c223710_g5_i3|m.9324	298	0	0	1	0	0	0	0	0	0	0	0	0	0	2	0	0	0	0	0.162	0.3961	1	0.429824	0.543604
660	lcl|c223711_g2_i5|m.9326	366	0	1	1	1	1	1	1	1	1	1	0	0	0	1	0	1	0	0	0.122	0.2908	1	0.518577	0.504668
661	lcl|c223761_g4_i7|m.9360	798	0	0	1	1	1	0	1	0	1	0	0	0	0	0	0	0	1	0	0.061	0.1453	1	0.612276	0.429042
662	lcl|c223775_g7_i2|m.9373	242	0	2	0	1	3	2	1	1	0	2	1	7	2	4	3	6	5	5	0.608	2.1138	1e-06	0	0.554533
663	lcl|c223794_g7_i1|m.9389	789	6	0	7	1	2	0	0	0	12	0	2	0	5	1	6	0	9	0	-1.441	-4.2558	0	0.528656	0
664	lcl|c223798_g3_i1|m.9397	382	0	0	0	0	0	0	1	0	0	0	0	0	0	1	0	1	1	1	0.1	0.2205	1	0.568191	0.471381
665	lcl|c223808_g2_i1|m.9405	428	0	0	0	1	1	0	1	1	0	0	0	2	0	1	1	1	0	0	0.149	0.35	1	0.470627	0.528095
666	lcl|c223847_g2_i6|m.9428	447	0	0	1	0	1	0	0	0	0	0	0	0	0	0	0	0	1	0	0.083	0.193	0.999981	0.585372	0.4567
667	lcl|c223865_g4_i2|m.9445	349	7	5	12	6	9	5	7	9	9	4	9	3	8	6	8	4	6	4	-0.324	-1.6958	2e-06	0.598257	0
668	lcl|c223870_g1_i6|m.9447	557	16	12	27	23	23	6	26	18	26	6	13	18	17	12	15	10	20	15	-0.249	-2.0873	0	0.575715	0
669	lcl|c223901_g5_i2|m.9467	376	0	0	0	0	0	0	1	0	0	0	1	0	1	0	1	0	0	0	0.069	0.1536	1	0.607851	0.434051
670	lcl|c223941_g1_i2|m.9485	692	0	2	3	2	3	1	7	4	2	4	4	3	5	3	1	2	4	4	-0.024	-0.0962	0.978692	0.70019	0.257201
671	lcl|c223971_g2_i1|m.9513	322	0	0	0	1	0	0	0	0	0	0	1	1	0	0	1	0	0	0	0.085	0.2005	0.999915	0.580809	0.460795
672	lcl|c223975_g3_i3|m.9516	259	1	4	5	5	4	4	6	4	3	3	4	15	6	11	6	12	6	11	0.66	3.424	0	0	0.528119
673	lcl|c223983_g2_i8|m.9524	310	1	2	1	0	1	1	2	0	0	2	0	1	0	1	0	0	0	1	0.206	0.4844	1	0.345752	0.56731
674	lcl|c223990_g2_i1|m.9532	308	1	1	3	0	2	0	3	0	1	0	2	1	0	0	3	0	0	1	-0.426	-1.1221	0.003415	0.643549	0.000175
675	lcl|c224015_g2_i1|m.9549	138	0	0	2	0	2	0	1	1	1	0	1	1	1	2	1	0	2	0	-0.037	-0.0894	0.981328	0.698668	0.262344
676	lcl|c224026_g2_i1|m.9560	249	0	2	0	2	1	0	2	2	1	1	1	1	1	0	0	1	2	1	0.163	0.4187	1	0.408901	0.550389
677	lcl|c224026_g2_i4|m.9562	249	2	0	3	0	1	0	2	0	8	0	4	0	4	0	7	0	4	0	-1.115	-3.1483	0	0.543716	0
678	lcl|c224029_g4_i1|m.9563	590	29	30	38	30	45	30	47	42	40	26	41	29	45	29	48	39	44	40	-0.075	-0.9933	0.012219	0.657648	0.000699
679	lcl|c224042_g7_i2|m.9570	274	2	0	1	0	1	0	2	0	1	0	0	0	1	0	2	0	2	0	-0.23	-0.5859	0.274977	0.708157	0.023001
680	lcl|c224057_g7_i5|m.9575	394	0	0	0	0	1	2	1	0	0	1	0	0	0	0	0	1	0	0	0.165	0.3777	1	0.446435	0.537688
681	lcl|c224072_g3_i2|m.9582	215	0	1	0	1	0	0	0	0	0	1	0	0	0	0	0	0	0	0	0.091	0.202	0.999995	0.579886	0.461606
682	lcl|c224106_g1_i3|m.9604	305	0	0	0	0	0	1	1	5	0	1	0	1	0	0	0	2	0	1	0.475	1.2544	0.047808	0.00271	0.586255
683	lcl|c224130_g1_i5|m.9625	239	0	0	1	0	1	0	1	0	0	0	1	0	0	0	1	1	1	1	0.077	0.1717	0.999919	0.597831	0.444689
684	lcl|c224156_g3_i2|m.9641	1123	4	23	11	28	11	25	14	17	10	21	16	50	19	38	8	19	19	32	0.973	8.5427	0	0	0.51248
685	lcl|c224182_g8_i1|m.9652	631	1	0	0	1	2	0	3	0	2	1	1	1	1	0	4	1	2	2	-0.377	-1.0238	0.009135	0.65415	0.00051
686	lcl|c224201_g3_i8|m.9658	130	26	19	34	16	47	12	41	20	34	11	29	14	32	18	32	19	40	17	-0.595	-5.8973	0	0.51634	0
687	lcl|c224226_g3_i3|m.9665	182	1	1	1	1	1	1	1	0	2	2	1	1	1	1	1	1	1	1	0.079	0.1804	0.999917	0.592829	0.449662
688	lcl|c224242_g3_i7|m.9677	306	1	1	3	2	2	0	2	2	2	0	3	0	2	2	3	2	3	2	-0.256	-0.7173	0.120914	0.692188	0.008618
689	lcl|c224257_g2_i4|m.9682	236	5	0	4	1	5	3	5	4	7	1	2	0	5	1	3	3	6	2	-0.709	-2.4819	0	0.559324	0
690	lcl|c224260_g2_i3|m.9686	198	0	0	2	0	2	0	2	1	2	1	1	0	0	1	2	0	0	0	-0.283	-0.6651	0.17173	0.698764	0.012941
691	lcl|c224263_g3_i3|m.9691	911	4	3	7	2	11	1	7	4	3	1	5	5	6	3	4	4	4	3	-0.523	-2.1442	0	0.572921	0
692	lcl|c224289_g1_i1|m.9705	327	1	1	1	3	2	0	3	0	2	1	1	1	0	1	2	0	1	0	-0.101	-0.2618	0.838102	0.722734	0.141851
693	lcl|c224289_g3_i1|m.9708	110	0	0	0	1	0	0	0	0	0	0	0	2	0	0	0	0	0	0	0.183	0.4123	1	0.41488	0.54852
694	lcl|c224310_g1_i1|m.9717	510	0	0	0	0	0	0	1	1	0	0	0	0	0	0	0	1	0	0	0.114	0.2495	1	0.548716	0.48585
695	lcl|c224312_g2_i3|m.9718	851	0	2	17	17	14	7	12	12	0	4	10	5	3	3	11	6	17	8	-0.121	-0.7428	0.10077	0.688921	0.00701
696	lcl|c224332_g10_i1|m.9746	242	1	0	1	0	0	0	2	1	0	0	0	0	1	0	1	0	1	0	0.033	0.0771	1	0.644737	0.384958
697	lcl|c224365_g3_i1|m.9762	317	0	2	1	3	2	0	1	2	0	1	0	0	0	1	1	1	1	0	0.35	0.8585	0.552831	0.063281	0.601523
698	lcl|c224371_g5_i1|m.9765	103	0	1	0	2	1	1	0	1	1	2	0	2	1	2	0	1	0	0	0.489	1.2094	0.068878	0.004145	0.588393
699	lcl|c224405_g1_i1|m.9772	539	7	3	13	2	9	0	12	7	11	2	15	3	11	5	22	5	16	3	-1.119	-5.8601	0	0.516521	0
700	lcl|c224432_g1_i4|m.9787	279	27	17	38	20	34	13	30	18	26	10	21	11	30	13	30	11	22	18	-0.513	-4.5215	0	0.525632	0
701	lcl|c224457_g1_i1|m.9820	448	5	2	4	2	7	0	9	3	9	2	13	1	8	3	2	0	4	1	-1.131	-3.9849	0	0.531713	0
702	lcl|c224488_g1_i1|m.9847	546	3	5	6	4	4	7	4	6	3	1	5	1	3	1	7	2	2	0	-0.124	-0.5006	0.418181	0.716773	0.040376
703	lcl|c224493_g2_i5|m.9854	134	1	0	0	0	0	0	4	0	1	0	2	0	1	0	1	0	2	0	-0.264	-0.6432	0.197085	0.701451	0.015248
704	lcl|c224498_g4_i2|m.9859	324	0	1	3	2	1	1	1	1	0	0	1	2	2	0	2	0	3	1	-0.167	-0.4068	0.595627	0.723159	0.069983
705	lcl|c224520_g2_i6|m.9890	1035	0	0	1	1	1	1	2	0	1	1	0	0	0	0	0	0	0	0	-0.034	-0.0751	0.986213	0.695301	0.273189
706	lcl|c224522_g3_i3|m.9891	404	0	1	1	1	1	0	0	0	1	0	0	0	0	1	0	0	0	0	0.076	0.1707	0.999877	0.598397	0.444112
707	lcl|c224534_g1_i4|m.9895	223	1	0	0	1	1	0	1	0	0	0	1	0	0	0	1	0	1	1	0.097	0.2293	1	0.562428	0.475881
708	lcl|c224539_g4_i1|m.9897	200	0	0	2	1	0	0	1	1	0	1	0	0	0	0	1	0	1	0	0.035	0.0822	1	0.64254	0.388423
709	lcl|c224541_g6_i2|m.9899	194	0	0	1	1	0	0	0	0	0	0	0	1	0	0	0	0	0	0	0.093	0.2037	1	0.578835	0.462522
710	lcl|c224556_g6_i1|m.9931	209	3	5	7	5	9	3	8	8	6	5	13	10	4	6	7	6	0	0	-0.02	-0.1012	0.976633	0.701278	0.253426
711	lcl|c224557_g2_i1|m.9933	147	11	4	9	4	8	3	8	4	7	4	5	2	9	2	11	1	5	2	-0.852	-3.7867	0	0.534112	0
712	lcl|c224583_g1_i1|m.9971	474	0	1	1	0	0	0	1	0	0	0	0	0	0	0	0	0	0	0	0.073	0.1576	1	0.605681	0.436436
713	lcl|c224589_g7_i1|m.9992	130	1	1	0	0	2	2	3	3	1	1	1	3	3	3	3	4	3	3	0.3	0.9582	0.358532	0.032461	0.5994
714	lcl|c224597_g3_i1|m.10003	179	1	2	4	1	4	1	4	2	2	2	5	2	3	1	4	2	4	3	-0.506	-1.721	1e-06	0.59664	0
715	lcl|c224624_g2_i1|m.10023	207	6	4	6	2	5	5	7	5	5	8	7	5	4	6	7	6	7	6	0.037	0.1872	0.9999	0.588837	0.453484
716	lcl|c224624_g4_i1|m.10025	200	9	6	6	4	5	5	11	10	5	12	5	8	8	7	7	12	7	7	0.277	1.5829	0.00185	7.3e-05	0.572746
717	lcl|c224667_g2_i1|m.10051	215	1	0	2	0	1	0	1	0	0	0	1	0	0	0	1	0	2	0	-0.106	-0.2517	0.85132	0.722102	0.148038
718	lcl|c224670_g2_i1|m.10052	715	0	3	0	1	0	0	0	3	0	3	0	5	0	4	0	0	0	0	0.879	2.4989	0	0	0.544657
719	lcl|c224672_g1_i1|m.10055	661	11	9	22	16	14	19	11	19	13	7	10	17	15	8	17	8	11	11	0.072	0.5493	0.985659	0.282454	0.580304
720	lcl|c224672_g2_i1|m.10058	617	34	54	75	70	57	93	62	72	51	48	62	109	66	37	50	66	64	73	0.351	5.8589	0	0	0.515055
721	lcl|c224694_g1_i1|m.10068	192	3	7	7	10	3	3	6	8	4	5	3	8	7	7	2	8	6	11	0.643	3.2005	0	0	0.530997
722	lcl|c224713_g2_i1|m.10075	309	1	1	1	1	0	0	4	4	4	1	2	2	2	1	6	3	4	1	-0.329	-1.0267	0.008883	0.653823	0.000495
723	lcl|c224781_g7_i2|m.10124	141	0	0	1	0	0	0	1	1	1	0	1	0	1	0	1	0	0	1	0.071	0.1672	0.999948	0.600369	0.442082
724	lcl|c224805_g7_i4|m.10145	216	0	0	0	1	0	1	0	0	0	0	0	0	0	0	0	0	0	0	0.1	0.2335	1	0.559633	0.477996
725	lcl|c224811_g1_i3|m.10150	228	2	0	2	1	1	0	3	1	1	1	2	1	0	0	2	0	1	0	-0.341	-0.8538	0.04227	0.674677	0.002686
726	lcl|c224826_g3_i1|m.10162	244	1	2	0	1	1	1	1	1	2	1	2	2	1	1	0	1	0	4	0.286	0.7245	0.805099	0.134923	0.599077
727	lcl|c224835_g5_i2|m.10167	156	3	4	5	4	7	4	11	10	6	6	10	14	8	9	10	11	11	7	0.131	0.7852	0.698205	0.097713	0.601155
728	lcl|c224848_g2_i1|m.10169	247	1	1	3	0	3	0	2	1	2	0	2	0	1	0	3	0	4	0	-0.651	-1.7094	1e-06	0.597382	0
729	lcl|c224848_g3_i5|m.10172	253	7	3	7	6	7	3	5	4	12	4	3	2	11	3	8	5	9	2	-0.589	-2.7152	0	0.552832	0
730	lcl|c224866_g1_i2|m.10191	310	1	7	9	8	14	7	0	0	5	4	2	3	6	7	6	11	9	4	0.158	0.8192	0.631883	0.080362	0.601579
731	lcl|c224867_g5_i1|m.10192	1064	0	1	0	2	0	1	0	0	0	0	0	0	0	0	0	0	0	1	0.181	0.417	1	0.410493	0.549896
732	lcl|c224880_g4_i1|m.10208	327	1	3	1	0	1	2	2	2	1	2	1	0	1	0	0	0	0	1	0.406	1.0726	0.185271	0.013579	0.594864
733	lcl|c224918_g1_i1|m.10239	245	14	12	10	17	10	11	7	18	11	10	16	21	14	17	11	11	11	6	0.303	2.1502	0	0	0.553433
734	lcl|c224995_g6_i2|m.10289	378	2	0	0	1	0	0	1	2	1	0	1	2	0	0	1	1	2	0	0.089	0.2294	1	0.562362	0.475932
735	lcl|c225009_g5_i8|m.10303	226	0	0	0	0	0	1	0	0	1	0	0	0	1	0	0	0	0	0	0.119	0.2772	1	0.528811	0.498701
736	lcl|c225015_g2_i1|m.10306	238	4	0	3	2	4	1	3	0	2	0	3	0	3	0	4	0	2	0	-0.823	-2.4505	0	0.560365	0
737	lcl|c225079_g1_i6|m.10351	576	3	5	2	4	3	2	4	7	4	6	2	6	4	6	3	4	3	4	0.592	2.5554	0	0	0.543426
738	lcl|c225110_g1_i1|m.10369	318	0	0	0	10	0	10	0	0	0	9	0	0	0	0	0	16	0	17	1.959	6.0653	0	0	0.51464
739	lcl|c225112_g3_i3|m.10371	453	0	1	0	1	0	0	1	1	0	1	0	0	0	1	0	0	1	0	0.097	0.2272	1	0.563814	0.474816
740	lcl|c225115_g3_i4|m.10375	479	0	0	1	1	1	0	0	0	1	0	0	0	1	0	0	0	0	0	0.074	0.1672	0.999948	0.600369	0.442082
741	lcl|c225132_g1_i3|m.10387	308	0	0	0	1	0	0	1	0	0	0	0	0	0	0	0	0	1	1	0.073	0.1676	0.999924	0.600145	0.442314
742	lcl|c225136_g5_i9|m.10397	406	0	0	2	0	0	0	0	0	0	0	1	0	0	1	0	1	1	1	-0.009	-0.0228	0.997658	0.681033	0.312811
743	lcl|c225144_g2_i3|m.10400	439	3	3	8	3	8	3	6	1	5	2	3	0	5	2	4	2	3	3	-0.634	-2.4	0	0.562132	0
744	lcl|c225156_g8_i5|m.10409	484	0	0	0	0	0	0	0	1	0	0	0	0	1	1	0	0	1	0	0.062	0.1442	1	0.612855	0.428372
745	lcl|c225168_g2_i4|m.10419	182	0	0	0	0	0	0	0	0	0	0	0	2	0	0	0	0	0	0	0.192	0.4628	1	0.36679	0.562186
746	lcl|c225172_g3_i1|m.10424	337	3	2	10	7	2	1	1	1	5	2	6	1	9	3	2	1	3	2	-0.537	-2.0927	0	0.575444	0
747	lcl|c225214_g2_i5|m.10448	441	0	0	1	1	1	0	1	1	1	0	1	0	1	0	2	1	1	1	0.008	0.0192	1	0.667269	0.343988
748	lcl|c225222_g1_i4|m.10453	263	0	0	0	0	1	0	2	0	0	0	1	0	0	0	1	1	2	0	-0.106	-0.2621	0.8377	0.722751	0.14167
749	lcl|c225236_g1_i2|m.10460	268	1	0	0	1	0	0	2	1	0	0	6	1	1	2	5	1	2	3	-0.354	-1.0249	0.009039	0.654026	0.000504
750	lcl|c225245_g1_i2|m.10472	322	0	0	0	0	0	0	0	0	0	2	0	5	0	2	0	2	0	3	0.726	1.886	3e-05	1e-06	0.562136
751	lcl|c225266_g1_i7|m.10481	657	0	0	0	0	1	0	2	2	0	0	0	0	0	0	0	0	1	0	0.071	0.1598	1	0.604477	0.43774
752	lcl|c225267_g2_i1|m.10483	272	0	0	0	0	0	0	0	1	0	0	0	1	0	0	0	1	0	0	0.083	0.1838	0.999738	0.590842	0.451579
753	lcl|c225281_g3_i2|m.10487	267	1	2	1	2	2	3	4	2	2	2	2	3	3	4	3	2	3	2	0.186	0.6305	0.927284	0.207825	0.591698
754	lcl|c225308_g1_i1|m.10501	117	8	13	8	15	4	10	5	15	4	14	5	19	8	10	4	23	7	19	1.096	6.9346	0	0	0.513441
755	lcl|c225308_g1_i4|m.10503	111	3	7	5	11	1	9	2	12	2	11	1	14	5	10	1	17	3	14	1.648	8.2759	0	0	0.512783
756	lcl|c225316_g3_i2|m.10516	126	3	1	3	0	4	0	3	1	3	0	1	0	0	0	0	0	1	0	-0.546	-1.3961	0.000142	0.619266	6e-06
757	lcl|c225323_g2_i2|m.10522	252	7	9	18	8	19	8	23	8	20	10	21	14	18	9	13	20	14	15	-0.233	-1.8602	0	0.588108	0
758	lcl|c225328_g5_i5|m.10528	302	0	0	2	1	2	1	1	1	0	1	4	0	0	0	2	0	2	1	-0.406	-1.0348	0.008212	0.652912	0.000454
759	lcl|c225334_g2_i2|m.10532	199	0	0	0	0	0	1	0	1	0	1	0	0	0	0	0	0	0	0	0.13	0.3059	1	0.506863	0.511034
760	lcl|c225352_g1_i1|m.10544	333	35	52	36	30	46	33	48	51	41	32	33	39	51	50	36	52	42	44	0.202	2.8192	0	0	0.537914
761	lcl|c225359_g3_i1|m.10554	224	0	0	1	0	0	0	0	0	0	0	0	0	0	1	1	0	0	0	0.093	0.2182	1	0.569676	0.470189
762	lcl|c225365_g4_i1|m.10559	301	0	0	0	0	0	0	0	0	0	0	0	1	0	0	0	1	1	1	0.062	0.1513	1	0.609088	0.432671
763	lcl|c225394_g4_i2|m.10584	194	6	6	8	10	9	5	8	6	11	3	11	4	13	6	13	5	15	7	-0.418	-2.3388	0	0.564435	0
764	lcl|c225423_g3_i2|m.10600	769	0	2	3	3	2	3	3	1	4	1	1	1	2	2	2	2	2	2	-0.009	-0.0272	0.997078	0.682354	0.309498
765	lcl|c225457_g2_i2|m.10643	1084	0	0	0	0	0	0	0	0	0	1	0	0	1	0	0	0	0	0	0.048	0.1124	1	0.628783	0.408405
766	lcl|c225471_g2_i2|m.10654	631	15	12	21	15	19	10	27	10	18	7	26	12	19	11	30	12	27	12	-0.533	-4.493	0	0.525975	0
767	lcl|c225497_g2_i1|m.10682	209	1	1	0	1	0	1	0	1	1	1	1	1	1	1	1	1	1	1	0.056	0.1323	1	0.618994	0.421035
768	lcl|c225590_g2_i4|m.10752	336	3	3	5	3	5	3	5	3	4	5	4	4	6	3	4	3	5	6	-0.036	-0.156	0.945938	0.711465	0.212801
769	lcl|c225618_g2_i6|m.10783	517	9	6	18	7	14	6	16	7	15	4	12	3	9	4	15	2	12	6	-0.807	-4.6847	0	0.523622	0
770	lcl|c225632_g3_i1|m.10790	867	4	5	10	5	12	6	11	4	7	5	12	6	8	8	18	8	10	5	-0.396	-2.3803	0	0.562854	0
771	lcl|c225668_g5_i2|m.10809	209	5	9	5	6	5	5	8	9	3	7	3	9	4	9	5	6	5	7	0.59	2.8914	0	0	0.536467
772	lcl|c225713_g4_i1|m.10851	411	0	0	0	0	3	0	1	2	2	1	1	0	1	0	2	0	1	1	-0.122	-0.3139	0.761215	0.724648	0.112291
773	lcl|c225747_g4_i14|m.10902	729	0	1	0	1	0	0	1	1	0	0	0	0	0	0	0	0	0	0	0.08	0.1895	0.999967	0.58747	0.454764
774	lcl|c225753_g2_i5|m.10911	182	0	0	1	0	0	0	0	0	1	0	1	1	1	0	1	2	1	0	0.215	0.4922	1	0.338121	0.569061
775	lcl|c225756_g1_i2|m.10914	306	0	0	3	0	12	0	3	0	2	0	6	0	0	0	2	0	2	0	-1.017	-2.895	0	0.548845	0
776	lcl|c225761_g4_i1|m.10923	163	0	1	0	1	0	0	0	0	0	0	0	1	0	0	0	0	0	0	0.114	0.2706	1	0.533667	0.495724
777	lcl|c225761_g6_i1|m.10925	326	10	14	10	12	9	13	10	12	8	7	5	7	8	5	7	4	11	7	0.19	1.1448	0.112591	0.007402	0.591493
778	lcl|c225775_g7_i7|m.10937	196	5	1	9	2	10	0	5	1	11	1	14	3	12	3	9	0	16	4	-1.436	-5.7222	0	0.517156	0
779	lcl|c225820_g10_i1|m.10972	120	0	0	0	0	1	0	0	0	1	0	0	0	0	0	0	0	0	0	0.125	0.303	1	0.509141	0.509832
780	lcl|c225822_g2_i4|m.10975	295	0	0	1	1	2	1	1	1	1	2	0	2	0	1	0	0	0	1	0.196	0.4755	1	0.354441	0.565249
781	lcl|c225829_g1_i1|m.10978	137	25	30	30	22	32	26	37	37	31	29	43	32	46	35	37	38	42	27	0.013	0.1549	1	0.607148	0.434828
782	lcl|c225844_g2_i3|m.10984	292	4	5	3	6	6	3	6	10	3	4	6	9	3	4	5	7	5	12	0.531	2.6754	0	0	0.54088
783	lcl|c225849_g2_i3|m.10990	429	0	1	3	3	3	1	0	1	2	1	2	1	1	1	2	1	0	0	-0.218	-0.591	0.267411	0.707584	0.022198
784	lcl|c225852_g2_i3|m.10992	292	0	0	0	1	2	0	0	0	0	0	1	0	0	0	0	0	1	0	-0.003	-0.0071	0.99948	0.676132	0.32457
785	lcl|c225858_g7_i1|m.10995	113	0	0	0	0	0	0	0	0	0	0	1	0	0	0	0	1	0	0	0.051	0.1114	1	0.629259	0.407759
786	lcl|c225867_g3_i1|m.11000	208	0	0	1	0	0	0	0	0	0	0	1	0	0	0	0	0	1	0	0.138	0.3151	1	0.499548	0.514779
787	lcl|c225875_g4_i2|m.11006	204	2	2	4	2	3	2	1	3	3	2	2	3	4	1	5	3	1	4	0.017	0.0604	1	0.651683	0.373434
788	lcl|c225931_g4_i1|m.11061	108	1	0	3	0	1	0	2	0	0	0	1	0	1	0	3	0	0	0	-0.296	-0.7445	0.099527	0.688702	0.006913
789	lcl|c225938_g3_i1|m.11067	223	0	0	0	0	0	0	0	0	0	0	0	0	1	0	1	0	1	0	0.094	0.2257	1	0.5648	0.474052
790	lcl|c225972_g1_i1|m.11091	360	67	69	100	100	77	55	115	86	80	54	91	89	84	63	109	110	92	64	-0.008	-0.1654	0.939069	0.712902	0.206027
791	lcl|c226005_g4_i1|m.11126	287	0	0	0	0	0	1	0	1	0	2	6	6	0	2	2	5	0	0	0.382	1.0945	0.160285	0.011348	0.593864
792	lcl|c226009_g3_i5|m.11131	932	1	1	7	0	1	0	0	0	0	1	0	0	1	1	1	0	1	0	-0.362	-0.9276	0.022338	0.665481	0.001344
793	lcl|c226046_g1_i2|m.11150	502	4	8	11	9	7	7	12	11	15	7	10	9	18	10	12	9	14	7	-0.118	-0.8371	0.048525	0.676801	0.003122
794	lcl|c226079_g3_i1|m.11186	256	1	1	5	4	3	1	3	0	4	2	4	2	4	2	4	2	5	2	-0.458	-1.6291	5e-06	0.60264	0
795	lcl|c226079_g3_i2|m.11188	354	1	0	6	4	3	3	5	1	2	2	3	2	5	2	4	1	7	2	-0.493	-1.7105	1e-06	0.597312	0
796	lcl|c226084_g3_i2|m.11194	197	1	2	1	3	1	5	2	0	1	1	1	6	1	4	2	4	2	4	0.973	3.0058	0	0	0.534273
797	lcl|c226094_g1_i1|m.11204	114	0	0	0	0	0	0	4	0	0	0	1	0	0	0	0	0	0	0	-0.155	-0.383	0.64034	0.724069	0.079538
798	lcl|c226099_g2_i1|m.11211	597	0	1	1	1	0	3	1	1	0	0	0	1	1	2	1	3	1	2	0.571	1.5147	0.004019	0.000166	0.57524
799	lcl|c226115_g1_i8|m.11228	483	0	0	0	1	1	1	0	0	0	0	0	0	0	0	0	0	0	0	0.066	0.1495	1	0.61005	0.431587
800	lcl|c226138_g2_i1|m.11236	129	2	2	3	3	2	2	2	3	2	1	2	2	2	3	2	0	2	0	0.076	0.2397	1	0.555452	0.481077
801	lcl|c226146_g2_i7|m.11244	623	0	4	0	5	0	2	4	5	1	5	1	6	3	3	5	4	2	3	0.736	2.9418	0	0	0.535483
802	lcl|c226155_g2_i3|m.11249	584	0	0	3	0	1	0	1	0	0	0	0	0	0	0	2	0	0	0	-0.167	-0.3949	0.61809	0.723655	0.074651
803	lcl|c226156_g7_i2|m.11251	127	0	0	1	2	1	1	2	0	0	0	0	0	0	0	1	1	0	0	0.112	0.2661	1	0.536939	0.493664
804	lcl|c226189_g2_i2|m.11277	115	1	0	0	0	0	0	3	0	2	0	1	0	1	0	0	1	1	2	-0.015	-0.0379	0.995265	0.685473	0.301419
805	lcl|c226194_g1_i2|m.11280	483	0	0	0	0	1	0	1	0	0	0	0	0	0	0	0	0	0	0	0.058	0.133	1	0.618638	0.421471
806	lcl|c226211_g2_i1|m.11296	245	1	1	0	0	0	0	0	0	2	1	1	0	1	1	0	0	1	1	-0.017	-0.0414	0.994646	0.686465	0.29877
807	lcl|c226212_g1_i3|m.11297	389	0	0	0	0	1	1	0	0	0	0	0	0	0	0	0	0	1	3	0.288	0.7114	0.825667	0.144007	0.598376
808	lcl|c226216_g1_i2|m.11298	323	8	9	12	7	14	5	14	5	15	4	16	11	19	4	14	9	13	8	-0.542	-3.4901	0	0.537922	0
809	lcl|c226230_g2_i2|m.11305	377	2	3	2	3	2	3	5	4	5	2	3	2	1	1	3	4	2	1	0.064	0.2244	1	0.565652	0.473387
810	lcl|c226263_g3_i5|m.11341	133	0	0	0	0	0	0	1	0	0	0	2	0	0	0	0	0	0	1	-0.003	-0.0073	0.999466	0.676196	0.324421
811	lcl|c226287_g1_i1|m.11356	285	3	3	6	5	4	2	5	4	3	2	7	6	8	3	3	3	6	3	-0.22	-0.9262	0.02262	0.665652	0.001362
812	lcl|c226287_g1_i2|m.11357	294	3	3	5	5	3	2	4	4	3	2	5	5	7	2	3	3	6	3	-0.15	-0.6439	0.196236	0.701366	0.015169
813	lcl|c226291_g5_i2|m.11359	336	0	0	0	0	1	0	1	0	1	0	1	0	1	0	0	0	1	0	0.114	0.2629	1	0.539245	0.492184
814	lcl|c226303_g1_i2|m.11380	882	0	0	0	1	0	0	0	0	0	1	1	0	1	0	1	0	1	0	0.094	0.2197	1	0.568708	0.470967
815	lcl|c226307_g4_i3|m.11386	388	1	0	0	1	0	0	0	0	0	0	0	0	0	0	0	0	0	0	0.045	0.1029	1	0.633251	0.402223
816	lcl|c226344_g7_i1|m.11422	382	0	1	0	1	1	0	3	0	1	1	0	0	1	0	1	0	1	0	-0.068	-0.1625	0.941221	0.712468	0.208109
817	lcl|c226346_g1_i1|m.11426	227	0	0	1	0	1	1	1	0	1	1	1	1	1	1	3	2	1	1	0.007	0.0175	1	0.667867	0.342746
818	lcl|c226389_g3_i1|m.11454	429	0	0	2	0	2	1	3	0	2	0	2	1	1	1	3	1	4	2	-0.532	-1.4801	4.6e-05	0.612993	2e-06
819	lcl|c226409_g2_i1|m.11459	423	0	1	1	1	0	3	1	1	0	0	4	2	1	1	1	4	3	3	0.317	0.965	0.346359	0.030918	0.599178
820	lcl|c226414_g3_i1|m.11460	158	11	8	10	7	11	4	12	5	15	4	10	10	15	10	12	8	14	12	-0.303	-1.9699	0	0.581881	0
821	lcl|c226450_g3_i4|m.11486	231	11	10	17	14	15	11	19	15	14	9	14	10	13	10	13	16	12	13	0	0.0026	0.999987	0.672958	0.331778
822	lcl|c226454_g2_i17|m.11487	261	0	2	3	2	1	2	1	1	3	2	1	1	1	1	1	1	1	2	0.203	0.5627	0.978808	0.269633	0.582543
823	lcl|c226454_g2_i2|m.11493	433	0	2	1	2	2	2	1	1	3	2	1	1	1	1	1	1	1	2	0.234	0.6315	0.926301	0.206962	0.591807
824	lcl|c226478_g2_i1|m.11529	625	0	0	0	0	0	0	0	0	1	0	1	0	0	0	0	0	0	0	0.077	0.1709	0.999886	0.598284	0.444227
825	lcl|c226496_g1_i2|m.11534	122	1	1	2	2	2	2	1	2	2	1	0	0	2	1	1	1	0	0	0.056	0.1357	1	0.617261	0.423148
826	lcl|c226505_g3_i2|m.11536	906	0	0	1	0	1	0	1	3	0	0	0	0	0	0	0	1	1	1	0.235	0.587	0.963668	0.246815	0.586231
827	lcl|c226513_g6_i2|m.11548	473	0	0	0	0	0	0	0	1	0	0	0	0	0	0	0	0	1	1	0.077	0.1783	0.999978	0.594048	0.44847
828	lcl|c226592_g1_i2|m.11602	1166	0	1	1	0	0	0	0	0	1	0	0	0	0	1	0	2	1	0	0.155	0.3722	1	0.451319	0.53585
829	lcl|c226593_g2_i1|m.11607	266	2	3	3	3	2	4	5	4	4	1	3	1	1	1	1	1	2	1	-0.036	-0.1179	0.968892	0.704716	0.240882
830	lcl|c226607_g5_i2|m.11621	132	0	0	1	0	0	0	0	1	0	0	0	0	0	0	0	0	1	2	0.186	0.4472	1	0.381844	0.558223
831	lcl|c226613_g4_i1|m.11622	313	2	1	5	2	3	1	7	2	3	1	1	2	4	2	2	2	5	4	-0.458	-1.6033	8e-06	0.604375	0
832	lcl|c226629_g1_i3|m.11641	324	0	0	0	1	0	0	1	2	0	0	0	1	1	1	0	0	0	1	0.238	0.5827	0.966645	0.250806	0.585613
833	lcl|c226683_g4_i10|m.11705	123	0	0	0	0	0	0	0	0	0	0	0	0	0	0	0	2	0	1	0.214	0.5095	0.999326	0.321169	0.57276
834	lcl|c226705_g1_i7|m.11718	239	0	0	0	0	1	6	0	2	0	0	0	1	0	0	0	3	0	0	0.685	1.7956	0.000112	4e-06	0.565302
835	lcl|c226705_g1_i7|m.11719	221	0	0	0	0	0	2	0	0	0	0	0	1	0	0	0	1	0	0	0.211	0.4719	1	0.357949	0.564395
836	lcl|c226715_g5_i2|m.11728	472	3	3	5	5	8	2	4	3	6	2	4	3	1	1	1	0	2	2	-0.258	-0.9085	0.026458	0.667826	0.001614
837	lcl|c226723_g5_i2|m.11731	155	12	14	18	14	18	15	13	12	14	14	17	16	11	19	14	14	15	13	0.16	1.2216	0.062496	0.0037	0.58781
838	lcl|c226739_g4_i2|m.11743	391	0	2	0	2	1	2	0	2	1	2	1	1	1	2	0	2	0	1	0.615	1.6588	0.000724	2.8e-05	0.570069
839	lcl|c226769_g3_i1|m.11767	455	27	23	42	20	40	15	34	18	36	7	39	17	39	15	40	17	36	12	-0.673	-6.8193	0	0.51364	0
840	lcl|c226774_g3_i2|m.11777	149	3	2	12	11	8	2	11	7	3	1	10	8	4	2	8	8	8	11	-0.082	-0.4445	0.523681	0.721082	0.056595
841	lcl|c226786_g3_i2|m.11789	1082	0	0	0	1	0	0	0	2	0	0	0	1	0	0	0	0	0	1	0.141	0.3275	1	0.489482	0.519671
842	lcl|c226799_g3_i10|m.11796	368	0	1	0	2	0	1	0	3	0	1	2	1	0	2	2	2	0	0	0.307	0.8212	0.62789	0.079417	0.60159
843	lcl|c226873_g1_i5|m.11881	127	1	2	0	1	0	1	1	0	0	1	0	0	0	3	0	1	3	6	0.55	1.4683	0.006581	0.000285	0.577012
844	lcl|c226898_g4_i1|m.11913	135	0	0	0	1	0	0	1	0	0	0	1	1	0	0	1	0	1	0	0.114	0.2619	1	0.539962	0.491719
845	lcl|c226903_g2_i4|m.11918	104	1	1	1	1	1	0	4	1	3	1	2	1	1	2	3	0	2	0	-0.393	-1.0224	0.009259	0.654309	0.000517
846	lcl|c226904_g2_i1|m.11919	231	0	0	1	0	1	1	1	1	1	1	1	0	2	0	1	0	2	1	-0.037	-0.0902	0.981028	0.698849	0.261739
847	lcl|c226917_g1_i2|m.11940	524	0	1	0	1	1	1	1	1	0	2	0	0	0	0	1	0	0	0	0.185	0.4385	1	0.390173	0.555915
848	lcl|c226971_g4_i11|m.11980	176	1	1	1	0	1	0	1	1	1	0	0	0	1	0	1	1	0	0	0.088	0.1989	0.999807	0.58179	0.459927
849	lcl|c226971_g4_i9|m.11985	796	2	1	3	2	4	2	6	0	2	0	5	2	1	2	5	1	7	1	-0.815	-2.5677	0	0.556699	0
850	lcl|c226978_g9_i3|m.11996	123	11	8	17	13	14	6	13	3	14	4	25	9	11	1	16	4	17	8	-0.739	-4.8706	0	0.521517	0
851	lcl|c226990_g1_i2|m.12024	171	2	5	3	6	3	4	4	3	2	4	5	9	4	7	2	7	4	3	0.642	2.7599	0	0	0.539126
852	lcl|c226999_g3_i5|m.12032	898	0	0	1	1	0	0	0	1	0	0	1	7	1	3	1	0	0	2	0.681	1.8245	7.4e-05	3e-06	0.56429
853	lcl|c227009_g2_i1|m.12051	199	0	0	0	0	0	0	2	0	0	0	0	0	0	1	0	0	0	0	-0.015	-0.0355	0.995657	0.684785	0.303233
854	lcl|c227059_g2_i7|m.12097	741	0	0	0	0	0	1	0	0	1	1	0	0	0	2	0	0	0	1	0.154	0.3676	1	0.455375	0.534288
855	lcl|c227063_g4_i1|m.12098	270	0	0	2	0	1	2	0	1	0	1	2	3	1	1	3	2	4	2	-0.001	-0.0019	0.999825	0.674445	0.32844
856	lcl|c227069_g2_i12|m.12102	771	32	56	35	38	29	44	48	85	25	57	28	66	50	59	27	69	44	58	0.677	10.2318	0	0	0.51135
857	lcl|c227069_g2_i9|m.12105	269	8	28	13	18	11	22	18	48	11	33	6	34	18	34	9	26	16	24	1.057	9.6941	0	0	0.511741
858	lcl|c227073_g3_i1|m.12111	216	0	0	1	0	1	0	1	0	1	0	0	1	0	0	0	0	0	0	0.106	0.2538	1	0.545708	0.487906
859	lcl|c227080_g2_i3|m.12113	177	0	0	2	2	0	0	0	0	0	1	0	0	0	0	0	0	0	0	0.09	0.2073	1	0.576593	0.46445
860	lcl|c227084_g3_i4|m.12132	229	1	1	1	1	2	0	2	2	2	1	2	1	2	0	4	2	1	1	-0.233	-0.6302	0.213306	0.703018	0.016778
861	lcl|c227108_g1_i3|m.12161	253	0	1	1	1	0	2	1	0	1	2	0	1	0	2	0	1	0	0	0.403	1.0366	0.232197	0.018079	0.59644
862	lcl|c227111_g4_i1|m.12165	326	0	1	1	0	1	1	2	0	0	1	0	0	0	0	1	0	0	0	0.009	0.021	1	0.666632	0.345301
863	lcl|c227129_g2_i15|m.12185	454	8	4	5	6	12	6	14	7	10	5	17	12	9	3	11	9	7	8	-0.266	-1.641	4e-06	0.601847	0
864	lcl|c227136_g2_i8|m.12192	264	3	5	6	4	4	4	4	1	6	4	2	0	9	6	4	4	8	5	-0.11	-0.4709	0.47341	0.719218	0.048435
865	lcl|c227168_g5_i1|m.12205	387	0	0	1	0	3	0	0	0	0	0	0	0	0	0	1	0	2	0	-0.117	-0.283	0.80859	0.723778	0.129337
866	lcl|c227186_g4_i4|m.12220	263	0	0	4	5	1	0	0	0	1	0	1	0	4	0	0	0	0	0	-0.025	-0.0712	0.987404	0.694343	0.276151
867	lcl|c227188_g1_i1|m.12222	183	8	2	5	2	10	1	6	2	9	1	5	1	5	1	13	2	8	1	-1.45	-5.1078	0	0.519652	0
868	lcl|c227188_g1_i3|m.12224	232	2	5	7	5	4	3	5	4	6	1	2	2	4	2	7	5	4	3	-0.166	-0.6743	0.161785	0.697621	0.012065
869	lcl|c227202_g1_i3|m.12234	172	0	0	1	0	1	0	1	0	0	0	0	0	0	1	1	0	1	0	0.067	0.1566	1	0.606226	0.435841
870	lcl|c227206_g2_i7|m.12247	460	4	3	5	2	6	2	4	5	4	1	5	3	3	3	5	3	5	3	-0.315	-1.276	0.000625	0.629053	2.8e-05
871	lcl|c227210_g4_i5|m.12253	854	0	0	1	0	0	0	0	1	0	0	0	0	0	0	0	0	1	1	0.087	0.2043	1	0.578463	0.462845
872	lcl|c227266_g1_i1|m.12288	250	0	0	2	3	2	1	4	4	0	1	2	2	0	0	1	3	3	1	0.104	0.2988	1	0.512415	0.508075
873	lcl|c227267_g3_i2|m.12289	316	0	0	2	0	0	0	5	0	1	1	3	0	2	2	5	1	2	0	-0.605	-1.6693	3e-06	0.599981	0
874	lcl|c227282_g1_i10|m.12296	273	0	0	0	0	1	0	1	1	1	0	1	1	0	2	1	1	0	1	0.183	0.4468	1	0.382228	0.558119
875	lcl|c227289_g1_i2|m.12315	174	0	0	1	0	2	0	2	0	0	0	1	0	1	0	2	0	1	0	-0.166	-0.3919	0.623734	0.723767	0.075862
876	lcl|c227290_g1_i5|m.12317	154	0	1	0	1	0	0	0	1	1	0	1	1	0	0	0	1	1	1	0.129	0.2925	1	0.517276	0.505399
877	lcl|c227293_g2_i4|m.12320	194	2	4	4	4	6	4	4	2	6	5	5	6	5	6	7	5	8	4	0.009	0.0438	1	0.658222	0.361733
878	lcl|c227297_g1_i3|m.12321	135	1	1	4	2	3	0	3	0	1	0	1	0	2	0	2	0	3	1	-0.467	-1.3181	0.000378	0.625492	1.6e-05
879	lcl|c227322_g4_i4|m.12336	166	1	0	1	1	3	0	2	0	1	0	2	0	2	0	2	0	2	0	-0.407	-1.0165	0.0098	0.654979	0.00055
880	lcl|c227332_g2_i2|m.12341	389	40	24	52	29	43	22	50	27	39	22	58	30	53	22	51	33	44	29	-0.435	-5.3931	0	0.518389	0
881	lcl|c227361_g2_i9|m.12363	300	4	6	6	2	6	4	8	7	5	5	7	4	8	6	7	4	9	8	-0.105	-0.5211	0.381352	0.714898	0.03546
882	lcl|c227365_g1_i1|m.12366	980	0	1	0	1	0	0	0	0	0	0	0	0	1	0	0	0	0	0	0.058	0.1285	1	0.620909	0.418657
883	lcl|c227396_g2_i4|m.12400	168	0	0	1	0	0	0	1	0	0	0	0	0	0	0	0	0	1	0	0.073	0.1759	1	0.595432	0.447102
884	lcl|c227414_g2_i1|m.12410	532	1	3	4	2	4	4	3	3	3	2	3	3	2	2	4	3	4	3	0.031	0.1118	1	0.629069	0.408017
885	lcl|c227486_g1_i2|m.12483	189	0	1	0	0	0	0	0	0	0	1	0	0	0	0	0	0	0	0	0.077	0.1797	0.999942	0.593236	0.449265
886	lcl|c227531_g4_i11|m.12520	245	5	8	5	4	3	5	7	5	8	5	9	6	11	9	8	7	11	9	0.04	0.2336	1	0.559566	0.478046
887	lcl|c227533_g4_i2|m.12539	532	0	0	1	0	0	0	1	0	0	0	0	0	1	0	0	0	1	0	0.075	0.169	0.999829	0.599357	0.443127
888	lcl|c227537_g2_i4|m.12549	637	4	1	3	0	2	0	6	0	2	0	3	0	3	1	3	0	2	0	-0.961	-2.6055	0	0.555637	0
889	lcl|c227543_g1_i1|m.12562	429	4	3	6	4	4	4	3	2	1	3	9	9	4	3	6	4	6	4	-0.032	-0.14	0.956529	0.708814	0.224483
890	lcl|c227543_g1_i4|m.12563	397	6	3	6	4	4	4	3	2	3	3	8	8	5	3	5	2	6	4	-0.198	-0.864	0.038806	0.673386	0.002447
891	lcl|c227548_g3_i11|m.12568	133	0	0	0	0	1	0	1	0	0	0	1	0	0	0	1	0	1	1	0.094	0.216	1	0.571088	0.469042
892	lcl|c227562_g6_i1|m.12582	260	39	23	39	33	36	23	47	33	42	19	36	31	31	27	32	20	38	23	-0.225	-2.5896	0	0.556078	0
893	lcl|c227564_g2_i6|m.12586	532	0	1	0	0	0	2	1	0	0	0	0	0	0	1	1	1	0	0	0.166	0.3802	1	0.444203	0.538513
894	lcl|c227565_g2_i7|m.12589	769	1	1	0	0	1	0	0	0	0	0	0	0	0	0	0	0	1	0	0.058	0.1317	1	0.619298	0.420661
895	lcl|c227571_g1_i1|m.12592	437	1	0	0	1	2	2	1	1	2	2	0	0	0	2	0	0	0	1	0.207	0.5479	0.986274	0.283801	0.580061
896	lcl|c227586_g2_i2|m.12601	705	1	0	0	0	1	0	1	4	0	0	0	1	0	0	0	0	0	0	0.312	0.7507	0.761033	0.117872	0.6002
897	lcl|c227622_g3_i13|m.12621	385	0	0	1	0	0	0	0	0	0	0	0	0	0	1	0	1	0	0	0.088	0.2	0.999883	0.581116	0.460524
898	lcl|c227646_g4_i2|m.12636	343	0	0	0	0	0	0	0	0	0	0	0	0	0	0	1	1	1	1	0.07	0.1589	1	0.604971	0.437207
899	lcl|c227657_g3_i1|m.12650	192	8	9	9	10	13	12	7	6	9	5	14	9	12	6	10	7	10	9	-0.062	-0.3857	0.635375	0.723982	0.07841
900	lcl|c227683_g10_i1|m.12674	266	0	0	3	0	1	0	0	0	0	0	0	0	0	0	0	0	0	0	-0.045	-0.105	0.97499	0.702086	0.250563
901	lcl|c227702_g4_i1|m.12691	204	3	3	4	2	4	2	3	2	3	2	4	1	4	1	5	1	3	0	-0.592	-2.0379	0	0.578245	0
902	lcl|c227720_g2_i2|m.12706	256	1	1	1	1	1	1	1	0	1	0	1	1	1	0	3	1	2	1	-0.178	-0.4226	0.565523	0.722378	0.064115
903	lcl|c227721_g2_i2|m.12707	197	2	3	2	2	4	2	4	3	2	2	1	2	3	2	1	3	4	3	0.093	0.3327	1	0.485191	0.521669
904	lcl|c227726_g1_i1|m.12708	228	0	1	0	0	0	0	0	1	0	1	0	1	0	1	0	1	0	2	0.173	0.4305	1	0.39778	0.553728
905	lcl|c227738_g1_i4|m.12717	147	0	1	1	0	1	0	2	1	0	1	1	0	0	0	0	0	1	0	0.048	0.1122	1	0.628878	0.408276
906	lcl|c227758_g2_i4|m.12736	767	3	4	10	5	10	3	8	2	7	3	6	7	5	2	6	5	5	1	-0.455	-2.1256	0	0.57382	0
907	lcl|c227772_g1_i1|m.12754	161	13	14	15	11	12	3	15	9	15	4	14	13	19	8	15	18	15	15	-0.184	-1.4482	7.1e-05	0.61533	3e-06
908	lcl|c227780_g2_i3|m.12767	229	2	2	4	4	2	2	2	1	5	3	2	2	2	1	2	2	1	0	-0.037	-0.1191	0.968286	0.704952	0.239985
909	lcl|c227794_g1_i1|m.12770	442	3	3	4	2	6	1	5	4	3	1	2	4	1	1	3	1	3	1	-0.344	-1.1564	0.002381	0.6401	0.000118
910	lcl|c227804_g2_i3|m.12774	308	0	0	2	0	1	0	0	0	0	0	2	0	0	0	0	0	2	0	-0.165	-0.4179	0.574562	0.722625	0.065822
911	lcl|c227822_g3_i4|m.12810	374	0	0	0	0	0	0	0	0	0	0	0	0	0	0	0	1	0	1	0.061	0.1352	1	0.617517	0.422838
912	lcl|c227847_g4_i2|m.12829	308	0	0	1	0	0	0	0	0	2	0	1	0	1	0	1	0	2	1	-0.083	-0.1964	0.912756	0.717019	0.184247
913	lcl|c227852_g1_i7|m.12835	188	0	1	1	0	1	2	1	2	0	1	0	0	0	0	0	0	0	0	0.284	0.6712	0.881636	0.17413	0.595587
914	lcl|c227856_g7_i5|m.12838	158	1	1	2	2	1	1	1	1	1	1	1	2	1	1	1	1	0	1	0.196	0.4681	1	0.361645	0.563482
915	lcl|c227887_g3_i2|m.12871	160	0	2	0	2	0	2	1	2	0	1	0	5	0	1	1	4	1	4	0.983	2.6759	0	0	0.540869
916	lcl|c227910_g4_i10|m.12878	360	1	3	10	5	7	3	12	11	3	0	7	2	3	2	6	6	11	6	-0.254	-1.2675	0.00069	0.629791	3.1e-05
917	lcl|c227927_g4_i1|m.12894	353	1	1	2	3	2	3	2	1	4	1	4	2	3	1	5	1	5	3	-0.371	-1.2538	0.000809	0.630995	3.7e-05
918	lcl|c227928_g1_i1|m.12895	125	3	0	0	1	0	1	1	0	0	0	0	0	2	2	5	4	2	2	-0.08	-0.2232	0.885279	0.719833	0.166231
919	lcl|c227928_g3_i2|m.12898	238	1	1	3	1	8	1	4	1	5	0	1	0	4	0	4	1	5	1	-1.096	-3.1328	0	0.544019	0
920	lcl|c227928_g3_i2|m.12899	143	2	1	2	1	2	0	1	0	3	0	1	0	2	0	1	1	2	0	-0.424	-1.058	0.00654	0.650343	0.000355
921	lcl|c227928_g3_i7|m.12901	268	3	2	4	3	9	1	5	2	5	1	2	0	5	1	4	2	6	2	-0.815	-2.8884	0	0.548984	0
922	lcl|c227939_g2_i2|m.12910	265	4	10	7	7	7	2	12	8	6	11	5	6	9	5	3	7	10	7	0.168	0.9806	0.319284	0.027609	0.598639
923	lcl|c227957_g2_i7|m.12923	709	0	1	1	1	1	1	1	1	0	0	1	2	0	1	1	2	0	0	0.227	0.5361	0.99141	0.295209	0.577952
924	lcl|c227969_g5_i2|m.12934	168	15	12	17	10	14	15	17	8	19	12	18	9	19	13	22	11	17	12	-0.274	-2.2534	0	0.567946	0
925	lcl|c227993_g1_i6|m.12952	475	3	8	9	14	10	10	8	8	20	7	8	7	15	8	18	16	16	7	-0.071	-0.4716	0.472097	0.719165	0.048232
926	lcl|c228029_g3_i2|m.12983	320	0	0	0	0	0	0	0	1	0	0	0	0	0	0	1	0	0	0	0.101	0.2368	1	0.557416	0.479642
927	lcl|c228038_g3_i1|m.12994	151	4	1	4	3	2	1	2	0	2	0	4	1	1	0	4	0	1	1	-0.6	-1.6216	6e-06	0.603142	0
928	lcl|c228056_g1_i3|m.13005	230	1	1	3	4	3	2	3	3	4	1	2	1	3	1	4	6	2	1	-0.071	-0.2339	0.873068	0.720771	0.159278
929	lcl|c228056_g1_i4|m.13006	230	1	2	5	5	5	2	4	4	4	2	3	1	3	1	5	4	4	1	-0.263	-0.9753	0.014461	0.659755	0.000839
930	lcl|c228078_g1_i1|m.13021	176	0	0	1	0	1	1	0	0	0	0	0	0	0	0	1	0	0	0	0.121	0.2663	1	0.536795	0.493756
931	lcl|c228092_g3_i1|m.13033	369	2	1	0	1	1	0	2	3	3	1	0	1	2	1	1	2	1	0	-0.044	-0.1146	0.970526	0.70406	0.243352
932	lcl|c228113_g1_i1|m.13052	411	3	3	10	6	3	3	7	7	5	1	3	2	1	2	5	3	1	1	-0.168	-0.6678	0.168764	0.69843	0.012679
933	lcl|c228121_g2_i2|m.13058	350	4	5	3	0	9	3	6	2	4	3	6	6	4	2	8	8	3	7	-0.068	-0.3016	0.780606	0.724392	0.118902
934	lcl|c228124_g2_i1|m.13060	192	0	1	0	0	0	0	0	1	0	0	0	0	0	0	0	0	0	0	0.081	0.1939	0.999968	0.584829	0.457195
935	lcl|c228151_g1_i2|m.13084	281	1	0	1	1	1	0	0	0	1	0	0	1	0	1	1	1	1	1	0.093	0.22	1	0.568514	0.471122
936	lcl|c228175_g2_i1|m.13095	1436	0	1	0	0	0	0	0	0	0	0	1	0	0	0	0	0	0	0	0.024	0.055	1	0.65385	0.369653
937	lcl|c228205_g4_i2|m.13127	226	1	2	4	2	2	3	2	3	2	1	3	3	2	3	3	5	3	2	0.223	0.8015	0.666807	0.089088	0.601418
938	lcl|c228207_g1_i1|m.13128	756	0	1	0	0	1	0	0	0	0	0	0	0	0	0	0	0	0	0	0.033	0.0738	1	0.64614	0.382701
939	lcl|c228221_g2_i9|m.13137	967	21	17	26	20	32	13	37	12	22	7	19	13	20	12	27	17	31	18	-0.435	-3.8777	0	0.533001	0
940	lcl|c228244_g5_i1|m.13157	345	11	8	5	3	17	11	21	13	15	8	1	3	10	9	21	14	13	14	-0.152	-1.0574	0.006579	0.650409	0.000357
941	lcl|c228247_g2_i1|m.13162	706	1	0	0	0	0	1	0	0	0	0	0	2	0	0	0	0	0	0	0.14	0.3541	1	0.467112	0.529568
942	lcl|c228278_g3_i2|m.13197	394	0	0	0	0	0	0	0	0	0	0	0	2	0	0	0	0	0	0	0.183	0.4281	1	0.400052	0.55306
943	lcl|c228300_g4_i1|m.13216	616	4	6	4	7	8	4	10	5	9	6	9	4	8	4	4	6	6	3	-0.169	-0.8419	0.04665	0.676189	0.002991
944	lcl|c228309_g1_i2|m.13220	196	1	2	1	1	1	1	4	4	1	0	1	0	1	1	2	0	2	0	0.06	0.156	1	0.606552	0.435484
945	lcl|c228309_g1_i6|m.13221	556	2	3	2	1	1	1	5	5	1	0	3	2	3	2	3	0	2	0	-0.149	-0.4932	0.431768	0.717414	0.042277
946	lcl|c228317_g4_i1|m.13231	201	4	2	5	3	3	4	9	4	4	1	4	5	6	2	5	3	6	6	-0.259	-1.1932	0.001599	0.636543	7.7e-05
947	lcl|c228325_g7_i1|m.13245	190	0	0	1	0	0	0	0	5	0	0	0	0	0	0	0	0	0	1	0.48	1.2181	0.064271	0.003823	0.587977
948	lcl|c228330_g5_i1|m.13250	356	0	0	0	0	0	0	0	0	0	0	0	0	2	0	0	0	6	0	-0.323	-0.8001	0.065298	0.681543	0.004325
949	lcl|c228343_g4_i4|m.13280	1114	0	0	0	0	0	1	0	0	0	0	0	1	0	0	0	1	0	1	0.081	0.1956	0.999924	0.5838	0.458127
950	lcl|c228374_g2_i1|m.13291	228	1	1	1	1	2	0	2	1	2	1	2	2	1	1	3	1	1	1	-0.28	-0.7262	0.113556	0.69105	0.008024
951	lcl|c228380_g1_i2|m.13296	215	0	0	0	0	0	0	1	0	0	0	1	0	1	0	2	1	0	0	-0.006	-0.0139	0.998846	0.678291	0.319489
952	lcl|c228390_g1_i2|m.13299	570	0	2	4	3	2	1	2	1	3	1	5	1	2	1	3	1	4	2	-0.528	-1.5802	1.1e-05	0.605947	0
953	lcl|c228406_g1_i6|m.13304	299	1	1	6	2	5	1	1	2	3	0	2	2	2	8	1	1	4	1	-0.085	-0.2798	0.813155	0.723645	0.131184
954	lcl|c228451_g2_i1|m.13337	252	0	0	0	0	0	0	0	0	1	1	0	0	1	0	0	0	1	0	0.109	0.2517	1	0.547181	0.486905
955	lcl|c228453_g2_i2|m.13342	106	0	0	4	1	2	0	2	0	1	0	2	0	1	0	1	0	1	0	-0.321	-0.824	0.05398	0.678475	0.003509
956	lcl|c228461_g1_i2|m.13347	301	0	1	2	1	1	0	2	1	1	1	1	0	1	0	1	0	1	0	-0.087	-0.1976	0.911611	0.717159	0.183423
957	lcl|c228479_g4_i1|m.13361	630	0	1	0	1	1	0	0	1	1	1	2	0	1	0	1	1	1	1	-0.016	-0.0391	0.995061	0.685815	0.300511
958	lcl|c228497_g4_i2|m.13372	297	0	0	0	0	0	0	1	0	0	0	0	0	2	0	0	0	0	0	0.005	0.012	1	0.669777	0.338713
959	lcl|c228506_g1_i2|m.13379	474	3	1	8	3	8	0	8	2	6	0	7	1	6	1	7	0	6	2	-1.271	-4.3754	0	0.527337	0
960	lcl|c228524_g1_i1|m.13396	300	1	1	1	1	2	0	2	1	3	0	1	0	2	0	1	1	2	1	-0.365	-0.9465	0.018842	0.663189	0.001118
961	lcl|c228525_g4_i3|m.13399	504	3	2	3	1	4	3	4	3	1	4	5	3	2	3	5	4	5	2	-0.108	-0.4217	0.567248	0.722426	0.06444
962	lcl|c228527_g1_i1|m.13403	173	0	0	0	1	0	1	2	0	1	0	0	0	0	0	1	0	0	0	-0.023	-0.0547	0.991789	0.690105	0.288684
963	lcl|c228529_g1_i1|m.13404	353	4	2	9	5	9	6	6	3	9	2	11	3	8	2	15	4	11	2	-0.856	-3.8808	0	0.532964	0
964	lcl|c228543_g5_i2|m.13413	375	2	2	1	1	3	2	4	2	3	0	3	0	3	0	2	0	6	1	-0.636	-1.7853	0	0.592613	0
965	lcl|c228577_g3_i1|m.13439	356	0	0	0	0	0	1	0	0	1	1	0	0	1	3	0	0	0	1	0.27	0.6297	0.928071	0.208516	0.59161
966	lcl|c228583_g3_i2|m.13440	202	3	8	9	7	9	4	12	9	9	6	7	6	5	5	8	8	9	8	0.002	0.009	1	0.670803	0.336505
967	lcl|c228583_g6_i1|m.13441	491	43	53	54	50	53	43	60	45	39	42	47	56	59	50	57	56	56	65	0.143	2.1585	0	0	0.553187
968	lcl|c228588_g1_i6|m.13448	160	0	0	0	0	0	0	0	0	0	0	0	2	0	0	0	0	0	2	0.295	0.7185	0.814466	0.139037	0.598768
969	lcl|c228608_g2_i2|m.13456	420	0	0	0	0	0	0	5	0	0	0	1	0	0	0	0	0	1	0	-0.196	-0.4636	0.487238	0.719765	0.050595
970	lcl|c228611_g1_i2|m.13461	119	1	1	4	2	0	1	3	1	0	1	2	3	2	2	1	4	2	3	0.217	0.6573	0.898506	0.185297	0.594385
971	lcl|c228611_g7_i1|m.13463	400	2	6	4	3	1	4	3	9	1	6	3	6	2	10	0	6	5	6	1.038	4.5326	0	0	0.519653
972	lcl|c228621_g3_i1|m.13469	135	0	0	0	1	1	0	1	0	0	0	0	0	0	0	0	1	0	0	0.103	0.2371	1	0.557214	0.479791
973	lcl|c228623_g6_i3|m.13470	269	0	0	0	1	1	0	2	0	0	0	3	0	2	0	3	0	1	0	-0.361	-0.9618	0.016384	0.661355	0.00096
974	lcl|c228653_g2_i5|m.13498	486	0	1	2	2	2	2	2	2	5	1	2	1	3	1	2	1	2	3	-0.223	-0.6611	0.176169	0.699259	0.013339
975	lcl|c228653_g2_i7|m.13499	354	0	1	1	3	2	2	2	2	4	1	2	1	3	1	1	1	2	3	-0.038	-0.1141	0.970769	0.70396	0.243727
976	lcl|c228665_g3_i2|m.13504	248	1	0	0	0	4	0	5	0	0	2	3	3	4	2	6	2	4	3	-0.4	-1.3055	0.00044	0.626541	1.9e-05
977	lcl|c228666_g1_i2|m.13507	218	1	1	12	2	9	0	8	1	1	0	13	2	4	1	5	1	9	2	-1.386	-4.6405	0	0.524167	0
978	lcl|c228682_g2_i2|m.13534	813	0	0	0	0	0	0	0	0	0	0	0	1	0	1	0	0	0	1	0.1	0.2199	1	0.568579	0.471071
979	lcl|c228700_g2_i2|m.13570	222	0	0	1	0	0	0	2	0	0	0	0	0	0	0	0	0	1	0	0.013	0.0291	1	0.663718	0.351183
980	lcl|c228709_g4_i2|m.13577	159	3	2	2	2	3	1	3	1	3	1	2	1	2	0	4	0	2	0	-0.589	-1.7233	1e-06	0.596494	0
981	lcl|c228728_g1_i4|m.13597	471	2	3	4	3	5	4	4	3	0	3	3	2	1	2	3	3	5	4	0.118	0.4486	1	0.380499	0.558588
982	lcl|c228742_g3_i1|m.13609	150	1	1	1	1	1	0	1	1	1	0	0	0	1	0	1	0	0	1	0.091	0.2196	1	0.568773	0.470915
983	lcl|c228746_g2_i5|m.13610	502	3	2	3	5	3	3	5	7	4	3	4	3	4	4	5	2	6	2	-0.018	-0.0734	0.986742	0.694886	0.27448
984	lcl|c228746_g3_i3|m.13615	501	4	0	4	4	2	0	6	2	3	0	5	3	2	0	5	3	5	2	-0.502	-1.8598	0	0.588132	0
985	lcl|c228772_g4_i5|m.13636	598	11	18	16	13	18	14	22	23	17	10	11	9	10	9	16	10	16	14	0.031	0.247	1	0.55045	0.484643
986	lcl|c228778_g1_i1|m.13644	342	1	2	0	1	1	2	1	1	1	0	1	1	1	1	1	0	2	1	0.216	0.5495	0.985572	0.282261	0.580338
987	lcl|c228789_g1_i1|m.13647	461	2	3	8	6	7	6	12	11	4	6	4	5	5	6	3	9	7	11	0.352	1.9881	6e-06	0	0.55861
988	lcl|c228794_g3_i8|m.13650	497	0	1	0	0	0	1	0	0	0	0	1	1	0	1	1	0	0	1	0.088	0.1944	0.999958	0.584527	0.457469
989	lcl|c228815_g2_i1|m.13678	308	0	0	0	1	0	0	0	0	0	0	0	0	0	0	0	1	0	0	0.068	0.153	1	0.608174	0.433692
990	lcl|c228825_g1_i1|m.13684	617	5	9	12	8	13	8	15	12	13	9	18	15	17	15	23	18	20	12	-0.09	-0.6729	0.163268	0.697795	0.012195
991	lcl|c228830_g2_i1|m.13692	262	2	7	2	6	4	3	5	4	5	4	1	4	2	3	2	0	4	5	0.45	1.8665	4e-05	2e-06	0.562818
992	lcl|c228833_g2_i1|m.13698	204	0	1	0	0	0	0	0	0	0	0	0	0	0	1	2	0	0	0	0.001	0.0021	0.999975	0.673125	0.331408
993	lcl|c228847_g1_i2|m.13712	355	0	0	0	0	0	0	0	0	0	0	0	0	1	0	0	0	1	0	0.088	0.1931	0.99998	0.585311	0.456755
994	lcl|c228854_g2_i6|m.13724	516	0	1	2	1	0	1	1	0	0	1	0	1	1	1	0	0	0	2	0.108	0.2441	1	0.552447	0.483234
995	lcl|c228864_g3_i2|m.13732	444	3	16	75	44	79	57	39	45	18	19	79	59	16	15	72	73	48	42	0.022	0.3137	1	0.50067	0.514216
996	lcl|c228868_g10_i1|m.13735	171	0	1	2	0	7	0	5	0	4	0	3	1	4	0	4	0	4	0	-1.06	-3.0765	0	0.545136	0
997	lcl|c228869_g1_i2|m.13736	285	0	0	1	1	0	0	1	0	0	0	0	0	0	0	0	1	1	0	0.071	0.1643	1	0.601989	0.440388
998	lcl|c228904_g1_i5|m.13760	420	5	7	1	0	4	4	9	13	3	6	6	8	5	5	6	9	8	6	0.36	1.9319	1.5e-05	1e-06	0.560537
999	lcl|c228917_g5_i9|m.13783	768	0	0	1	0	0	0	2	0	1	1	0	0	1	0	0	0	0	0	-0.044	-0.1033	0.975733	0.701726	0.251843
1000	lcl|c228938_g1_i7|m.13803	402	0	0	0	0	0	0	1	0	0	0	0	0	0	1	1	0	0	0	0.077	0.1783	0.999978	0.594048	0.44847
1001	lcl|c228940_g3_i1|m.13807	207	0	1	0	3	1	2	2	3	0	2	5	12	0	2	1	10	2	6	1.079	3.8743	0	0	0.52375
1002	lcl|c228945_g3_i2|m.13809	275	5	5	6	10	8	3	5	5	2	4	5	8	6	6	8	7	10	10	0.206	1.064	0.195832	0.014555	0.595249
1003	lcl|c228955_g3_i2|m.13813	368	1	2	9	3	11	7	6	6	6	4	1	8	4	4	2	6	2	1	0.147	0.669	0.88448	0.175873	0.595405
1004	lcl|c228994_g6_i1|m.13852	154	3	8	9	6	7	5	3	3	6	2	6	11	9	4	3	4	9	3	-0.02	-0.1034	0.97569	0.701748	0.251768
1005	lcl|c229000_g3_i3|m.13860	120	0	0	0	0	1	0	1	0	0	0	0	0	0	0	0	0	0	0	0.073	0.1632	1	0.6026	0.439743
1006	lcl|c229012_g1_i8|m.13875	285	2	0	6	0	1	0	4	1	3	0	3	1	3	0	5	1	3	1	-0.981	-2.6667	0	0.554026	0
1007	lcl|c229017_g1_i1|m.13879	454	3	0	0	1	5	2	3	2	7	3	3	2	3	3	5	1	2	1	-0.517	-1.6667	3e-06	0.600151	0
1008	lcl|c229021_g1_i1|m.13887	468	0	0	0	0	0	0	0	0	0	1	0	1	1	2	0	0	0	0	0.161	0.391	1	0.434468	0.541999
1009	lcl|c229025_g3_i1|m.13888	182	0	0	1	0	0	0	0	0	1	1	1	0	2	2	0	2	2	1	0.108	0.2555	1	0.544511	0.488713
1010	lcl|c229032_g2_i1|m.13894	237	0	0	2	3	1	0	0	1	0	1	1	1	0	0	0	4	2	1	0.316	0.8225	0.625305	0.078807	0.601596
1011	lcl|c229032_g2_i3|m.13895	243	0	0	3	5	1	3	0	2	0	1	1	2	0	1	0	4	2	2	0.653	1.9222	1.7e-05	1e-06	0.560874
1012	lcl|c229041_g1_i1|m.13901	398	0	0	0	0	0	0	0	0	0	0	1	1	1	1	0	0	0	2	0.223	0.5189	0.997386	0.311969	0.574664
1013	lcl|c229055_g1_i1|m.13922	312	41	23	43	26	18	8	26	21	62	23	18	10	53	29	46	36	2	6	-0.373	-4.1203	0	0.530149	0
1014	lcl|c229056_g1_i4|m.13924	213	7	5	7	7	5	3	16	5	8	2	10	7	9	7	8	6	4	1	-0.394	-1.992	0	0.58068	0
1015	lcl|c229060_g1_i1|m.13927	596	2	0	1	0	0	1	0	0	2	0	1	0	0	0	1	0	0	0	-0.09	-0.2105	0.89886	0.718584	0.174666
1016	lcl|c229067_g1_i3|m.13935	233	3	1	3	0	2	2	3	3	4	3	3	2	3	2	3	2	3	2	-0.227	-0.7367	0.105329	0.689704	0.007369
1017	lcl|c229067_g1_i5|m.13937	119	1	1	1	1	1	1	2	1	1	1	1	1	1	3	1	3	1	3	0.517	1.3114	0.029358	0.001545	0.583622
1018	lcl|c229067_g1_i6|m.13938	234	4	2	4	1	3	3	5	4	5	4	4	3	4	5	4	5	4	5	0.023	0.1016	1	0.633853	0.401369
1019	lcl|c229073_g2_i1|m.13946	385	0	0	1	1	2	0	1	0	4	2	3	2	2	1	4	0	2	1	-0.422	-1.1598	0.002296	0.639765	0.000114
1020	lcl|c229089_g2_i5|m.13955	509	0	1	2	1	2	2	2	2	2	1	0	0	0	1	1	2	0	0	0.054	0.1374	1	0.616388	0.424199
1021	lcl|c229093_g1_i2|m.13957	207	0	0	2	0	1	0	0	0	0	0	0	1	0	1	0	0	0	1	-0.005	-0.0105	0.999201	0.677218	0.322032
1022	lcl|c229095_g1_i2|m.13958	456	1	1	1	0	1	1	2	1	1	1	0	0	0	2	2	1	0	1	-0.012	-0.0305	0.996564	0.683331	0.30701
1023	lcl|c229109_g1_i2|m.13969	603	0	4	2	7	4	6	5	6	2	2	5	6	2	3	2	4	4	7	0.649	2.7301	0	0	0.539741
1024	lcl|c229110_g2_i1|m.13970	436	3	2	6	2	5	3	3	3	3	3	4	2	4	1	6	2	7	1	-0.566	-2.0714	0	0.576519	0
1025	lcl|c229132_g1_i2|m.13984	548	3	0	5	2	5	0	11	3	3	0	3	1	0	1	2	2	4	6	-0.542	-1.9171	0	0.584823	0
1026	lcl|c229134_g1_i1|m.13988	358	3	1	2	3	3	1	1	1	1	0	1	1	2	2	1	1	2	2	-0.071	-0.2038	0.905537	0.717864	0.179191
1027	lcl|c229207_g3_i3|m.14046	388	1	6	2	6	4	5	5	2	3	4	1	4	2	2	3	5	3	9	0.732	2.8283	0	0	0.53773
1028	lcl|c229257_g3_i5|m.14100	145	1	1	0	0	0	0	0	0	1	0	0	0	1	1	0	0	0	0	0.082	0.197	0.999868	0.582949	0.458892
1029	lcl|c229261_g2_i4|m.14109	321	0	0	0	0	0	0	0	1	0	0	0	0	0	0	0	0	0	1	0.096	0.2131	0.999995	0.572936	0.467521
1030	lcl|c229298_g2_i1|m.14136	435	2	1	9	4	17	7	15	9	6	4	14	11	14	10	17	13	21	11	-0.314	-2.0263	0	0.578853	0
1031	lcl|c229310_g3_i5|m.14142	374	0	1	0	2	0	0	0	0	0	0	0	0	0	0	0	0	0	0	0.175	0.4056	1	0.421094	0.546519
1032	lcl|c229310_g3_i5|m.14143	140	2	1	1	3	0	2	0	2	0	1	1	5	0	0	0	2	1	2	0.707	1.92	1.8e-05	1e-06	0.56095
1033	lcl|c229340_g1_i1|m.14173	395	9	3	4	3	3	4	9	3	7	2	8	3	6	3	9	2	8	3	-0.72	-3.2224	0	0.542302	0
1034	lcl|c229342_g3_i2|m.14179	805	0	2	0	1	1	1	1	2	0	0	0	1	1	0	0	1	0	1	0.237	0.5665	0.976693	0.266026	0.583151
1035	lcl|c229348_g1_i1|m.14183	147	1	2	0	1	0	1	1	0	0	1	0	0	0	1	0	0	0	1	0.177	0.4082	1	0.418688	0.547301
1036	lcl|c229348_g3_i2|m.14185	140	0	0	0	0	0	0	0	0	1	0	1	0	0	0	0	0	1	0	0.104	0.2313	1	0.561101	0.476891
1037	lcl|c229351_g6_i1|m.14197	136	0	1	0	1	1	1	0	1	1	0	1	0	1	0	1	1	2	1	0.002	0.0056	1	0.671954	0.333997
1038	lcl|c229353_g1_i2|m.14200	307	0	1	0	0	0	0	0	0	0	0	0	0	0	0	1	0	0	0	0.105	0.2366	1	0.557551	0.479542
1039	lcl|c229422_g1_i2|m.14250	231	29	28	37	31	29	27	35	39	41	32	36	36	35	38	35	37	29	30	0.135	1.6438	0.000877	3.4e-05	0.570593
1040	lcl|c229422_g1_i9|m.14251	202	21	18	22	21	20	20	23	26	26	22	25	26	21	24	25	24	16	21	0.176	1.7148	0.000346	1.3e-05	0.568119
1041	lcl|c229426_g2_i2|m.14255	141	0	1	0	0	0	0	0	1	0	1	1	1	0	2	0	1	0	0	0.191	0.4313	1	0.397021	0.553949
1042	lcl|c229426_g2_i4|m.14256	196	2	1	0	1	0	0	1	0	1	1	1	1	1	1	1	1	0	1	0.022	0.0514	1	0.655272	0.367119
1043	lcl|c229445_g3_i3|m.14271	145	0	0	1	0	0	0	0	0	0	0	0	0	0	0	1	0	0	0	0.083	0.1943	0.99996	0.584587	0.457414
1044	lcl|c229461_g3_i2|m.14279	226	2	0	3	1	2	1	1	1	1	0	0	1	0	0	1	0	1	2	-0.147	-0.3535	0.693938	0.724714	0.092603
1045	lcl|c229482_g2_i3|m.14286	150	6	3	8	4	9	3	10	7	9	6	10	10	13	6	14	9	14	7	-0.339	-2.0427	0	0.577995	0
1046	lcl|c229503_g1_i3|m.14339	303	0	1	0	0	0	0	0	0	0	2	0	1	0	2	0	1	0	1	0.261	0.6233	0.934386	0.214086	0.59089
1047	lcl|c229503_g1_i5|m.14340	265	0	1	0	0	0	0	0	0	0	1	0	0	0	2	0	0	0	1	0.17	0.3717	1	0.451762	0.535681
1048	lcl|c229507_g2_i4|m.14343	387	0	0	1	1	0	0	1	0	1	1	2	3	1	2	1	1	1	2	0.344	0.9128	0.44403	0.044469	0.60066
1049	lcl|c229532_g3_i4|m.14360	436	36	42	61	61	51	43	65	50	48	32	58	65	60	39	54	73	66	63	0.103	1.5243	0.003616	0.000148	0.574881
1050	lcl|c229538_g7_i4|m.14373	442	2	2	4	2	4	2	7	2	3	3	2	3	3	3	1	1	5	2	-0.263	-0.9459	0.018945	0.663261	0.001124
1051	lcl|c229550_g1_i3|m.14392	450	22	13	18	13	28	13	33	15	17	13	30	22	22	14	32	25	30	18	-0.304	-2.8781	0	0.549201	0
1052	lcl|c229550_g1_i3|m.14393	235	10	11	7	9	11	12	20	14	11	9	19	16	11	10	15	20	19	15	0.1	0.7515	0.759656	0.117375	0.600229
1053	lcl|c229561_g1_i12|m.14408	590	11	7	20	14	11	4	15	6	10	8	13	12	11	5	17	7	10	11	-0.304	-2.0924	0	0.575459	0
1054	lcl|c229563_g2_i2|m.14411	651	0	0	3	0	0	0	0	0	0	1	0	0	0	0	0	1	0	0	-0.116	-0.2829	0.808733	0.723774	0.129394
1055	lcl|c229579_g3_i1|m.14426	186	4	3	4	4	4	5	5	6	3	2	7	7	7	3	7	7	6	3	-0.01	-0.0453	0.993871	0.687554	0.295815
1056	lcl|c229592_g3_i11|m.14442	600	3	1	0	1	1	1	3	1	0	0	3	1	4	1	7	2	3	1	-0.772	-2.3559	0	0.563774	0
1057	lcl|c229615_g3_i4|m.14451	643	2	4	7	7	5	6	13	6	3	3	6	9	6	5	2	7	9	11	0.236	1.191	0.079548	0.004906	0.589276
1058	lcl|c229625_g1_i5|m.14457	440	1	2	2	3	2	0	0	2	2	1	1	2	1	1	2	2	2	1	0.161	0.4722	1	0.357657	0.564467
1059	lcl|c229642_g3_i10|m.14473	251	0	0	0	1	2	1	0	1	1	1	1	0	1	1	0	0	0	0	0.043	0.1002	1	0.634498	0.400448
1060	lcl|c229670_g1_i2|m.14513	145	2	2	3	2	3	0	5	2	4	3	3	3	2	2	5	4	4	5	-0.077	-0.301	0.781551	0.724376	0.119231
1061	lcl|c229676_g1_i1|m.14524	349	5	5	11	6	8	3	13	4	9	3	14	3	11	5	14	5	10	5	-0.721	-3.7622	0	0.534413	0
1062	lcl|c229692_g2_i9|m.14545	398	0	0	0	0	2	0	1	2	0	0	0	0	0	0	0	1	0	0	0.096	0.2181	1	0.56974	0.470137
1063	lcl|c229735_g7_i1|m.14573	187	1	7	5	9	6	8	4	5	4	7	4	9	8	15	8	9	9	10	0.652	3.6604	0	0	0.525695
1064	lcl|c229751_g1_i2|m.14592	603	13	8	19	12	18	11	22	21	15	10	17	11	21	18	15	15	26	19	-0.108	-0.8966	0.029358	0.6693	0.001807
1065	lcl|c229768_g1_i6|m.14605	304	3	5	6	6	4	2	6	4	8	6	6	5	7	2	5	5	7	4	-0.123	-0.5713	0.297383	0.709768	0.025432
1066	lcl|c229776_g6_i2|m.14612	780	0	0	0	0	1	0	0	0	0	0	1	0	0	0	0	0	0	0	0.041	0.0891	1	0.639511	0.393072
1067	lcl|c229808_g4_i2|m.14641	664	0	0	1	0	1	1	0	0	1	0	1	0	1	0	1	0	0	0	0.102	0.2278	1	0.563419	0.47512
1068	lcl|c229833_g1_i3|m.14669	216	1	1	1	0	1	0	1	0	1	0	0	2	2	0	2	0	2	1	-0.046	-0.1111	0.972206	0.703352	0.245977
1069	lcl|c229874_g1_i3|m.14714	147	0	0	0	0	0	2	0	1	0	0	0	1	0	2	0	1	0	1	0.27	0.6047	0.950416	0.230627	0.588627
1070	lcl|c229881_g6_i6|m.14719	493	22	15	33	21	25	8	37	14	33	13	24	7	28	10	31	12	24	11	-0.668	-5.9686	0	0.515991	0
1071	lcl|c229886_g1_i1|m.14723	167	0	0	0	0	1	0	1	0	0	0	2	3	0	0	1	0	0	1	0.178	0.428	1	0.400146	0.553032
1072	lcl|c229886_g1_i2|m.14724	195	0	0	0	0	1	0	1	0	0	0	2	1	0	0	1	0	0	1	-0.027	-0.0638	0.989469	0.69248	0.281772
1073	lcl|c229886_g1_i6|m.14730	168	1	1	0	0	2	0	2	0	1	0	3	1	1	1	2	0	0	1	-0.281	-0.6927	0.143202	0.695311	0.010466
1074	lcl|c229904_g1_i2|m.14752	721	3	6	5	8	3	8	5	8	4	7	4	9	5	8	4	7	5	5	0.677	3.5868	0	0	0.526417
1075	lcl|c229913_g3_i1|m.14763	435	0	0	0	0	1	0	1	0	5	0	5	0	3	1	4	0	4	0	-0.802	-2.2736	0	0.567084	0
1076	lcl|c229917_g4_i4|m.14770	568	4	4	10	5	4	3	5	3	3	2	14	11	12	4	10	4	12	7	-0.383	-2.1129	0	0.574441	0
1077	lcl|c229919_g2_i1|m.14772	158	0	0	1	0	0	0	0	0	1	0	1	0	0	0	1	0	1	0	0.087	0.2104	1	0.574645	0.466097
1078	lcl|c229937_g4_i6|m.14792	574	0	0	0	1	0	0	0	0	0	0	0	1	0	0	0	0	0	0	0.086	0.2011	0.999949	0.580441	0.46112
1079	lcl|c229995_g2_i2|m.14841	477	0	1	0	1	1	1	1	2	1	0	0	1	1	1	0	1	0	1	0.166	0.3925	1	0.433105	0.542474
1080	lcl|c230000_g8_i2|m.14843	129	0	0	0	0	2	0	0	0	1	0	1	1	2	1	0	0	0	0	-0.037	-0.0837	0.983372	0.697352	0.266664
1081	lcl|c230011_g2_i5|m.14861	291	2	1	4	4	3	1	3	0	1	0	1	0	2	0	2	0	3	0	-0.326	-0.95	0.018252	0.662768	0.00108
1082	lcl|c230032_g6_i1|m.14874	120	0	0	1	0	0	0	2	1	0	0	1	1	2	0	2	0	3	1	-0.275	-0.6794	0.156476	0.696983	0.011602
1083	lcl|c230033_g1_i4|m.14876	316	0	0	0	0	0	0	0	0	1	0	1	1	0	0	0	0	0	0	0.069	0.1574	1	0.60579	0.436317
1084	lcl|c230034_g1_i1|m.14877	152	0	0	1	0	1	0	1	0	2	0	3	0	0	0	3	0	0	0	-0.316	-0.7715	0.081418	0.685226	0.005522
1085	lcl|c230039_g1_i2|m.14881	293	2	0	4	0	1	0	0	5	2	2	5	2	1	3	3	2	2	3	0.077	0.25	1	0.548368	0.48609
1086	lcl|c230054_g1_i7|m.14897	550	3	3	5	5	4	7	4	6	0	5	3	6	1	2	5	8	2	5	0.641	2.7069	0	0	0.540222
1087	lcl|c230065_g1_i2|m.14908	120	4	2	5	2	5	3	8	4	6	1	8	5	8	4	6	5	6	4	-0.452	-2.0634	0	0.576927	0
1088	lcl|c230073_g1_i10|m.14919	555	0	2	1	0	1	1	1	1	1	0	0	0	1	0	1	0	0	0	0.175	0.405	1	0.421648	0.546337
1089	lcl|c230102_g4_i1|m.14957	224	8	9	13	12	11	11	10	7	13	7	15	11	14	7	18	10	11	9	-0.136	-0.954	0.017598	0.662288	0.001038
1090	lcl|c230110_g2_i2|m.14961	1969	0	0	3	2	3	0	4	0	4	3	4	0	2	0	3	1	2	1	-0.586	-1.7792	0	0.592989	0
1091	lcl|c230124_g3_i6|m.14973	838	6	7	8	5	11	7	14	5	14	6	12	6	10	4	12	6	14	8	-0.438	-2.5674	0	0.556708	0
1092	lcl|c230136_g1_i1|m.14983	462	1	0	2	0	1	0	0	0	0	0	2	1	0	0	0	2	2	0	-0.045	-0.1065	0.974322	0.702401	0.249434
1093	lcl|c230150_g4_i2|m.14989	367	1	0	0	0	5	0	4	0	2	0	4	3	2	0	5	0	0	0	-0.594	-1.6976	2e-06	0.598141	0
1094	lcl|c230163_g1_i1|m.15005	339	3	3	2	3	4	3	4	4	6	3	3	2	3	3	3	5	3	4	0.132	0.5358	0.991539	0.2955	0.577897
1095	lcl|c230171_g1_i1|m.15015	207	1	0	0	0	2	0	1	0	0	0	0	0	0	0	1	0	1	0	0.027	0.0664	1	0.64923	0.377604
1096	lcl|c230175_g2_i2|m.15021	656	0	0	0	0	0	0	0	1	0	2	0	2	0	1	0	0	0	0	0.256	0.6249	0.932804	0.212687	0.591073
1097	lcl|c230178_g1_i2|m.15028	291	0	7	0	0	1	4	0	7	0	3	1	0	0	3	0	0	1	0	1.155	3.2318	0	0	0.530539
1098	lcl|c230184_g2_i3|m.15031	258	0	0	1	0	1	0	2	0	0	0	1	0	0	0	2	0	1	0	-0.067	-0.1589	0.943852	0.711918	0.210703
1099	lcl|c230186_g5_i1|m.15032	517	0	0	0	0	0	0	1	0	0	0	1	0	1	0	1	0	1	0	0.06	0.1387	1	0.615718	0.425001
1100	lcl|c230197_g3_i5|m.15044	143	3	1	2	1	3	0	2	0	5	0	1	2	3	1	4	3	2	1	-0.555	-1.7	2e-06	0.597986	0
1101	lcl|c230220_g1_i3|m.15065	191	0	1	0	1	0	1	0	1	0	0	0	0	0	0	0	0	0	1	0.102	0.2335	1	0.559633	0.477996
1102	lcl|c230220_g1_i6|m.15071	237	0	2	2	3	0	1	1	1	0	0	0	0	0	0	1	1	1	0	0.24	0.6065	0.949006	0.229004	0.588857
1103	lcl|c230270_g1_i2|m.15107	782	2	0	2	0	0	0	2	1	2	0	1	0	1	1	1	0	2	0	-0.323	-0.8168	0.057197	0.679398	0.003739
1104	lcl|c230276_g3_i1|m.15112	226	0	1	1	1	0	1	0	0	1	1	1	1	1	1	0	1	0	0	0.065	0.1492	1	0.61021	0.431406
1105	lcl|c230280_g4_i1|m.15118	203	0	1	1	1	1	0	0	1	2	1	0	0	1	3	1	0	1	0	0.201	0.4838	1	0.346339	0.567173
1106	lcl|c230296_g1_i2|m.15136	266	0	3	2	4	3	0	3	3	4	2	4	2	7	5	4	6	5	5	0.093	0.3702	1	0.453086	0.535174
1107	lcl|c230355_g4_i3|m.15198	234	11	9	19	11	19	12	20	15	17	8	17	14	25	20	21	15	27	11	-0.242	-2.0079	0	0.579828	0
1108	lcl|c230360_g10_i5|m.15205	379	2	1	2	1	1	1	2	2	1	2	1	1	0	1	1	1	1	2	0.065	0.1688	0.999843	0.59947	0.443011
1109	lcl|c230386_g2_i1|m.15223	386	0	1	2	2	2	1	2	1	3	1	6	1	2	2	4	0	2	1	-0.588	-1.6061	7e-06	0.604185	0
1110	lcl|c230398_g2_i10|m.15236	140	0	4	0	0	0	0	0	0	3	10	0	0	1	5	0	1	0	0	0.902	2.7441	0	0	0.539451
1111	lcl|c230398_g2_i4|m.15241	142	0	4	0	0	0	0	1	0	6	16	0	0	3	9	1	3	1	1	0.97	3.4056	0	0	0.528326
1112	lcl|c230398_g2_i8|m.15247	171	1	9	0	0	0	0	1	2	16	23	0	0	7	19	1	3	1	2	0.878	3.8187	0	0	0.524227
1113	lcl|c230405_g2_i9|m.15259	115	0	0	0	0	1	0	0	0	1	0	0	0	1	1	0	1	1	1	0.078	0.1719	0.999926	0.597717	0.444805
1114	lcl|c230406_g3_i1|m.15260	229	1	1	5	5	2	0	4	2	2	0	3	1	4	3	0	1	1	1	-0.184	-0.5821	0.280719	0.708581	0.023614
1115	lcl|c230412_g8_i4|m.15270	165	0	0	0	0	1	0	0	0	0	0	0	0	0	0	2	1	1	0	-0.031	-0.0718	0.987226	0.694492	0.275695
1116	lcl|c230414_g1_i1|m.15275	329	1	0	6	1	4	1	4	0	2	0	0	0	2	1	2	1	1	2	-0.598	-1.7084	1e-06	0.597446	0
1117	lcl|c230434_g3_i1|m.15297	255	0	1	0	0	0	0	0	0	0	0	0	0	0	0	0	0	0	1	0.103	0.2287	1	0.562825	0.475577
1118	lcl|c230481_g5_i1|m.15356	217	10	5	11	7	12	5	10	6	11	5	17	8	10	5	10	5	11	6	-0.507	-3.1049	0	0.54457	0
1119	lcl|c230498_g3_i2|m.15368	179	3	4	14	12	11	17	12	9	7	8	5	4	5	2	4	4	7	8	0.169	0.9623	0.351184	0.031523	0.599267
1120	lcl|c230632_g1_i6|m.15498	263	1	0	1	0	0	0	0	0	0	0	1	0	0	0	1	0	0	0	0.064	0.1477	1	0.611008	0.430499
1121	lcl|c230636_g2_i1|m.15503	271	1	2	3	3	4	3	1	1	4	4	3	2	2	2	2	5	2	3	0.261	1.0143	0.264881	0.021468	0.597359
1122	lcl|c230672_g2_i1|m.15530	341	0	1	1	1	1	1	1	1	3	1	1	0	1	0	0	1	1	1	-0.073	-0.1773	0.929597	0.714594	0.197559
1123	lcl|c230742_g3_i4|m.15574	406	0	0	0	1	0	0	1	0	0	0	0	0	0	0	0	0	0	0	0.087	0.2037	1	0.578835	0.462522
1124	lcl|c230758_g1_i1|m.15596	263	0	1	3	4	3	4	2	3	5	4	4	4	4	4	3	5	3	4	0.322	1.2826	0.037691	0.002059	0.58494
1125	lcl|c230771_g2_i1|m.15607	248	1	0	8	5	5	4	6	1	6	0	6	0	4	3	3	1	1	1	-0.583	-2.1563	0	0.572344	0
1126	lcl|c230792_g1_i1|m.15630	332	1	7	0	0	0	0	0	0	1	5	0	0	2	7	0	1	4	9	1.001	3.148	0	0	0.53181
1127	lcl|c230812_g4_i3|m.15653	518	0	0	0	2	0	0	0	0	0	0	0	0	0	0	1	0	0	0	0.16	0.3676	1	0.455375	0.534288
1128	lcl|c230823_g3_i1|m.15672	350	26	16	19	15	28	16	31	20	35	17	52	35	40	21	40	28	46	21	-0.347	-3.7986	0	0.533966	0
1129	lcl|c230829_g2_i2|m.15680	763	2	1	3	1	1	2	2	0	1	0	0	1	0	1	0	0	0	0	-0.144	-0.3753	0.654584	0.724291	0.082817
1130	lcl|c230862_g3_i1|m.15714	479	1	0	1	1	2	0	3	0	4	0	1	1	2	0	2	0	2	1	-0.52	-1.3889	0.000156	0.619823	6e-06
1131	lcl|c230880_g3_i5|m.15737	268	1	0	1	0	1	0	1	0	1	0	3	0	2	0	3	0	0	0	-0.292	-0.7011	0.135262	0.694249	0.0098
1132	lcl|c230944_g4_i1|m.15814	199	1	1	0	1	0	2	1	1	0	1	0	1	0	2	0	2	1	2	0.405	0.9715	0.334957	0.029502	0.598958
1133	lcl|c230960_g1_i5|m.15839	304	2	2	1	1	6	5	3	2	5	0	2	2	3	1	3	2	4	2	-0.307	-1.0573	0.006585	0.65042	0.000358
1134	lcl|c230982_g4_i7|m.15848	206	1	1	0	1	0	0	1	2	1	1	1	3	1	2	0	3	0	1	0.512	1.3662	0.01789	0.000877	0.5812
1135	lcl|c230991_g1_i1|m.15860	187	0	0	0	1	2	2	0	1	0	0	0	0	1	0	0	0	0	0	0.133	0.3064	1	0.506469	0.51124
1136	lcl|c231009_g5_i3|m.15884	1173	1	0	1	1	0	0	1	0	1	0	0	0	1	0	0	0	0	0	0.037	0.0865	1	0.640661	0.391326
1137	lcl|c231030_g9_i1|m.15904	395	0	0	1	0	0	0	1	0	0	1	0	0	0	0	0	0	0	0	0.042	0.1002	1	0.634498	0.400448
1138	lcl|c231043_g3_i4|m.15925	505	3	7	10	13	7	6	9	9	14	12	8	12	11	8	7	11	12	5	0.187	1.1517	0.107047	0.006969	0.591163
1139	lcl|c231052_g3_i3|m.15929	350	5	7	11	8	5	6	15	7	6	6	10	11	12	7	11	12	9	11	0.046	0.3134	1	0.50091	0.514095
1140	lcl|c231068_g6_i2|m.15939	583	40	34	66	49	56	30	71	40	58	23	56	34	52	31	74	43	50	38	-0.323	-4.8255	0	0.521985	0
1141	lcl|c231083_g2_i1|m.15952	313	0	0	0	1	0	0	0	0	1	0	1	0	1	0	0	0	0	0	0.089	0.1955	0.999927	0.583861	0.458073
1142	lcl|c231085_g3_i1|m.15955	220	7	1	6	1	9	0	6	2	6	0	20	2	10	0	12	1	11	2	-1.716	-5.9273	0	0.516193	0
1143	lcl|c231102_g1_i6|m.15966	192	0	0	0	0	1	0	0	0	0	0	1	0	0	0	1	0	0	0	0.102	0.2319	1	0.560702	0.477193
1144	lcl|c231142_g1_i4|m.15993	389	5	6	4	7	8	6	11	3	10	7	5	5	12	4	6	5	13	6	-0.216	-1.1855	0.00174	0.637275	8.4e-05
1145	lcl|c231190_g4_i3|m.16030	411	4	4	6	13	4	7	8	11	4	7	4	8	2	5	5	3	4	7	0.614	3.13	0	0	0.532102
1146	lcl|c231190_g4_i6|m.16031	350	5	5	6	12	6	7	12	13	4	7	5	9	2	4	5	3	6	8	0.441	2.4303	0	0	0.546195
1147	lcl|c231210_g4_i4|m.16042	202	4	2	6	3	3	5	4	6	3	6	3	4	3	4	5	6	4	4	0.282	1.2163	0.065201	0.003887	0.588063
1148	lcl|c231252_g2_i1|m.16075	227	0	0	0	0	0	0	1	0	0	0	2	1	1	1	1	1	0	0	-0.007	-0.0162	0.998564	0.679008	0.317766
1149	lcl|c231257_g1_i5|m.16082	423	0	6	1	3	4	4	3	5	5	5	1	4	3	7	0	2	2	5	0.778	3.0387	0	0	0.533673
1150	lcl|c231281_g6_i3|m.16097	137	28	17	30	19	30	14	35	25	31	12	27	18	29	15	37	24	36	16	-0.414	-4.0069	0	0.531454	0
1151	lcl|c231285_g1_i2|m.16098	374	0	0	0	0	0	0	1	0	0	0	0	0	1	0	0	0	1	0	0.114	0.2743	1	0.530954	0.497399
1152	lcl|c231313_g2_i1|m.16122	286	0	0	0	1	1	0	0	0	0	0	0	0	0	0	0	0	0	0	0.109	0.2557	1	0.54437	0.488808
1153	lcl|c231326_g2_i1|m.16129	332	0	2	3	5	3	1	6	3	3	3	2	2	2	3	3	2	6	2	-0.062	-0.232	0.875283	0.720612	0.160502
1154	lcl|c231339_g4_i2|m.16143	424	4	1	3	4	4	1	4	1	2	1	3	2	4	5	2	2	2	4	-0.148	-0.5065	0.407469	0.716248	0.038909
1155	lcl|c231341_g2_i3|m.16145	313	0	0	0	0	0	1	0	0	0	0	1	0	0	2	0	1	0	0	0.16	0.3877	1	0.437457	0.540947
1156	lcl|c231352_g2_i1|m.16156	246	5	14	7	14	4	10	8	15	5	13	7	16	6	14	15	16	8	14	0.801	5.3099	0	0	0.516566
1157	lcl|c231364_g6_i1|m.16162	433	2	2	0	1	8	3	5	2	5	1	6	2	6	2	7	0	9	3	-0.841	-2.8625	0	0.549531	0
1158	lcl|c231378_g1_i2|m.16165	1155	0	1	0	2	0	0	0	1	0	1	0	0	0	0	0	0	0	1	0.18	0.4024	1	0.424045	0.545547
1159	lcl|c231380_g1_i2|m.16168	107	0	2	0	0	0	0	1	0	2	3	0	0	2	5	1	0	1	0	0.505	1.3442	0.021896	0.001104	0.582158
1160	lcl|c231403_g3_i11|m.16209	130	0	1	0	1	0	0	0	0	0	1	0	0	0	0	0	0	0	0	0.139	0.3276	1	0.4894	0.51971
1161	lcl|c231430_g2_i1|m.16231	492	1	1	2	6	3	4	2	7	2	3	3	7	4	3	2	4	4	2	0.614	2.376	0	0	0.547459
1162	lcl|c231430_g2_i6|m.16242	528	4	11	13	20	12	11	11	13	7	8	7	13	10	11	6	9	7	8	0.456	2.9579	0	0	0.535174
1163	lcl|c231440_g4_i2|m.16256	426	1	1	2	1	2	1	2	1	1	1	2	1	2	0	3	0	2	3	-0.28	-0.8104	0.060194	0.680219	0.003954
1164	lcl|c231445_g1_i1|m.16259	328	0	0	0	2	1	1	0	2	0	0	0	1	0	1	0	0	0	0	0.263	0.6568	0.899101	0.185706	0.594339
1165	lcl|c231460_g1_i4|m.16283	127	0	0	1	0	2	0	1	0	0	0	2	3	2	1	1	0	3	3	0.074	0.2152	1	0.571599	0.468623
1166	lcl|c231462_g1_i10|m.16284	425	0	1	0	3	2	2	0	1	0	1	1	1	2	2	0	1	0	2	0.331	0.8826	0.504019	0.054283	0.60124
1167	lcl|c231469_g3_i4|m.16290	279	1	3	1	2	3	3	3	4	2	2	4	3	3	2	6	5	2	3	0.2	0.7348	0.788127	0.12804	0.599562
1168	lcl|c231477_g1_i1|m.16301	377	13	16	10	18	18	12	19	13	17	16	14	17	20	16	21	20	20	25	0.165	1.4767	0.00603	0.000259	0.576686
1169	lcl|c231506_g1_i1|m.16344	344	2	2	1	1	0	1	1	1	1	0	0	0	1	0	1	1	0	1	0.051	0.1298	1	0.620256	0.419472
1170	lcl|c231559_g1_i5|m.16408	425	7	2	14	7	4	3	13	2	6	3	8	1	3	2	8	2	4	0	-0.878	-3.7475	0	0.534593	0
1171	lcl|c231575_g5_i2|m.16426	291	0	2	0	0	0	2	3	0	2	1	2	2	3	2	1	3	2	3	0.18	0.5543	0.983147	0.277653	0.581156
1172	lcl|c231577_g2_i2|m.16429	176	0	2	0	0	0	3	3	5	0	3	0	0	0	4	0	0	0	0	0.745	2.0808	2e-06	0	0.555564
1173	lcl|c231579_g2_i1|m.16430	130	0	0	0	1	0	1	0	0	0	0	0	2	0	1	0	0	0	0	0.214	0.489	1	0.341253	0.568349
1174	lcl|c231601_g3_i1|m.16437	117	0	1	1	1	1	2	0	1	1	1	1	1	1	1	1	0	0	1	0.263	0.655	0.901245	0.187181	0.594174
1175	lcl|c231602_g3_i14|m.16438	525	1	0	0	0	0	0	2	0	0	0	1	0	1	0	1	0	1	0	-0.038	-0.0927	0.980071	0.699413	0.259847
1176	lcl|c231615_g6_i2|m.16452	127	0	0	0	3	2	0	0	0	0	0	0	1	0	0	0	0	0	0	0.182	0.4639	1	0.365723	0.562457
1177	lcl|c231621_g3_i3|m.16453	264	0	0	1	2	0	1	0	0	0	0	1	1	0	0	0	0	2	3	0.276	0.6666	0.887515	0.177786	0.595203
1178	lcl|c231634_g1_i2|m.16472	1063	7	2	10	4	7	4	22	9	8	1	3	2	8	3	9	7	10	3	-0.702	-3.8264	0	0.533626	0
1179	lcl|c231634_g1_i5|m.16478	373	3	1	4	1	2	1	5	1	2	0	2	0	3	1	3	1	3	0	-0.891	-2.3741	0	0.563085	0
1180	lcl|c231694_g3_i2|m.16524	191	1	1	0	0	2	1	1	2	1	1	2	3	3	0	1	0	3	2	-0.01	-0.0284	0.996899	0.682711	0.308594
1181	lcl|c231698_g2_i1|m.16532	177	1	1	0	0	1	0	1	1	1	1	0	1	1	0	1	1	0	0	0.106	0.2548	1	0.545005	0.488381
1182	lcl|c231732_g6_i1|m.16569	347	0	0	0	1	1	0	2	3	0	0	0	0	0	0	0	0	0	1	0.151	0.3635	1	0.458966	0.532875
1183	lcl|c231737_g1_i3|m.16576	191	5	4	13	8	12	5	10	8	8	5	6	5	6	4	8	6	6	5	-0.21	-1.1394	0.00285	0.641793	0.000144
1184	lcl|c231738_g2_i1|m.16579	590	1	0	1	1	0	2	0	0	1	0	1	1	0	0	1	0	2	0	0.097	0.2459	1	0.551209	0.48411
1185	lcl|c231739_g1_i3|m.16580	253	1	2	8	3	5	2	4	1	3	1	6	1	3	0	4	2	2	1	-0.741	-2.4039	0	0.561992	0
1186	lcl|c231789_g3_i2|m.16623	804	1	1	1	4	3	4	0	2	0	0	1	5	0	0	3	0	2	2	0.471	1.4054	0.012341	0.000575	0.579542
1187	lcl|c231808_g9_i1|m.16644	155	1	0	0	0	1	0	0	0	1	0	1	1	2	0	1	0	1	0	0.021	0.0486	1	0.656368	0.365141
1188	lcl|c231821_g3_i1|m.16651	451	6	4	7	2	5	2	3	2	1	1	5	5	2	2	3	2	4	4	-0.272	-1.0234	0.009171	0.654196	0.000512
1189	lcl|c231859_g5_i5|m.16713	398	1	0	4	1	2	1	3	0	2	0	2	0	2	1	3	1	4	0	-0.716	-1.8722	0	0.587405	0
1190	lcl|c231864_g5_i1|m.16720	313	1	2	2	2	1	1	1	0	1	2	1	0	1	1	2	1	1	0	0.204	0.5536	0.983507	0.278324	0.581038
1191	lcl|c231881_g1_i2|m.16748	469	8	14	10	7	15	5	12	10	12	4	12	12	14	10	9	9	7	5	-0.112	-0.7424	0.101064	0.688972	0.007033
1192	lcl|c231891_g1_i1|m.16759	301	2	2	3	3	0	0	1	1	2	0	1	2	2	3	2	3	2	2	0.213	0.5747	0.971761	0.258288	0.584423
1193	lcl|c231896_g2_i12|m.16763	298	0	3	0	2	2	1	1	4	0	2	1	3	3	3	1	3	2	2	0.661	1.9272	1.6e-05	1e-06	0.5607
1194	lcl|c231904_g1_i7|m.16777	327	5	9	9	7	5	4	5	4	8	6	4	8	10	3	4	3	5	4	0.005	0.0231	1	0.665884	0.34683
1195	lcl|c231907_g1_i1|m.16778	150	0	0	1	0	0	0	0	0	0	0	1	0	0	0	0	0	0	0	0.112	0.2441	1	0.552447	0.483234
1196	lcl|c231929_g5_i1|m.16788	187	0	0	0	8	0	7	0	0	0	9	0	0	0	0	0	6	0	17	1.766	5.4315	0	0	0.516165
1197	lcl|c231929_g5_i4|m.16789	176	2	1	1	4	2	5	2	2	1	5	0	1	1	1	0	1	1	8	0.955	3.0878	0	0	0.532809
1198	lcl|c231931_g2_i1|m.16792	399	19	12	26	16	16	8	20	16	26	9	21	10	22	9	23	9	17	8	-0.508	-4.2163	0	0.529087	0
1199	lcl|c231963_g1_i7|m.16837	608	25	32	26	26	25	35	30	38	39	39	21	30	36	25	22	32	22	20	0.28	3.3757	0	0	0.528672
1200	lcl|c231967_g1_i2|m.16842	529	0	0	4	1	3	1	6	1	4	1	4	1	3	1	5	1	6	1	-1.113	-3.0444	0	0.545781	0
1201	lcl|c231971_g1_i1|m.16848	309	0	0	0	0	0	0	1	0	0	1	0	1	0	1	0	1	0	0	0.09	0.2098	1	0.575024	0.465779
1202	lcl|c231981_g4_i6|m.16864	210	0	1	0	0	0	1	1	1	0	0	1	0	0	1	1	0	0	1	0.103	0.2416	1	0.554158	0.482011
1203	lcl|c231982_g2_i3|m.16868	395	0	0	0	1	0	1	0	0	1	0	0	0	0	1	0	1	0	0	0.017	0.0413	1	0.659176	0.359951
1204	lcl|c231996_g3_i3|m.16899	366	1	3	5	3	6	1	3	2	3	1	3	1	3	0	5	3	3	1	-0.537	-1.8073	0	0.591269	0
1205	lcl|c231997_g2_i3|m.16900	391	2	2	2	2	2	1	4	3	3	2	5	3	5	3	7	5	4	2	-0.245	-0.9409	0.019822	0.663865	0.001181
1206	lcl|c232008_g1_i2|m.16909	654	0	0	0	0	0	0	1	0	0	0	1	0	0	0	0	0	0	0	0.083	0.185	0.999793	0.590136	0.452253
1207	lcl|c232046_g3_i8|m.16952	418	42	41	38	31	47	40	47	22	47	33	61	30	54	42	68	63	58	34	-0.161	-2.346	0	0.564155	0
1208	lcl|c232095_g2_i1|m.16982	129	1	3	5	1	6	0	6	2	3	2	3	2	2	1	3	1	3	2	-0.555	-1.777	0	0.593125	0
1209	lcl|c232105_g3_i1|m.16994	237	2	2	5	4	5	2	5	1	1	0	4	2	1	0	4	3	3	3	-0.288	-1.0249	0.009039	0.654026	0.000504
1210	lcl|c232108_g1_i1|m.16997	226	2	4	5	8	3	5	0	0	3	7	2	3	6	6	1	2	3	6	0.623	2.5777	0	0	0.542947
1211	lcl|c232108_g1_i2|m.16999	226	7	12	15	16	11	13	0	0	12	13	10	11	13	16	3	7	7	10	0.399	2.5074	0	0	0.54447
1212	lcl|c232109_g7_i6|m.17002	210	0	2	1	1	3	1	3	1	3	2	1	2	2	1	1	2	2	1	-0.12	-0.3212	0.749202	0.724745	0.108477
1213	lcl|c232116_g4_i1|m.17013	250	0	0	0	0	1	0	2	0	0	0	0	0	0	0	2	0	0	0	-0.075	-0.1768	0.930008	0.714526	0.197912
1214	lcl|c232133_g1_i5|m.17039	210	4	3	9	3	7	3	5	3	6	0	11	1	7	3	13	1	10	2	-1.073	-4.5189	0	0.525664	0
1215	lcl|c232137_g2_i1|m.17041	159	5	3	4	3	8	4	7	6	7	3	10	2	5	5	11	7	10	3	-0.443	-2.114	0	0.574387	0
1216	lcl|c232181_g4_i2|m.17102	812	1	1	1	0	1	0	2	2	3	1	2	2	3	1	1	2	2	1	-0.158	-0.4253	0.560363	0.722231	0.06315
1217	lcl|c232182_g2_i1|m.17105	131	0	0	0	0	0	1	0	0	0	0	0	0	0	0	0	1	0	1	0.073	0.1757	1	0.595547	0.446987
1218	lcl|c232215_g4_i2|m.17149	101	0	0	0	0	0	0	0	1	0	0	1	0	0	0	1	0	0	0	0.117	0.2502	1	0.548228	0.486186
1219	lcl|c232221_g3_i2|m.17155	495	1	0	1	0	2	0	2	0	0	0	1	0	2	0	2	1	2	1	-0.308	-0.7948	0.068064	0.682224	0.004528
1220	lcl|c232232_g4_i1|m.17169	429	3	5	5	2	5	3	8	2	5	4	10	5	7	3	8	4	8	2	-0.491	-2.1829	0	0.571098	0
1221	lcl|c232241_g6_i1|m.17171	731	0	5	3	10	5	7	8	11	4	6	5	10	2	5	2	9	5	10	0.868	4.3728	0	0	0.520516
1222	lcl|c232241_g6_i3|m.17173	558	0	5	1	3	3	8	2	2	0	2	1	2	0	2	0	2	3	5	0.897	2.9589	0	0	0.535154
1223	lcl|c232242_g3_i1|m.17174	459	8	8	6	10	7	8	14	10	11	7	10	9	8	6	9	12	10	9	0.114	0.7275	0.800239	0.132894	0.599225
1224	lcl|c232249_g2_i1|m.17180	362	22	31	46	41	34	28	33	37	41	31	36	39	36	37	25	28	28	27	0.155	1.9213	1.8e-05	1e-06	0.560905
1225	lcl|c232274_g1_i2|m.17209	416	5	2	4	0	7	0	7	6	6	0	5	2	7	2	6	2	5	1	-0.866	-3.3205	0	0.540551	0
1226	lcl|c232294_g5_i11|m.17226	247	8	4	4	2	2	3	2	4	3	5	0	0	4	2	2	2	2	1	-0.02	-0.0725	0.987016	0.694664	0.275164
1227	lcl|c232318_g1_i1|m.17247	998	0	0	0	0	1	0	0	0	1	1	0	0	1	0	0	0	0	0	0.068	0.1594	1	0.604697	0.437503
1228	lcl|c232338_g2_i2|m.17255	352	0	0	1	1	0	1	0	0	0	1	0	2	0	2	1	2	1	0	0.336	0.8104	0.649348	0.084618	0.601514
1229	lcl|c232350_g3_i1|m.17265	590	2	1	2	2	2	1	2	1	3	0	3	0	3	0	2	0	1	0	-0.524	-1.3161	0.000387	0.625657	1.7e-05
1230	lcl|c232369_g2_i7|m.17306	717	2	1	0	4	2	1	2	1	2	1	1	4	2	1	4	3	2	2	0.137	0.4455	1	0.383476	0.557778
1231	lcl|c232381_g2_i3|m.17311	335	5	2	11	2	8	5	12	7	9	5	16	9	7	6	14	10	8	5	-0.413	-2.2833	0	0.566678	0
1232	lcl|c232401_g7_i2|m.17338	151	4	5	6	4	7	3	7	7	6	4	5	4	4	4	3	3	4	4	-0.032	-0.1526	0.948338	0.710924	0.215268
1233	lcl|c232405_g1_i1|m.17340	437	0	0	0	2	0	1	0	1	0	1	0	0	0	0	0	0	0	0	0.255	0.6022	0.952378	0.232888	0.588303
1234	lcl|c232410_g1_i2|m.17346	164	0	0	2	3	1	2	0	2	0	2	1	4	1	3	0	2	2	1	0.688	1.9428	1.3e-05	0	0.56016
1235	lcl|c232424_g1_i6|m.17358	266	4	4	2	2	3	3	5	5	4	3	4	3	4	4	3	2	4	4	0.059	0.239	1	0.555928	0.480731
1236	lcl|c232440_g3_i1|m.17372	175	1	1	1	0	0	0	3	0	0	0	1	0	0	0	0	0	1	0	-0.104	-0.2488	0.854968	0.721904	0.14984
1237	lcl|c232510_g5_i2|m.17446	569	0	0	0	1	1	0	0	0	0	0	0	0	0	0	0	0	0	0	0.038	0.0945	1	0.637093	0.396676
1238	lcl|c232511_g1_i6|m.17448	419	0	0	0	0	1	0	0	0	0	0	0	0	1	1	0	0	0	0	0.084	0.1943	0.99996	0.584587	0.457414
1239	lcl|c232520_g2_i5|m.17456	567	0	0	0	0	0	0	0	0	0	0	0	1	0	1	0	2	0	0	0.147	0.3415	1	0.477837	0.52498
1240	lcl|c232521_g1_i4|m.17458	344	6	9	10	13	21	17	17	26	11	11	6	16	8	8	4	5	9	7	0.37	2.6505	0	0	0.541402
1241	lcl|c232532_g2_i6|m.17481	512	0	0	0	0	0	0	1	0	0	0	0	0	1	0	3	1	1	0	-0.076	-0.1751	0.931397	0.714292	0.199115
1242	lcl|c232537_g3_i1|m.17484	338	0	3	0	2	5	4	0	1	0	3	4	3	2	2	0	0	0	2	0.343	1.0969	0.1577	0.011125	0.593753
1243	lcl|c232540_g2_i1|m.17495	902	1	1	0	2	1	0	1	0	0	1	0	0	1	1	0	0	2	1	0.086	0.2125	1	0.573317	0.467206
1244	lcl|c232541_g3_i1|m.17498	247	1	1	0	1	0	1	1	2	0	1	0	2	0	1	1	1	0	0	0.255	0.6216	0.93588	0.215576	0.590694
1245	lcl|c232555_g1_i2|m.17516	515	2	3	2	3	0	1	4	3	2	2	1	2	2	2	4	4	1	2	0.251	0.7908	0.687386	0.094685	0.601258
1246	lcl|c232597_g5_i12|m.17580	479	1	0	1	0	0	0	0	1	0	0	0	3	1	3	0	2	0	2	0.556	1.4393	0.008841	0.000396	0.578159
1247	lcl|c232628_g4_i3|m.17621	443	0	0	0	0	1	0	1	0	0	0	0	0	0	0	1	0	0	1	0.064	0.1496	1	0.609997	0.431647
1248	lcl|c232638_g9_i1|m.17634	158	1	2	5	3	3	0	6	1	4	1	3	3	5	3	8	3	5	1	-0.609	-2.1281	0	0.573698	0
1249	lcl|c232653_g3_i1|m.17643	347	2	2	6	4	6	0	5	1	5	0	4	1	4	2	5	0	2	1	-0.783	-2.6593	0	0.554214	0
1250	lcl|c232676_g1_i2|m.17666	263	1	1	1	0	2	1	3	1	2	1	0	1	0	2	0	1	1	2	-0.045	-0.125	0.965199	0.706088	0.235585
1251	lcl|c232684_g7_i2|m.17670	120	1	0	1	0	0	0	0	0	0	0	0	0	0	0	3	0	0	0	-0.102	-0.2438	0.861227	0.721546	0.152975
1252	lcl|c232684_g7_i4|m.17671	523	2	3	7	3	2	2	3	3	5	2	4	2	4	2	4	5	2	3	-0.135	-0.504	0.412033	0.716473	0.039526
1253	lcl|c232696_g3_i2|m.17688	238	0	0	0	0	0	0	0	0	0	0	2	0	0	0	1	0	0	0	-0.017	-0.0388	0.995113	0.68573	0.300738
1254	lcl|c232716_g1_i2|m.17708	496	9	12	15	6	13	13	15	12	9	16	8	9	13	12	11	13	11	15	0.215	1.6269	0.001084	4.2e-05	0.571186
1255	lcl|c232737_g3_i2|m.17725	566	0	0	0	0	1	2	1	0	0	0	0	0	0	0	2	0	0	1	0.048	0.1138	1	0.628114	0.409308
1256	lcl|c232744_g5_i2|m.17733	585	3	7	4	3	8	5	10	5	4	5	14	7	11	2	13	9	17	7	-0.36	-2.0816	0	0.576002	0
1257	lcl|c232758_g3_i3|m.17747	492	0	0	2	0	0	0	1	0	1	0	0	0	1	0	1	1	1	0	-0.017	-0.0375	0.995331	0.685359	0.301721
1258	lcl|c232769_g4_i2|m.17751	967	0	2	1	4	1	2	1	4	1	2	2	2	1	0	0	1	0	1	0.682	1.8568	4.6e-05	2e-06	0.563158
1259	lcl|c232777_g1_i2|m.17758	171	1	0	0	0	1	0	0	0	0	0	0	0	1	1	0	0	0	0	0.044	0.1024	1	0.633483	0.401895
1260	lcl|c232783_g1_i1|m.17764	242	0	1	1	0	3	1	2	0	1	0	4	3	1	2	2	2	3	0	-0.167	-0.4901	0.437543	0.717677	0.043095
1261	lcl|c232791_g2_i3|m.17780	1114	5	7	26	28	13	9	29	17	11	13	17	13	8	5	25	9	22	11	-0.173	-1.3957	0.000142	0.619297	6e-06
1262	lcl|c232804_g4_i5|m.17788	301	1	0	2	1	2	0	2	2	3	1	4	0	1	0	2	1	1	0	-0.4	-1.1083	0.003938	0.644973	0.000204
1263	lcl|c232813_g1_i6|m.17800	145	0	0	1	1	0	1	3	2	2	1	5	4	1	2	1	2	3	4	0.162	0.5116	0.998899	0.319112	0.573192
1264	lcl|c232813_g3_i2|m.17801	479	0	1	1	5	0	0	0	0	0	0	0	0	0	0	2	1	1	2	0.378	0.9887	0.305728	0.026013	0.598346
1265	lcl|c232821_g1_i1|m.17807	713	0	0	0	0	0	0	1	1	0	0	0	3	0	1	0	1	0	2	0.263	0.7168	0.817137	0.140217	0.598676
1266	lcl|c232834_g2_i9|m.17824	151	14	13	19	11	22	11	24	19	20	11	15	11	24	13	21	15	18	11	-0.254	-2.1153	0	0.574323	0
1267	lcl|c232842_g1_i1|m.17827	221	2	4	3	7	5	2	3	6	4	4	1	2	0	1	4	4	2	3	0.41	1.5904	0.001692	6.6e-05	0.572478
1268	lcl|c232843_g1_i4|m.17830	270	8	7	21	13	14	5	19	10	7	3	13	8	15	15	13	11	21	20	-0.179	-1.4135	0.000113	0.617934	5e-06
1269	lcl|c232847_g2_i2|m.17831	205	2	0	3	2	4	0	2	4	2	0	2	3	2	4	3	4	3	3	0.158	0.562	0.979171	0.270299	0.582429
1270	lcl|c232847_g6_i1|m.17834	305	1	3	2	2	1	3	1	1	1	4	1	5	2	4	1	5	3	4	0.984	3.0797	0	0	0.532949
1271	lcl|c232850_g3_i3|m.17837	316	0	0	0	0	1	0	2	0	1	0	0	0	0	0	2	0	0	0	-0.088	-0.2076	0.901764	0.718277	0.176618
1272	lcl|c232853_g2_i4|m.17839	478	0	0	1	3	2	1	0	1	1	2	1	1	0	4	0	1	1	0	0.487	1.2993	0.032635	0.001744	0.584172
1273	lcl|c232868_g2_i13|m.17849	171	0	0	0	0	0	0	0	1	0	0	0	1	0	0	1	1	1	2	0.185	0.4348	1	0.393697	0.554911
1274	lcl|c232893_g3_i2|m.17884	184	0	0	1	1	2	0	0	0	1	0	1	0	0	0	1	0	0	0	0.027	0.0634	1	0.650463	0.375523
1275	lcl|c232899_g1_i2|m.17887	378	1	1	2	2	0	3	1	1	0	1	2	3	1	2	1	1	0	2	0.46	1.2961	0.033555	0.001801	0.584319
1276	lcl|c232931_g1_i10|m.17922	718	0	0	0	0	1	0	1	0	0	1	1	0	0	1	0	0	0	0	0.096	0.2252	1	0.565128	0.473797
1277	lcl|c232943_g2_i1|m.17930	604	0	0	0	0	0	1	0	0	1	0	0	0	0	0	0	0	0	0	0.067	0.1556	1	0.606769	0.435245
1278	lcl|c232949_g3_i7|m.17939	154	1	1	4	2	2	1	6	1	4	2	6	4	5	3	6	4	6	1	-0.562	-2.2078	0	0.569959	0
1279	lcl|c232964_g4_i5|m.17974	410	1	0	1	3	0	0	0	0	1	0	1	0	0	0	0	0	1	0	0.235	0.5851	0.964983	0.248576	0.58596
1280	lcl|c232983_g2_i2|m.17991	490	0	0	2	1	2	1	4	2	0	2	0	1	3	0	0	2	2	1	-0.234	-0.6296	0.214075	0.70309	0.016851
1281	lcl|c232986_g1_i4|m.17993	2567	0	0	0	0	0	0	1	0	1	0	0	1	0	0	0	2	0	2	0.243	0.5885	0.962631	0.245428	0.586444
1282	lcl|c233001_g2_i4|m.18006	309	5	8	10	8	5	4	13	7	3	4	6	4	6	9	6	6	11	7	0.019	0.1039	1	0.632787	0.402878
1283	lcl|c233011_g1_i2|m.18023	248	5	6	0	0	8	11	18	26	7	5	0	0	7	1	0	0	2	5	0.299	1.6002	0.001504	5.9e-05	0.572129
1284	lcl|c233012_g3_i3|m.18031	551	6	3	8	4	4	1	10	1	5	2	12	4	6	2	10	3	3	0	-0.961	-3.8318	0	0.53356	0
1285	lcl|c233024_g1_i6|m.18051	1029	4	6	11	11	12	5	9	8	12	6	11	7	13	6	13	6	9	6	-0.261	-1.568	1.3e-05	0.606785	0
1286	lcl|c233026_g1_i2|m.18055	412	0	0	1	1	3	2	4	0	4	0	6	4	4	2	4	2	4	2	-0.467	-1.5147	2.8e-05	0.610512	1e-06
1287	lcl|c233030_g2_i3|m.18059	1298	3	3	6	2	3	1	9	4	2	1	4	3	3	1	8	1	6	5	-0.587	-2.2635	0	0.567513	0
1288	lcl|c233033_g3_i4|m.18064	370	0	0	3	1	1	0	2	2	0	0	0	1	0	1	0	0	3	0	-0.217	-0.5232	0.377631	0.714698	0.034985
1289	lcl|c233042_g5_i1|m.18070	272	2	2	2	3	2	2	3	3	1	2	1	4	2	4	1	4	5	3	0.502	1.7038	0.000401	1.5e-05	0.568501
1290	lcl|c233048_g1_i8|m.18077	496	1	0	3	1	1	1	3	0	2	0	2	0	2	0	3	1	2	1	-0.562	-1.439	8e-05	0.616014	3e-06
1291	lcl|c233061_g7_i1|m.18094	111	0	0	0	0	1	0	2	1	0	0	0	0	0	0	0	1	0	0	0.003	0.0069	1	0.671515	0.334957
1292	lcl|c233068_g2_i1|m.18098	672	2	5	6	8	4	4	3	17	3	8	3	12	7	14	0	4	6	7	0.966	4.8508	0	0	0.518183
1293	lcl|c233068_g2_i3|m.18101	639	3	5	5	7	4	4	3	17	3	8	3	13	7	14	0	4	6	7	0.973	5.2103	0	0	0.516901
1294	lcl|c233068_g3_i2|m.18104	479	4	2	10	10	0	0	2	4	6	3	3	1	5	6	1	2	2	2	0.043	0.1717	0.999919	0.597831	0.444689
1295	lcl|c233092_g2_i1|m.18134	203	0	1	0	0	0	1	0	1	0	1	0	1	0	1	1	1	0	0	0.141	0.3161	1	0.498745	0.51518
1296	lcl|c233103_g2_i1|m.18143	198	0	0	0	0	0	0	1	0	1	0	1	0	1	0	1	0	0	0	0.083	0.1879	0.999925	0.588422	0.453874
1297	lcl|c233130_g1_i1|m.18171	548	0	0	2	1	2	0	1	1	0	2	2	0	3	1	1	2	3	2	-0.115	-0.3185	0.753645	0.724714	0.109878
1298	lcl|c233138_g2_i2|m.18184	151	0	0	0	0	0	0	0	1	0	0	0	0	0	0	0	0	0	1	0.081	0.1848	0.999781	0.590254	0.452141
1299	lcl|c233142_g2_i1|m.18198	785	0	0	0	0	0	0	2	0	1	0	0	0	0	0	0	0	2	0	-0.074	-0.18	0.927368	0.714958	0.195655
1300	lcl|c233143_g2_i13|m.18204	852	3	4	3	2	2	0	1	1	4	3	0	0	2	2	0	0	0	0	-0.02	-0.065	0.989129	0.692786	0.28086
1301	lcl|c233156_g1_i1|m.18213	558	13	21	13	14	19	18	21	20	17	15	17	20	21	20	24	21	25	17	0.148	1.4145	0.011298	0.000521	0.579166
1302	lcl|c233163_g6_i1|m.18223	1116	1	0	0	1	0	0	0	0	0	0	0	0	0	0	0	0	0	0	0.034	0.0799	1	0.643535	0.386863
1303	lcl|c233166_g6_i1|m.18229	1069	0	0	0	1	0	0	0	0	0	0	0	0	1	0	0	0	1	0	0.078	0.1731	0.999963	0.597034	0.445496
1304	lcl|c233181_g4_i3|m.18256	279	1	1	4	2	2	1	3	0	3	1	4	1	1	2	2	2	5	2	-0.458	-1.2962	0.000492	0.627325	2.2e-05
1305	lcl|c233212_g2_i6|m.18275	344	0	1	1	0	0	0	1	1	1	0	0	0	0	0	0	0	0	0	0.082	0.186	0.999846	0.589547	0.452813
1306	lcl|c233215_g1_i5|m.18281	355	1	0	1	1	1	1	1	2	1	1	1	1	0	1	1	1	1	1	0.168	0.3743	1	0.449459	0.536555
1307	lcl|c233217_g3_i1|m.18285	585	0	0	2	0	0	0	1	1	1	1	1	0	0	0	0	1	1	0	-0.055	-0.1268	0.964212	0.706428	0.234246
1308	lcl|c233235_g3_i2|m.18302	393	0	0	0	0	1	0	0	0	0	0	1	0	0	0	0	0	0	0	0.102	0.2467	1	0.550657	0.484498
1309	lcl|c233247_g1_i1|m.18311	591	21	24	37	27	44	23	33	21	35	24	32	18	35	28	45	27	35	23	-0.217	-2.4252	0	0.561235	0
1310	lcl|c233257_g5_i1|m.18320	206	2	1	2	1	2	2	2	3	4	3	2	2	3	1	3	3	2	1	-0.081	-0.2642	0.834884	0.722871	0.140402
1311	lcl|c233260_g1_i1|m.18321	133	1	2	8	4	4	2	5	2	1	2	1	2	1	1	3	2	3	3	-0.127	-0.4176	0.575142	0.72264	0.065932
1312	lcl|c233287_g2_i1|m.18368	844	14	8	19	19	29	10	19	13	18	5	18	6	20	6	22	3	20	6	-0.689	-5.054	0	0.519988	0
1313	lcl|c233306_g1_i2|m.18390	556	45	57	64	52	70	57	68	61	60	40	70	64	53	55	61	69	74	50	0.055	0.9012	0.466942	0.048055	0.600911
1314	lcl|c233334_g2_i12|m.18425	420	1	1	3	1	1	1	0	0	0	0	4	0	1	1	0	0	2	0	-0.317	-0.7951	0.067905	0.682186	0.004516
1315	lcl|c233334_g2_i17|m.18426	356	1	1	4	1	1	0	0	0	0	0	4	0	1	1	0	0	2	0	-0.432	-1.0906	0.004718	0.646831	0.000249
1316	lcl|c233339_g2_i12|m.18429	982	1	0	1	2	1	1	0	0	0	0	1	0	1	0	2	0	1	1	0.072	0.168	0.999898	0.59992	0.442547
1317	lcl|c233342_g3_i1|m.18435	155	0	0	0	0	0	0	0	1	1	0	0	0	0	0	0	0	0	0	0.12	0.2638	1	0.538598	0.492602
1318	lcl|c233342_g3_i6|m.18439	180	0	0	0	0	0	0	0	1	1	0	0	0	0	0	0	0	0	0	0.082	0.1916	0.999988	0.586213	0.455927
1319	lcl|c233348_g2_i1|m.18445	155	0	0	0	0	0	1	0	1	0	0	0	0	0	0	0	0	0	1	0.096	0.2138	1	0.572491	0.467889
1320	lcl|c233370_g1_i2|m.18468	311	2	8	5	7	5	3	6	8	4	12	3	7	3	13	7	11	6	7	0.774	3.821	0	0	0.524207
1321	lcl|c233377_g4_i3|m.18471	178	1	3	1	2	2	1	2	5	3	3	1	1	1	1	2	1	3	1	0.197	0.6111	0.94515	0.224877	0.589435
1322	lcl|c233384_g5_i1|m.18475	423	4	3	0	6	2	1	1	3	1	1	2	3	4	3	3	4	4	1	0.234	0.7867	0.695295	0.096895	0.601184
1323	lcl|c233384_g5_i6|m.18482	422	1	0	0	0	0	0	1	0	0	0	2	2	0	0	0	0	0	0	0.109	0.2533	1	0.54606	0.487668
1324	lcl|c233414_g6_i1|m.18518	131	0	0	1	0	0	1	0	1	0	0	0	0	0	0	0	0	0	0	0.081	0.1878	0.999922	0.588481	0.453818
1325	lcl|c233425_g3_i4|m.18529	173	0	1	2	0	0	0	2	1	2	0	1	1	1	0	5	1	1	0	-0.379	-0.9519	0.017938	0.662539	0.00106
1326	lcl|c233431_g1_i6|m.18546	197	0	0	0	1	1	1	0	2	0	1	0	3	1	1	1	1	1	2	0.414	1.0728	0.185031	0.013557	0.594855
1327	lcl|c233449_g1_i1|m.18576	395	3	0	3	1	2	0	1	0	2	1	2	0	2	0	1	0	1	0	-0.485	-1.2741	0.000639	0.629217	2.9e-05
1328	lcl|c233474_g3_i1|m.18592	403	0	0	0	1	0	0	1	0	0	0	0	0	0	0	0	0	0	0	0.06	0.1343	1	0.617977	0.42228
1329	lcl|c233495_g1_i1|m.18614	257	2	5	2	3	0	0	0	0	6	5	0	2	8	6	0	0	0	0	0.212	0.7384	0.782209	0.12569	0.599718
1330	lcl|c233502_g5_i1|m.18630	660	0	0	0	0	0	1	0	0	0	1	0	0	0	0	0	0	1	0	0.101	0.2293	1	0.562428	0.475881
1331	lcl|c233547_g3_i1|m.18698	103	0	0	0	0	0	0	1	1	0	1	0	2	2	1	1	0	1	1	0.144	0.345	1	0.47488	0.526272
1332	lcl|c233547_g4_i3|m.18699	305	3	4	5	2	7	2	4	3	5	4	7	5	7	2	9	9	10	7	-0.249	-1.1358	0.00296	0.642156	0.00015
1333	lcl|c233552_g1_i1|m.18704	538	1	2	5	4	0	0	1	5	4	3	1	5	3	8	1	2	1	3	0.742	2.6188	0	0	0.542072
1334	lcl|c233557_g1_i1|m.18714	490	1	1	4	2	1	1	1	2	2	2	1	1	2	1	2	2	2	1	-0.087	-0.2477	0.856349	0.721827	0.150527
1335	lcl|c233581_g5_i1|m.18734	105	1	0	0	1	0	0	1	0	0	1	0	1	0	0	1	0	1	0	0.132	0.2742	1	0.531028	0.497354
1336	lcl|c233582_g4_i5|m.18735	330	0	0	1	0	0	0	0	0	0	0	0	0	0	1	1	0	0	1	0.071	0.1634	1	0.60249	0.43986
1337	lcl|c233583_g1_i1|m.18736	292	4	4	2	5	4	3	6	6	6	2	2	1	4	1	5	3	6	2	-0.214	-0.8607	0.039898	0.673803	0.002522
1338	lcl|c233583_g1_i3|m.18737	289	7	11	3	6	9	9	16	11	16	9	3	2	9	5	13	11	14	9	-0.038	-0.2299	0.877723	0.720433	0.16186
1339	lcl|c233588_g6_i3|m.18739	184	3	2	3	2	2	2	3	4	4	0	2	0	3	3	3	1	2	1	-0.224	-0.7199	0.118728	0.691856	0.008441
1340	lcl|c233596_g1_i1|m.18749	391	2	1	3	3	1	1	6	2	5	3	4	2	4	3	5	5	4	2	-0.258	-0.9535	0.017678	0.662347	0.001043
1341	lcl|c233647_g1_i1|m.18818	1166	1	1	1	1	2	1	1	1	1	1	0	0	1	0	2	1	1	0	-0.108	-0.2567	0.844914	0.722426	0.144958
1342	lcl|c233650_g1_i7|m.18822	194	2	1	2	1	2	0	1	1	0	1	1	1	0	1	1	1	0	0	-0.183	-0.4527	0.507952	0.720537	0.053956
1343	lcl|c233661_g2_i3|m.18841	210	0	0	0	0	18	17	24	30	0	0	2	2	0	0	21	16	17	19	0.197	1.3446	0.021816	0.001099	0.582141
1344	lcl|c233679_g3_i13|m.18855	228	1	1	3	1	1	0	2	1	2	1	3	1	2	2	5	2	5	2	-0.48	-1.3752	0.000185	0.620891	8e-06
1345	lcl|c233739_g1_i1|m.18926	229	1	0	3	0	1	0	1	0	2	0	1	0	0	0	0	0	1	0	-0.135	-0.3102	0.767049	0.724583	0.114255
1346	lcl|c233739_g3_i1|m.18931	617	16	0	25	0	20	0	6	0	19	0	13	0	16	0	16	1	14	0	-2.436	-8.2045	0	0.512381	0
1347	lcl|c233766_g4_i1|m.18988	173	51	39	63	38	19	20	37	33	37	39	42	47	52	44	92	113	91	73	0.075	1.1421	0.114824	0.007577	0.591622
1348	lcl|c233767_g1_i3|m.18989	165	40	33	50	32	41	25	62	44	45	23	63	31	54	32	47	29	46	26	-0.334	-4.0955	0	0.530429	0
1349	lcl|c233784_g1_i2|m.19012	502	0	1	0	1	0	0	0	0	0	0	0	0	2	0	0	0	0	1	-0.015	-0.0327	0.996184	0.683974	0.305349
1350	lcl|c233811_g4_i2|m.19026	746	1	1	1	1	1	3	1	2	1	0	0	0	0	0	1	2	1	2	0.478	1.2715	0.041421	0.002296	0.585455
1351	lcl|c233818_g2_i6|m.19032	101	4	1	10	0	14	1	10	1	2	1	8	1	7	2	13	3	14	2	-1.576	-5.8352	0	0.51664	0
1352	lcl|c233837_g1_i4|m.19057	508	0	0	2	0	0	0	0	1	0	0	0	0	0	0	0	0	0	0	-0.032	-0.0744	0.986433	0.69513	0.273721
1353	lcl|c233840_g3_i1|m.19060	338	0	1	1	2	2	1	1	1	2	1	1	0	1	0	2	1	1	0	-0.021	-0.0534	0.992083	0.689758	0.289671
1354	lcl|c233847_g4_i2|m.19066	221	0	0	1	0	1	0	0	0	1	0	0	0	0	0	0	0	0	0	0.129	0.297	1	0.513811	0.507315
1355	lcl|c233848_g8_i1|m.19070	239	0	0	0	0	0	0	2	0	0	0	1	0	0	0	1	0	0	0	-0.003	-0.0064	0.999529	0.675906	0.325091
1356	lcl|c233873_g4_i1|m.19119	583	2	0	4	3	7	2	4	3	1	1	4	4	1	3	8	3	9	4	-0.336	-1.2641	0.000718	0.630088	3.2e-05
1357	lcl|c233905_g2_i1|m.19151	172	7	3	7	1	21	4	14	6	12	3	17	5	18	3	15	7	22	5	-1.079	-5.7268	0	0.517136	0
1358	lcl|c233922_g1_i2|m.19174	1172	4	0	4	2	4	1	3	0	2	2	2	2	3	1	5	2	3	3	-0.515	-1.6941	2e-06	0.598367	0
1359	lcl|c233948_g1_i2|m.19238	365	7	9	10	5	12	6	15	10	6	7	12	13	10	8	11	9	10	8	-0.059	-0.3946	0.618654	0.723666	0.074772
1360	lcl|c233953_g2_i3|m.19243	141	0	0	1	1	0	0	1	0	0	0	0	0	0	0	0	0	0	0	0.105	0.2296	1	0.562229	0.476033
1361	lcl|c233954_g6_i2|m.19250	270	1	0	1	1	3	0	1	0	2	0	3	0	3	1	4	1	3	2	-0.569	-1.6713	3e-06	0.59985	0
1362	lcl|c233968_g2_i12|m.19271	200	4	0	3	0	3	0	0	0	3	0	4	0	4	2	0	0	2	1	-0.68	-1.9911	0	0.580729	0
1363	lcl|c233968_g6_i1|m.19272	118	3	2	0	0	6	0	1	0	3	0	1	0	2	0	0	0	4	0	-0.584	-1.618	6e-06	0.603383	0
1364	lcl|c234004_g4_i3|m.19315	477	2	0	2	0	0	0	3	1	3	0	1	0	1	0	1	0	1	0	-0.37	-0.9994	0.011535	0.656941	0.000657
1365	lcl|c234041_g5_i1|m.19364	124	8	8	6	9	7	8	6	5	5	8	6	8	2	9	7	8	6	6	0.42	2.2185	0	0	0.551477
1366	lcl|c234054_g3_i2|m.19385	336	67	74	74	68	81	55	71	63	83	54	100	74	83	51	101	74	99	76	-0.084	-1.4364	8.3e-05	0.616208	3e-06
1367	lcl|c234060_g2_i2|m.19387	328	2	3	6	5	2	2	3	2	4	2	4	2	5	4	5	2	4	3	-0.168	-0.6571	0.180699	0.699752	0.013746
1368	lcl|c234075_g1_i1|m.19400	239	1	2	5	4	6	0	3	1	1	0	5	0	2	0	6	0	4	0	-0.747	-2.434	0	0.560929	0
1369	lcl|c234077_g1_i1|m.19404	690	0	0	4	0	1	0	0	0	0	0	0	0	0	0	0	0	0	0	-0.176	-0.4146	0.580845	0.72279	0.06704
1370	lcl|c234080_g1_i1|m.19410	449	1	2	2	1	3	1	6	0	2	1	1	1	2	0	1	1	4	1	-0.583	-1.6714	3e-06	0.599843	0
1371	lcl|c234082_g2_i6|m.19416	452	0	2	0	1	0	0	0	0	1	0	0	0	0	0	0	0	0	0	0.145	0.3478	1	0.472503	0.527296
1372	lcl|c234108_g1_i2|m.19454	303	1	1	4	3	2	1	6	1	1	0	1	0	0	1	0	1	1	1	-0.353	-0.932	0.021476	0.664945	0.001288
1373	lcl|c234114_g3_i3|m.19475	628	1	1	2	2	0	1	1	1	0	0	0	0	0	0	1	1	0	1	0.108	0.2466	1	0.550726	0.484449
1374	lcl|c234120_g6_i1|m.19489	165	8	4	11	6	9	7	10	5	4	5	3	4	2	0	4	4	6	3	-0.231	-1.1091	0.003906	0.64489	0.000203
1375	lcl|c234134_g6_i1|m.19522	261	0	0	0	0	1	0	1	0	0	0	0	0	0	0	0	0	0	0	0.076	0.1734	0.99997	0.596863	0.445668
1376	lcl|c234135_g3_i2|m.19525	483	1	0	0	0	0	1	0	0	0	0	0	0	0	0	0	0	0	1	0.077	0.1685	0.999865	0.599639	0.442837
1377	lcl|c234140_g5_i2|m.19531	617	2	4	1	3	1	1	2	0	1	0	1	1	2	2	1	0	2	0	0.212	0.5842	0.965606	0.249411	0.58583
1378	lcl|c234163_g1_i1|m.19560	428	0	0	0	0	0	0	0	0	0	0	0	0	1	0	0	0	1	1	0.069	0.1619	1	0.60332	0.438979
1379	lcl|c234177_g2_i1|m.19581	206	1	1	1	0	0	0	1	0	1	0	1	0	1	0	3	1	0	0	-0.114	-0.2695	0.827753	0.723157	0.137231
1380	lcl|c234209_g3_i1|m.19613	100	0	0	0	0	1	0	1	0	1	2	0	1	0	0	0	0	1	1	0.195	0.4717	1	0.358143	0.564347
1381	lcl|c234222_g6_i3|m.19630	584	1	2	2	1	1	0	1	0	1	0	2	1	0	1	1	1	0	0	-0.04	-0.0966	0.978531	0.700278	0.256899
1382	lcl|c234277_g5_i1|m.19677	435	6	2	1	1	10	2	6	2	8	0	2	1	1	0	3	1	2	0	-0.982	-3.0693	0	0.54528	0
1383	lcl|c234322_g7_i1|m.19718	538	0	1	0	3	1	1	2	2	1	1	1	2	1	3	1	1	0	1	0.487	1.235	0.05608	0.003262	0.587172
1384	lcl|c234352_g2_i1|m.19757	349	1	0	1	1	0	0	0	0	0	0	2	1	0	0	0	1	2	0	-0.104	-0.2499	0.853586	0.72198	0.149155
1385	lcl|c234380_g5_i3|m.19780	403	0	0	0	0	0	1	0	1	0	0	0	0	0	2	0	2	0	1	0.249	0.5814	0.967545	0.252017	0.585423
1386	lcl|c234391_g1_i4|m.19790	185	0	0	1	1	1	2	0	2	1	0	0	1	0	1	0	0	0	0	0.307	0.706	0.833621	0.147858	0.598057
1387	lcl|c234420_g1_i5|m.19816	618	0	0	0	2	0	0	0	0	0	0	0	0	0	1	0	0	0	0	0.177	0.4219	1	0.405898	0.551308
1388	lcl|c234421_g4_i7|m.19822	540	5	2	3	0	6	2	4	5	9	3	8	5	13	8	19	5	11	8	-0.515	-2.7483	0	0.552053	0
1389	lcl|c234442_g1_i3|m.19849	596	0	1	4	4	1	1	1	1	2	2	2	1	1	1	1	0	1	0	0.046	0.1189	1	0.62565	0.412579
1390	lcl|c234446_g3_i2|m.19850	138	4	3	7	2	8	2	3	0	5	1	9	1	7	0	8	1	7	0	-1.273	-4.3732	0	0.527362	0
1391	lcl|c234480_g1_i1|m.19869	1123	0	1	1	1	0	1	1	1	2	1	0	1	0	0	2	0	0	0	-0.111	-0.258	0.843181	0.722507	0.144162
1392	lcl|c234511_g2_i1|m.19914	150	1	1	1	2	2	0	2	3	2	1	2	1	2	2	2	3	2	2	0.126	0.3919	1	0.433651	0.542285
1393	lcl|c234533_g4_i3|m.19947	238	32	29	50	35	41	28	38	31	36	27	53	41	44	25	47	34	40	29	-0.141	-1.7672	1e-06	0.593732	0
1394	lcl|c234544_g3_i6|m.19962	411	6	1	10	2	11	2	10	2	5	2	8	2	6	2	6	1	11	3	-1.241	-4.6807	0	0.523671	0
1395	lcl|c234579_g2_i6|m.20008	462	2	2	5	3	5	1	5	1	5	2	5	2	7	3	10	2	7	3	-0.787	-3.0043	0	0.546594	0
1396	lcl|c234617_g3_i1|m.20034	395	0	0	1	0	0	0	0	0	0	0	0	0	0	1	0	0	2	0	-0.012	-0.0286	0.996868	0.68277	0.308443
1397	lcl|c234620_g1_i3|m.20041	1301	1	0	0	3	0	0	0	2	0	0	1	0	1	1	0	1	0	0	0.345	0.852	0.565895	0.065894	0.601568
1398	lcl|c234626_g4_i3|m.20042	463	32	19	31	18	37	19	45	24	26	19	32	23	27	22	43	24	28	24	-0.289	-3.1957	0	0.542804	0
1399	lcl|c234626_g5_i4|m.20044	154	0	1	0	1	0	0	0	1	0	0	0	0	0	1	2	0	0	1	-0.006	-0.0153	0.998678	0.678728	0.318441
1400	lcl|c234643_g1_i12|m.20068	232	10	12	6	11	14	14	10	13	11	16	8	15	12	13	16	19	14	15	0.404	3.0899	0	0	0.532773
1401	lcl|c234643_g1_i2|m.20073	218	11	22	9	20	10	24	14	18	10	24	11	41	18	38	16	38	21	25	0.89	8.4085	0	0	0.512633
1402	lcl|c234643_g1_i6|m.20078	228	3	2	4	6	3	2	4	3	3	3	3	4	3	4	4	3	7	7	0.135	0.5593	0.980567	0.272872	0.581988
1403	lcl|c234643_g1_i7|m.20081	227	4	7	10	14	7	9	13	8	6	10	5	20	10	14	7	13	11	13	0.561	3.6859	0	0	0.52545
1404	lcl|c234655_g3_i2|m.20090	332	1	1	0	0	1	1	2	1	1	1	0	1	1	0	3	1	2	0	-0.221	-0.5639	0.309142	0.710566	0.026744
1405	lcl|c234657_g3_i4|m.20097	120	1	1	1	0	1	1	1	1	1	1	2	2	1	3	1	3	2	2	0.389	1.0025	0.283292	0.023471	0.597824
1406	lcl|c234687_g2_i2|m.20139	137	0	0	1	0	0	0	1	0	1	0	1	0	0	0	0	0	0	0	0.086	0.1961	0.999906	0.583496	0.458401
1407	lcl|c234687_g3_i2|m.20140	139	0	0	0	0	0	0	0	1	0	0	0	0	1	0	1	0	0	0	0.113	0.2742	1	0.531028	0.497354
1408	lcl|c234705_g1_i1|m.20159	349	0	0	0	0	0	0	0	0	0	0	1	1	0	0	0	1	0	0	0.057	0.135	1	0.617619	0.422714
1409	lcl|c234712_g2_i1|m.20167	759	2	0	1	0	2	0	0	0	1	1	2	1	1	1	1	0	1	0	-0.204	-0.5041	0.411853	0.716464	0.039501
1410	lcl|c234733_g4_i1|m.20188	177	0	4	2	3	3	1	3	2	0	1	2	7	2	3	0	0	0	0	0.463	1.4899	0.005248	0.000222	0.576178
1411	lcl|c234733_g4_i3|m.20189	178	0	1	0	0	1	1	0	0	0	0	1	4	1	0	0	0	0	0	0.355	0.8548	0.560271	0.064759	0.60155
1412	lcl|c234738_g1_i1|m.20193	257	3	4	3	5	3	2	3	4	3	4	3	5	3	6	3	3	3	2	0.409	1.6034	0.001447	5.6e-05	0.572016
1413	lcl|c234738_g1_i3|m.20194	257	10	9	10	4	11	5	18	12	20	14	16	12	18	14	11	8	12	6	-0.233	-1.6619	3e-06	0.600466	0
1414	lcl|c234783_g2_i5|m.20249	165	7	0	3	0	6	0	13	0	2	0	19	0	7	0	15	0	9	0	-1.911	-6.1786	0	0.515047	0
1415	lcl|c234788_g2_i3|m.20258	307	1	1	3	1	4	3	7	5	3	2	6	5	6	5	7	5	4	6	-0.036	-0.1493	0.950541	0.710387	0.217671
1416	lcl|c234789_g3_i1|m.20259	783	2	1	12	6	5	0	11	5	6	2	6	2	3	2	9	4	6	2	-0.691	-2.7227	0	0.552653	0
1417	lcl|c234838_g1_i12|m.20324	840	0	0	0	0	1	1	0	0	0	0	0	0	0	0	0	0	0	0	0.047	0.1134	1	0.628305	0.40905
1418	lcl|c234851_g1_i2|m.20336	428	2	3	3	2	3	3	5	5	2	1	1	3	1	0	2	3	3	2	0.169	0.5695	0.974889	0.263187	0.583622
1419	lcl|c234864_g8_i3|m.20357	101	1	1	0	0	0	0	0	0	0	0	0	0	0	0	0	0	2	1	0.008	0.0185	1	0.667515	0.343477
1420	lcl|c234867_g1_i1|m.20362	1625	0	1	2	1	1	0	1	1	2	0	1	1	1	1	0	0	0	1	-0.105	-0.2498	0.853712	0.721973	0.149218
1421	lcl|c234869_g3_i5|m.20367	753	4	0	5	1	3	3	2	2	1	2	3	0	2	1	2	0	2	1	-0.443	-1.2965	0.00049	0.627299	2.2e-05
1422	lcl|c234874_g6_i2|m.20370	742	0	0	0	0	0	1	0	1	0	0	1	0	0	0	1	0	0	0	0.053	0.126	1	0.622156	0.417084
1423	lcl|c234891_g1_i3|m.20389	296	1	0	3	0	4	0	2	1	1	1	1	0	3	1	3	0	3	0	-0.653	-1.6688	3e-06	0.600014	0
1424	lcl|c234898_g1_i3|m.20394	504	2	5	4	7	6	6	4	9	2	4	2	6	1	4	0	5	2	10	0.962	3.9516	0	0	0.523131
1425	lcl|c234903_g3_i2|m.20397	465	0	0	0	1	0	0	0	0	1	1	0	0	0	1	0	0	0	0	0.102	0.2353	1	0.558426	0.478895
1426	lcl|c234912_g2_i1|m.20410	478	0	1	3	1	0	1	0	0	0	1	0	0	0	0	0	3	0	0	0.055	0.1377	1	0.616234	0.424384
1427	lcl|c234934_g3_i3|m.20432	882	68	59	94	65	90	69	90	78	87	59	86	58	88	49	83	57	84	53	-0.181	-3.1778	0	0.543146	0
1428	lcl|c234955_g3_i3|m.20445	340	23	1	34	1	16	0	23	0	27	1	27	1	26	1	30	2	22	0	-2.806	-10.0135	0	0.511022	0
1429	lcl|c235036_g1_i1|m.20514	319	9	14	19	17	12	13	19	14	10	11	12	9	17	13	11	12	17	15	0.111	0.8899	0.48939	0.051766	0.601122
1430	lcl|c235052_g1_i4|m.20524	324	1	1	0	0	0	0	1	1	0	1	0	0	1	0	1	2	1	2	0.289	0.6864	0.861647	0.162351	0.596758
1431	lcl|c235079_g5_i3|m.20543	326	1	1	0	1	0	1	1	1	0	1	1	4	2	2	1	2	0	2	0.454	1.2258	0.06042	0.003557	0.58761
1432	lcl|c235089_g1_i3|m.20552	1227	7	8	8	6	6	4	11	9	3	2	6	7	5	2	7	8	7	5	-0.024	-0.1305	0.96214	0.707115	0.2315
1433	lcl|c235095_g3_i4|m.20556	353	0	0	0	0	2	0	0	0	0	0	0	0	0	0	3	0	0	0	-0.198	-0.4856	0.445846	0.718051	0.044303
1434	lcl|c235107_g1_i3|m.20571	507	0	0	0	0	0	0	0	1	0	1	0	0	0	0	0	0	0	0	0.1	0.2245	1	0.565587	0.473439
1435	lcl|c235115_g6_i1|m.20588	219	4	2	3	3	2	2	2	3	1	3	1	2	1	2	2	1	0	1	0.202	0.6714	0.881377	0.173972	0.595603
1436	lcl|c235126_g4_i1|m.20601	207	6	19	24	30	12	10	16	22	15	21	24	19	12	23	1	6	11	19	0.515	4.5377	0	0	0.519627
1437	lcl|c235170_g2_i4|m.20659	151	0	1	0	0	0	0	0	1	0	1	0	0	0	0	0	0	0	0	0.099	0.2161	1	0.571024	0.469094
1438	lcl|c235184_g7_i1|m.20675	237	1	2	5	4	9	4	6	4	3	3	7	7	6	4	8	5	10	4	-0.245	-1.1613	0.002259	0.639618	0.000112
1439	lcl|c235213_g4_i11|m.20710	332	1	1	6	7	1	2	2	1	1	0	4	6	3	4	1	1	5	3	0.216	0.7813	0.705476	0.099862	0.601075
1440	lcl|c235237_g2_i1|m.20732	158	0	0	0	0	0	0	0	0	0	0	1	0	1	0	0	0	0	1	0.095	0.2157	1	0.571279	0.468885
1441	lcl|c235239_g6_i4|m.20736	325	1	2	5	6	3	3	5	4	3	1	2	2	1	0	2	1	4	4	0.092	0.3199	1	0.49568	0.516694
1442	lcl|c235240_g3_i2|m.20738	383	1	1	0	1	1	0	0	0	0	0	0	0	0	1	0	1	1	1	0.09	0.197	0.999868	0.582949	0.458892
1443	lcl|c235253_g1_i1|m.20757	476	6	6	1	5	6	10	13	6	6	5	1	3	3	6	7	14	7	8	0.39	2.1148	1e-06	0	0.554502
1444	lcl|c235267_g2_i2|m.20774	223	0	0	0	0	0	0	2	0	0	0	0	0	0	0	0	0	0	0	-0.015	-0.035	0.995754	0.684641	0.303611
1445	lcl|c235276_g3_i3|m.20780	289	0	0	3	0	0	0	0	0	3	0	1	0	2	0	0	1	1	2	-0.185	-0.4723	0.470786	0.719111	0.048029
1446	lcl|c235283_g6_i2|m.20781	262	0	0	0	0	2	0	1	0	0	0	2	0	0	0	0	1	0	0	-0.065	-0.1568	0.945365	0.711591	0.212222
1447	lcl|c235294_g4_i1|m.20789	281	2	2	3	2	2	0	4	2	3	0	2	1	1	0	3	3	2	1	-0.281	-0.8688	0.037265	0.672781	0.002342
1448	lcl|c235326_g4_i1|m.20819	323	2	1	3	1	1	1	1	1	4	2	2	2	5	3	4	4	2	0	-0.244	-0.8077	0.061498	0.680566	0.004049
1449	lcl|c235384_g3_i1|m.20867	691	1	1	0	0	0	1	0	1	1	1	0	1	0	1	1	2	1	0	0.167	0.3968	1	0.429184	0.543822
1450	lcl|c235389_g5_i2|m.20890	215	0	0	0	0	1	0	1	0	1	0	0	0	1	0	1	1	1	0	0.095	0.2334	1	0.5597	0.477946
1451	lcl|c235399_g7_i4|m.20891	707	6	5	4	4	5	4	6	5	5	2	4	7	5	2	5	6	5	4	-0.019	-0.091	0.980725	0.69903	0.261133
1452	lcl|c235446_g2_i1|m.20934	532	0	2	0	1	0	2	0	2	0	3	0	3	0	5	1	2	0	0	0.852	2.3986	0	0	0.546927
1453	lcl|c235481_g2_i1|m.20956	146	6	6	12	8	12	6	14	6	8	7	19	8	12	7	19	6	16	7	-0.482	-3.1293	0	0.544088	0
1454	lcl|c235506_g6_i4|m.20981	174	13	8	8	11	6	4	9	8	11	8	22	27	13	9	15	15	12	13	0.101	0.7341	0.789282	0.1285	0.599531
1455	lcl|c235513_g2_i1|m.20994	244	6	3	4	1	5	3	6	5	6	3	6	4	6	2	6	7	7	3	-0.343	-1.5185	2.7e-05	0.610242	1e-06
1456	lcl|c235529_g1_i1|m.21016	271	0	0	1	1	0	0	0	0	0	0	1	0	0	0	0	0	0	0	0.107	0.2417	1	0.55409	0.48206
1457	lcl|c235548_g1_i1|m.21054	503	1	2	1	1	1	1	1	4	1	4	2	2	2	3	2	4	3	3	0.636	1.9377	1.4e-05	1e-06	0.560337
1458	lcl|c235551_g1_i10|m.21061	420	1	0	0	0	0	1	0	0	0	0	0	0	0	1	0	0	0	0	0.069	0.1616	1	0.603486	0.438802
1459	lcl|c235585_g2_i7|m.21110	173	0	2	3	2	2	2	3	3	2	1	4	1	3	1	2	1	5	2	-0.324	-1.0192	0.009549	0.654672	0.000535
1460	lcl|c235619_g2_i4|m.21138	294	1	0	0	0	1	0	2	0	1	0	0	0	1	0	2	0	1	1	-0.083	-0.1797	0.927617	0.714918	0.195866
1461	lcl|c235627_g4_i3|m.21149	489	0	0	0	0	0	1	0	0	0	0	0	0	0	0	0	0	0	1	0.099	0.2294	1	0.562362	0.475932
1462	lcl|c235627_g4_i5|m.21151	307	1	0	2	1	0	0	2	0	0	0	0	0	1	0	1	1	1	1	-0.064	-0.1526	0.948338	0.710924	0.215268
1463	lcl|c235649_g2_i5|m.21175	789	2	4	4	3	3	2	4	2	5	2	4	2	2	2	4	2	3	4	-0.152	-0.5596	0.316045	0.711024	0.027531
1464	lcl|c235651_g1_i2|m.21178	1951	1	0	5	1	5	2	4	0	1	0	2	0	2	0	6	0	3	0	-0.835	-2.5604	0	0.556911	0
1465	lcl|c235690_g8_i1|m.21219	229	0	2	2	2	2	0	2	2	0	0	0	1	2	1	0	1	2	0	-0.014	-0.0357	0.995617	0.684843	0.303082
1466	lcl|c235712_g3_i3|m.21245	216	0	0	1	0	0	1	0	1	0	0	0	0	0	1	1	1	1	0	0.11	0.2411	1	0.554499	0.481765
1467	lcl|c235722_g2_i1|m.21267	607	0	0	0	0	2	0	3	0	1	0	0	0	1	0	3	0	0	1	-0.266	-0.676	0.159999	0.697408	0.011909
1468	lcl|c235735_g2_i4|m.21279	429	26	27	46	52	43	38	33	30	37	29	27	27	42	36	38	39	43	40	0.119	1.5043	0.004499	0.000188	0.575631
1469	lcl|c235740_g2_i2|m.21282	386	0	1	1	0	0	0	0	0	1	0	1	0	0	0	0	1	0	0	0.044	0.099	1	0.635048	0.399657
1470	lcl|c235743_g4_i1|m.21296	156	12	8	20	14	13	6	14	11	15	7	20	10	12	5	19	9	18	10	-0.42	-3.1029	0	0.54461	0
1471	lcl|c235754_g3_i10|m.21302	393	1	2	2	1	2	2	2	2	2	2	2	1	2	1	2	1	2	0	-0.128	-0.3511	0.698163	0.724741	0.093726
1472	lcl|c235757_g3_i5|m.21305	1487	17	19	13	11	33	14	28	13	21	9	19	13	21	19	37	20	42	16	-0.38	-3.5572	0	0.537004	0
1473	lcl|c235769_g7_i2|m.21324	127	2	18	1	11	2	16	6	22	4	36	1	18	7	35	2	33	1	16	2.135	11.673	0	0	0.510713
1474	lcl|c235850_g2_i3|m.21382	245	3	2	2	2	2	1	2	1	4	2	1	1	1	0	1	1	1	1	-0.225	-0.6161	0.231873	0.70469	0.018582
1475	lcl|c235859_g3_i3|m.21393	241	0	0	0	0	0	0	0	0	0	0	0	0	0	0	2	2	0	0	0.151	0.3606	1	0.461492	0.531865
1476	lcl|c235861_g2_i5|m.21394	663	3	8	7	12	10	7	12	10	4	12	12	13	9	8	13	14	10	12	0.334	2.2811	0	0	0.549806
1477	lcl|c235877_g4_i2|m.21429	266	0	0	1	0	0	0	1	1	0	0	0	0	1	1	0	1	1	0	0.143	0.3036	1	0.508671	0.510082
1478	lcl|c235901_g3_i2|m.21452	401	39	62	55	64	79	68	75	64	66	59	72	63	77	60	62	87	78	69	0.155	2.7484	0	0	0.539363
1479	lcl|c235937_g3_i1|m.21493	157	1	1	1	1	1	1	1	1	1	1	1	1	1	0	1	1	1	0	0.088	0.2071	1	0.576719	0.464343
1480	lcl|c235959_g6_i1|m.21503	506	5	7	4	4	5	3	12	7	13	5	10	6	13	7	14	8	7	5	-0.295	-1.627	5e-06	0.60278	0
1481	lcl|c235993_g2_i2|m.21545	397	0	0	0	2	1	2	0	0	0	0	0	0	0	1	1	1	0	2	0.343	0.8272	0.616027	0.076633	0.601612
1482	lcl|c236015_g2_i10|m.21585	234	0	0	1	0	0	0	0	1	0	0	0	0	0	0	0	0	0	0	0.142	0.3359	1	0.482531	0.522883
1483	lcl|c236015_g2_i16|m.21586	240	0	0	0	0	1	0	0	0	0	0	0	0	0	0	0	0	0	1	0.084	0.1904	0.999981	0.586932	0.455263
1484	lcl|c236024_g3_i2|m.21588	305	3	0	3	0	0	0	0	0	2	0	2	0	1	0	0	0	0	0	-0.391	-0.9944	0.012093	0.65752	0.000691
1485	lcl|c236035_g1_i2|m.21599	105	17	11	19	10	18	10	17	13	19	7	19	9	22	8	22	14	17	15	-0.383	-3.0988	0	0.544691	0
1486	lcl|c236087_g2_i1|m.21666	476	3	1	22	3	30	0	5	4	6	0	9	8	10	3	9	3	29	7	-1.17	-6.3395	0	0.514494	0
1487	lcl|c236100_g2_i1|m.21697	551	2	1	3	2	2	2	2	3	2	1	2	0	2	1	3	1	2	1	-0.254	-0.7551	0.092065	0.687338	0.006334
1488	lcl|c236101_g5_i2|m.21702	556	1	0	1	0	0	0	1	1	0	0	0	0	0	0	1	0	1	0	0.063	0.1398	1	0.615149	0.425678
1489	lcl|c236114_g1_i1|m.21718	518	0	0	0	0	3	2	2	1	1	2	1	1	1	1	1	1	1	1	0.039	0.1034	1	0.63302	0.402551
1490	lcl|c236120_g2_i1|m.21731	136	1	2	1	1	5	1	2	3	2	1	0	4	5	3	3	3	5	5	0.079	0.2773	1	0.528737	0.498746
1491	lcl|c236131_g3_i3|m.21740	892	2	3	1	2	6	5	2	4	3	2	4	5	1	3	9	5	5	5	0.183	0.7451	0.77073	0.12139	0.59999
1492	lcl|c236134_g1_i2|m.21741	1203	0	2	6	3	3	2	3	2	1	0	2	2	3	1	7	1	7	4	-0.445	-1.6068	7e-06	0.604138	0
1493	lcl|c236135_g4_i5|m.21746	242	0	0	2	2	2	2	2	2	0	0	3	2	0	0	3	2	2	2	0.02	0.0599	1	0.651885	0.373085
1494	lcl|c236138_g1_i1|m.21748	107	0	0	2	1	1	0	0	0	2	0	0	0	1	0	0	0	1	1	-0.059	-0.1413	0.955712	0.709039	0.223528
1495	lcl|c236172_g4_i2|m.21786	103	0	2	0	1	1	0	0	1	2	1	0	1	1	1	1	1	0	0	0.119	0.2555	1	0.544511	0.488713
1496	lcl|c236174_g2_i1|m.21787	697	2	1	3	1	3	0	4	2	3	0	2	0	3	0	4	2	4	3	-0.588	-1.8586	0	0.588202	0
1497	lcl|c236174_g2_i5|m.21792	712	2	1	2	0	3	0	2	2	2	0	1	0	1	0	3	1	3	1	-0.459	-1.2143	0.001266	0.634569	6e-05
1498	lcl|c236181_g1_i10|m.21802	274	0	0	0	0	1	0	0	0	0	0	0	0	0	0	1	0	1	0	0.095	0.2215	1	0.567542	0.471897
1499	lcl|c236181_g1_i10|m.21804	211	0	0	0	0	0	1	0	1	2	1	0	0	0	0	2	0	0	0	-0.093	-0.2272	0.880846	0.720196	0.163615
1500	lcl|c236194_g2_i2|m.21820	409	0	0	0	0	0	1	1	0	0	0	0	0	0	0	1	0	0	0	0.083	0.1848	0.999781	0.590254	0.452141
1501	lcl|c236195_g2_i1|m.21821	441	1	2	4	4	1	1	1	2	3	2	0	0	4	4	0	0	3	3	0.184	0.5875	0.963322	0.246352	0.586302
1502	lcl|c236195_g2_i3|m.21822	416	1	2	4	4	1	1	1	1	3	4	0	0	4	4	0	0	3	3	0.237	0.7934	0.682405	0.093302	0.601301
1503	lcl|c236195_g2_i4|m.21823	416	0	2	3	4	1	1	1	1	3	2	0	0	4	4	0	0	3	4	0.245	0.761	0.742761	0.11158	0.600545
1504	lcl|c236195_g4_i1|m.21828	433	0	1	3	4	1	1	1	1	2	2	0	0	4	4	0	1	0	1	0.175	0.4847	1	0.345459	0.567378
1505	lcl|c236195_g4_i2|m.21830	418	0	1	4	2	2	2	1	1	2	2	0	0	2	2	0	1	0	1	-0.031	-0.0808	0.984349	0.696669	0.268863
1506	lcl|c236210_g3_i1|m.21846	196	0	0	0	0	0	0	0	2	0	1	0	0	0	0	0	0	2	0	0.123	0.3001	1	0.511404	0.508621
1507	lcl|c236213_g2_i1|m.21849	2164	0	0	0	0	0	0	1	1	0	1	0	1	1	0	1	2	1	0	0.152	0.3495	1	0.471054	0.527914
1508	lcl|c236234_g4_i10|m.21877	731	3	3	3	3	0	0	1	0	0	0	0	1	1	1	1	2	1	0	0.137	0.3748	1	0.449015	0.536723
1509	lcl|c236239_g1_i2|m.21882	883	2	2	3	4	3	3	6	3	3	2	2	2	3	2	3	2	3	4	0.005	0.02	1	0.666986	0.344572
1510	lcl|c236239_g1_i8|m.21884	788	1	3	2	3	2	2	2	2	2	2	1	2	2	2	2	2	2	4	0.434	1.4121	0.011566	0.000535	0.579265
1511	lcl|c236250_g3_i7|m.21896	439	12	14	16	18	12	6	14	11	21	15	13	13	18	13	11	11	16	12	-0.006	-0.0494	0.992959	0.688679	0.292706
1512	lcl|c236256_g2_i1|m.21902	422	1	3	9	3	8	0	15	3	4	0	3	0	3	1	6	1	4	1	-1.046	-3.6768	0	0.535469	0
1513	lcl|c236333_g1_i1|m.22011	656	0	0	0	0	0	0	0	0	0	0	0	0	1	0	0	0	0	1	0.109	0.2506	1	0.547949	0.486378
1514	lcl|c236343_g4_i7|m.22015	802	1	1	2	1	2	0	2	1	2	1	0	0	1	0	1	1	2	1	-0.31	-0.7783	0.077312	0.684349	0.005213
1515	lcl|c236351_g2_i1|m.22019	166	1	1	4	2	3	2	4	2	3	1	5	2	4	0	5	0	5	1	-0.755	-2.3995	0	0.56215	0
1516	lcl|c236356_g1_i1|m.22029	469	1	0	2	1	1	0	1	1	0	1	1	2	1	1	1	1	2	1	0.023	0.0547	1	0.653969	0.369443
1517	lcl|c236360_g3_i2|m.22033	110	1	0	2	3	2	2	2	3	2	2	3	2	4	1	3	1	1	2	0.023	0.0751	1	0.645589	0.383591
1518	lcl|c236389_g1_i1|m.22061	391	0	0	0	0	1	0	3	0	0	0	2	0	1	0	1	0	1	0	-0.156	-0.3736	0.657745	0.724335	0.083553
1519	lcl|c236415_g5_i1|m.22087	393	1	0	1	1	0	0	3	0	0	0	1	0	0	0	0	0	0	0	-0.102	-0.2436	0.861476	0.721531	0.153101
1520	lcl|c236416_g2_i2|m.22088	285	2	1	0	0	0	0	0	0	1	0	0	0	2	1	0	0	1	2	0.011	0.0273	1	0.664373	0.34988
1521	lcl|c236424_g4_i3|m.22101	241	0	1	0	1	0	0	0	1	0	2	0	0	0	1	0	0	1	1	0.203	0.4769	1	0.353076	0.565577
1522	lcl|c236444_g1_i2|m.22121	249	0	0	0	0	0	0	0	0	1	0	2	0	0	0	1	0	0	0	-0.005	-0.0107	0.999182	0.677282	0.321883
1523	lcl|c236445_g2_i1|m.22123	532	2	2	0	1	2	1	2	2	1	1	2	0	1	0	2	1	4	1	-0.279	-0.7916	0.06978	0.682636	0.004654
1524	lcl|c236464_g2_i2|m.22142	188	0	0	0	0	0	0	0	0	0	1	0	1	0	0	2	2	0	1	0.069	0.1539	1	0.607689	0.43423
1525	lcl|c236486_g1_i1|m.22162	1367	9	2	14	9	9	1	7	4	7	1	6	4	11	8	5	2	7	2	-0.673	-3.1418	0	0.543843	0
1526	lcl|c236496_g1_i1|m.22170	143	1	1	0	0	0	0	1	0	0	0	0	0	0	0	0	1	0	0	0.11	0.2535	1	0.545919	0.487764
1527	lcl|c236516_g4_i2|m.22201	400	0	1	1	2	1	4	0	1	0	3	1	4	0	1	1	4	0	2	0.922	2.5254	0	0	0.544077
1528	lcl|c236516_g4_i3|m.22202	396	0	1	1	1	1	3	0	1	0	3	1	4	0	1	1	4	0	2	0.833	2.1553	0	0	0.553282
1529	lcl|c236523_g2_i4|m.22204	474	11	12	20	15	11	8	20	13	11	6	9	7	9	6	9	8	12	12	-0.095	-0.6578	0.179899	0.699666	0.013674
1530	lcl|c236527_g2_i1|m.22205	373	20	24	35	26	26	18	31	22	25	18	31	22	23	21	23	23	28	22	-0.051	-0.5172	0.388269	0.715265	0.036357
1531	lcl|c236537_g2_i3|m.22218	554	0	0	0	0	0	0	0	0	1	0	0	0	1	0	0	0	0	0	0.077	0.1626	1	0.602933	0.439391
1532	lcl|c236555_g1_i1|m.22240	698	0	0	0	0	1	1	0	0	0	0	0	0	0	1	0	1	0	1	0.049	0.1224	1	0.623937	0.414807
1533	lcl|c236562_g3_i1|m.22244	169	23	14	17	9	20	15	32	17	21	15	23	12	24	11	28	18	23	15	-0.354	-3.2334	0	0.542098	0
1534	lcl|c236588_g1_i1|m.22288	208	5	3	5	2	3	5	5	5	4	6	3	2	3	4	4	4	5	3	0.075	0.3141	1	0.500349	0.514377
1535	lcl|c236596_g2_i1|m.22296	998	0	0	1	0	0	0	0	0	0	0	0	0	0	0	0	1	0	0	0.018	0.0394	1	0.659895	0.358593
1536	lcl|c236655_g1_i2|m.22362	255	2	5	1	4	2	3	4	3	5	8	2	6	3	6	5	13	4	10	0.854	3.8915	0	0	0.523607
1537	lcl|c236666_g2_i2|m.22384	183	0	0	2	0	1	1	1	0	1	0	3	1	2	2	2	0	3	0	-0.312	-0.8497	0.043736	0.675197	0.002788
1538	lcl|c236683_g3_i1|m.22390	412	0	0	0	0	0	1	0	0	0	1	0	0	0	0	1	1	0	2	0.176	0.4117	1	0.415438	0.548343
1539	lcl|c236706_g2_i4|m.22417	149	1	1	1	1	1	1	1	0	2	0	2	1	1	0	1	1	2	1	-0.143	-0.3239	0.744761	0.724771	0.107088
1540	lcl|c236734_g2_i3|m.22454	154	4	1	4	0	3	0	3	0	5	0	4	0	6	0	4	0	7	0	-1.257	-3.6581	0	0.535704	0
1541	lcl|c236740_g1_i13|m.22464	247	0	0	0	0	0	0	0	1	0	0	0	0	0	1	0	0	0	0	0.089	0.2047	1	0.578215	0.463059
1542	lcl|c236759_g1_i1|m.22480	569	0	0	0	1	0	0	0	0	0	1	0	0	0	1	0	0	0	1	0.067	0.1561	1	0.606498	0.435543
1543	lcl|c236793_g3_i9|m.22532	862	1	0	2	1	1	0	3	0	1	1	2	0	1	0	1	0	1	1	-0.213	-0.5197	0.383847	0.71503	0.03578
1544	lcl|c236813_g3_i2|m.22564	998	4	37	3	5	0	0	27	24	42	32	13	15	33	11	2	8	19	27	0.279	2.4661	0	0	0.545386
1545	lcl|c236822_g3_i10|m.22574	1357	2	4	3	3	1	1	5	3	1	2	1	2	1	3	0	3	4	5	0.415	1.4441	0.008426	0.000375	0.577967
1546	lcl|c236824_g2_i2|m.22578	367	0	1	0	1	0	1	0	0	0	0	0	1	1	0	0	0	0	1	0.054	0.1221	1	0.624084	0.414617
1547	lcl|c236844_g2_i5|m.22607	257	1	4	4	4	3	4	3	7	5	6	2	4	4	4	4	2	6	2	0.308	1.2582	0.046318	0.002613	0.586077
1548	lcl|c236867_g1_i1|m.22637	133	0	0	1	2	0	0	0	0	0	0	0	0	0	0	1	0	0	0	0.189	0.4354	1	0.393126	0.555075
1549	lcl|c236878_g1_i2|m.22651	567	1	1	1	3	2	1	1	0	0	0	0	0	1	0	0	1	0	1	0.189	0.46	1	0.369502	0.561491
1550	lcl|c236885_g1_i1|m.22657	435	5	3	0	0	4	3	3	3	2	1	0	0	4	2	2	2	0	0	-0.165	-0.5638	0.309303	0.710577	0.026762
1551	lcl|c236885_g1_i5|m.22663	435	4	3	0	0	2	1	2	1	2	2	0	0	4	2	2	1	0	0	-0.249	-0.7352	0.106472	0.689897	0.007459
1552	lcl|c236902_g2_i4|m.22682	207	0	0	0	0	0	0	0	0	0	0	4	5	0	0	0	0	0	0	0.157	0.4522	1	0.377035	0.559518
1553	lcl|c236923_g1_i10|m.22692	509	0	0	0	0	0	0	1	0	0	0	0	1	0	0	1	0	1	0	0.066	0.1472	1	0.611273	0.430196
1554	lcl|c237065_g1_i1|m.22858	217	1	1	1	1	0	2	3	0	2	2	0	1	0	2	0	0	1	0	0.128	0.3188	1	0.49657	0.516257
1555	lcl|c237065_g1_i5|m.22860	217	0	0	0	0	0	1	0	0	0	0	0	0	0	1	0	0	0	0	0.115	0.2515	1	0.547321	0.486809
1556	lcl|c237079_g2_i1|m.22877	153	0	0	3	1	0	1	0	0	0	1	0	0	0	0	0	0	0	1	-0.072	-0.1658	0.93877	0.712961	0.20574
1557	lcl|c237097_g2_i1|m.22905	1780	0	1	2	4	2	2	1	1	1	5	1	3	1	3	1	2	2	2	0.725	2.1757	0	0	0.552686
1558	lcl|c237098_g1_i2|m.22911	357	1	3	5	2	1	0	2	2	1	1	3	2	3	2	3	1	4	0	-0.292	-0.9503	0.018202	0.662732	0.001076
1559	lcl|c237111_g2_i5|m.22926	607	2	1	0	0	0	0	0	0	1	1	0	0	0	0	1	0	1	0	-0.036	-0.084	0.983268	0.697422	0.266436
1560	lcl|c237130_g1_i4|m.22955	312	0	0	0	1	0	1	0	1	0	0	0	0	0	2	0	1	0	1	0.16	0.376	1	0.447949	0.537123
1561	lcl|c237136_g1_i1|m.22958	756	1	0	1	2	6	0	6	4	3	1	6	2	2	4	5	5	5	3	-0.252	-0.9446	0.019169	0.663418	0.001139
1562	lcl|c237136_g3_i1|m.22962	167	1	3	2	1	2	2	2	3	1	1	3	1	1	2	2	3	5	2	0.083	0.2638	1	0.538598	0.492602
1563	lcl|c237191_g2_i2|m.23009	602	0	2	0	0	1	1	1	1	0	0	0	0	0	0	0	0	0	0	0.131	0.2881	1	0.520632	0.503501
1564	lcl|c237191_g2_i5|m.23010	544	3	1	5	1	5	1	5	3	4	2	9	4	4	1	4	4	4	6	-0.445	-1.6846	2e-06	0.598983	0
1565	lcl|c237207_g2_i2|m.23024	438	2	1	1	2	2	1	5	2	5	0	1	0	3	1	2	2	1	1	-0.444	-1.2699	0.000671	0.629582	3e-05
1566	lcl|c237211_g6_i4|m.23025	430	0	1	1	4	1	9	0	5	0	11	0	4	0	3	0	7	1	6	1.746	5.3396	0	0	0.516466
1567	lcl|c237215_g1_i1|m.23031	558	6	2	19	2	11	1	15	4	11	0	18	4	12	2	13	4	12	3	-1.425	-6.1199	0	0.51529	0
1568	lcl|c237237_g1_i5|m.23062	297	4	1	4	5	5	3	10	1	5	1	7	4	5	2	9	1	7	6	-0.647	-2.6373	0	0.554784	0
1569	lcl|c237256_g2_i1|m.23076	181	1	0	0	0	1	0	0	0	0	0	0	0	0	0	1	0	0	1	0.079	0.1814	0.999875	0.592247	0.450228
1570	lcl|c237286_g1_i3|m.23120	331	0	1	1	1	3	1	1	1	3	1	1	1	1	1	1	1	1	2	-0.125	-0.3083	0.770045	0.724545	0.115272
1571	lcl|c237309_g2_i2|m.23145	131	5	1	13	2	8	1	6	0	9	1	3	0	3	1	4	2	6	1	-1.422	-4.3389	0	0.527744	0
1572	lcl|c237311_g4_i1|m.23148	228	0	0	0	1	0	0	0	1	0	0	0	0	0	1	0	0	0	0	0.053	0.121	1	0.624624	0.413918
1573	lcl|c237320_g5_i2|m.23157	214	0	0	2	0	0	0	0	0	1	0	0	0	1	0	0	0	0	0	0.005	0.0121	1	0.669743	0.338787
1574	lcl|c237325_g2_i1|m.23163	377	0	0	1	0	1	0	1	0	0	0	1	0	1	0	1	0	1	0	0.058	0.1273	1	0.621509	0.417903
1575	lcl|c237328_g3_i1|m.23165	318	0	0	3	1	0	0	0	0	0	0	1	0	0	0	1	0	0	0	-0.092	-0.2172	0.891766	0.719262	0.170192
1576	lcl|c237387_g1_i1|m.23217	938	3	3	7	5	7	4	6	6	7	3	5	5	4	4	7	3	5	2	-0.205	-0.9666	0.015675	0.660785	0.000916
1577	lcl|c237405_g1_i2|m.23236	311	0	0	2	2	2	2	2	0	3	0	1	4	1	1	1	1	1	0	0.104	0.2824	1	0.524933	0.501009
1578	lcl|c237440_g3_i2|m.23273	112	2	3	3	0	7	2	6	1	4	1	4	2	2	2	6	2	8	4	-0.672	-2.4913	0	0.559021	0
1579	lcl|c237490_g5_i6|m.23318	1393	0	1	1	1	1	2	1	1	2	1	1	1	1	0	1	1	1	1	0.108	0.2555	1	0.544511	0.488713
1580	lcl|c237504_g2_i2|m.23334	411	0	0	0	0	1	3	0	0	0	0	0	0	0	0	0	0	0	0	0.254	0.6028	0.951907	0.232345	0.588381
1581	lcl|c237535_g3_i3|m.23359	339	0	0	0	0	0	0	0	0	0	0	1	0	1	0	0	0	0	0	0.071	0.1625	1	0.602988	0.439332
1582	lcl|c237550_g1_i1|m.23390	584	5	1	14	7	13	9	17	10	5	3	9	8	3	2	9	5	11	9	-0.296	-1.7353	1e-06	0.595732	0
1583	lcl|c237560_g2_i1|m.23397	563	1	1	1	0	5	2	2	4	4	4	8	7	7	2	8	3	2	1	-0.253	-1.0428	0.007595	0.65202	0.000417
1584	lcl|c237576_g2_i1|m.23437	525	0	0	0	1	0	0	0	0	0	0	0	0	0	0	0	0	0	1	0.024	0.0554	1	0.653691	0.369934
1585	lcl|c237578_g2_i2|m.23441	1089	2	3	7	2	4	2	4	1	4	1	2	2	2	2	3	2	2	3	-0.367	-1.2167	0.001233	0.634347	5.8e-05
1586	lcl|c237587_g5_i1|m.23455	459	5	3	4	1	2	3	4	2	3	2	4	4	2	1	5	3	6	7	-0.14	-0.5496	0.332469	0.71207	0.029436
1587	lcl|c237591_g3_i1|m.23457	337	0	3	1	4	3	2	2	6	2	5	0	6	1	2	0	2	2	2	0.868	3.1732	0	0	0.531413
1588	lcl|c237591_g3_i4|m.23458	533	0	3	2	5	1	2	3	2	0	0	2	8	1	3	0	3	0	2	0.835	2.8578	0	0	0.537136
1589	lcl|c237593_g3_i1|m.23463	246	0	5	1	0	1	2	1	3	0	3	0	0	1	4	0	1	1	0	0.915	2.3412	0	0	0.548296
1590	lcl|c237609_g2_i1|m.23487	603	0	1	2	5	2	3	1	0	3	4	2	3	2	4	2	2	4	3	0.455	1.5891	0.001719	6.7e-05	0.572524
1591	lcl|c237612_g2_i4|m.23492	302	2	0	0	0	0	0	0	0	0	0	0	0	0	0	0	0	0	0	-0.033	-0.0762	0.985863	0.695568	0.272354
1592	lcl|c237613_g1_i3|m.23496	386	0	0	1	0	0	0	0	0	0	0	0	0	0	0	1	0	0	0	0.048	0.1067	1	0.631479	0.404708
1593	lcl|c237638_g1_i15|m.23528	852	0	0	0	1	0	0	0	1	0	0	0	1	0	0	0	0	0	0	0.03	0.065	1	0.649807	0.376634
1594	lcl|c237658_g3_i3|m.23565	341	1	1	0	1	0	0	0	0	0	1	0	0	0	0	1	1	0	1	0.1	0.2203	1	0.56832	0.471278
1595	lcl|c237702_g1_i1|m.23627	104	0	1	4	1	4	0	5	1	3	0	2	0	2	0	4	0	1	1	-0.817	-2.3737	0	0.5631	0
1596	lcl|c237732_g2_i12|m.23671	1173	1	1	2	1	6	0	3	2	2	2	2	0	2	0	4	1	2	0	-0.609	-1.7898	0	0.592337	0
1597	lcl|c237732_g2_i2|m.23675	1218	1	1	2	1	5	0	2	2	2	2	2	0	2	0	5	1	2	0	-0.568	-1.6702	3e-06	0.599922	0
1598	lcl|c237753_g2_i2|m.23709	343	2	2	2	2	3	1	2	1	2	1	2	1	2	0	2	0	2	0	-0.364	-1.0063	0.010803	0.656146	0.000612
1599	lcl|c237774_g3_i4|m.23729	190	1	1	1	0	0	0	0	0	0	0	0	0	0	0	0	0	0	0	0.075	0.1809	0.999897	0.592538	0.449945
1600	lcl|c237814_g2_i3|m.23786	585	0	1	0	0	0	0	0	5	0	5	0	4	0	1	1	11	0	8	1.399	4.2434	0	0	0.521239
1601	lcl|c237814_g2_i4|m.23787	595	0	0	0	0	0	0	0	4	1	2	2	1	0	0	0	3	0	4	0.66	1.877	3.4e-05	1e-06	0.562451
1602	lcl|c237814_g2_i7|m.23790	369	0	0	0	0	0	0	0	4	1	2	1	1	0	0	0	3	0	4	0.705	1.7856	0.000129	5e-06	0.565651
1603	lcl|c237818_g4_i3|m.23793	1174	0	1	0	0	1	1	0	2	0	0	0	0	0	0	0	0	0	0	0.185	0.4301	1	0.398159	0.553617
1604	lcl|c237820_g3_i3|m.23796	343	0	0	0	0	0	0	1	0	0	0	2	0	1	0	0	0	0	0	0.015	0.0339	1	0.661953	0.354647
1605	lcl|c237832_g1_i6|m.23803	124	0	0	0	0	0	0	3	0	0	0	1	0	0	0	2	0	0	0	-0.146	-0.3557	0.690071	0.724685	0.091582
1606	lcl|c237851_g2_i1|m.23817	976	0	0	0	1	1	0	2	0	0	0	0	1	0	1	1	0	0	1	-0.014	-0.0324	0.996237	0.683887	0.305576
1607	lcl|c237891_g2_i2|m.23861	562	0	0	3	1	2	2	3	1	0	1	2	0	1	0	2	1	1	1	-0.343	-0.8521	0.042872	0.674893	0.002728
1608	lcl|c237894_g6_i1|m.23869	115	29	24	29	19	31	13	43	22	33	11	36	24	36	14	42	19	36	17	-0.504	-5.2171	0	0.519088	0
1609	lcl|c237938_g3_i2|m.23906	969	0	1	0	0	0	0	2	1	2	1	2	0	1	2	0	3	1	0	0.114	0.2867	1	0.521693	0.502893
1610	lcl|c237953_g4_i1|m.23928	353	0	2	1	2	1	1	1	4	1	1	0	1	0	1	0	6	1	1	0.764	2.0426	3e-06	0	0.556795
1611	lcl|c237955_g4_i1|m.23930	275	1	0	1	0	1	1	1	0	2	1	1	0	0	1	1	0	0	0	0.034	0.0833	1	0.642062	0.389167
1612	lcl|c237955_g4_i3|m.23932	333	1	0	0	1	2	0	0	0	1	0	1	0	1	0	3	0	0	0	-0.172	-0.4113	0.587077	0.72295	0.068273
1613	lcl|c237969_g1_i5|m.23942	386	2	2	3	2	1	0	1	1	3	2	0	0	5	1	3	1	0	0	-0.335	-0.9196	0.023988	0.66646	0.001452
1614	lcl|c237982_g4_i2|m.23956	393	3	2	4	4	6	2	7	2	5	3	5	2	2	1	6	1	4	2	-0.599	-2.1816	0	0.571158	0
1615	lcl|c237992_g1_i1|m.23966	510	0	0	1	0	0	0	1	1	0	0	1	0	0	0	0	0	0	0	0.038	0.0907	1	0.638799	0.394143
1616	lcl|c238002_g5_i2|m.23979	251	0	1	2	1	1	1	0	0	0	0	5	11	2	2	0	0	0	0	0.389	1.1604	0.100365	0.006455	0.590746
1617	lcl|c238005_g1_i2|m.23984	839	8	0	11	0	10	0	7	0	3	0	1	0	1	0	5	0	6	0	-1.503	-4.3931	0	0.527138	0
1618	lcl|c238005_g1_i4|m.23993	319	0	0	0	0	0	0	0	0	0	0	0	0	1	0	1	0	1	0	0.118	0.271	1	0.533375	0.495906
1619	lcl|c238042_g4_i11|m.24029	334	0	1	0	2	0	2	0	0	0	2	2	12	0	5	0	1	0	0	0.998	2.8248	0	0	0.537801
1620	lcl|c238048_g5_i2|m.24043	1166	0	0	0	1	0	0	0	0	0	0	1	0	0	0	2	0	0	0	-0.067	-0.1547	0.946863	0.71126	0.213743
1621	lcl|c238052_g1_i4|m.24050	406	39	54	66	53	60	63	73	61	66	52	64	109	75	87	69	112	76	112	0.351	6.2948	0	0	0.514212
1622	lcl|c238054_g2_i1|m.24052	179	0	1	0	0	0	0	0	1	1	0	0	0	0	0	1	1	1	2	0.252	0.5586	0.980928	0.27354	0.581873
1623	lcl|c238085_g2_i5|m.24082	222	0	0	0	1	1	0	2	1	2	1	4	0	2	0	2	1	0	0	-0.364	-0.9601	0.016641	0.661558	0.000977
1624	lcl|c238111_g1_i1|m.24102	851	0	0	1	1	1	2	1	0	1	2	1	2	0	2	1	0	0	1	0.386	0.9654	0.345649	0.030829	0.599165
1625	lcl|c238115_g2_i1|m.24111	1077	0	0	0	1	1	1	0	0	1	1	0	0	1	0	0	0	0	0	0.036	0.0842	1	0.641669	0.389775
1626	lcl|c238116_g1_i4|m.24117	449	1	0	1	0	0	1	1	0	0	1	0	0	0	0	1	0	0	0	0.02	0.0457	1	0.657492	0.363084
1627	lcl|c238132_g3_i1|m.24130	333	2	2	8	1	6	0	1	0	9	0	1	0	7	0	1	0	5	0	-1.121	-3.4848	0	0.537997	0
1628	lcl|c238132_g3_i10|m.24131	333	4	3	8	2	10	0	2	0	15	0	6	3	11	1	3	0	9	1	-1.312	-4.6816	0	0.52366	0
1629	lcl|c238132_g3_i4|m.24135	344	1	2	4	1	4	0	1	0	6	0	1	0	5	0	1	0	5	0	-0.816	-2.3978	0	0.562212	0
1630	lcl|c238132_g3_i8|m.24139	219	2	1	3	0	2	0	0	0	3	0	0	0	2	0	1	0	1	0	-0.404	-1.0346	0.008228	0.652935	0.000455
1631	lcl|c238150_g1_i2|m.24167	109	0	0	1	0	1	0	0	0	0	0	0	0	1	0	0	0	0	0	0.103	0.2474	1	0.550173	0.484837
1632	lcl|c238150_g1_i4|m.24170	377	0	0	1	0	1	0	0	0	0	0	0	0	2	0	0	0	0	0	-0.005	-0.0111	0.999144	0.677408	0.321584
1633	lcl|c238164_g1_i1|m.24182	440	0	0	2	2	1	0	1	3	1	0	1	1	1	0	2	1	2	1	0.073	0.1935	0.999975	0.58507	0.456975
1634	lcl|c238169_g1_i1|m.24189	1319	0	1	0	0	0	1	0	0	0	0	0	1	0	0	0	0	0	1	0.028	0.0614	1	0.651278	0.374132
1635	lcl|c238173_g3_i3|m.24203	391	5	1	7	2	3	3	9	3	2	2	4	6	5	4	3	1	7	8	-0.234	-1.0134	0.010095	0.655332	0.000568
1636	lcl|c238175_g2_i3|m.24204	181	2	2	4	2	4	4	4	6	3	2	4	2	2	2	4	5	2	5	0.185	0.7345	0.788622	0.128237	0.599549
1637	lcl|c238196_g2_i3|m.24232	319	0	2	0	0	1	0	0	0	1	0	0	0	2	1	0	0	0	0	0.057	0.1264	1	0.621957	0.417336
1638	lcl|c238295_g3_i1|m.24347	287	0	0	1	0	0	0	0	1	0	0	0	0	0	1	0	1	0	0	0.111	0.2469	1	0.550519	0.484595
1639	lcl|c238296_g3_i2|m.24349	703	0	0	0	0	0	0	1	1	0	0	1	0	1	0	1	0	1	0	0.044	0.0986	1	0.635231	0.399392
1640	lcl|c238327_g2_i6|m.24396	325	0	0	0	0	0	0	0	0	0	0	0	1	0	1	0	0	0	1	0.107	0.2554	1	0.544581	0.488666
1641	lcl|c238338_g4_i1|m.24403	359	1	1	1	1	1	1	2	1	1	1	1	1	1	0	4	0	1	0	-0.245	-0.5708	0.298167	0.709823	0.025519
1642	lcl|c238340_g1_i7|m.24404	174	0	1	0	0	0	0	0	0	0	0	1	0	0	0	1	0	0	0	0.091	0.209	1	0.575527	0.465355
1643	lcl|c238360_g3_i1|m.24417	740	1	2	2	2	2	2	2	3	2	2	2	3	2	1	1	2	3	0	0.157	0.4755	1	0.354441	0.565249
1644	lcl|c238364_g3_i7|m.24424	804	0	1	0	0	1	0	0	0	0	1	0	0	1	1	0	0	0	1	0.115	0.2554	1	0.544581	0.488666
1645	lcl|c238365_g3_i1|m.24425	128	1	2	4	4	2	5	4	4	3	4	4	2	4	4	2	4	4	4	0.314	1.2552	0.04749	0.00269	0.586218
1646	lcl|c238372_g5_i2|m.24429	1317	0	1	1	1	2	1	3	1	2	1	4	0	1	1	5	0	1	1	-0.632	-1.6729	3e-06	0.599745	0
1647	lcl|c238378_g1_i1|m.24441	340	17	14	26	17	18	14	23	19	17	8	20	15	13	4	28	13	22	16	-0.263	-2.2798	0	0.566824	0
1648	lcl|c238381_g2_i2|m.24448	536	1	0	5	2	3	2	3	5	2	2	3	2	4	2	4	2	5	1	-0.285	-1.0719	0.005695	0.648831	0.000305
1649	lcl|c238385_g2_i1|m.24454	147	4	1	4	1	5	2	6	1	2	2	4	3	4	2	4	3	3	2	-0.552	-1.9147	0	0.584959	0
1650	lcl|c238399_g3_i2|m.24483	555	50	105	47	39	84	76	80	87	87	96	92	70	101	45	37	71	61	77	0.205	3.6624	0	0	0.525676
1651	lcl|c238399_g3_i3|m.24484	441	15	35	15	17	27	35	20	24	32	35	38	30	48	18	19	32	30	33	0.232	2.4692	0	0	0.545316
1652	lcl|c238399_g3_i5|m.24485	554	111	218	112	82	218	161	184	159	219	206	211	156	237	109	92	147	133	152	0.082	2.2823	0	0	0.549775
1653	lcl|c238409_g2_i5|m.24505	233	4	5	7	7	4	5	3	7	5	8	4	7	3	5	4	5	4	4	0.475	2.2111	0	0	0.551682
1654	lcl|c238429_g5_i1|m.24515	2361	112	121	162	146	180	128	171	117	140	106	122	120	154	127	149	140	145	115	-0.009	-0.2176	0.891336	0.719301	0.169927
1655	lcl|c238476_g3_i5|m.24565	225	0	1	0	2	1	0	2	1	1	0	3	2	1	3	1	1	3	2	0.154	0.4285	1	0.399674	0.553172
1656	lcl|c238491_g1_i8|m.24586	176	0	0	5	2	3	2	4	4	3	3	4	3	3	3	5	5	5	0	-0.145	-0.5618	0.312512	0.71079	0.027126
1657	lcl|c238537_g2_i3|m.24626	589	30	23	20	19	35	25	37	35	23	20	32	31	30	29	39	42	44	34	0.049	0.6019	0.952614	0.23316	0.588264
1658	lcl|c238537_g2_i6|m.24628	710	37	30	23	24	42	34	43	46	27	25	38	43	37	35	45	56	54	47	0.146	1.7797	0.000141	5e-06	0.565858
1659	lcl|c238537_g2_i7|m.24631	169	11	6	7	2	16	5	19	9	10	9	14	13	18	7	19	18	19	13	-0.313	-2.1284	0	0.573683	0
1660	lcl|c238558_g5_i1|m.24660	190	1	1	1	1	1	1	1	0	1	1	1	0	0	1	0	0	0	1	0.126	0.2862	1	0.522071	0.502675
1661	lcl|c238560_g5_i2|m.24666	220	2	0	2	1	2	3	2	3	1	0	3	5	1	2	3	2	1	0	0.227	0.6723	0.880216	0.173262	0.595676
1662	lcl|c238572_g3_i3|m.24677	327	11	3	10	7	5	3	21	9	5	6	12	4	6	4	12	7	6	6	-0.431	-2.51	0	0.55843	0
1663	lcl|c238581_g1_i1|m.24692	467	21	21	21	13	15	11	34	24	21	15	25	19	22	20	24	27	27	20	-0.059	-0.5559	0.322052	0.711414	0.028224
1664	lcl|c238591_g4_i10|m.24704	396	0	1	1	0	1	1	2	1	1	0	1	0	0	0	1	0	0	0	-0.01	-0.0222	0.997728	0.680851	0.313262
1665	lcl|c238647_g1_i1|m.24759	1032	2	2	1	2	2	2	2	2	1	2	2	2	1	2	4	2	2	2	0.159	0.4815	1	0.348586	0.566646
1666	lcl|c238657_g1_i1|m.24764	1354	0	0	1	0	0	0	0	0	0	0	0	0	0	0	0	0	0	1	0.05	0.1253	1	0.622503	0.416642
1667	lcl|c238662_g3_i1|m.24774	247	1	0	3	0	3	0	1	1	1	0	1	2	0	0	3	1	2	1	-0.289	-0.7387	0.103819	0.689447	0.00725
1668	lcl|c238662_g3_i6|m.24778	207	4	2	10	2	10	1	13	7	11	0	7	1	5	1	8	3	8	2	-1.149	-4.6249	0	0.52436	0
1669	lcl|c238663_g1_i2|m.24780	425	1	4	4	4	4	1	3	2	0	4	4	7	4	3	4	4	4	5	0.312	1.2111	0.067955	0.00408	0.588312
1670	lcl|c238676_g4_i3|m.24804	721	1	0	2	1	1	0	1	2	0	0	0	2	1	0	0	0	0	1	0.136	0.3186	1	0.496731	0.516178
1671	lcl|c238681_g1_i11|m.24819	924	0	1	0	1	1	1	2	4	1	0	1	0	0	0	1	1	2	1	0.136	0.3514	1	0.46943	0.5286
1672	lcl|c238733_g2_i2|m.24867	221	5	18	0	0	7	40	9	60	13	57	0	8	2	11	9	20	3	7	1.662	11.58	0	0	0.510791
1673	lcl|c238738_g2_i3|m.24871	338	0	0	0	0	0	0	0	0	1	0	1	1	1	0	0	0	0	0	0.063	0.1361	1	0.617056	0.423396
1674	lcl|c238754_g1_i3|m.24885	176	1	2	1	3	0	1	1	4	2	2	0	3	1	2	0	2	1	3	0.847	2.3979	0	0	0.546943
1675	lcl|c238754_g1_i9|m.24890	182	1	2	1	3	0	1	1	2	2	2	0	2	1	2	0	2	1	3	0.714	1.9932	6e-06	0	0.558438
1676	lcl|c238756_g1_i5|m.24891	609	3	1	6	3	6	2	5	2	3	1	3	1	4	3	5	3	6	3	-0.576	-2.0599	0	0.577107	0
1677	lcl|c238756_g1_i5|m.24892	478	0	1	1	0	0	0	1	0	0	0	0	0	0	0	1	1	1	0	0.083	0.1887	0.999949	0.587946	0.454319
1678	lcl|c238814_g3_i2|m.24928	476	0	0	0	0	0	1	0	1	0	0	0	1	0	0	1	0	2	1	0.026	0.0646	1	0.649971	0.376356
1679	lcl|c238826_g2_i1|m.24957	390	8	5	8	5	12	4	14	4	15	1	10	3	14	4	15	6	11	6	-0.85	-4.5751	0	0.524977	0
1680	lcl|c238833_g1_i2|m.24965	1650	1	1	3	7	2	3	3	3	1	6	1	5	1	7	2	2	3	4	0.883	3.2157	0	0	0.530772
1681	lcl|c238843_g5_i10|m.24992	952	0	2	1	1	0	1	0	1	1	1	0	0	1	1	0	3	0	0	0.291	0.7223	0.808522	0.136422	0.598966
1682	lcl|c238903_g3_i2|m.25053	510	16	9	17	17	18	10	22	13	14	7	16	14	8	9	21	8	19	9	-0.295	-2.1814	0	0.571167	0
1683	lcl|c238912_g1_i8|m.25068	396	2	2	0	1	0	0	1	0	2	0	0	0	2	1	2	1	1	3	0.015	0.0398	1	0.659744	0.358879
1684	lcl|c238919_g4_i6|m.25079	646	64	0	102	0	30	0	60	0	97	0	59	0	59	0	14	0	65	0	-3.686	-13.5694	0	0.509633	0
1685	lcl|c238994_g2_i1|m.25162	1343	0	0	0	2	2	0	3	1	0	0	0	1	1	0	1	1	2	0	-0.143	-0.3596	0.683116	0.724627	0.08979
1686	lcl|c239007_g1_i1|m.25175	237	2	3	11	3	5	0	5	2	5	1	5	3	11	4	3	1	4	1	-0.785	-3.0095	0	0.546488	0
1687	lcl|c239015_g1_i2|m.25184	153	0	0	2	1	2	1	1	1	1	2	1	1	1	0	1	0	2	0	-0.039	-0.0914	0.980573	0.69912	0.26083
1688	lcl|c239029_g3_i1|m.25195	320	0	1	0	1	0	1	0	0	0	0	0	0	0	0	0	0	0	1	0.09	0.2054	1	0.577779	0.463435
1689	lcl|c239047_g3_i2|m.25233	164	0	0	0	0	2	0	0	0	0	0	0	0	0	0	0	0	0	0	-0.025	-0.057	0.991247	0.690714	0.286938
1690	lcl|c239047_g3_i3|m.25234	458	0	0	2	0	1	0	0	0	0	0	0	0	0	0	0	0	0	0	-0.035	-0.0836	0.983406	0.697329	0.266739
1691	lcl|c239125_g3_i2|m.25324	376	2	2	2	3	2	2	6	3	4	0	4	2	3	2	5	2	4	3	-0.31	-1.1581	0.002338	0.639933	0.000116
1692	lcl|c239132_g4_i1|m.25330	167	2	4	7	15	3	2	2	4	4	4	8	18	3	7	0	9	2	12	0.972	4.8852	0	0	0.518048
1693	lcl|c239136_g4_i3|m.25338	303	0	0	0	1	0	0	1	1	2	0	0	0	0	0	2	0	1	0	-0.112	-0.2639	0.835286	0.722854	0.140583
1694	lcl|c239139_g1_i2|m.25341	1007	5	16	18	21	12	23	14	14	11	11	10	20	15	14	5	8	12	20	0.538	4.0611	0	0	0.52235
1695	lcl|c239139_g1_i7|m.25343	854	4	13	17	18	12	20	12	12	8	9	9	17	11	10	3	4	10	16	0.491	3.3886	0	0	0.528522
1696	lcl|c239148_g1_i1|m.25358	342	0	1	0	0	0	0	0	0	0	0	0	0	1	0	0	0	0	0	0.086	0.1987	0.999792	0.581912	0.459818
1697	lcl|c239191_g2_i1|m.25412	382	0	0	1	0	0	1	0	1	0	0	0	1	0	1	0	0	0	0	0.089	0.2063	1	0.577218	0.463916
1698	lcl|c239210_g2_i1|m.25440	757	0	1	2	0	1	0	1	1	1	0	2	0	1	0	1	0	1	0	-0.1	-0.2435	0.861601	0.721524	0.153164
1699	lcl|c239216_g2_i7|m.25448	249	0	0	0	3	0	0	0	0	0	2	0	1	0	0	0	0	0	0	0.318	0.7998	0.670181	0.089961	0.601396
1700	lcl|c239219_g5_i1|m.25453	402	2	2	2	4	1	3	0	2	2	3	0	2	2	2	2	2	0	1	0.502	1.4863	0.005452	0.000232	0.576316
1701	lcl|c239229_g3_i1|m.25467	1705	0	1	0	0	0	0	0	0	0	0	0	0	0	0	0	1	0	0	0.063	0.1519	1	0.608766	0.433032
1702	lcl|c239238_g1_i3|m.25485	311	0	0	1	0	1	0	0	0	1	0	0	0	0	0	0	0	0	0	0.094	0.2226	1	0.566827	0.472464
1703	lcl|c239240_g3_i4|m.25490	286	2	8	5	4	2	1	7	8	2	4	5	8	10	11	3	4	5	10	0.483	2.5348	0	0	0.543872
1704	lcl|c239261_g1_i11|m.25522	594	2	2	3	4	3	4	2	1	1	2	3	5	3	4	3	4	3	4	0.401	1.5188	0.003842	0.000158	0.575086
1705	lcl|c239261_g1_i12|m.25525	593	0	0	1	2	0	2	0	1	0	1	1	1	1	3	1	1	3	3	0.391	1.0471	0.217774	0.01665	0.595991
1706	lcl|c239269_g3_i1|m.25540	328	0	1	0	0	0	2	0	2	0	0	0	1	0	0	0	0	0	0	0.282	0.6559	0.900172	0.186442	0.594257
1707	lcl|c239275_g1_i1|m.25549	2549	9	6	14	9	17	4	10	2	9	4	6	3	10	7	7	5	8	4	-0.54	-3.1635	0	0.543421	0
1708	lcl|c239281_g1_i1|m.25557	378	78	76	28	10	193	51	180	121	95	65	100	52	121	98	63	18	193	118	-0.365	-7.2	0	0.513045	0
1709	lcl|c239343_g4_i4|m.25612	831	1	1	3	2	1	0	4	1	1	0	2	0	2	1	3	1	3	1	-0.541	-1.5034	3.3e-05	0.611316	1e-06
1710	lcl|c239376_g2_i8|m.25695	789	0	1	0	0	0	0	6	2	0	0	0	0	0	1	0	0	0	0	-0.194	-0.5381	0.351807	0.713239	0.031758
1711	lcl|c239381_g2_i1|m.25706	473	1	2	0	2	1	0	1	2	1	0	2	1	3	0	5	0	2	3	-0.087	-0.247	0.857226	0.721778	0.150965
1712	lcl|c239382_g3_i1|m.25708	448	0	0	1	0	1	0	2	0	0	0	0	0	0	0	0	0	0	0	0.013	0.0293	1	0.663645	0.351328
1713	lcl|c239398_g2_i1|m.25731	302	0	0	0	0	0	0	0	0	1	0	1	0	1	0	1	0	1	0	0.103	0.2386	1	0.556199	0.480534
1714	lcl|c239406_g1_i2|m.25742	324	5	4	3	7	9	2	4	1	10	3	8	4	7	3	10	12	12	9	-0.238	-1.2424	0.000922	0.63201	4.2e-05
1715	lcl|c239409_g1_i2|m.25747	375	65	31	86	34	81	30	61	25	90	23	113	43	109	26	104	46	111	41	-0.841	-12.2209	0	0.509882	0
1716	lcl|c239424_g1_i1|m.25772	267	1	0	0	1	4	2	4	1	0	1	5	2	0	0	1	2	3	1	-0.345	-1.0115	0.010281	0.65555	0.00058
1717	lcl|c239444_g1_i9|m.25795	683	1	1	1	0	2	3	3	1	0	2	0	1	0	1	3	1	3	2	-0.058	-0.1527	0.94827	0.71094	0.215195
1718	lcl|c239464_g2_i1|m.25827	310	0	0	1	0	0	0	0	0	1	0	0	0	0	1	0	0	0	0	0.068	0.16	1	0.604367	0.437858
1719	lcl|c239517_g6_i1|m.25917	455	2	1	1	0	2	0	4	0	3	0	1	0	2	1	1	1	1	0	-0.454	-1.1657	0.002155	0.639187	0.000106
1720	lcl|c239543_g6_i2|m.25954	328	7	5	8	5	10	6	11	6	12	5	10	8	13	5	12	9	15	9	-0.332	-2.0465	0	0.577798	0
1721	lcl|c239546_g1_i2|m.25957	213	1	0	1	3	2	0	3	3	1	1	1	3	2	5	1	1	2	0	0.379	1.1827	0.084801	0.005289	0.589675
1722	lcl|c239561_g1_i2|m.25969	369	0	0	1	0	2	0	2	0	0	0	2	0	0	0	1	0	1	0	-0.191	-0.4779	0.460252	0.718673	0.046432
1723	lcl|c239569_g4_i1|m.25984	1188	2	0	0	1	1	1	2	4	0	1	0	0	0	0	0	0	0	0	0.128	0.3565	1	0.465044	0.530422
1724	lcl|c239584_g1_i11|m.26009	513	0	0	0	0	0	0	1	0	0	1	0	1	1	0	0	0	0	0	0.068	0.1572	1	0.605899	0.436198
1725	lcl|c239610_g1_i3|m.26053	359	4	0	4	1	2	0	5	1	5	1	4	1	4	2	7	1	6	1	-1.184	-3.6165	0	0.536231	0
1726	lcl|c239642_g1_i6|m.26072	532	0	1	1	1	1	1	0	1	0	0	0	0	0	1	0	1	0	1	0.09	0.2053	1	0.577842	0.463381
1727	lcl|c239643_g6_i2|m.26073	1161	0	0	0	0	0	0	0	0	0	0	0	0	1	0	1	0	0	0	0.014	0.0329	1	0.662323	0.353927
1728	lcl|c239652_g2_i1|m.26096	268	13	9	19	10	16	9	16	5	13	3	18	7	9	6	19	8	16	5	-0.647	-4.2833	0	0.528355	0
1729	lcl|c239660_g2_i2|m.26111	243	0	1	0	1	0	0	0	0	0	1	0	0	0	1	0	0	0	0	0.113	0.2632	1	0.53903	0.492323
1730	lcl|c239662_g2_i17|m.26115	420	0	4	1	0	1	0	1	3	1	1	2	1	2	1	0	2	0	1	0.367	0.9554	0.363555	0.033114	0.59949
1731	lcl|c239670_g2_i1|m.26141	281	0	0	3	0	3	1	1	0	0	0	0	0	1	0	0	0	0	0	-0.21	-0.512	0.397522	0.715748	0.037579
1732	lcl|c239673_g1_i2|m.26149	654	0	0	0	0	0	0	0	0	1	0	1	0	0	0	2	0	1	0	-0.043	-0.1043	0.975297	0.701938	0.25109
1733	lcl|c239684_g3_i6|m.26167	1232	12	8	47	24	15	6	12	8	21	7	29	5	26	11	14	5	7	1	-0.723	-5.3881	0	0.518407	0
1734	lcl|c239700_g3_i2|m.26207	275	3	3	2	3	2	5	2	3	1	1	1	6	2	5	1	5	3	5	0.854	3.2159	0	0	0.530769
1735	lcl|c239706_g1_i5|m.26226	151	1	0	0	0	1	0	1	0	2	0	1	0	2	0	1	0	1	0	-0.123	-0.2807	0.811872	0.723683	0.130663
1736	lcl|c239719_g1_i1|m.26241	483	0	3	0	4	0	2	2	9	0	2	1	7	0	1	0	2	0	1	1.122	3.0691	0	0	0.533133
1737	lcl|c239722_g4_i5|m.26254	409	3	2	2	1	0	0	5	1	2	2	1	0	1	1	1	1	4	3	-0.285	-0.8122	0.059339	0.679988	0.003893
1738	lcl|c239812_g1_i2|m.26344	155	0	0	1	0	0	0	0	0	0	0	1	0	0	0	0	0	0	0	0.103	0.2356	1	0.558224	0.479045
1739	lcl|c239813_g5_i1|m.26346	1671	0	1	1	1	0	1	0	0	0	2	0	0	0	1	0	1	0	0	0.119	0.2784	1	0.52792	0.499237
1740	lcl|c239814_g2_i1|m.26347	316	0	5	2	1	0	3	2	6	2	3	1	2	1	4	2	4	2	3	0.873	2.8552	0	0	0.537188
1741	lcl|c239814_g2_i3|m.26348	309	0	3	2	1	0	3	2	3	1	1	1	2	1	3	2	1	2	3	0.524	1.5343	0.003236	0.000132	0.574511
1742	lcl|c239816_g8_i1|m.26351	534	9	8	24	10	6	4	14	7	9	4	2	0	12	5	9	5	10	4	-0.51	-2.8409	0	0.549993	0
1743	lcl|c239816_g8_i3|m.26354	511	3	5	16	10	5	3	8	5	8	3	2	0	9	3	7	3	8	2	-0.468	-2.3058	0	0.565751	0
1744	lcl|c239839_g1_i1|m.26410	467	0	0	0	0	0	1	0	0	0	0	0	0	1	0	0	0	0	1	0.087	0.2108	1	0.574393	0.466309
1745	lcl|c239860_g1_i1|m.26440	471	37	8	49	16	46	8	34	15	49	5	39	10	48	12	39	12	36	15	-1.147	-10.1958	0	0.510752	0
1746	lcl|c239860_g1_i2|m.26443	455	43	14	73	27	60	14	40	24	59	8	57	20	65	24	49	24	44	26	-0.821	-8.7281	0	0.512136	0
1747	lcl|c239883_g8_i2|m.26469	278	1	1	3	3	2	2	1	3	0	0	0	0	0	0	1	0	0	0	0.27	0.7736	0.719821	0.1042	0.600896
1748	lcl|c239887_g1_i1|m.26471	543	2	0	1	0	1	0	1	1	0	0	2	0	1	1	1	0	2	0	-0.155	-0.3722	0.660331	0.72437	0.084163
1749	lcl|c239893_g3_i11|m.26489	408	0	0	0	1	1	0	1	0	1	0	1	0	0	0	0	0	1	0	0.092	0.2059	1	0.577468	0.463702
1750	lcl|c239893_g3_i11|m.26493	115	0	0	0	0	1	0	1	0	0	0	0	0	0	0	3	0	1	0	-0.08	-0.1904	0.918226	0.716295	0.188389
1751	lcl|c239894_g3_i2|m.26508	160	9	11	11	8	11	8	13	14	11	8	9	12	14	13	12	15	15	13	0.134	0.9897	0.304077	0.025821	0.598309
1752	lcl|c239956_g2_i4|m.26561	271	33	41	51	55	72	47	65	51	48	39	37	47	42	32	40	44	57	45	0.071	1.0366	0.232197	0.018079	0.59644
1753	lcl|c239962_g2_i3|m.26573	323	0	0	0	0	1	0	0	1	0	0	2	0	0	0	1	3	3	0	0.028	0.0726	1	0.646646	0.381878
1754	lcl|c240014_g2_i1|m.26649	865	0	0	0	0	2	0	1	1	0	0	1	0	1	0	1	1	0	2	0.092	0.2202	1	0.568385	0.471226
1755	lcl|c240035_g1_i1|m.26689	169	1	0	1	0	1	0	2	1	1	0	1	0	1	0	0	0	1	0	-0.037	-0.0871	0.982172	0.698141	0.264087
1756	lcl|c240053_g2_i1|m.26700	147	3	0	6	2	5	3	4	0	5	1	3	0	2	0	4	1	6	1	-0.936	-2.8664	0	0.549448	0
1757	lcl|c240071_g1_i1|m.26727	481	0	0	0	0	0	0	0	1	0	0	0	1	0	1	0	0	0	0	0.089	0.2076	1	0.576406	0.46461
1758	lcl|c240077_g1_i2|m.26738	158	1	3	2	2	1	3	3	4	1	4	1	2	0	3	1	4	2	1	0.777	2.2316	0	0	0.551118
1759	lcl|c240077_g1_i4|m.26740	163	0	0	0	1	0	0	0	0	0	0	0	2	0	0	0	3	0	3	0.516	1.375	0.01648	0.000798	0.580822
1760	lcl|c240077_g1_i6|m.26741	223	4	7	6	6	3	5	6	5	3	7	2	4	3	7	3	8	5	5	0.56	2.6806	0	0	0.540771
1761	lcl|c240077_g1_i9|m.26743	441	2	6	6	4	4	6	3	7	3	6	1	3	3	2	5	7	1	3	0.596	2.5567	0	0	0.543398
1762	lcl|c240104_g7_i1|m.26774	284	0	0	0	0	0	1	0	2	0	1	0	1	1	1	0	1	0	3	0.317	0.8204	0.629485	0.079794	0.601586
1763	lcl|c240121_g3_i1|m.26818	163	0	1	0	0	1	0	1	1	0	2	1	1	0	0	0	0	1	1	0.243	0.5642	0.978032	0.268208	0.582784
1764	lcl|c240128_g3_i1|m.26827	249	7	7	9	9	6	4	7	7	7	5	12	9	5	5	10	10	9	7	0.029	0.1756	0.999999	0.595604	0.44693
1765	lcl|c240158_g2_i1|m.26858	432	14	13	16	17	10	14	15	14	16	11	15	12	15	11	13	10	15	11	0.033	0.2583	1	0.542529	0.490034
1766	lcl|c240190_g1_i1|m.26888	208	0	0	1	0	0	0	3	0	0	0	1	0	0	0	0	0	2	0	-0.13	-0.3081	0.77036	0.724541	0.115379
1767	lcl|c240245_g2_i2|m.26954	495	0	1	0	0	0	0	0	0	1	1	0	0	1	0	0	1	0	0	0.125	0.2669	1	0.53636	0.494032
1768	lcl|c240246_g6_i1|m.26956	185	1	1	1	1	1	1	1	2	1	1	0	0	1	0	0	0	1	1	0.145	0.3488	1	0.471651	0.52766
1769	lcl|c240251_g4_i2|m.26962	403	4	3	7	1	2	2	11	5	3	1	7	8	6	6	7	9	12	10	-0.111	-0.5805	0.283163	0.708759	0.023877
1770	lcl|c240253_g1_i1|m.26963	456	27	24	22	22	33	19	37	34	38	16	33	28	34	21	31	36	25	26	-0.062	-0.6797	0.156168	0.696946	0.011576
1771	lcl|c240254_g2_i3|m.26966	235	0	0	1	2	0	0	0	0	1	0	0	0	0	0	0	0	0	0	0.19	0.4588	1	0.370663	0.561191
1772	lcl|c240259_g4_i2|m.26972	437	0	0	1	2	1	1	1	1	1	1	1	1	1	0	1	0	1	2	0.287	0.6981	0.845332	0.153604	0.597562
1773	lcl|c240259_g4_i3|m.26973	694	0	0	1	2	1	1	1	1	1	1	2	1	1	0	2	0	0	1	0.001	0.0022	0.999978	0.673091	0.331482
1774	lcl|c240264_g4_i5|m.26985	332	0	0	1	0	2	0	2	0	1	0	4	0	1	0	3	0	1	0	-0.405	-0.9709	0.015064	0.660275	0.000877
1775	lcl|c240274_g5_i1|m.26994	299	3	1	5	2	6	0	8	3	3	0	5	0	3	0	4	0	4	1	-1.002	-3.204	0	0.542647	0
1776	lcl|c240297_g1_i2|m.27045	787	20	22	28	31	7	7	24	31	28	27	22	36	36	41	12	12	9	16	0.341	3.474	0	0	0.527575
1777	lcl|c240300_g3_i7|m.27053	844	7	5	16	8	20	6	20	3	14	3	10	5	12	5	13	8	15	9	-0.713	-4.4844	0	0.526078	0
1778	lcl|c240300_g3_i7|m.27054	150	4	3	6	5	2	3	4	2	4	1	6	1	6	2	7	2	5	4	-0.462	-1.8347	0	0.589619	0
1779	lcl|c240327_g5_i1|m.27085	127	0	1	1	0	1	0	1	0	0	0	2	0	1	0	0	0	2	0	-0.07	-0.1672	0.937719	0.713167	0.204738
1780	lcl|c240333_g1_i3|m.27087	463	1	4	5	8	5	3	5	12	7	2	1	1	5	3	1	1	3	3	0.266	1.11	0.144179	0.009971	0.593142
1781	lcl|c240357_g2_i2|m.27113	1100	0	0	4	1	0	0	0	0	1	1	3	0	0	0	1	0	1	0	-0.347	-0.8861	0.032149	0.670609	0.001994
1782	lcl|c240370_g1_i1|m.27121	1974	0	0	0	0	0	0	1	0	0	0	0	1	0	0	0	1	1	0	0.055	0.1243	1	0.622999	0.416011
1783	lcl|c240403_g1_i1|m.27200	586	0	0	0	0	0	0	1	0	0	0	0	0	0	0	1	0	0	0	0.083	0.1825	0.999818	0.591604	0.450848
1784	lcl|c240440_g6_i6|m.27259	531	15	16	24	13	18	12	21	17	19	12	11	17	25	24	18	19	26	12	-0.054	-0.4955	0.427515	0.717217	0.041679
1785	lcl|c240453_g2_i2|m.27266	154	0	0	1	0	0	0	1	0	4	1	3	0	2	0	1	0	1	0	-0.345	-0.8794	0.034051	0.671448	0.002123
1786	lcl|c240454_g4_i1|m.27268	132	0	0	0	0	0	0	1	0	0	0	0	0	1	0	0	0	0	0	0.117	0.2585	1	0.542387	0.490128
1787	lcl|c240476_g1_i3|m.27281	865	0	0	1	0	4	0	3	0	0	0	4	1	1	1	2	2	2	3	-0.323	-0.9242	0.023027	0.665896	0.001389
1788	lcl|c240476_g1_i3|m.27282	365	0	0	0	0	0	0	0	0	0	0	0	1	1	0	0	1	0	0	0.119	0.2735	1	0.531542	0.497038
1789	lcl|c240483_g1_i3|m.27286	742	0	1	4	0	4	1	4	1	2	0	2	2	1	0	12	1	7	1	-1.108	-3.3255	0	0.540467	0
1790	lcl|c240483_g1_i4|m.27290	743	0	2	6	0	4	1	4	1	2	0	4	2	2	0	13	2	7	1	-1.073	-3.4503	0	0.538496	0
1791	lcl|c240483_g1_i6|m.27294	959	1	1	5	1	5	1	7	1	2	0	6	2	2	0	17	1	10	2	-1.353	-4.23	0	0.528937	0
1792	lcl|c240483_g2_i2|m.27308	226	0	0	1	0	1	0	1	1	0	0	1	0	0	0	2	0	1	0	0.022	0.0507	1	0.655547	0.366625
1793	lcl|c240483_g2_i3|m.27310	867	16	9	62	16	53	10	52	15	26	1	36	16	22	6	64	19	53	18	-1.076	-9.8104	0	0.511381	0
1794	lcl|c240488_g1_i6|m.27324	522	2	2	1	1	1	2	1	3	1	1	1	2	1	4	1	1	1	2	0.652	1.7378	0.000253	1e-05	0.567318
1795	lcl|c240514_g4_i1|m.27358	920	0	0	0	0	0	0	0	0	3	0	0	0	0	0	0	1	0	0	-0.134	-0.3185	0.753645	0.724714	0.109878
1796	lcl|c240523_g1_i10|m.27367	821	2	1	2	1	1	1	2	1	1	1	1	0	0	0	1	0	0	1	-0.186	-0.4669	0.480957	0.71952	0.049609
1797	lcl|c240530_g3_i1|m.27385	481	0	1	2	1	3	2	1	3	0	0	0	0	0	0	1	0	1	0	0.14	0.3675	1	0.455463	0.534253
1798	lcl|c240532_g3_i2|m.27393	142	3	3	3	0	2	5	3	1	5	3	2	3	4	3	5	4	1	4	0.102	0.3866	1	0.438451	0.540594
1799	lcl|c240539_g1_i8|m.27414	355	1	1	0	1	1	0	3	0	0	0	0	0	1	1	0	0	1	1	-0.071	-0.1712	0.934549	0.713744	0.201884
1800	lcl|c240612_g3_i13|m.27477	649	1	2	3	3	2	0	2	3	0	0	5	1	5	0	2	1	4	2	-0.339	-1.0108	0.01035	0.65563	0.000584
1801	lcl|c240612_g3_i4|m.27482	193	0	0	1	0	0	0	1	1	0	0	0	0	0	0	0	0	2	0	-0.001	-0.0031	0.999759	0.674837	0.327548
1802	lcl|c240621_g3_i2|m.27488	197	0	1	0	3	1	1	0	2	1	1	1	2	0	0	0	0	0	1	0.439	1.1342	0.12157	0.008114	0.591999
1803	lcl|c240624_g3_i1|m.27496	181	1	0	0	0	0	0	0	0	0	0	0	1	1	0	0	0	1	1	0.108	0.2459	1	0.551209	0.48411
1804	lcl|c240627_g2_i3|m.27500	216	0	0	0	0	0	0	0	0	0	0	0	0	1	0	0	1	0	0	0.06	0.1347	1	0.617773	0.422528
1805	lcl|c240627_g2_i4|m.27503	249	0	0	1	0	0	1	0	0	0	1	0	1	0	1	0	0	0	0	0.075	0.1666	0.999981	0.600706	0.441732
1806	lcl|c240628_g3_i3|m.27511	605	6	7	4	6	5	5	5	2	7	7	10	8	4	6	5	3	9	6	0.035	0.1831	0.999783	0.591252	0.451186
1807	lcl|c240630_g1_i1|m.27515	528	0	0	0	0	0	1	1	0	0	0	0	0	0	1	0	0	0	1	0.056	0.1238	1	0.623246	0.415694
1808	lcl|c240640_g2_i1|m.27531	230	7	10	12	12	11	6	10	12	11	9	13	11	11	11	15	13	16	18	0.13	0.953	0.367904	0.033682	0.599565
1809	lcl|c240682_g3_i1|m.27598	760	0	0	0	0	0	0	1	0	0	0	0	0	1	0	0	0	0	0	0.104	0.2263	1	0.564406	0.474358
1810	lcl|c240683_g1_i2|m.27602	937	0	0	0	0	0	0	0	0	0	0	1	0	0	0	0	0	1	0	0.066	0.1543	1	0.607473	0.434469
1811	lcl|c240688_g3_i1|m.27609	510	25	24	40	24	38	19	42	17	31	15	41	23	43	21	40	21	29	15	-0.455	-4.7725	0	0.522575	0
1812	lcl|c240692_g2_i1|m.27611	127	255	528	418	565	521	460	329	530	276	402	427	444	320	366	376	407	412	383	0.371	15.7239	0	0	0.510016
1813	lcl|c240692_g2_i1|m.27612	124	84	130	107	114	138	215	114	269	86	173	98	164	92	116	122	200	106	145	0.649	15.7598	0	0	0.509983
1814	lcl|c240699_g3_i15|m.27615	699	0	2	1	2	0	0	1	0	1	1	1	0	3	3	0	1	1	1	0.249	0.6219	0.935616	0.215312	0.590729
1815	lcl|c240709_g1_i1|m.27629	552	0	0	1	1	4	1	0	0	0	1	1	2	2	1	2	2	1	1	-0.119	-0.3054	0.774617	0.724483	0.116834
1816	lcl|c240711_g1_i2|m.27634	475	1	1	1	0	2	0	0	1	1	0	2	0	1	0	5	0	3	1	-0.468	-1.2009	0.001469	0.635817	7e-05
1817	lcl|c240720_g1_i3|m.27662	2103	19	8	32	18	16	7	29	13	16	8	16	10	29	11	14	11	18	11	-0.505	-3.9893	0	0.531661	0
1818	lcl|c240724_g2_i1|m.27665	151	0	0	1	0	0	1	0	0	1	0	0	0	1	0	0	0	0	0	0.113	0.2784	1	0.52792	0.499237
1819	lcl|c240732_g2_i4|m.27676	467	0	3	0	0	0	1	0	1	2	4	0	0	3	5	1	3	2	3	0.618	1.8488	5.2e-05	2e-06	0.563439
1820	lcl|c240739_g2_i5|m.27680	256	0	0	0	0	1	0	0	0	0	0	0	0	0	0	1	1	0	0	0.094	0.2185	1	0.569483	0.470344
1821	lcl|c240749_g2_i2|m.27696	547	0	0	0	0	0	0	1	0	0	0	1	0	0	0	0	0	0	0	0.075	0.1792	0.999956	0.593527	0.448982
1822	lcl|c240761_g2_i10|m.27710	930	15	5	11	1	4	1	12	2	4	1	8	3	15	3	15	2	5	1	-1.363	-5.6982	0	0.517259	0
1823	lcl|c240767_g1_i1|m.27718	1413	0	1	0	0	0	0	0	1	0	0	0	1	0	0	0	0	0	0	0.081	0.1913	0.999987	0.586393	0.455761
1824	lcl|c240787_g1_i3|m.27745	502	1	0	0	1	1	0	1	1	0	0	3	1	1	0	1	2	1	1	-0.014	-0.035	0.995754	0.684641	0.303611
1825	lcl|c240794_g1_i2|m.27749	570	2	0	4	0	5	0	6	4	5	0	3	4	2	0	5	5	3	2	-0.378	-1.423	9.9e-05	0.617214	4e-06
1826	lcl|c240794_g1_i3|m.27750	560	0	0	0	0	1	0	3	3	1	0	6	4	1	0	4	5	4	3	0.021	0.072	1	0.646899	0.381466
1827	lcl|c240815_g2_i5|m.27770	381	0	0	1	0	0	0	0	0	0	0	0	0	0	0	2	0	0	0	-0.019	-0.0472	0.99346	0.688077	0.294374
1828	lcl|c240833_g3_i3|m.27779	302	1	1	2	1	5	2	6	4	2	1	3	2	1	2	4	2	6	2	-0.363	-1.2148	0.001259	0.634522	5.9e-05
1829	lcl|c240852_g1_i3|m.27810	523	2	5	5	6	1	4	7	8	1	3	6	8	2	2	2	3	4	3	0.447	1.8789	3.3e-05	1e-06	0.562384
1830	lcl|c240857_g5_i1|m.27819	419	12	12	19	11	16	12	19	10	20	7	18	11	21	11	16	14	17	14	-0.262	-2.0328	0	0.578512	0
1831	lcl|c240868_g4_i3|m.27841	621	0	0	0	0	1	0	0	1	0	0	0	0	0	0	0	0	0	0	0.064	0.1428	1	0.613588	0.427517
1832	lcl|c240872_g2_i3|m.27854	453	1	0	0	1	0	0	0	0	2	0	0	0	0	0	0	0	0	0	-0.013	-0.0302	0.996613	0.683242	0.307236
1833	lcl|c240877_g2_i2|m.27858	172	0	2	2	0	1	1	3	1	3	0	2	1	2	2	2	2	2	0	-0.237	-0.6543	0.183925	0.700096	0.014038
1834	lcl|c240887_g1_i1|m.27877	557	0	0	0	0	0	0	0	0	0	0	0	0	0	0	2	0	1	0	-0.018	-0.0452	0.993892	0.687526	0.295891
1835	lcl|c240899_g4_i7|m.27913	233	1	0	1	2	1	1	1	0	1	0	0	0	0	0	0	0	1	0	0.175	0.4085	1	0.41841	0.547391
1836	lcl|c240901_g2_i12|m.27918	1389	0	0	0	0	0	0	0	0	0	0	0	1	0	1	1	2	0	2	0.231	0.551	0.984843	0.280819	0.580596
1837	lcl|c240904_g2_i1|m.27923	208	0	0	4	0	2	0	0	0	3	0	0	0	2	0	0	0	0	0	-0.356	-0.9147	0.025051	0.667062	0.001522
1838	lcl|c240940_g2_i3|m.27971	980	0	1	0	0	0	2	0	0	0	1	0	0	1	1	0	0	0	0	0.168	0.4028	1	0.423677	0.545669
1839	lcl|c240942_g2_i1|m.27973	623	0	1	0	0	0	1	0	1	0	1	0	2	0	0	0	0	0	1	0.154	0.3701	1	0.453174	0.53514
1840	lcl|c240948_g3_i3|m.27988	196	1	1	1	0	1	1	1	0	1	0	1	1	0	1	1	0	1	0	0.116	0.257	1	0.54345	0.489422
1841	lcl|c240989_g2_i1|m.28022	675	1	8	1	1	8	12	17	25	1	7	0	0	2	9	0	5	1	13	1.05	5.4924	0	0	0.515973
1842	lcl|c241031_g1_i1|m.28098	2812	1	5	30	4	60	11	67	15	23	6	25	3	12	3	54	13	95	6	-1.507	-11.0865	0	0.510332	0
1843	lcl|c241043_g3_i1|m.28111	153	0	1	1	1	0	1	0	1	0	1	0	1	0	0	1	0	0	1	0.108	0.2541	1	0.545497	0.488049
1844	lcl|c241090_g1_i1|m.28152	424	2	1	3	0	2	0	3	1	1	0	2	0	1	1	1	0	2	2	-0.392	-1.0268	0.008874	0.653811	0.000494
1845	lcl|c241105_g3_i4|m.28181	1016	0	0	1	0	0	3	0	0	0	1	2	0	0	1	1	1	1	0	0.164	0.4019	1	0.424505	0.545395
1846	lcl|c241114_g1_i2|m.28195	423	0	0	0	0	0	0	1	0	0	0	1	0	0	0	2	0	1	0	0.026	0.0602	1	0.651764	0.373295
1847	lcl|c241114_g1_i2|m.28196	240	0	0	0	0	1	0	1	0	1	0	1	0	0	0	0	0	1	0	0.092	0.2047	1	0.578215	0.463059
1848	lcl|c241148_g1_i6|m.28240	358	3	2	6	0	5	2	9	2	5	0	4	0	6	4	3	2	5	2	-0.778	-2.8684	0	0.549406	0
1849	lcl|c241174_g2_i10|m.28286	391	8	8	12	11	11	6	9	7	15	7	14	8	9	6	9	6	9	4	-0.257	-1.4981	3.6e-05	0.611696	1e-06
1850	lcl|c241183_g3_i1|m.28296	351	4	1	6	6	3	1	2	0	3	1	3	2	1	0	2	2	3	1	-0.362	-1.1513	0.002513	0.640605	0.000126
1851	lcl|c241220_g4_i2|m.28322	1303	1	0	0	0	0	1	0	1	0	0	0	0	0	0	0	0	1	0	0.009	0.0215	1	0.666454	0.345666
1852	lcl|c241222_g2_i5|m.28326	451	0	0	1	0	0	0	2	0	0	0	1	0	0	0	1	0	1	1	-0.021	-0.0515	0.992495	0.689248	0.291112
1853	lcl|c241242_g1_i1|m.28345	2051	4	1	3	4	6	4	3	2	6	3	2	1	1	3	7	1	4	2	-0.376	-1.3777	0.00018	0.620695	7e-06
1854	lcl|c241251_g1_i1|m.28362	137	3	2	1	2	1	1	2	2	1	1	2	1	2	1	3	2	3	1	-0.196	-0.5247	0.374989	0.714554	0.034648
1855	lcl|c241252_g2_i5|m.28366	1020	0	0	1	0	0	0	1	0	0	0	0	0	0	0	0	0	0	0	0.061	0.1358	1	0.61721	0.42321
1856	lcl|c241286_g1_i3|m.28381	2807	0	0	0	0	0	1	0	0	0	0	0	0	0	1	0	0	0	0	0.034	0.0779	1	0.644395	0.385503
1857	lcl|c241299_g1_i6|m.28386	535	7	9	10	6	8	8	11	8	7	6	10	11	14	7	15	12	11	11	-0.029	-0.1778	0.929186	0.714662	0.197206
1858	lcl|c241317_g4_i4|m.28427	127	1	2	3	3	2	1	3	1	2	1	2	1	1	1	0	1	1	0	-0.123	-0.3502	0.699749	0.72475	0.09415
1859	lcl|c241349_g1_i1|m.28471	745	0	1	0	1	0	0	0	0	0	0	0	1	0	1	0	0	0	0	0.033	0.0732	1	0.646393	0.38229
1860	lcl|c241378_g5_i4|m.28499	613	0	1	0	0	0	0	0	0	0	0	0	0	0	0	1	0	0	0	0.069	0.174	0.999982	0.596521	0.446013
1861	lcl|c241389_g1_i2|m.28515	177	3	2	3	1	2	1	1	2	2	1	1	0	1	0	1	1	1	1	-0.193	-0.499	0.421095	0.716914	0.040781
1862	lcl|c241398_g1_i1|m.28521	2141	0	0	1	1	0	0	0	0	0	0	0	0	0	0	0	0	0	0	0.041	0.0919	1	0.638263	0.394945
1863	lcl|c241408_g3_i1|m.28534	381	0	1	0	0	0	0	0	1	1	0	1	0	1	0	0	0	2	1	-0.001	-0.0022	0.999809	0.674543	0.328217
1864	lcl|c241409_g1_i4|m.28539	192	2	2	3	4	3	1	4	2	4	1	2	2	4	0	3	1	4	3	-0.348	-1.1092	0.003902	0.64488	0.000202
1865	lcl|c241417_g1_i11|m.28547	371	0	1	0	1	0	0	0	0	0	0	0	0	0	0	0	0	0	0	0.033	0.0776	1	0.644523	0.385298
1866	lcl|c241444_g1_i2|m.28576	753	1	0	2	0	2	0	3	2	1	0	3	0	2	1	7	0	4	0	-0.729	-2.1248	0	0.573859	0
1867	lcl|c241466_g2_i10|m.28615	236	14	5	24	14	13	3	12	5	14	4	20	8	16	7	15	7	17	4	-0.759	-4.7184	0	0.523212	0
1868	lcl|c241498_g6_i2|m.28662	760	12	21	22	27	21	14	27	15	20	13	18	18	21	16	32	20	24	13	-0.064	-0.6051	0.247071	0.705973	0.020101
1869	lcl|c241500_g1_i1|m.28663	1013	3	2	5	4	4	0	7	0	4	0	2	0	2	1	0	0	3	0	-0.689	-2.3143	0	0.565407	0
1870	lcl|c241502_g2_i1|m.28666	421	1	0	0	0	0	0	0	0	0	0	0	0	0	0	0	0	1	0	0.072	0.1648	1	0.601711	0.440681
1871	lcl|c241579_g2_i1|m.28728	141	0	1	0	1	0	1	0	1	2	1	0	1	1	0	0	2	0	0	0.114	0.2779	1	0.528292	0.499014
1872	lcl|c241579_g2_i3|m.28729	222	3	0	7	0	6	0	6	5	7	1	8	1	7	2	12	3	8	1	-1.175	-4.5524	0	0.525256	0
1873	lcl|c241637_g2_i6|m.28802	357	0	0	0	1	0	0	1	1	0	0	0	0	1	0	0	0	0	0	0.07	0.1511	1	0.609195	0.432551
1874	lcl|c241649_g4_i1|m.28823	552	3	2	3	3	2	2	7	5	3	2	5	2	1	1	1	1	5	3	-0.189	-0.6936	0.142338	0.695198	0.010393
1875	lcl|c241650_g2_i3|m.28826	629	33	23	39	26	35	22	50	26	44	22	47	23	42	19	37	33	49	31	-0.346	-4.2919	0	0.528261	0
1876	lcl|c241754_g2_i1|m.28913	1407	2	5	4	3	5	5	11	6	4	6	4	3	4	5	3	5	6	6	0.179	0.8419	0.58644	0.07012	0.601612
1877	lcl|c241763_g6_i2|m.28918	445	0	1	0	2	0	0	0	0	0	1	2	0	0	2	0	0	0	0	0.191	0.4791	1	0.35093	0.566091
1878	lcl|c241792_g2_i3|m.28939	623	0	1	3	1	1	1	1	1	0	0	1	0	0	1	0	0	0	0	-0.117	-0.2598	0.840777	0.722616	0.143065
1879	lcl|c241817_g1_i2|m.28964	289	0	8	2	7	0	0	0	1	0	5	0	9	1	8	0	0	0	0	1.395	4.5648	0	0	0.519486
1880	lcl|c241817_g1_i3|m.28966	280	0	8	2	7	0	0	0	1	0	5	0	9	1	7	0	0	0	0	1.391	4.391	0	0	0.520416
1881	lcl|c241824_g2_i8|m.28977	257	0	0	0	0	0	0	0	0	0	1	0	0	0	0	2	1	0	0	0.013	0.0307	1	0.663133	0.35234
1882	lcl|c241856_g2_i4|m.29015	592	1	0	1	0	1	1	2	1	0	0	0	3	2	1	1	2	1	1	0.166	0.4209	1	0.406838	0.551022
1883	lcl|c241857_g5_i1|m.29018	135	0	0	1	0	0	0	0	0	0	0	1	0	0	0	0	0	0	0	0.076	0.1751	0.999996	0.595891	0.446644
1884	lcl|c241873_g2_i3|m.29039	237	0	0	2	0	0	0	1	0	0	0	0	0	1	1	0	0	0	0	0.001	0.0035	1	0.672658	0.332445
1885	lcl|c241873_g2_i3|m.29041	103	1	2	1	5	0	2	1	2	1	2	0	1	0	2	0	3	1	2	0.908	2.4489	0	0	0.545772
1886	lcl|c241874_g1_i1|m.29042	976	71	75	105	87	111	75	92	71	93	66	82	67	103	68	76	75	104	60	-0.095	-1.7696	1e-06	0.593583	0
1887	lcl|c241874_g1_i1|m.29043	476	19	39	44	45	43	30	41	34	30	26	28	30	34	27	31	36	33	28	0.125	1.5909	0.001682	6.6e-05	0.57246
1888	lcl|c241874_g1_i1|m.29044	322	13	8	26	8	31	9	23	15	25	8	22	11	25	11	26	18	32	16	-0.576	-4.7064	0	0.523357	0
1889	lcl|c241874_g1_i11|m.29053	881	40	63	80	73	82	48	74	56	58	37	60	50	66	45	64	60	67	46	-0.047	-0.7873	0.072145	0.68319	0.004829
1890	lcl|c241874_g1_i11|m.29054	577	22	27	33	35	45	33	41	28	32	22	29	28	37	27	29	30	37	24	-0.016	-0.197	0.912193	0.717089	0.183835
1891	lcl|c241874_g1_i7|m.29076	204	16	14	23	18	20	10	16	9	14	8	17	12	18	15	18	12	19	8	-0.261	-2.0748	0	0.576346	0
1892	lcl|c241876_g1_i1|m.29089	1048	0	1	0	0	1	2	0	2	3	3	0	1	2	4	1	1	0	1	0.365	0.9692	0.338957	0.029996	0.599037
1893	lcl|c241900_g1_i11|m.29117	151	0	2	0	2	0	0	1	1	0	1	1	1	0	0	0	1	1	2	0.366	0.8712	0.527099	0.058405	0.601395
1894	lcl|c241909_g1_i6|m.29130	135	0	0	1	0	0	0	0	0	1	0	0	0	2	0	0	0	0	0	-0.013	-0.0308	0.996514	0.683419	0.306783
1895	lcl|c241909_g2_i1|m.29131	174	4	3	6	0	2	1	8	3	9	2	2	0	8	1	2	0	3	0	-0.935	-3.2949	0	0.540993	0
1896	lcl|c241909_g2_i2|m.29132	164	3	1	6	0	1	1	4	2	4	1	0	0	6	1	1	0	3	0	-0.828	-2.3566	0	0.563747	0
1897	lcl|c241909_g2_i3|m.29133	190	4	3	5	0	1	1	6	3	8	2	2	0	8	1	1	0	4	0	-0.81	-2.5612	0	0.556888	0
1898	lcl|c241916_g1_i1|m.29146	284	4	2	4	2	4	3	7	3	2	1	4	4	6	2	4	6	6	4	-0.263	-1.1126	0.003767	0.644527	0.000195
1899	lcl|c241916_g1_i7|m.29148	317	8	10	11	6	10	12	16	15	9	9	7	10	9	9	10	10	10	9	0.163	1.1113	0.142884	0.009862	0.593081
1900	lcl|c241976_g2_i1|m.29211	584	1	0	1	1	1	0	1	2	1	0	0	0	1	1	0	0	0	0	0.148	0.3385	1	0.480357	0.523861
1901	lcl|c242001_g1_i2|m.29236	3046	3	3	6	9	6	4	7	0	6	2	8	1	12	1	8	2	4	2	-0.704	-3.1229	0	0.544214	0
1902	lcl|c242047_g5_i1|m.29305	502	0	0	0	0	0	0	1	0	0	0	0	0	0	0	0	0	1	0	0.11	0.2499	1	0.548437	0.486042
1903	lcl|c242066_g1_i1|m.29327	456	2	2	5	3	5	1	7	5	4	1	7	1	4	2	7	3	6	4	-0.572	-2.2294	0	0.568993	0
1904	lcl|c242066_g1_i1|m.29328	373	0	0	0	0	0	0	2	0	0	0	0	0	0	0	0	0	1	0	-0.013	-0.032	0.996308	0.68377	0.305878
1905	lcl|c242078_g5_i1|m.29355	328	2	0	2	1	2	0	3	1	1	0	3	0	1	1	1	0	1	0	-0.437	-1.0934	0.004586	0.646535	0.000241
1906	lcl|c242089_g1_i1|m.29373	335	7	8	11	9	5	4	11	9	8	6	9	5	13	9	5	8	10	8	-0.005	-0.0312	0.996446	0.683536	0.306482
1907	lcl|c242092_g2_i3|m.29375	323	0	0	1	1	0	0	1	0	1	0	0	0	0	0	0	0	0	0	0.111	0.2471	1	0.55038	0.484691
1908	lcl|c242138_g5_i6|m.29443	1858	0	1	1	0	0	0	0	0	1	0	3	1	0	0	1	0	8	2	-0.425	-1.1666	0.002134	0.639099	0.000105
1909	lcl|c242139_g4_i2|m.29446	236	9	2	4	2	4	4	5	4	5	4	7	2	5	2	5	2	3	4	-0.428	-1.7744	1e-06	0.593286	0
1910	lcl|c242146_g1_i10|m.29452	362	1	1	0	1	1	1	2	1	1	0	0	0	0	0	0	0	0	0	0.04	0.0941	1	0.637274	0.39641
1911	lcl|c242185_g2_i2|m.29491	1452	3	1	5	10	5	0	1	3	7	4	4	3	4	2	2	3	1	1	-0.004	-0.0149	0.998728	0.678604	0.318741
1912	lcl|c242193_g2_i1|m.29501	772	34	13	44	9	39	8	48	17	42	7	47	10	39	11	43	9	46	7	-1.259	-11.2849	0	0.51018	0
1913	lcl|c242257_g2_i2|m.29551	1083	0	1	0	1	3	2	1	2	4	2	1	0	2	2	3	2	5	1	-0.223	-0.7051	0.131606	0.693741	0.009496
1914	lcl|c242362_g2_i1|m.29700	2899	5	8	11	13	8	9	8	4	9	8	6	11	8	12	8	6	11	7	0.216	1.2884	0.035861	0.001944	0.584672
1915	lcl|c242362_g2_i1|m.29701	402	0	0	0	1	0	0	0	0	0	0	1	1	0	0	0	0	0	0	0.058	0.1315	1	0.619399	0.420536
1916	lcl|c242373_g3_i2|m.29725	260	6	5	11	5	12	4	9	3	10	3	12	11	11	5	12	8	9	10	-0.362	-2.0477	0	0.577736	0
1917	lcl|c242381_g1_i1|m.29745	585	0	1	0	0	0	0	0	0	1	0	0	1	2	0	0	0	0	0	-0.016	-0.0389	0.995096	0.685758	0.300662
1918	lcl|c242381_g1_i1|m.29746	572	0	2	0	1	1	1	0	0	0	2	2	1	1	0	0	0	0	1	0.15	0.3934	1	0.432286	0.542758
1919	lcl|c242381_g1_i11|m.29750	163	0	0	1	0	0	0	0	0	0	0	1	0	0	0	0	0	0	0	0.095	0.2325	1	0.560302	0.477494
1920	lcl|c242419_g1_i1|m.29781	342	0	0	0	0	0	0	1	0	0	0	0	1	0	1	0	3	0	0	0.286	0.6628	0.891989	0.180835	0.594876
1921	lcl|c242446_g1_i2|m.29796	410	0	0	0	0	0	0	1	0	0	0	0	0	0	0	0	0	1	0	0.092	0.2121	1	0.57357	0.466995
1922	lcl|c242487_g1_i3|m.29848	639	0	0	2	1	1	0	2	0	0	0	2	0	1	0	1	1	1	0	-0.213	-0.4853	0.446402	0.718076	0.044384
1923	lcl|c242487_g1_i5|m.29849	449	0	0	2	1	1	0	2	0	0	0	1	0	1	0	1	1	1	0	-0.109	-0.2768	0.817428	0.723512	0.132929
1924	lcl|c242527_g2_i1|m.29909	272	8	9	8	7	6	10	10	9	9	7	8	11	13	7	9	6	11	11	0.103	0.6468	0.910365	0.193972	0.593391
1925	lcl|c242541_g2_i5|m.29922	118	1	0	1	1	0	1	2	0	0	0	2	0	1	1	0	0	2	1	-0.178	-0.4442	0.524249	0.721101	0.056693
1926	lcl|c242561_g4_i1|m.29954	521	0	0	1	2	0	0	1	1	0	0	0	0	0	0	1	1	0	1	0.153	0.3516	1	0.469258	0.528672
1927	lcl|c242581_g1_i1|m.29984	583	0	0	1	0	0	0	0	0	0	1	0	0	0	1	0	0	0	0	0.021	0.0475	1	0.656795	0.364362
1928	lcl|c242594_g2_i1|m.30002	772	0	0	0	0	0	1	2	1	1	1	0	0	0	0	0	0	0	0	-0.023	-0.0584	0.990902	0.691082	0.285874
1929	lcl|c242601_g4_i1|m.30016	130	0	0	0	0	1	0	1	1	1	1	0	1	1	2	0	1	1	0	0.199	0.4497	1	0.379442	0.558873
1930	lcl|c242618_g2_i3|m.30039	567	0	0	0	0	0	0	1	0	0	0	1	0	3	0	1	0	1	0	-0.106	-0.2349	0.871899	0.720853	0.158635
1931	lcl|c242633_g1_i1|m.30058	362	83	53	112	65	90	43	97	48	100	34	114	59	98	39	105	71	102	50	-0.51	-9.5556	0	0.511765	0
1932	lcl|c242644_g1_i1|m.30082	509	0	0	0	0	0	0	0	0	0	0	1	0	1	0	0	1	0	0	0.096	0.2265	1	0.564275	0.47446
1933	lcl|c242662_g1_i1|m.30100	252	1	2	1	1	2	1	2	1	3	1	1	1	2	1	2	1	2	2	-0.217	-0.5774	0.28794	0.709101	0.024392
1934	lcl|c242709_g1_i2|m.30167	368	1	2	1	4	0	4	5	6	2	2	1	3	3	4	2	5	0	2	0.746	2.5781	0	0	0.542939
1935	lcl|c242743_g1_i1|m.30188	968	342	387	529	640	396	360	217	206	381	390	373	383	378	282	369	413	522	372	0.137	5.5822	0	0	0.51571
1936	lcl|c242755_g1_i3|m.30192	543	0	1	1	2	0	2	1	2	1	0	0	2	0	1	0	0	0	0	0.394	0.9837	0.31404	0.026989	0.598528
1937	lcl|c242779_g1_i2|m.30211	157	0	0	0	0	0	1	0	0	0	1	0	1	0	2	0	0	0	0	0.206	0.5015	1	0.329009	0.57108
1938	lcl|c242793_g1_i1|m.30226	636	0	1	0	0	0	0	0	0	0	1	0	0	2	2	0	0	0	1	0.102	0.2546	1	0.545145	0.488286
1939	lcl|c242793_g1_i1|m.30227	626	2	0	20	2	19	0	15	0	4	0	13	0	12	0	18	2	15	0	-2.084	-7.1976	0	0.51305	0
1940	lcl|c242802_g6_i1|m.30247	893	1	0	2	0	2	1	3	0	1	0	2	0	1	2	0	1	1	0	-0.198	-0.5077	0.405285	0.71614	0.038616
1941	lcl|c242839_g1_i1|m.30267	1114	0	1	0	0	0	0	0	0	1	0	0	0	0	0	2	1	1	1	-0.043	-0.0979	0.978005	0.700563	0.255917
1942	lcl|c242839_g1_i1|m.30268	880	1	0	3	0	4	0	3	0	1	0	0	0	1	1	0	0	1	1	-0.441	-1.128	0.003211	0.642946	0.000164
1943	lcl|c242865_g1_i1|m.30300	380	0	1	0	0	0	0	0	0	0	0	0	0	1	0	0	0	0	0	0.07	0.1627	1	0.602878	0.439449
1944	lcl|c242868_g4_i4|m.30303	1097	9	6	10	7	7	3	18	8	9	2	12	8	9	5	6	6	11	6	-0.425	-2.4804	0	0.559373	0
1945	lcl|c242894_g3_i1|m.30343	426	1	1	3	1	1	0	3	1	3	0	2	0	2	0	2	0	1	1	-0.493	-1.3547	0.00024	0.622515	1e-05
1946	lcl|c242924_g1_i1|m.30399	364	5	2	7	15	15	21	21	9	16	19	39	28	19	19	36	40	50	57	0.194	1.9652	9e-06	0	0.55939
1947	lcl|c242956_g2_i2|m.30443	354	1	1	0	0	0	0	0	0	0	1	0	1	0	1	0	0	0	0	0.095	0.2213	1	0.567672	0.471794
1948	lcl|c242974_g2_i1|m.30459	240	7	51	15	34	18	28	33	69	29	59	18	35	19	59	14	63	21	48	1.113	12.8414	0	0	0.510378
1949	lcl|c243004_g1_i1|m.30509	1184	0	0	0	0	1	0	0	0	2	1	0	1	1	0	0	1	0	0	0.008	0.019	1	0.667339	0.343842
1950	lcl|c243010_g3_i1|m.30515	226	10	11	18	11	19	11	19	12	18	11	11	13	18	16	14	13	22	13	-0.115	-0.9368	0.020569	0.664361	0.001229
1951	lcl|c243015_g1_i1|m.30516	953	3	1	1	0	0	2	4	1	1	1	1	0	3	0	2	1	2	0	-0.416	-1.0989	0.004336	0.645955	0.000227
1952	lcl|c243059_g4_i3|m.30568	313	2	0	4	0	5	0	4	0	4	0	1	0	2	0	4	0	4	0	-0.956	-2.7614	0	0.551752	0
1953	lcl|c243085_g1_i3|m.30591	653	0	2	0	3	0	4	0	0	0	4	2	6	0	4	1	2	0	1	1.019	2.9436	0	0	0.535448
1954	lcl|c243086_g4_i2|m.30593	186	59	49	59	35	46	28	62	32	57	30	62	41	58	43	74	50	57	42	-0.269	-3.963	0	0.531974	0
1955	lcl|c243095_g1_i1|m.30602	421	0	1	0	0	0	0	0	0	0	0	0	0	0	1	0	0	1	0	0.072	0.1671	0.999954	0.600425	0.442023
1956	lcl|c243112_g2_i2|m.30632	582	1	0	0	0	2	2	1	1	3	1	0	0	1	0	0	0	0	0	-0.029	-0.073	0.986864	0.694787	0.274784
1957	lcl|c243149_g1_i2|m.30670	199	3	2	4	2	4	2	4	1	4	2	5	2	5	3	3	3	4	1	-0.509	-1.8103	0	0.591087	0
1958	lcl|c243154_g1_i1|m.30688	320	11	11	28	13	17	14	12	13	9	9	14	12	18	14	15	13	17	12	-0.077	-0.606	0.245812	0.705869	0.019973
1959	lcl|c243216_g1_i6|m.30711	199	1	0	2	0	5	0	4	0	5	0	2	0	1	0	1	0	0	0	-0.689	-1.7921	0	0.592196	0
1960	lcl|c243222_g3_i1|m.30722	1442	2	0	2	3	2	2	1	1	2	1	1	0	0	1	3	1	0	1	-0.085	-0.2233	0.88517	0.719842	0.166166
1961	lcl|c243228_g1_i1|m.30729	496	1	0	0	0	1	0	0	1	0	0	1	0	0	1	2	2	0	1	0.076	0.1815	0.99987	0.592188	0.450284
1962	lcl|c243269_g3_i1|m.30762	407	0	2	0	1	0	2	0	1	0	1	1	1	0	2	1	1	0	1	0.346	0.8413	0.587631	0.070377	0.601614
1963	lcl|c243300_g2_i1|m.30797	468	0	0	0	0	0	0	0	1	1	0	0	1	0	1	1	0	0	2	0.212	0.5214	0.99677	0.309525	0.575158
1964	lcl|c243326_g1_i1|m.30823	1850	1	0	1	8	4	3	1	3	2	2	0	0	1	1	1	1	1	0	0.595	1.7642	0.000175	7e-06	0.566399
1965	lcl|c243349_g1_i4|m.30872	238	3	2	3	2	3	1	4	1	3	0	3	2	3	0	3	1	3	1	-0.655	-1.9106	0	0.585192	0
1966	lcl|c243393_g3_i1|m.30930	156	13	11	14	6	14	11	25	17	15	10	13	17	16	9	16	25	18	15	-0.001	-0.0074	0.999459	0.676228	0.324346
1967	lcl|c243397_g1_i1|m.30938	286	10	19	0	0	13	5	5	10	17	18	10	14	17	16	11	12	6	10	0.297	2.0596	2e-06	0	0.556242
1968	lcl|c243429_g2_i2|m.30976	1198	2	13	4	19	12	19	9	22	4	19	7	32	4	25	4	22	11	17	1.373	9.1047	0	0	0.512129
1969	lcl|c243458_g1_i2|m.30995	819	1	1	1	1	0	1	1	0	0	2	0	0	0	1	0	0	1	1	0.166	0.4074	1	0.419429	0.547061
1970	lcl|c243493_g3_i2|m.31028	614	1	1	5	3	2	1	2	2	1	1	3	3	3	2	2	2	1	0	-0.057	-0.1787	0.928444	0.714784	0.196571
1971	lcl|c243503_g5_i1|m.31038	766	18	7	17	8	17	7	14	4	20	6	18	5	19	11	25	12	12	12	-0.638	-4.7309	0	0.523063	0
1972	lcl|c243506_g1_i6|m.31041	710	1	0	9	1	3	0	3	0	1	0	5	1	5	1	3	0	5	1	-1.118	-3.3197	0	0.540565	0
1973	lcl|c243516_g2_i1|m.31047	910	7	16	4	9	8	4	11	14	7	15	11	14	10	15	9	13	9	9	0.519	3.6275	0	0	0.526016
1974	lcl|c243516_g2_i2|m.31048	532	2	4	0	4	2	2	3	5	2	4	1	3	3	7	1	3	1	2	0.821	2.7836	0	0	0.538639
1975	lcl|c243541_g3_i2|m.31058	555	0	0	0	0	0	0	0	0	0	0	0	0	1	0	1	1	1	0	0.057	0.1316	1	0.619348	0.420598
1976	lcl|c243554_g1_i5|m.31071	150	13	7	12	9	16	8	13	10	11	6	13	7	11	10	14	6	15	10	-0.303	-2.0114	0	0.579641	0
1977	lcl|c243591_g3_i1|m.31105	164	3	3	4	3	5	4	5	5	3	1	3	4	3	1	4	3	3	2	-0.071	-0.2679	0.829909	0.723073	0.138184
1978	lcl|c243614_g4_i2|m.31123	168	3	0	0	0	6	0	3	0	2	0	7	1	1	0	6	3	3	0	-0.867	-2.6006	0	0.555772	0
1979	lcl|c243628_g3_i2|m.31151	359	4	6	8	8	11	7	8	9	7	7	4	8	9	13	3	7	11	10	0.307	1.8123	8.8e-05	3e-06	0.564717
1980	lcl|c243632_g1_i1|m.31156	358	11	7	11	10	17	9	11	15	13	8	12	8	9	5	13	11	14	10	-0.127	-0.8536	0.04234	0.674703	0.002691
1981	lcl|c243633_g2_i1|m.31165	301	1	1	2	1	3	1	3	2	1	1	2	1	0	0	2	0	2	0	-0.347	-0.9189	0.024137	0.666546	0.001461
1982	lcl|c243633_g2_i1|m.31166	141	1	0	1	0	1	0	1	0	2	0	2	0	1	0	1	0	1	0	-0.056	-0.1392	0.957029	0.708674	0.225072
1983	lcl|c243643_g1_i3|m.31177	709	0	0	0	0	0	0	0	0	0	0	0	0	0	0	0	1	1	0	0.095	0.2281	1	0.563221	0.475273
1984	lcl|c243654_g1_i2|m.31195	309	0	0	1	0	2	0	3	0	0	0	5	0	1	0	3	0	4	0	-0.676	-1.8575	0	0.588267	0
1985	lcl|c243675_g4_i3|m.31228	166	1	1	0	1	1	1	1	1	1	1	1	0	1	1	1	0	1	0	0.084	0.2034	1	0.579021	0.462361
1986	lcl|c243724_g1_i1|m.31250	644	2	2	3	0	3	0	2	0	3	1	2	2	3	2	6	2	2	0	-0.528	-1.5908	9e-06	0.605223	0
1987	lcl|c243765_g1_i1|m.31282	456	4	3	3	4	1	5	4	1	4	4	3	2	6	3	3	4	2	5	0.185	0.7317	0.793253	0.130087	0.599422
1988	lcl|c243774_g1_i2|m.31291	2267	0	1	0	0	0	0	0	1	1	0	0	0	1	1	0	1	2	0	-0.058	-0.1349	0.959603	0.707913	0.228243
1989	lcl|c243791_g1_i1|m.31323	506	6	5	3	6	3	3	5	7	5	4	6	8	7	11	5	6	5	5	0.35	1.7904	0.000121	5e-06	0.565484
1990	lcl|c243799_g1_i1|m.31328	844	2	0	5	3	3	1	2	0	2	1	1	1	2	0	3	0	2	0	-0.518	-1.493	3.8e-05	0.612062	1e-06
1991	lcl|c243813_g3_i2|m.31355	474	1	0	1	0	1	0	1	0	2	0	2	0	2	0	1	0	1	0	-0.157	-0.3709	0.66267	0.724401	0.084732
1992	lcl|c243886_g5_i1|m.31459	358	0	1	0	2	0	3	0	1	1	2	1	2	0	1	0	1	1	1	0.477	1.2589	0.046048	0.002595	0.586044
1993	lcl|c243887_g1_i1|m.31460	432	0	3	1	2	0	4	0	1	1	3	1	5	5	3	0	4	1	3	0.854	2.9329	0	0	0.535655
1994	lcl|c243893_g1_i1|m.31474	705	2	3	6	5	11	4	11	8	1	1	7	5	8	3	3	4	13	6	-0.283	-1.3713	0.000195	0.621198	8e-06
1995	lcl|c243905_g1_i1|m.31490	359	0	0	0	0	0	0	0	0	1	1	0	0	1	0	1	1	0	0	0.038	0.0873	1	0.640308	0.391864
1996	lcl|c243909_g1_i1|m.31505	575	4	1	1	1	2	0	5	1	1	1	2	0	1	1	3	1	1	0	-0.628	-1.5902	9e-06	0.605264	0
1997	lcl|c243913_g1_i1|m.31522	2418	2	0	0	0	1	1	2	2	1	0	1	1	2	0	1	1	2	0	-0.167	-0.4273	0.556557	0.72212	0.062442
[truncated: 51 more rows]

## Sheet: Qspec OL NB vs B
Non-bleached = -LFC			Bleached = +LFC			NB = Non-bleached		B = Bleached
	SeqName	Len	S0	S1	S0.1	S1.1	S0.2	S1.2	S0.3	S1.3	S0.4	S1.4	S0.5	S1.5	S0.6	S1.6	S0.7	S1.7	S0.8	S1.8	LogFoldChange	Zstatistic	fdr	FDRup	FDRdown
1	lcl|c129535_g1_i1|m.155	581	0	0	1	0	0	0	0	0	0	0	1	0	0	0	0	0	0	0	-0.143	-0.3336	1	0.53847	0.714552
2	lcl|c141061_g1_i1|m.229	205	0	0	1	1	0	1	0	0	0	0	2	0	0	0	1	0	0	0	-0.163	-0.4065	1	0.574001	0.660832
3	lcl|c143056_g1_i1|m.250	150	0	0	0	0	0	0	0	0	0	0	5	2	0	0	0	1	0	0	-0.256	-0.7114	0.920832	0.647682	0.297857
4	lcl|c145576_g1_i1|m.265	147	1	7	7	9	7	7	7	8	3	7	10	4	10	9	8	8	11	9	-0.025	-0.1367	0.985525	0.397779	0.801503
5	lcl|c157567_g1_i1|m.372	299	0	0	0	0	0	0	0	1	1	0	0	0	1	0	0	0	0	0	-0.1	-0.2535	0.998926	0.489007	0.758861
6	lcl|c163027_g1_i3|m.422	260	3	4	3	3	3	3	3	4	3	3	1	3	2	3	1	2	2	3	0.147	0.5623	0.081445	0.008004	0.759837
7	lcl|c164490_g1_i1|m.440	278	23	26	33	37	36	43	32	32	30	30	23	16	18	35	28	25	27	33	-0.017	-0.1853	0.993512	0.438254	0.786517
8	lcl|c167783_g1_i1|m.480	134	1	2	1	3	2	2	0	2	1	1	2	0	1	0	1	1	1	1	0.092	0.2531	0.521635	0.084089	0.815995
9	lcl|c169761_g1_i1|m.505	502	2	9	2	10	2	3	1	0	3	2	6	0	7	9	1	2	0	0	0.29	1.1848	5.9e-05	3e-06	0.678695
10	lcl|c176627_g1_i2|m.576	287	0	0	0	0	10	7	0	0	1	0	4	0	0	0	0	1	0	0	-0.392	-1.2254	0.062113	0.64004	0.006421
11	lcl|c176630_g1_i1|m.578	375	0	0	0	0	0	1	0	0	1	0	0	1	0	0	0	0	0	0	-0.139	-0.3648	1	0.55474	0.693267
12	lcl|c177275_g1_i1|m.586	369	0	0	0	0	0	0	0	1	0	0	1	1	2	2	1	1	2	2	-0.114	-0.2977	1	0.517688	0.736142
13	lcl|c177410_g1_i1|m.597	156	2	2	3	2	1	2	2	2	2	2	1	2	0	2	2	0	0	0	-0.109	-0.3089	1	0.524412	0.729723
14	lcl|c182463_g1_i1|m.663	145	0	0	1	0	1	0	1	0	1	0	0	0	0	2	0	3	1	0	0.178	0.433	0.207776	0.024167	0.784491
15	lcl|c184118_g1_i1|m.691	140	27	22	31	33	36	36	36	29	32	39	40	23	34	36	40	38	41	40	-0.17	-2.2424	0	0.614092	0
16	lcl|c187253_g2_i1|m.744	358	0	0	0	0	0	0	0	0	0	0	0	0	0	0	1	0	1	0	-0.124	-0.2981	1	0.517932	0.735917
17	lcl|c188047_g2_i2|m.760	688	1	2	4	3	3	4	1	4	2	5	1	1	2	2	2	1	1	4	0.248	0.8589	0.004496	0.000328	0.712744
18	lcl|c192621_g3_i1|m.866	226	0	0	0	4	0	1	1	8	0	2	0	1	0	3	0	2	1	3	0.758	2.1785	0	0	0.626939
19	lcl|c194625_g1_i1|m.911	173	1	1	2	3	3	3	6	2	4	0	1	7	3	5	10	2	4	2	-0.315	-1.3283	0.022907	0.635384	0.002084
20	lcl|c195423_g1_i1|m.937	184	1	1	0	0	0	0	0	0	0	0	0	0	1	1	1	1	0	1	-0.091	-0.2191	0.996702	0.46436	0.773851
21	lcl|c195573_g2_i1|m.942	190	0	1	0	0	1	1	0	1	0	0	0	0	0	0	0	0	0	0	-0.069	-0.1587	0.989744	0.416494	0.795168
22	lcl|c195747_g2_i1|m.945	100	142	185	142	150	155	156	154	161	173	159	152	36	179	136	166	145	155	163	-0.21	-5.5416	0	0.602799	0
23	lcl|c197607_g1_i1|m.1006	109	0	0	0	0	0	0	0	0	0	0	0	0	0	0	0	0	1	0	-0.14	-0.32	1	0.53086	0.723082
24	lcl|c198066_g1_i1|m.1030	562	0	0	0	0	0	0	0	0	0	0	0	0	0	0	0	0	0	0	-0.103	-0.2544	0.998953	0.489625	0.758439
25	lcl|c198620_g1_i2|m.1049	143	2	2	4	8	4	4	3	5	3	4	4	2	2	3	3	3	2	2	0.074	0.3095	0.410751	0.059002	0.807183
26	lcl|c198665_g3_i2|m.1050	232	0	2	2	2	1	1	1	1	2	2	1	0	2	1	1	0	0	1	-0.103	-0.2674	0.999598	0.498393	0.752154
27	lcl|c199545_g1_i1|m.1080	279	0	0	1	0	1	1	2	1	0	1	2	2	0	0	0	0	1	1	-0.167	-0.4543	1	0.592816	0.617641
28	lcl|c199810_g1_i2|m.1089	141	0	1	0	1	0	0	0	1	0	0	1	0	2	1	1	3	3	1	-0.185	-0.5016	1	0.608319	0.568384
29	lcl|c201141_g1_i1|m.1178	281	2	1	6	1	4	6	1	1	5	3	10	6	2	0	6	0	7	2	-0.677	-2.6997	0	0.609765	0
30	lcl|c201155_g1_i1|m.1182	295	5	11	15	12	10	13	12	20	11	12	6	6	6	9	9	6	7	6	0.06	0.4118	0.237147	0.02849	0.788558
31	lcl|c201157_g2_i3|m.1183	490	0	1	1	0	0	0	0	0	1	0	0	0	0	0	1	1	1	3	0.01	0.0261	0.894111	0.249468	0.827933
32	lcl|c201413_g4_i1|m.1201	149	1	0	2	1	1	2	3	0	0	1	6	3	1	1	2	1	2	2	-0.378	-1.1864	0.087659	0.641919	0.009543
33	lcl|c201441_g1_i1|m.1204	402	1	2	2	4	4	3	2	3	2	3	2	1	2	1	2	3	5	5	-0.012	-0.0448	0.95017	0.314747	0.820614
34	lcl|c201696_g3_i1|m.1219	152	1	2	5	5	3	5	4	2	1	5	4	2	2	2	3	1	5	6	-0.035	-0.134	0.984958	0.395442	0.802231
35	lcl|c201793_g1_i1|m.1223	210	0	1	1	1	1	2	1	0	0	0	0	3	1	2	0	1	1	1	0.219	0.6167	0.05156	0.004774	0.749988
36	lcl|c202129_g1_i1|m.1242	199	8	9	9	10	12	16	12	11	10	19	11	7	12	12	12	8	10	7	-0.064	-0.4676	1	0.597473	0.604445
37	lcl|c202472_g1_i1|m.1259	104	36	26	33	44	36	46	46	66	27	50	43	25	37	44	34	46	48	48	0.051	0.6469	0.039403	0.003536	0.744731
38	lcl|c202641_g1_i1|m.1266	196	3	6	5	3	4	5	4	6	3	4	5	5	6	6	8	6	6	10	0.047	0.2271	0.573651	0.097894	0.8195
39	lcl|c202763_g1_i3|m.1276	200	1	2	2	1	1	2	1	2	0	2	2	1	0	2	1	1	2	0	0.019	0.0557	0.861384	0.223137	0.829225
40	lcl|c202894_g5_i1|m.1285	234	4	9	0	1	1	1	4	8	3	4	0	1	2	8	0	1	0	1	0.465	1.7207	0	0	0.642829
41	lcl|c203039_g1_i1|m.1291	978	0	0	1	2	2	3	2	3	0	0	2	1	1	0	2	2	3	3	-0.016	-0.0474	0.951671	0.317157	0.820228
42	lcl|c203193_g1_i1|m.1308	228	5	7	9	12	11	14	17	15	11	12	8	6	6	10	12	12	11	12	-0.008	-0.0561	0.956479	0.325211	0.818871
43	lcl|c203483_g1_i2|m.1328	267	1	1	1	1	1	2	2	1	2	3	1	2	1	1	2	1	1	2	0.017	0.0483	0.870122	0.229636	0.828995
44	lcl|c203808_g1_i1|m.1339	277	0	0	0	0	0	0	0	0	0	0	0	0	0	0	1	1	1	0	-0.17	-0.4187	1	0.579123	0.650432
45	lcl|c204019_g1_i1|m.1366	306	4	4	4	7	4	7	6	7	3	12	5	5	3	5	6	7	5	7	0.315	1.5776	0	0	0.650714
46	lcl|c204019_g3_i1|m.1367	115	0	0	1	1	1	1	1	2	1	0	1	1	0	1	1	0	1	2	0.062	0.159	0.704117	0.140912	0.826481
47	lcl|c204436_g1_i1|m.1392	704	1	1	1	1	2	1	2	2	1	4	2	3	1	2	3	2	3	2	0.009	0.0283	0.891886	0.247483	0.828063
48	lcl|c204885_g2_i1|m.1407	274	0	0	0	0	0	0	3	0	1	0	3	0	1	1	1	1	0	0	-0.383	-0.9694	0.405185	0.6518	0.063783
49	lcl|c204986_g3_i2|m.1414	274	2	5	5	5	5	5	5	6	4	5	6	2	3	9	6	5	4	4	0.034	0.1752	0.674345	0.129791	0.825144
50	lcl|c205012_g1_i1|m.1420	449	0	1	0	0	0	1	0	0	1	0	0	2	1	0	0	0	1	0	-0.046	-0.1167	0.980534	0.380276	0.806648
51	lcl|c205031_g3_i2|m.1422	388	0	0	0	0	1	0	0	0	0	0	0	0	0	0	0	0	3	2	-0.183	-0.4929	1	0.605684	0.577926
52	lcl|c205047_g1_i2|m.1424	139	0	2	0	1	0	0	0	0	1	1	0	0	0	1	0	0	0	0	-0.017	-0.0415	0.948197	0.311687	0.821093
53	lcl|c205358_g1_i2|m.1452	361	0	2	0	1	0	2	0	2	0	3	0	0	0	0	0	0	0	1	0.175	0.471	0.161425	0.017784	0.777163
54	lcl|c205368_g1_i5|m.1453	406	0	2	0	7	0	4	0	9	0	7	0	13	0	7	0	4	0	8	1.562	5.5363	0	0	0.601509
55	lcl|c205488_g1_i1|m.1464	125	2	3	2	1	6	3	3	1	4	1	4	0	2	1	3	4	4	3	-0.515	-1.755	0.000107	0.622082	6e-06
56	lcl|c205554_g2_i2|m.1468	125	0	2	2	2	1	2	0	1	1	2	1	2	1	1	1	1	2	2	0.184	0.5059	0.125868	0.013241	0.770459
57	lcl|c205697_g1_i1|m.1481	318	21	54	34	41	39	42	50	39	40	40	18	24	43	55	32	45	35	54	0.12	1.5665	0	0	0.651384
58	lcl|c205713_g1_i1|m.1484	352	6	27	8	16	22	10	24	12	21	13	19	3	26	19	16	47	23	22	-0.083	-0.773	0.832617	0.651907	0.222424
59	lcl|c206182_g1_i1|m.1515	148	0	1	1	1	2	1	1	0	3	0	1	0	1	1	1	2	1	2	-0.187	-0.503	1	0.608734	0.566829
60	lcl|c206227_g2_i1|m.1521	189	0	1	0	0	0	0	0	0	0	0	0	1	0	0	0	1	0	0	-0.135	-0.3109	1	0.52559	0.728547
61	lcl|c206351_g3_i3|m.1527	261	0	0	2	1	0	0	0	0	0	0	0	0	0	0	0	0	1	0	-0.22	-0.5404	1	0.618966	0.523317
62	lcl|c206383_g2_i1|m.1532	476	1	0	0	0	1	0	0	0	0	0	1	0	0	0	0	0	0	0	-0.125	-0.3053	1	0.522275	0.731816
63	lcl|c206397_g1_i2|m.1536	116	0	0	0	0	0	0	0	0	0	0	0	0	0	0	0	0	0	0	-0.093	-0.2222	0.996975	0.466663	0.77259
64	lcl|c206417_g1_i2|m.1538	404	0	5	6	10	6	10	8	9	9	8	11	6	7	11	8	9	8	11	0.116	0.682	0.028452	0.002464	0.738829
65	lcl|c206427_g2_i4|m.1541	186	6	6	8	9	9	11	10	8	9	8	12	10	11	7	10	10	10	11	-0.136	-0.892	0.582661	0.653669	0.11037
66	lcl|c206531_g1_i1|m.1558	239	1	7	2	4	5	9	7	11	2	8	3	3	1	7	4	4	3	9	0.625	3.0485	0	0	0.609801
67	lcl|c206556_g1_i2|m.1565	140	1	0	3	4	2	2	4	4	2	4	1	2	1	4	2	1	2	3	0.193	0.6685	0.032301	0.002836	0.741072
68	lcl|c206732_g2_i1|m.1581	175	0	0	0	0	0	0	0	0	0	0	0	0	0	0	0	0	0	0	-0.111	-0.2752	0.999998	0.503514	0.748216
69	lcl|c206819_g1_i1|m.1595	359	0	1	0	0	1	0	0	0	0	0	0	0	1	0	0	1	0	0	-0.136	-0.3221	1	0.532056	0.721793
70	lcl|c206859_g1_i1|m.1600	432	0	0	38	41	22	27	17	27	0	0	0	0	0	0	17	16	41	41	-0.005	-0.0443	0.949876	0.314284	0.820688
71	lcl|c207254_g1_i2|m.1628	119	2	2	4	2	2	0	2	1	2	1	0	1	3	2	5	3	2	3	-0.423	-1.3934	0.01145	0.632725	0.000964
72	lcl|c207332_g2_i2|m.1633	171	0	0	0	0	0	0	0	0	0	0	45	13	0	0	0	0	83	82	-0.312	-2.4963	0	0.611283	0
73	lcl|c207636_g1_i1|m.1667	254	2	0	0	0	0	0	2	0	1	0	0	2	1	2	0	0	0	1	-0.086	-0.2134	0.996288	0.460086	0.776124
74	lcl|c207709_g1_i1|m.1673	168	0	1	0	0	0	0	1	2	1	1	1	1	3	3	0	1	0	0	-0.044	-0.1254	0.982875	0.387942	0.80448
75	lcl|c207931_g1_i1|m.1711	129	0	0	0	0	0	0	0	2	0	1	1	2	0	1	0	0	1	0	0.069	0.169	0.685872	0.133984	0.825682
76	lcl|c207960_g1_i1|m.1712	216	5	4	8	12	3	5	6	11	4	10	10	9	6	5	6	8	5	5	0.178	1.0176	0.000642	4e-05	0.694273
77	lcl|c207967_g2_i1|m.1713	225	1	1	1	3	1	3	4	2	1	1	1	3	0	1	1	1	0	1	0.151	0.4263	0.216787	0.02547	0.785779
78	lcl|c208130_g1_i1|m.1735	249	11	22	22	27	22	33	30	25	20	23	16	11	16	23	14	18	14	17	0.065	0.6134	0.053064	0.00493	0.750572
79	lcl|c208140_g2_i1|m.1739	331	0	0	0	0	1	1	1	0	0	0	2	0	0	0	0	2	3	0	-0.234	-0.6181	0.992521	0.635461	0.422935
80	lcl|c208317_g1_i1|m.1768	292	38	30	24	34	33	34	44	15	40	19	41	31	36	42	60	31	51	32	-0.414	-5.3267	0	0.603189	0
81	lcl|c208387_g1_i1|m.1778	453	0	2	0	0	0	0	0	0	0	0	0	0	0	1	0	0	0	0	-0.107	-0.2713	0.999882	0.500967	0.750201
82	lcl|c208411_g1_i1|m.1783	277	0	1	0	0	0	1	0	1	0	0	1	0	0	0	0	0	1	0	-0.083	-0.201	0.995198	0.450605	0.780875
83	lcl|c208684_g1_i2|m.1827	291	0	0	0	0	0	0	0	0	0	0	1	0	0	0	0	1	0	2	-0.024	-0.0575	0.957208	0.326505	0.818643
84	lcl|c208691_g4_i1|m.1828	107	1	0	1	3	4	5	7	4	2	4	3	11	1	9	4	3	6	7	0.39	1.6409	0	0	0.647045
85	lcl|c208723_g2_i1|m.1834	255	0	1	0	0	0	0	0	2	1	1	0	0	1	0	1	1	1	1	-0.038	-0.094	0.973284	0.35994	0.811807
86	lcl|c208878_g1_i2|m.1846	358	1	1	1	1	3	2	3	4	5	2	3	2	7	4	4	4	3	5	-0.277	-1.0968	0.179346	0.646313	0.022273
87	lcl|c208907_g1_i1|m.1852	471	0	0	0	0	0	1	0	0	0	4	0	0	0	2	0	0	0	0	0.144	0.3706	0.301191	0.038704	0.796324
88	lcl|c208930_g1_i1|m.1861	385	1	1	2	0	0	0	1	2	1	1	1	2	1	2	1	3	2	0	0.088	0.2458	0.536272	0.087819	0.817019
89	lcl|c208940_g4_i1|m.1863	179	1	0	3	4	1	3	0	4	0	2	0	2	0	2	0	4	0	1	0.511	1.4537	1e-06	0	0.658603
90	lcl|c209114_g1_i1|m.1902	450	0	1	0	0	0	2	0	0	1	0	0	0	0	2	0	1	0	1	0.051	0.1236	0.764921	0.167028	0.828603
91	lcl|c209131_g1_i2|m.1905	245	0	1	1	1	0	1	0	0	0	0	0	0	0	0	1	1	0	0	-0.102	-0.2493	0.998682	0.486105	0.760812
92	lcl|c209191_g2_i1|m.1916	149	2	4	2	2	5	2	3	3	4	5	5	5	5	2	2	2	4	4	-0.183	-0.7487	0.87155	0.650561	0.251043
93	lcl|c209256_g1_i1|m.1929	302	0	0	0	0	0	0	2	0	0	0	0	0	0	0	0	0	0	0	-0.211	-0.5088	1	0.610429	0.560327
94	lcl|c209298_g1_i1|m.1944	110	0	0	1	2	0	0	0	0	0	0	0	0	0	0	1	0	0	0	-0.012	-0.0288	0.940075	0.299907	0.822806
95	lcl|c209326_g4_i1|m.1952	155	5	6	13	13	10	14	7	5	6	5	9	6	7	14	9	9	10	12	0.008	0.0551	0.862102	0.223662	0.829209
96	lcl|c209492_g1_i1|m.1979	328	1	0	0	0	1	0	0	1	0	0	0	0	0	0	0	0	0	0	-0.104	-0.2463	0.998428	0.484014	0.762184
97	lcl|c209513_g1_i2|m.1987	221	0	0	0	0	0	0	1	0	1	1	0	1	0	0	0	1	0	1	-0.122	-0.2855	1	0.510113	0.742821
98	lcl|c209565_g1_i2|m.1999	280	21	20	23	36	26	37	28	40	20	41	30	14	26	33	22	24	21	26	0.115	1.2621	1.7e-05	1e-06	0.672439
99	lcl|c209565_g1_i2|m.2000	146	7	14	10	11	8	15	8	14	7	17	13	16	10	14	8	15	13	15	0.347	2.6176	0	0	0.61635
100	lcl|c209570_g1_i3|m.2003	273	4	8	4	5	9	8	9	12	7	9	9	12	6	16	9	10	9	11	0.226	1.4481	1e-06	0	0.65898
101	lcl|c209696_g5_i6|m.2035	148	0	1	1	0	1	1	0	3	1	1	0	0	1	0	0	0	0	0	0.024	0.0599	0.856296	0.219476	0.829329
102	lcl|c209757_g1_i1|m.2044	245	7	14	9	11	13	18	14	11	11	14	16	19	13	19	15	20	18	14	0.111	0.9336	0.001864	0.000127	0.703522
103	lcl|c209829_g4_i8|m.2051	347	0	0	1	0	0	1	0	0	0	0	0	2	1	0	2	0	0	0	-0.126	-0.3158	1	0.528445	0.725627
104	lcl|c209846_g4_i1|m.2055	167	0	0	0	1	1	0	2	2	1	1	1	2	0	0	3	0	0	1	-0.161	-0.4293	1	0.583392	0.641052
105	lcl|c209938_g3_i4|m.2075	165	0	0	0	0	0	0	0	0	0	0	0	0	0	0	0	0	0	1	-0.115	-0.2864	1	0.510681	0.742339
106	lcl|c209946_g1_i6|m.2078	207	1	1	1	1	2	3	0	1	1	1	1	1	0	1	1	1	1	3	0.098	0.2502	0.527439	0.085557	0.816405
107	lcl|c210028_g2_i2|m.2098	195	0	0	0	0	0	1	0	0	0	0	0	1	0	0	1	1	0	0	-0.126	-0.3037	1	0.521318	0.732737
108	lcl|c210031_g1_i2|m.2100	216	2	1	1	3	1	2	3	3	0	1	0	3	0	1	0	1	1	2	0.169	0.4678	0.165016	0.01826	0.77778
109	lcl|c210226_g1_i1|m.2139	123	3	2	5	6	3	5	6	8	5	7	9	12	6	9	11	7	4	5	0.08	0.4475	0.18913	0.021536	0.781697
110	lcl|c210228_g3_i1|m.2141	313	0	0	2	3	1	2	0	0	1	2	0	1	1	2	0	1	0	2	0.181	0.5061	0.125683	0.013219	0.770421
111	lcl|c210230_g1_i1|m.2146	229	0	0	0	0	0	1	0	0	0	0	0	0	0	0	0	0	0	0	-0.12	-0.2886	1	0.512063	0.741154
112	lcl|c210253_g1_i2|m.2149	206	12	20	14	18	16	18	19	23	19	20	19	23	23	19	21	26	19	26	0.082	0.8252	0.006556	0.000494	0.717241
113	lcl|c210315_g2_i1|m.2156	201	0	1	0	0	0	0	1	1	0	1	0	1	0	0	0	0	0	1	-0.136	-0.3137	1	0.527227	0.726886
114	lcl|c210331_g2_i2|m.2158	225	0	2	0	1	1	1	0	2	0	2	0	0	0	1	0	1	0	0	0.096	0.2559	0.516061	0.082688	0.815594
115	lcl|c210338_g2_i1|m.2161	1005	1	4	0	0	1	0	3	0	6	1	0	0	5	1	0	0	1	0	-0.562	-1.6371	0.000576	0.624856	3.5e-05
116	lcl|c210341_g5_i1|m.2162	348	0	0	0	1	0	0	0	1	0	1	0	0	0	0	0	0	0	0	-0.149	-0.3725	1	0.558506	0.687631
117	lcl|c210342_g3_i4|m.2163	180	0	0	0	1	1	1	0	2	0	0	2	1	1	2	1	1	1	2	0.013	0.0334	0.886572	0.242897	0.828345
118	lcl|c210398_g1_i3|m.2174	467	12	23	14	24	14	17	10	21	19	25	21	29	18	27	14	19	19	27	0.31	2.859	0	0	0.612004
119	lcl|c210423_g1_i5|m.2178	136	2	3	3	4	4	5	3	6	2	4	4	9	2	5	2	3	3	7	0.5	2.1093	0	0	0.62874
120	lcl|c210433_g2_i1|m.2180	113	0	0	0	0	0	0	0	0	0	0	0	0	0	1	0	1	0	0	-0.124	-0.3147	1	0.527808	0.726288
121	lcl|c210478_g1_i4|m.2192	239	3	3	5	5	3	7	4	5	3	5	5	4	3	3	6	5	2	4	0.106	0.4802	0.151413	0.016474	0.77539
122	lcl|c210539_g3_i4|m.2197	392	0	0	0	0	1	0	0	0	1	0	0	0	0	0	1	0	0	0	-0.08	-0.1937	0.994468	0.44491	0.783549
123	lcl|c210579_g1_i2|m.2209	180	5	9	3	6	5	4	7	4	6	5	2	0	8	8	3	5	3	4	-0.027	-0.1242	0.98258	0.38689	0.804786
124	lcl|c210580_g1_i3|m.2210	449	1	3	2	3	2	3	3	4	0	2	1	1	0	1	0	2	2	3	0.236	0.7403	0.016075	0.001315	0.729551
125	lcl|c210652_g1_i2|m.2225	192	0	1	0	0	0	0	0	0	1	0	0	0	1	0	0	0	0	0	-0.12	-0.2975	1	0.517566	0.736254
126	lcl|c210652_g1_i3|m.2226	195	0	0	0	0	0	0	0	0	0	0	1	0	0	0	0	4	0	0	0.124	0.3382	0.35742	0.048638	0.802212
127	lcl|c210662_g1_i1|m.2231	102	0	1	0	1	1	0	0	0	0	0	0	0	0	0	0	1	0	0	-0.083	-0.2062	0.995609	0.454611	0.778915
128	lcl|c210720_g2_i2|m.2252	182	0	0	0	0	0	0	0	0	0	0	0	0	0	0	2	4	0	0	0.037	0.0999	0.801876	0.185799	0.82936
129	lcl|c210724_g2_i1|m.2253	513	2	4	5	5	3	3	3	8	3	7	4	3	2	2	5	3	5	5	0.111	0.4685	0.164225	0.018154	0.777645
130	lcl|c210735_g5_i3|m.2260	148	6	5	8	13	5	13	8	14	6	12	9	5	7	10	10	12	8	12	0.245	1.5354	0	0	0.653303
131	lcl|c210749_g1_i1|m.2273	249	22	34	33	35	32	49	37	42	29	34	28	17	28	39	28	33	33	29	0.024	0.2862	0.45591	0.068581	0.810999
132	lcl|c210819_g1_i13|m.2279	185	0	0	0	0	0	0	0	0	0	0	0	0	0	0	0	0	0	0	-0.109	-0.2694	0.999765	0.499716	0.751156
133	lcl|c210886_g2_i1|m.2286	164	0	1	0	0	1	1	1	1	0	0	0	0	0	1	0	0	0	0	-0.121	-0.2792	1	0.506099	0.746147
134	lcl|c210957_g4_i1|m.2306	601	0	0	0	1	0	0	0	2	0	0	0	2	0	1	1	2	0	2	0.189	0.4834	0.148045	0.016038	0.774774
135	lcl|c210994_g1_i1|m.2320	304	6	8	10	11	7	9	10	10	3	11	6	5	5	7	4	8	10	9	0.144	0.8657	0.00416	0.000302	0.711863
136	lcl|c211001_g1_i6|m.2326	539	1	0	1	1	2	3	2	2	1	2	1	0	2	3	4	3	1	4	0.103	0.3387	0.356516	0.048471	0.802123
137	lcl|c211022_g1_i7|m.2328	189	0	0	1	2	1	2	2	2	0	2	0	1	0	1	0	1	2	1	0.02	0.0541	0.863297	0.224537	0.829181
138	lcl|c211142_g1_i1|m.2351	649	0	0	0	0	0	0	0	0	0	0	0	0	0	0	0	0	0	0	-0.149	-0.3652	1	0.554938	0.692978
139	lcl|c211238_g1_i1|m.2379	233	0	0	1	1	0	0	2	1	0	1	1	1	0	0	1	0	0	0	-0.244	-0.6283	0.987776	0.637183	0.409153
140	lcl|c211252_g3_i1|m.2391	349	0	0	0	0	0	0	0	1	0	0	0	0	0	0	0	0	0	0	-0.1	-0.2336	0.997745	0.474993	0.767803
141	lcl|c211278_g7_i1|m.2402	257	0	0	0	1	0	0	0	0	0	0	0	0	0	0	0	0	0	0	-0.13	-0.3264	1	0.534481	0.719122
142	lcl|c211368_g3_i1|m.2426	140	0	1	2	4	2	3	3	3	1	1	3	5	1	3	3	1	1	5	0.303	1.0355	0.000506	3.1e-05	0.69244
143	lcl|c211415_g1_i1|m.2432	158	1	3	5	8	5	6	5	6	2	4	5	5	4	4	5	2	3	6	0.15	0.6898	0.026417	0.002271	0.737549
144	lcl|c211436_g1_i2|m.2434	174	1	1	1	3	1	5	2	4	2	3	0	3	0	1	2	3	0	3	0.536	1.6636	0	0	0.645797
145	lcl|c211551_g6_i4|m.2453	227	0	1	0	0	0	0	0	1	0	0	0	0	0	1	0	0	0	0	-0.156	-0.3627	1	0.553696	0.694778
146	lcl|c211553_g1_i1|m.2455	180	0	0	0	0	0	0	0	0	0	0	0	0	0	0	1	0	1	0	-0.124	-0.3061	1	0.522752	0.731353
147	lcl|c211563_g8_i2|m.2460	139	1	1	1	1	1	2	1	2	1	1	3	2	1	1	1	1	1	1	-0.022	-0.0585	0.95772	0.327429	0.818479
148	lcl|c211604_g1_i1|m.2470	229	3	1	2	1	0	0	1	0	0	3	2	1	1	0	1	0	2	0	-0.31	-0.8261	0.730902	0.653577	0.166304
149	lcl|c211615_g1_i2|m.2471	102	6	7	8	8	6	7	9	7	4	10	5	6	6	8	6	10	6	9	0.145	0.856	0.004646	0.00034	0.713123
150	lcl|c211660_g1_i1|m.2486	379	1	1	2	1	2	1	1	1	3	1	4	0	2	2	3	3	1	3	-0.358	-1.071	0.215851	0.647548	0.027968
151	lcl|c211676_g2_i2|m.2489	407	1	2	3	2	0	0	0	1	2	2	0	3	0	1	0	0	1	1	0.021	0.0606	0.855425	0.218868	0.829344
152	lcl|c211676_g2_i3|m.2490	406	1	2	3	3	0	0	0	1	1	2	0	3	0	1	0	0	1	0	0.14	0.3837	0.279877	0.035179	0.793881
153	lcl|c211774_g2_i1|m.2538	118	3	3	4	5	3	5	4	5	5	7	4	6	4	4	3	2	4	3	0.039	0.1858	0.654359	0.12281	0.824154
154	lcl|c211861_g1_i1|m.2554	151	5	4	10	9	8	13	9	9	15	12	7	14	11	7	12	7	10	12	-0.096	-0.6776	0.954673	0.644135	0.342465
155	lcl|c211914_g5_i4|m.2567	306	2	3	2	2	1	3	1	3	3	2	0	3	2	1	0	3	1	3	0.316	1.0523	0.000403	2.5e-05	0.69076
156	lcl|c211928_g3_i2|m.2574	272	0	0	0	0	0	0	0	0	0	0	0	0	0	0	0	0	0	0	-0.124	-0.2981	1	0.517932	0.735917
157	lcl|c211957_g3_i1|m.2583	182	0	0	0	0	0	0	0	0	0	0	0	0	0	0	0	0	0	0	-0.135	-0.3192	1	0.530403	0.72357
158	lcl|c212026_g3_i1|m.2608	667	54	39	48	45	49	46	44	41	52	46	60	24	40	52	69	32	70	67	-0.324	-4.6141	0	0.604086	0
159	lcl|c212126_g1_i2|m.2626	243	6	5	7	9	4	9	6	10	8	8	6	11	4	10	6	4	6	5	0.175	1.0117	0.000694	4.4e-05	0.694888
160	lcl|c212208_g2_i4|m.2650	217	1	2	2	2	1	1	3	2	1	2	0	0	1	0	0	1	1	1	-0.059	-0.1557	0.989268	0.413979	0.796074
161	lcl|c212237_g2_i1|m.2659	530	5	7	10	17	10	16	15	20	7	12	8	12	10	11	9	10	9	11	0.226	1.5237	0	0	0.654039
162	lcl|c212277_g3_i1|m.2669	123	0	1	0	0	0	0	0	0	0	0	0	0	0	0	0	0	0	0	-0.077	-0.1902	0.99408	0.442149	0.7848
163	lcl|c212582_g2_i5|m.2775	326	0	0	0	0	0	0	0	0	0	0	0	1	0	0	0	0	0	0	-0.131	-0.3246	1	0.53347	0.720245
164	lcl|c212602_g3_i5|m.2781	543	1	0	7	3	9	6	4	2	2	0	3	0	3	1	2	0	10	4	-0.754	-2.8123	0	0.609205	0
165	lcl|c212652_g1_i3|m.2790	341	0	0	0	0	1	2	0	1	0	2	1	2	1	1	1	1	2	1	0.008	0.0203	0.899866	0.25472	0.827561
166	lcl|c212693_g1_i1|m.2804	324	0	0	0	0	0	0	0	0	0	0	1	1	0	0	0	0	3	2	-0.212	-0.5265	1	0.615353	0.539919
167	lcl|c212713_g4_i1|m.2814	173	0	0	0	0	1	2	0	0	0	0	0	0	0	0	0	0	1	1	-0.046	-0.1181	0.980893	0.381514	0.806306
168	lcl|c212727_g5_i1|m.2822	197	7	8	9	16	16	12	5	3	4	10	13	7	2	8	7	3	9	6	-0.102	-0.6286	0.987631	0.637232	0.408747
169	lcl|c212758_g2_i1|m.2827	529	0	0	0	0	0	1	0	0	0	0	0	0	0	0	0	0	0	0	-0.121	-0.2989	1	0.518419	0.735467
170	lcl|c212784_g2_i1|m.2837	282	2	0	3	7	4	8	5	6	2	6	2	4	2	4	5	8	5	6	0.395	1.8094	0	0	0.638725
171	lcl|c212802_g1_i2|m.2844	824	0	0	0	0	0	0	0	0	0	0	0	0	0	0	0	1	0	0	-0.158	-0.3653	1	0.554987	0.692906
172	lcl|c212821_g1_i2|m.2859	163	3	2	5	3	2	5	3	6	5	4	2	5	4	5	4	5	3	1	0.052	0.2254	0.57701	0.098847	0.819714
173	lcl|c212826_g3_i1|m.2861	453	16	18	20	33	28	39	25	39	15	34	21	31	20	32	25	29	22	32	0.301	3.3343	0	0	0.607682
174	lcl|c212839_g1_i3|m.2877	288	4	3	6	4	3	7	6	6	5	9	4	12	3	10	4	4	5	6	0.327	1.6354	0	0	0.647353
175	lcl|c212912_g1_i1|m.2890	190	0	0	0	1	0	0	0	0	0	0	0	0	0	0	0	0	0	0	-0.14	-0.3616	1	0.553146	0.695565
176	lcl|c212928_g1_i1|m.2894	484	0	0	0	0	1	1	0	1	0	0	0	0	0	1	0	0	0	0	-0.166	-0.4286	1	0.583115	0.641681
177	lcl|c212937_g3_i2|m.2900	184	1	2	4	5	2	4	1	2	1	2	2	2	3	2	2	4	1	2	0.245	0.7874	0.009867	0.000771	0.722547
178	lcl|c213022_g4_i5|m.2921	208	2	7	7	6	4	5	6	5	7	2	6	1	4	9	11	6	9	6	-0.268	-1.3791	0.013387	0.633289	0.001146
179	lcl|c213072_g1_i1|m.2941	245	0	0	0	0	0	0	0	1	0	0	0	1	0	0	0	0	0	0	-0.102	-0.2415	0.998255	0.480637	0.764344
180	lcl|c213117_g1_i3|m.2966	244	4	5	8	8	7	9	3	7	8	7	6	6	7	9	7	4	8	7	-0.044	-0.2457	0.998421	0.483594	0.762456
181	lcl|c213134_g1_i3|m.2976	212	0	0	1	0	1	1	0	0	0	0	0	0	0	0	0	0	0	0	-0.152	-0.3779	1	0.56109	0.683585
182	lcl|c213147_g4_i1|m.2980	151	8	4	4	5	8	10	12	9	5	6	9	11	9	11	16	9	16	13	-0.189	-1.2449	0.051915	0.63912	0.005234
183	lcl|c213160_g2_i5|m.2982	128	25	31	31	35	33	34	46	28	38	35	29	26	30	29	34	34	29	34	-0.132	-1.6508	0.000478	0.624504	2.9e-05
184	lcl|c213238_g2_i1|m.2996	498	0	0	0	0	0	0	0	0	0	0	0	0	0	1	1	0	0	0	-0.117	-0.2838	1	0.509037	0.743727
185	lcl|c213259_g2_i1|m.3003	151	0	0	1	0	0	0	0	0	0	1	0	1	0	0	0	0	1	0	-0.116	-0.2787	1	0.505777	0.746408
186	lcl|c213262_g2_i4|m.3006	212	0	1	0	0	0	2	0	3	1	2	2	1	0	1	2	1	2	1	-0.079	-0.2177	0.996545	0.463315	0.774414
187	lcl|c213278_g3_i2|m.3010	328	2	4	2	6	5	7	1	9	3	5	2	4	1	3	2	3	1	3	0.663	2.693	0	0	0.614803
188	lcl|c213306_g2_i1|m.3016	203	1	2	3	3	1	4	2	3	3	4	2	5	1	2	0	0	1	2	0.374	1.211	4e-05	2e-06	0.67652
189	lcl|c213311_g2_i1|m.3017	436	0	0	0	1	0	0	0	2	0	0	0	0	0	0	0	0	0	0	-0.049	-0.123	0.982272	0.385835	0.805089
190	lcl|c213314_g8_i4|m.3021	555	4	5	6	9	6	10	4	8	6	7	4	11	3	6	4	4	5	5	0.328	1.6696	0	0	0.645474
191	lcl|c213369_g2_i2|m.3062	182	1	1	4	1	2	3	0	0	2	2	0	0	2	1	0	0	1	1	-0.329	-0.8805	0.6095	0.653785	0.119012
192	lcl|c213419_g4_i1|m.3080	565	0	1	1	1	0	0	1	1	2	1	0	0	1	0	0	0	0	0	-0.216	-0.5202	1	0.613642	0.547279
193	lcl|c213465_g6_i10|m.3092	373	0	2	1	3	1	2	1	0	2	1	1	0	1	0	1	1	1	0	0.115	0.3072	0.415158	0.0599	0.80757
194	lcl|c213496_g2_i3|m.3109	126	1	3	4	5	5	4	5	6	4	6	4	0	0	5	2	2	2	3	0.101	0.4124	0.236283	0.02836	0.788443
195	lcl|c213534_g3_i4|m.3118	287	4	6	7	9	8	10	7	11	3	7	4	6	5	10	6	9	10	9	0.235	1.3051	9e-06	0	0.669149
196	lcl|c213677_g1_i4|m.3168	563	1	0	4	6	7	7	10	14	2	4	2	0	4	6	7	2	4	3	-0.065	-0.308	1	0.52388	0.730249
197	lcl|c213742_g1_i10|m.3190	163	6	5	6	5	5	6	5	4	5	6	7	8	6	7	8	5	6	5	-0.14	-0.7314	0.89598	0.649354	0.272368
198	lcl|c213743_g5_i1|m.3191	186	1	1	1	1	1	0	1	0	0	0	1	1	1	1	1	0	2	1	-0.232	-0.5821	1	0.628563	0.470795
199	lcl|c213783_g1_i1|m.3203	417	0	0	0	0	0	0	0	0	0	0	0	1	0	1	0	0	1	1	-0.115	-0.2814	1	0.507509	0.744995
200	lcl|c213826_g1_i1|m.3216	334	0	0	0	0	0	0	0	0	0	1	0	0	0	0	0	0	0	0	-0.108	-0.2566	0.998986	0.491129	0.757399
201	lcl|c213837_g2_i3|m.3220	383	9	6	14	14	13	13	11	17	8	11	3	5	7	15	6	3	6	10	0.069	0.4609	0.172955	0.019322	0.779111
202	lcl|c213850_g3_i2|m.3229	370	2	4	5	1	1	1	2	3	4	4	2	3	1	1	1	1	2	4	-0.03	-0.1094	0.978381	0.373785	0.808385
203	lcl|c213850_g4_i1|m.3231	390	0	0	4	2	2	1	1	0	0	1	1	2	0	1	1	3	2	4	0.011	0.0358	0.884019	0.240746	0.828467
204	lcl|c213886_g7_i2|m.3271	1350	0	0	0	0	0	0	0	0	0	0	0	0	0	0	1	0	0	0	-0.17	-0.4245	1	0.581479	0.645339
205	lcl|c213886_g9_i1|m.3273	204	0	1	1	1	0	0	0	0	0	0	0	0	1	0	1	0	0	0	-0.091	-0.2244	0.997105	0.468287	0.771684
206	lcl|c213888_g2_i1|m.3274	225	0	0	0	0	0	0	0	0	0	0	0	0	1	0	0	0	0	0	-0.139	-0.3601	1	0.552393	0.696632
207	lcl|c213946_g11_i4|m.3301	543	1	0	2	3	1	0	1	2	0	0	4	2	0	1	5	5	2	3	-0.062	-0.1955	0.994618	0.446322	0.782898
208	lcl|c214032_g1_i4|m.3331	161	15	27	36	44	39	50	42	58	30	36	34	63	44	62	45	50	54	64	0.207	2.8596	0	0	0.611995
209	lcl|c214067_g1_i1|m.3351	120	0	1	0	1	0	2	1	1	0	2	0	1	1	1	1	0	0	0	0.044	0.1028	0.79751	0.183451	0.829298
210	lcl|c214108_g4_i4|m.3369	159	8	10	18	19	12	14	11	15	12	15	16	4	9	12	15	14	13	13	-0.081	-0.647	0.977295	0.640082	0.383797
211	lcl|c214118_g1_i2|m.3372	151	14	16	23	19	19	15	3	2	12	17	21	15	21	18	23	20	11	14	-0.167	-1.5045	0.003161	0.628741	0.000232
212	lcl|c214162_g1_i3|m.3378	122	0	0	0	0	0	1	0	0	0	0	0	2	0	0	0	0	0	0	-0.025	-0.0625	0.959776	0.331122	0.817811
213	lcl|c214164_g1_i8|m.3381	700	3	2	1	3	2	4	2	3	2	4	2	1	0	5	2	1	2	4	0.3	1.0799	0.000276	1.6e-05	0.68808
214	lcl|c214211_g3_i3|m.3396	158	0	2	2	1	3	2	1	1	2	3	2	0	3	2	1	2	2	1	-0.217	-0.7067	0.926051	0.647244	0.303958
215	lcl|c214228_g4_i5|m.3407	833	0	3	3	4	0	3	0	2	0	1	1	2	0	2	2	3	1	3	0.456	1.4223	1e-06	0	0.660734
216	lcl|c214229_g1_i1|m.3410	367	0	0	2	0	4	0	0	0	0	0	0	0	2	0	3	0	4	0	-0.724	-2.0859	0	0.616285	0
217	lcl|c214242_g1_i2|m.3413	293	3	13	1	2	3	3	4	8	2	8	8	14	7	6	2	4	4	4	0.508	2.4647	0	0	0.619866
218	lcl|c214242_g1_i3|m.3415	187	2	6	0	0	2	1	3	2	2	4	5	8	3	3	1	1	3	2	0.135	0.5033	0.128298	0.013542	0.770956
219	lcl|c214261_g2_i4|m.3427	253	0	0	0	0	0	0	0	0	0	0	0	0	0	0	0	1	0	2	-0.067	-0.1651	0.99081	0.421821	0.793188
220	lcl|c214330_g10_i3|m.3454	316	0	1	0	0	0	0	1	0	1	0	0	0	0	0	0	1	0	0	-0.154	-0.3749	1	0.55966	0.685842
221	lcl|c214356_g7_i5|m.3463	498	1	3	2	3	2	2	2	6	2	5	2	5	1	2	1	1	1	4	0.585	1.9156	0	0	0.6346
222	lcl|c214397_g6_i4|m.3476	257	3	3	3	5	1	4	5	10	5	7	4	11	4	8	3	9	3	7	0.621	2.8217	0	0	0.612557
223	lcl|c214413_g8_i8|m.3488	123	0	0	0	0	0	0	0	0	0	0	0	0	0	0	0	0	0	0	-0.083	-0.1992	0.994988	0.449208	0.781543
224	lcl|c214418_g2_i7|m.3489	275	0	0	0	0	0	2	1	2	0	1	0	0	0	0	0	0	0	1	0.057	0.1484	0.722993	0.148477	0.827235
225	lcl|c214499_g2_i2|m.3512	173	0	3	1	2	1	1	0	2	0	1	1	1	0	1	0	1	3	1	0.039	0.1069	0.791309	0.180155	0.829194
226	lcl|c214530_g4_i1|m.3518	242	0	1	6	2	2	6	3	3	2	4	8	12	4	8	4	7	6	7	0.253	1.1853	5.9e-05	3e-06	0.678653
227	lcl|c214535_g1_i1|m.3520	242	0	0	0	0	0	0	0	0	0	0	0	0	0	0	0	0	0	0	-0.104	-0.2506	0.998779	0.487007	0.760212
228	lcl|c214539_g3_i1|m.3522	509	0	2	2	4	2	3	3	3	1	4	2	1	1	2	2	1	2	4	0.236	0.7675	0.012162	0.000969	0.725452
229	lcl|c214556_g2_i3|m.3526	228	0	1	1	2	0	3	0	1	0	1	1	0	1	1	1	3	1	2	0.274	0.7517	0.014315	0.001158	0.727816
230	lcl|c214559_g9_i1|m.3528	225	1	1	1	2	2	2	2	3	2	2	2	5	4	4	2	1	3	3	0.066	0.2178	0.592108	0.103185	0.820651
231	lcl|c214573_g3_i1|m.3534	278	5	3	8	5	4	7	6	8	1	6	10	15	5	10	11	8	8	9	0.132	0.8012	0.008514	0.000657	0.720577
232	lcl|c214584_g4_i1|m.3540	241	3	4	1	4	1	4	3	4	5	4	4	4	3	6	4	5	1	2	0.258	1.0142	0.000671	4.2e-05	0.694627
233	lcl|c214602_g8_i1|m.3549	114	0	0	0	1	0	1	0	1	0	0	0	0	0	1	0	1	0	1	-0.092	-0.2203	0.99682	0.465254	0.773365
234	lcl|c214652_g1_i3|m.3567	315	0	0	0	1	0	1	1	6	0	1	0	2	0	0	1	1	0	0	0.3	0.8329	0.006021	0.00045	0.716195
235	lcl|c214653_g2_i1|m.3571	359	1	2	1	1	1	1	1	2	1	1	1	1	0	1	1	1	1	1	0.024	0.0582	0.858375	0.220955	0.829289
236	lcl|c214656_g8_i1|m.3574	143	0	0	0	1	0	0	0	0	0	0	0	0	1	1	0	1	0	1	-0.091	-0.2189	0.996681	0.464211	0.773931
237	lcl|c214667_g2_i8|m.3577	491	0	0	0	0	0	2	1	2	0	1	0	4	0	1	0	1	0	0	0.237	0.6593	0.035177	0.003117	0.74262
238	lcl|c214691_g1_i1|m.3614	371	0	1	2	1	1	0	2	0	1	1	0	3	1	0	2	2	2	1	-0.121	-0.3302	1	0.536597	0.716726
239	lcl|c214714_g4_i1|m.3630	233	1	0	1	0	0	0	0	1	0	1	0	0	0	1	1	0	0	1	-0.149	-0.3693	1	0.556953	0.689993
240	lcl|c214720_g1_i1|m.3639	283	0	1	1	1	0	1	1	2	0	2	0	0	0	1	0	0	1	3	0.158	0.3926	0.265885	0.032936	0.792206
241	lcl|c214720_g2_i1|m.3640	316	0	0	1	0	0	1	0	0	0	0	0	1	0	1	1	1	0	1	-0.124	-0.2976	1	0.517627	0.736198
242	lcl|c214737_g6_i1|m.3641	332	0	0	0	0	0	0	0	0	0	0	0	1	0	1	0	1	0	0	-0.122	-0.3032	1	0.521018	0.733024
243	lcl|c214766_g5_i2|m.3659	129	1	1	1	0	0	0	1	1	0	0	0	0	0	0	1	1	1	0	-0.107	-0.2644	0.999481	0.496396	0.753634
244	lcl|c214775_g8_i5|m.3661	272	0	0	0	0	0	0	0	0	0	0	0	0	0	0	0	0	0	0	-0.142	-0.3386	1	0.541188	0.711305
245	lcl|c214806_g3_i2|m.3678	301	0	0	0	0	0	0	1	0	0	0	0	0	0	1	0	0	0	2	-0.043	-0.1035	0.976558	0.368504	0.809734
246	lcl|c214827_g5_i1|m.3692	229	0	1	0	2	0	0	0	0	0	0	0	3	0	1	0	0	0	0	0.143	0.3719	0.299039	0.038342	0.796083
247	lcl|c214830_g3_i4|m.3696	162	0	0	0	0	0	0	0	0	0	0	0	1	0	1	0	0	0	0	-0.107	-0.2569	0.999017	0.491333	0.757256
248	lcl|c214832_g3_i2|m.3697	335	11	19	17	14	17	14	14	15	19	15	19	20	24	29	17	30	25	28	0.031	0.3056	0.418232	0.060531	0.807837
249	lcl|c214891_g1_i1|m.3715	193	0	2	2	2	2	1	1	2	1	2	1	2	1	1	1	0	0	1	0.098	0.2777	0.472647	0.072347	0.812333
250	lcl|c214910_g1_i1|m.3728	219	0	0	0	0	0	1	0	0	0	0	0	0	0	0	0	0	0	0	-0.101	-0.2499	0.998729	0.486522	0.760536
251	lcl|c214915_g6_i2|m.3733	114	0	0	0	0	0	0	0	0	0	0	0	2	1	4	1	0	1	2	0.281	0.7063	0.022528	0.001905	0.734881
252	lcl|c214925_g1_i1|m.3737	205	0	0	1	1	1	2	1	2	0	1	3	0	1	1	1	2	3	2	-0.075	-0.2042	0.995485	0.453075	0.779674
253	lcl|c214971_g6_i7|m.3760	277	0	0	0	0	0	0	0	0	0	0	0	1	0	0	0	0	0	0	-0.121	-0.301	1	0.519693	0.734279
254	lcl|c214975_g3_i2|m.3761	224	0	2	1	2	1	3	3	2	2	1	0	1	1	0	1	1	0	0	-0.011	-0.0316	0.941946	0.302504	0.822445
255	lcl|c215093_g1_i2|m.3818	140	1	2	3	3	3	6	3	11	4	4	0	6	4	6	2	1	0	0	0.44	1.7816	0	0	0.639944
256	lcl|c215124_g2_i2|m.3835	338	0	0	1	0	2	2	1	1	1	1	0	0	0	0	0	0	0	1	-0.108	-0.2703	0.999825	0.500309	0.750705
257	lcl|c215183_g1_i1|m.3867	153	0	0	0	0	0	0	0	0	0	0	0	0	0	0	0	0	0	0	-0.12	-0.3	1	0.519087	0.734846
258	lcl|c215258_g3_i5|m.3905	197	1	1	0	0	0	1	1	1	1	1	0	2	1	1	1	0	0	1	0.002	0.0052	0.913795	0.268503	0.826409
259	lcl|c215260_g2_i4|m.3906	282	0	0	0	0	0	0	0	0	0	0	0	0	0	0	0	0	0	0	-0.123	-0.2997	1	0.518905	0.735016
260	lcl|c215279_g2_i6|m.3910	210	1	1	0	1	0	0	2	1	0	1	0	3	0	3	0	3	0	0	0.258	0.6854	0.027548	0.002378	0.73827
261	lcl|c215282_g4_i10|m.3912	146	1	0	0	1	1	1	0	1	1	1	1	1	0	0	2	0	0	0	-0.149	-0.3812	1	0.562646	0.681073
262	lcl|c215299_g2_i2|m.3927	127	0	0	0	0	0	0	0	0	0	1	0	0	0	0	0	0	0	0	-0.135	-0.3046	1	0.521857	0.73222
263	lcl|c215313_g3_i2|m.3930	518	0	0	0	0	0	0	0	1	0	0	0	0	0	0	0	0	1	1	-0.124	-0.3025	1	0.520597	0.733425
264	lcl|c215316_g1_i1|m.3942	437	7	6	10	13	9	16	17	12	5	10	14	19	8	15	8	15	16	18	0.189	1.3899	2e-06	0	0.662987
265	lcl|c215321_g8_i1|m.3945	569	0	0	0	0	0	1	0	0	0	0	0	0	0	0	0	0	0	0	-0.166	-0.4024	1	0.572229	0.664232
266	lcl|c215384_g1_i4|m.3995	162	0	0	1	1	0	1	0	1	0	1	0	0	1	0	0	0	0	0	-0.143	-0.3677	1	0.55617	0.691163
267	lcl|c215388_g4_i3|m.4003	294	0	0	0	1	0	1	0	1	0	1	0	1	0	1	1	0	0	0	-0.123	-0.3113	1	0.525825	0.728311
268	lcl|c215397_g1_i1|m.4004	143	1	0	2	2	1	2	3	3	0	2	3	4	2	3	3	2	2	3	0.095	0.3207	0.389595	0.054775	0.805275
269	lcl|c215423_g1_i1|m.4014	380	0	0	0	0	0	0	0	0	0	0	0	0	0	0	0	0	0	0	-0.147	-0.3499	1	0.547174	0.703738
270	lcl|c215430_g1_i6|m.4026	280	0	1	0	0	0	1	0	1	0	0	0	0	0	0	0	0	0	1	-0.088	-0.2122	0.996198	0.459179	0.776596
271	lcl|c215434_g3_i1|m.4032	501	0	0	0	0	0	0	0	1	0	0	0	1	0	0	0	0	0	0	-0.128	-0.3007	1	0.519511	0.73445
272	lcl|c215450_g1_i1|m.4033	1756	0	2	4	2	0	0	3	1	1	2	1	0	3	1	0	0	2	3	-0.317	-0.9228	0.510614	0.653131	0.089488
273	lcl|c215455_g1_i1|m.4036	173	2	3	10	7	8	10	4	5	10	3	5	13	9	7	10	4	7	8	-0.17	-0.9564	0.433861	0.652225	0.070282
274	lcl|c215456_g2_i2|m.4039	171	0	0	3	3	3	2	1	3	0	1	2	1	0	1	1	2	1	1	-0.045	-0.1268	0.983203	0.389169	0.804121
275	lcl|c215465_g1_i1|m.4044	322	35	35	46	41	40	49	41	44	44	49	30	37	28	35	31	32	34	38	-0.013	-0.1715	0.991767	0.427091	0.791144
276	lcl|c215492_g2_i9|m.4058	328	47	81	71	80	91	102	80	83	74	72	71	100	85	104	79	73	97	111	0.047	0.8834	0.003391	0.000242	0.709609
277	lcl|c215540_g1_i1|m.4079	129	0	0	0	0	1	0	2	1	0	0	0	1	0	0	1	1	0	1	-0.183	-0.4351	1	0.585658	0.635782
278	lcl|c215551_g6_i1|m.4083	138	0	4	1	1	0	3	2	2	0	3	1	3	1	3	0	2	0	2	0.546	1.5851	0	0	0.650265
279	lcl|c215553_g1_i10|m.4084	162	0	2	1	0	0	1	1	3	0	1	1	1	0	1	3	1	2	3	0.011	0.0292	0.89097	0.246672	0.828115
280	lcl|c215606_g3_i1|m.4107	123	0	3	3	3	4	2	4	3	3	5	2	2	2	3	2	2	5	8	0.081	0.3373	0.359052	0.04894	0.802372
281	lcl|c215611_g3_i1|m.4117	295	0	1	0	0	0	0	0	0	0	0	0	0	0	1	0	0	0	0	-0.104	-0.2542	0.998947	0.489488	0.758533
282	lcl|c215616_g6_i2|m.4120	315	8	10	14	13	11	9	14	16	10	13	10	3	9	11	21	17	19	21	-0.132	-0.9878	0.366055	0.65114	0.055416
283	lcl|c215622_g1_i2|m.4124	214	0	0	0	0	0	0	0	1	0	0	0	0	0	0	0	0	0	1	-0.124	-0.3036	1	0.521258	0.732795
284	lcl|c215632_g4_i4|m.4127	584	0	0	0	0	0	0	0	0	0	0	0	0	0	0	0	0	0	0	-0.152	-0.3689	1	0.556757	0.690286
285	lcl|c215636_g1_i1|m.4133	232	0	0	1	1	0	2	0	0	0	1	1	0	1	0	1	0	1	0	-0.055	-0.1356	0.985302	0.396828	0.801801
286	lcl|c215662_g1_i2|m.4137	304	0	3	0	0	0	0	0	3	0	0	0	1	0	0	0	1	0	0	0.164	0.4273	0.215423	0.025272	0.785587
287	lcl|c215676_g2_i1|m.4150	125	0	0	0	0	0	2	2	1	0	2	1	0	1	1	2	1	0	0	-0.072	-0.1878	0.993739	0.440246	0.785645
288	lcl|c215720_g4_i1|m.4168	328	0	0	1	0	0	0	0	3	0	0	0	0	1	0	0	0	0	2	0.078	0.2038	0.619609	0.1115	0.822275
289	lcl|c215761_g1_i1|m.4176	358	0	0	1	1	1	2	1	0	0	0	0	1	0	0	1	1	1	1	-0.022	-0.0562	0.956532	0.325303	0.818855
290	lcl|c215762_g1_i1|m.4180	267	0	0	0	0	0	0	0	0	0	0	0	0	0	0	0	0	0	1	-0.075	-0.186	0.993574	0.438813	0.786274
291	lcl|c215763_g2_i3|m.4184	532	2	5	5	11	5	9	5	9	5	10	7	27	8	14	7	8	10	9	0.548	3.4173	0	0	0.607186
292	lcl|c215763_g2_i6|m.4185	446	2	6	5	8	5	7	4	6	3	7	6	23	6	11	4	6	7	6	0.545	3.0233	0	0	0.610044
293	lcl|c215778_g6_i2|m.4198	739	0	0	0	0	0	1	0	0	0	0	1	1	0	0	0	0	0	0	-0.134	-0.3351	1	0.539289	0.713584
294	lcl|c215819_g3_i2|m.4218	242	0	0	1	1	0	1	2	1	0	2	0	0	0	0	1	0	0	1	-0.114	-0.29	1	0.512938	0.740395
295	lcl|c215822_g3_i9|m.4221	283	2	4	1	1	1	1	0	1	2	0	0	0	1	0	0	0	0	0	-0.071	-0.2036	0.995439	0.452613	0.779901
296	lcl|c215838_g2_i1|m.4235	383	0	0	1	1	0	1	0	1	0	0	1	1	1	1	1	1	1	1	-0.125	-0.3056	1	0.522454	0.731643
297	lcl|c215848_g2_i7|m.4237	145	2	1	1	1	1	1	2	2	3	1	1	1	1	1	1	1	1	1	-0.342	-0.9291	0.496031	0.652985	0.085611
298	lcl|c215881_g2_i2|m.4262	264	0	1	1	0	0	0	0	0	2	1	0	0	0	0	0	0	0	0	-0.181	-0.469	1	0.59795	0.603026
299	lcl|c215894_g1_i3|m.4266	158	0	0	0	0	1	0	1	0	0	0	0	2	0	0	0	0	1	1	0.01	0.0261	0.894111	0.249468	0.827933
300	lcl|c215924_g3_i1|m.4285	145	4	1	8	0	0	0	5	2	7	9	3	5	11	9	5	1	9	9	-0.424	-2.1564	0	0.615258	0
301	lcl|c215928_g3_i1|m.4293	221	0	0	0	0	0	0	0	0	0	0	0	0	0	0	0	0	1	1	-0.097	-0.2363	0.997832	0.476933	0.766633
302	lcl|c215933_g1_i1|m.4300	361	0	0	0	0	0	0	0	0	0	0	0	0	0	0	0	0	0	0	-0.158	-0.3886	1	0.566071	0.675335
303	lcl|c215957_g2_i1|m.4319	280	12	9	9	11	9	13	12	18	13	10	13	8	10	12	14	18	12	14	-0.019	-0.1295	0.983861	0.391528	0.803421
304	lcl|c215957_g2_i7|m.4321	345	8	18	7	12	8	10	12	14	13	11	14	5	10	9	12	16	6	9	0.037	0.2765	0.475038	0.07289	0.812519
305	lcl|c215963_g8_i2|m.4326	221	5	9	13	12	9	13	13	10	10	11	15	5	11	16	21	22	15	17	-0.07	-0.5477	1	0.620778	0.514405
306	lcl|c215996_g2_i2|m.4340	263	0	0	0	0	0	0	0	0	0	0	0	0	0	0	0	0	0	0	-0.083	-0.1966	0.994692	0.447182	0.782497
307	lcl|c216002_g1_i6|m.4347	115	0	0	0	0	0	0	0	0	0	0	0	0	0	0	0	0	1	0	-0.12	-0.2988	1	0.518359	0.735524
308	lcl|c216038_g5_i1|m.4365	301	3	3	7	6	4	6	4	7	5	4	0	8	4	5	5	5	8	9	0.146	0.7453	0.01528	0.001244	0.728787
309	lcl|c216057_g3_i1|m.4371	439	5	9	6	13	15	15	10	13	8	7	8	9	8	10	14	18	11	10	0.114	0.8111	0.00765	0.000584	0.719188
310	lcl|c216124_g1_i2|m.4405	114	16	11	15	10	14	18	16	13	24	15	17	29	15	26	17	17	15	18	-0.035	-0.3009	1	0.519632	0.734336
311	lcl|c216124_g1_i3|m.4406	123	17	12	15	12	15	15	13	13	20	16	17	24	14	21	17	17	14	16	-0.069	-0.6029	0.998491	0.632704	0.443336
312	lcl|c216129_g1_i2|m.4409	163	3	2	2	5	3	6	5	3	6	4	5	10	2	12	5	11	3	13	0.562	2.8084	0	0	0.612764
313	lcl|c216163_g1_i3|m.4416	494	1	2	2	1	2	2	1	1	1	1	1	3	1	2	3	2	2	1	-0.048	-0.1428	0.986864	0.403029	0.799819
314	lcl|c216188_g2_i2|m.4423	126	1	0	2	2	1	4	3	2	0	2	1	2	1	1	3	2	3	3	0.056	0.1746	0.67546	0.130193	0.825198
315	lcl|c216194_g2_i1|m.4425	398	1	5	3	7	6	6	6	7	2	5	3	5	3	4	1	9	5	4	0.397	1.8748	0	0	0.636089
316	lcl|c216201_g2_i1|m.4428	114	1	0	0	1	1	1	0	2	1	1	0	2	1	4	0	2	0	0	0.303	0.7855	0.010068	0.000788	0.722821
317	lcl|c216243_g3_i1|m.4453	454	1	2	2	1	2	2	2	2	0	2	1	0	0	1	1	1	1	0	-0.073	-0.205	0.99554	0.45369	0.779371
318	lcl|c216289_g7_i1|m.4487	250	0	2	2	4	4	6	3	6	2	3	5	2	3	6	5	5	4	5	0.174	0.725	0.01874	0.001556	0.731922
319	lcl|c216306_g1_i11|m.4517	105	0	0	0	0	0	0	0	0	0	0	0	0	1	0	1	0	0	1	-0.09	-0.2141	0.996333	0.460614	0.775848
320	lcl|c216377_g1_i3|m.4559	370	2	0	3	5	4	7	7	6	3	1	3	1	3	4	6	2	4	3	-0.244	-1.0436	0.259966	0.648813	0.035334
321	lcl|c216404_g2_i10|m.4571	204	0	0	0	1	0	0	0	0	0	0	0	0	0	0	0	0	0	1	-0.125	-0.2997	1	0.518905	0.735016
322	lcl|c216448_g1_i1|m.4592	246	4	8	7	4	6	6	5	5	5	7	5	6	5	8	5	4	7	10	0.063	0.3321	0.368504	0.050714	0.803291
323	lcl|c216467_g10_i1|m.4595	168	0	0	13	13	7	7	13	7	0	0	7	6	0	0	0	0	1	0	-0.246	-1.1085	0.164362	0.645744	0.020039
324	lcl|c216467_g8_i1|m.4596	129	2	3	0	0	0	3	0	0	3	3	2	1	2	3	3	2	1	0	0	-0.0011	0.919194	0.274291	0.825847
325	lcl|c216467_g8_i2|m.4597	196	2	1	4	6	2	3	5	5	1	1	1	2	1	1	1	1	0	0	0.011	0.0354	0.884446	0.241104	0.828447
326	lcl|c216498_g3_i3|m.4612	253	0	0	1	1	2	1	0	2	1	0	1	1	1	1	1	1	2	0	-0.202	-0.5543	1	0.622367	0.506238
327	lcl|c216500_g6_i5|m.4616	239	1	0	0	0	0	1	0	0	1	0	2	1	1	0	1	0	2	2	-0.157	-0.4049	1	0.573312	0.662164
328	lcl|c216527_g1_i2|m.4625	544	0	0	1	0	1	0	0	1	0	0	0	1	0	0	0	0	0	0	-0.139	-0.3473	1	0.545815	0.705507
329	lcl|c216539_g3_i3|m.4633	184	0	0	0	0	1	0	1	0	1	1	1	0	1	2	1	0	0	1	-0.042	-0.1118	0.979141	0.375925	0.807822
330	lcl|c216567_g2_i2|m.4643	438	0	1	2	1	5	4	2	2	3	1	2	6	3	4	2	3	1	3	0.093	0.3392	0.355613	0.048305	0.802034
331	lcl|c216571_g1_i1|m.4650	422	0	1	0	1	1	0	0	1	0	0	1	0	0	0	1	0	0	0	-0.146	-0.3764	1	0.560377	0.684717
332	lcl|c216621_g3_i1|m.4676	189	78	48	62	56	70	83	92	84	83	88	60	35	79	70	56	48	81	95	-0.197	-3.5699	0	0.607102	0
333	lcl|c216645_g1_i1|m.4691	348	1	3	3	1	2	1	3	1	4	1	1	4	1	2	6	1	3	1	-0.516	-1.6858	0.000294	0.623642	1.7e-05
334	lcl|c216647_g6_i3|m.4694	462	0	1	0	0	0	0	0	0	0	0	0	0	0	0	0	0	1	0	-0.105	-0.2432	0.998345	0.481838	0.763584
335	lcl|c216650_g2_i1|m.4697	668	3	6	4	6	5	9	6	9	3	7	3	3	4	4	3	4	3	6	0.317	1.5743	0	0	0.650912
336	lcl|c216655_g1_i1|m.4705	553	26	22	24	24	21	24	35	26	21	28	33	27	34	39	41	33	40	33	-0.168	-1.9005	1e-05	0.619285	0
337	lcl|c216702_g5_i1|m.4730	206	0	1	4	4	0	6	5	4	1	4	3	4	2	1	1	2	3	2	0.161	0.6274	0.046931	0.004297	0.748107
338	lcl|c216705_g1_i4|m.4732	513	2	1	3	4	3	5	2	4	4	3	0	0	1	2	1	0	0	1	0.035	0.1213	0.768657	0.168806	0.8287
339	lcl|c216784_g1_i1|m.4762	166	1	2	1	2	0	0	1	4	0	5	0	0	1	3	0	5	0	9	0.959	3.1074	0	0	0.609282
340	lcl|c216818_g1_i2|m.4792	499	1	1	0	1	1	0	1	1	1	1	1	1	1	0	2	1	1	0	-0.202	-0.4759	1	0.600259	0.595949
341	lcl|c216824_g6_i1|m.4796	413	0	1	0	1	0	0	0	1	0	1	1	0	1	0	1	0	0	1	-0.158	-0.379	1	0.561611	0.682751
342	lcl|c216848_g3_i4|m.4809	337	4	2	2	3	7	8	8	12	3	7	8	5	5	12	10	16	8	12	0.246	1.4124	1e-06	0	0.661417
343	lcl|c216861_g2_i3|m.4815	379	0	0	0	3	0	2	0	2	0	0	0	0	1	0	0	1	0	0	0.169	0.4207	0.224508	0.026603	0.786854
344	lcl|c216872_g3_i2|m.4822	168	0	1	0	0	0	1	0	0	0	0	0	1	0	2	0	0	0	0	-0.008	-0.0183	0.932689	0.290174	0.82407
345	lcl|c216916_g1_i2|m.4843	162	0	0	0	0	0	1	1	1	0	1	0	1	0	1	1	1	0	0	-0.104	-0.2543	0.99895	0.489556	0.758486
346	lcl|c216942_g4_i3|m.4860	274	5	5	12	11	7	14	12	14	9	11	16	15	5	18	10	11	13	12	0.143	1.0304	0.000542	3.4e-05	0.692958
347	lcl|c216953_g1_i3|m.4865	235	0	0	1	1	1	4	1	2	2	1	1	3	2	3	1	2	2	3	0.327	0.9625	0.001304	8.6e-05	0.700214
348	lcl|c216995_g9_i1|m.4890	143	0	1	0	1	0	1	1	1	0	0	1	0	0	1	1	1	1	1	-0.142	-0.3479	1	0.54613	0.705101
349	lcl|c217005_g3_i1|m.4893	516	1	1	2	2	4	2	2	0	4	0	4	0	2	2	2	4	3	2	-0.467	-1.4924	0.003659	0.629142	0.000273
350	lcl|c217013_g4_i3|m.4901	557	0	0	0	0	0	0	0	1	0	0	0	1	0	0	0	0	0	0	-0.147	-0.358	1	0.551333	0.698117
351	lcl|c217046_g2_i2|m.4921	339	0	3	1	2	0	3	3	3	0	0	2	1	2	1	3	1	3	1	-0.134	-0.4234	1	0.581036	0.646312
352	lcl|c217062_g3_i1|m.4934	311	1	2	2	2	2	3	2	1	2	2	2	1	2	2	2	1	2	2	-0.134	-0.4009	1	0.571574	0.665465
353	lcl|c217096_g5_i1|m.4965	114	1	0	1	1	1	1	2	1	3	0	0	2	1	1	1	1	1	1	-0.242	-0.6132	0.994612	0.634597	0.429533
354	lcl|c217098_g2_i2|m.4966	169	1	0	0	0	1	2	0	0	1	2	1	0	2	3	2	1	2	3	0.097	0.2791	0.469867	0.071716	0.812115
355	lcl|c217146_g1_i1|m.4997	510	2	2	0	0	0	0	0	0	1	1	0	0	0	1	0	2	1	0	-0.046	-0.1192	0.981209	0.382486	0.806036
356	lcl|c217182_g4_i2|m.5020	118	0	0	0	1	0	0	0	0	0	0	0	0	0	0	0	0	0	0	-0.09	-0.2199	0.996783	0.464956	0.773527
357	lcl|c217182_g4_i3|m.5021	215	0	0	0	1	0	0	0	1	0	1	0	0	0	0	0	0	0	0	-0.085	-0.21	0.995992	0.457511	0.777454
358	lcl|c217195_g5_i2|m.5022	138	13	18	25	29	20	21	13	12	16	19	24	5	21	26	31	30	27	27	-0.116	-1.1349	0.13406	0.644449	0.015701
359	lcl|c217199_g3_i2|m.5026	225	0	2	4	3	6	2	2	2	2	3	3	4	2	5	3	4	0	4	0.075	0.2855	0.457275	0.068886	0.81111
360	lcl|c217202_g3_i1|m.5028	315	0	0	0	0	0	1	0	0	0	0	0	0	0	0	0	0	0	0	-0.11	-0.2604	0.999311	0.493708	0.755581
361	lcl|c217203_g1_i3|m.5031	482	0	1	1	0	1	0	1	0	1	0	1	0	1	0	1	0	1	0	-0.125	-0.3122	1	0.526352	0.727778
362	lcl|c217263_g3_i1|m.5056	281	0	1	0	0	0	0	0	0	0	0	0	0	0	1	0	0	0	0	-0.141	-0.3507	1	0.54759	0.703191
363	lcl|c217312_g3_i1|m.5102	175	0	1	0	0	0	0	1	0	1	0	0	0	0	0	0	0	0	1	-0.055	-0.1367	0.985525	0.397779	0.801503
364	lcl|c217326_g3_i1|m.5105	483	0	2	1	2	1	2	1	0	3	1	1	1	1	0	1	2	1	2	0.086	0.2362	0.555483	0.092897	0.818319
365	lcl|c217341_g1_i2|m.5116	153	4	6	7	10	9	10	7	8	7	7	8	8	6	9	7	10	10	14	0.143	0.8219	0.006798	0.000514	0.717693
366	lcl|c217363_g1_i9|m.5153	192	0	0	0	0	0	0	0	1	0	0	0	0	0	0	0	0	0	0	-0.1	-0.249	0.998657	0.485897	0.76095
367	lcl|c217381_g1_i2|m.5165	439	0	0	0	0	0	0	0	0	0	0	0	0	0	0	0	0	0	0	-0.146	-0.342	1	0.543012	0.709061
368	lcl|c217427_g4_i1|m.5185	235	3	7	5	6	5	5	4	5	7	8	8	0	6	3	4	4	3	7	-0.088	-0.4408	1	0.587838	0.630508
369	lcl|c217447_g9_i5|m.5205	1674	35	64	70	89	55	83	78	106	45	83	50	56	54	77	46	72	64	98	0.278	4.8317	0	0	0.602425
370	lcl|c217451_g8_i1|m.5211	258	0	0	0	0	0	0	1	0	0	0	0	0	0	0	0	0	0	0	-0.099	-0.2388	0.998045	0.47872	0.765539
371	lcl|c217466_g1_i3|m.5215	389	54	36	27	67	101	120	113	118	72	90	91	50	95	125	121	132	118	157	0.02	0.3987	0.256536	0.031466	0.791052
372	lcl|c217500_g3_i1|m.5226	284	0	1	1	1	1	1	1	1	2	2	0	0	0	0	0	0	0	0	-0.112	-0.2847	1	0.509608	0.743248
373	lcl|c217525_g1_i1|m.5229	476	0	0	1	0	0	0	0	0	0	0	0	1	0	0	0	0	0	0	-0.127	-0.3229	1	0.53251	0.7213
374	lcl|c217534_g1_i2|m.5231	210	4	4	5	3	5	3	3	3	4	4	5	2	3	3	5	1	4	2	-0.487	-1.9378	5e-06	0.618642	0
375	lcl|c217573_g1_i1|m.5252	230	5	14	8	11	9	14	14	17	11	12	8	11	4	16	8	5	8	13	0.291	2.032	0	0	0.630888
376	lcl|c217576_g1_i1|m.5259	572	0	0	0	0	0	1	1	5	0	0	0	1	0	0	0	0	0	0	0.185	0.4977	0.133637	0.014208	0.772028
377	lcl|c217585_g1_i2|m.5268	241	0	0	0	0	0	0	1	0	0	1	0	0	0	0	0	0	1	0	-0.078	-0.2012	0.995219	0.45076	0.780801
378	lcl|c217591_g3_i7|m.5275	177	0	0	0	0	0	0	0	0	0	0	1	0	0	0	1	0	1	0	-0.129	-0.3079	1	0.523821	0.730308
379	lcl|c217621_g3_i1|m.5289	392	0	1	0	0	0	0	1	3	1	2	1	2	0	1	0	0	0	2	0.242	0.6131	0.053202	0.004945	0.750625
380	lcl|c217621_g5_i1|m.5291	200	0	1	0	0	0	0	0	2	0	0	0	0	0	1	0	0	0	0	-0.023	-0.0574	0.957156	0.326413	0.81866
381	lcl|c217626_g1_i4|m.5292	302	1	1	0	1	1	0	0	1	0	2	1	0	0	1	0	1	1	0	-0.062	-0.1493	0.988093	0.408573	0.797963
382	lcl|c217645_g1_i1|m.5302	248	0	0	1	1	1	1	1	2	0	1	1	1	0	2	0	1	1	1	0.037	0.0932	0.811675	0.191275	0.829472
383	lcl|c217654_g5_i4|m.5303	143	2	7	6	6	8	7	9	6	5	7	8	8	8	6	8	6	7	6	-0.122	-0.6595	0.968969	0.641839	0.366857
384	lcl|c217655_g1_i10|m.5304	196	0	0	2	2	0	2	1	2	1	0	0	0	0	0	0	0	1	0	0.048	0.1226	0.766546	0.1678	0.828646
385	lcl|c217670_g3_i2|m.5308	236	0	0	1	0	0	0	0	1	0	3	0	1	1	1	0	1	0	1	0.046	0.1147	0.779177	0.173963	0.828952
386	lcl|c217684_g1_i2|m.5317	187	0	0	0	1	0	1	1	1	0	0	1	1	0	1	1	1	0	1	-0.114	-0.2643	0.999479	0.496329	0.753683
387	lcl|c217701_g4_i1|m.5329	333	0	1	1	1	0	1	1	0	0	0	1	2	0	1	3	2	0	1	-0.076	-0.2055	0.99557	0.454074	0.779181
388	lcl|c217724_g1_i1|m.5344	242	0	0	0	0	0	0	0	0	0	0	0	1	1	0	0	0	0	0	-0.143	-0.3497	1	0.54707	0.703875
389	lcl|c217737_g4_i4|m.5348	224	1	3	9	9	2	3	0	2	4	5	6	3	3	4	6	5	3	2	-0.049	-0.2084	0.995809	0.456292	0.778072
390	lcl|c217776_g2_i5|m.5358	259	1	0	1	1	0	1	1	1	0	1	0	1	1	1	2	1	0	1	-0.208	-0.5374	1	0.618205	0.526942
391	lcl|c217777_g4_i6|m.5361	307	0	0	0	0	0	0	0	1	0	2	0	0	0	0	0	0	0	0	-0.031	-0.0745	0.965435	0.342164	0.815678
392	lcl|c217792_g3_i1|m.5367	165	2	2	0	1	0	2	4	2	1	3	0	2	1	1	2	1	2	1	-0.097	-0.2925	1	0.514492	0.739028
393	lcl|c217792_g3_i5|m.5368	125	0	0	0	0	0	0	0	1	0	2	1	1	0	0	0	1	0	1	-0.069	-0.1725	0.991912	0.427909	0.790819
394	lcl|c217808_g1_i5|m.5370	223	62	62	60	63	65	74	62	73	68	68	66	68	62	67	66	67	64	69	-0.035	-0.6316	0.986184	0.637719	0.404684
395	lcl|c217816_g7_i5|m.5372	356	0	0	0	0	0	0	0	0	0	0	0	2	0	0	0	0	0	0	-0.046	-0.1147	0.979991	0.378503	0.807131
396	lcl|c217853_g6_i3|m.5408	319	1	0	0	0	0	0	0	0	0	0	0	0	0	2	0	0	0	0	-0.037	-0.0916	0.972394	0.357766	0.812311
397	lcl|c217854_g5_i1|m.5413	250	2	0	3	1	2	3	3	5	1	3	1	0	0	1	2	1	2	1	-0.157	-0.483	1	0.60257	0.588522
398	lcl|c217887_g8_i2|m.5422	214	1	1	4	1	2	1	2	2	1	1	3	3	1	4	2	1	1	1	-0.18	-0.5634	1	0.624482	0.494815
399	lcl|c217937_g2_i4|m.5443	512	1	0	0	0	0	0	0	0	0	0	0	0	0	0	0	0	0	0	-0.14	-0.3311	1	0.537095	0.716153
400	lcl|c217972_g1_i6|m.5456	109	0	1	0	1	0	2	0	0	1	4	3	4	3	6	3	4	2	2	0.347	1.1221	0.000151	9e-06	0.684162
401	lcl|c217988_g6_i3|m.5463	346	12	15	13	31	19	30	19	29	18	25	14	12	16	22	17	24	14	23	0.279	2.6422	0	0	0.615828
402	lcl|c217990_g1_i1|m.5468	127	0	0	0	0	0	0	0	0	0	0	0	1	0	0	0	0	0	0	-0.125	-0.3029	1	0.520838	0.733196
403	lcl|c218000_g1_i5|m.5473	256	0	1	1	1	1	1	0	0	0	1	0	0	0	0	0	0	0	0	-0.112	-0.2788	1	0.505842	0.746356
404	lcl|c218016_g3_i3|m.5485	300	0	1	0	0	0	1	1	2	0	0	0	0	0	0	0	0	0	0	-0.068	-0.1689	0.991342	0.424957	0.791982
405	lcl|c218032_g1_i1|m.5496	550	1	1	0	2	2	3	2	2	3	1	3	0	1	4	1	0	4	5	-0.041	-0.1335	0.984846	0.395008	0.802365
406	lcl|c218055_g3_i2|m.5518	365	0	0	0	1	0	1	0	0	0	1	0	0	0	0	0	0	0	0	-0.14	-0.3417	1	0.542851	0.70926
407	lcl|c218119_g1_i3|m.5570	280	1	0	1	3	0	1	1	1	1	2	0	0	2	1	2	1	2	2	-0.055	-0.1596	0.989918	0.417247	0.794893
408	lcl|c218123_g3_i2|m.5572	229	5	8	6	4	3	5	6	4	6	6	6	8	7	6	7	6	3	5	-0.021	-0.1128	0.979442	0.376814	0.807585
409	lcl|c218175_g5_i2|m.5596	147	0	0	1	1	0	0	1	2	0	1	0	2	0	0	0	0	1	1	0.038	0.0942	0.810226	0.190453	0.829458
410	lcl|c218183_g4_i3|m.5602	449	2	1	1	1	1	1	2	0	2	0	1	1	2	0	2	0	2	1	-0.549	-1.5081	0.003026	0.628624	0.000221
411	lcl|c218185_g1_i2|m.5605	290	0	0	0	2	0	0	1	3	0	0	0	2	0	0	0	0	0	1	0.147	0.4016	0.252164	0.030786	0.790501
412	lcl|c218185_g1_i3|m.5606	286	0	0	3	3	0	0	2	3	0	0	1	3	0	0	1	0	0	2	0.146	0.4286	0.21366	0.025016	0.785337
413	lcl|c218196_g3_i9|m.5616	396	0	2	0	2	1	1	2	3	0	1	0	2	0	1	1	0	1	2	0.241	0.6667	0.032847	0.002889	0.741373
414	lcl|c218197_g1_i1|m.5617	286	1	0	0	0	0	0	0	0	0	1	0	0	0	0	0	0	0	0	-0.124	-0.3047	1	0.521917	0.732162
415	lcl|c218214_g1_i2|m.5634	619	0	0	0	0	0	0	0	0	0	0	0	2	0	1	0	0	1	1	-0.04	-0.0993	0.975109	0.364727	0.810666
416	lcl|c218223_g3_i1|m.5642	343	0	3	0	0	1	0	1	0	3	0	1	0	1	1	1	2	0	1	-0.038	-0.1018	0.97599	0.366977	0.810114
417	lcl|c218298_g7_i1|m.5703	314	0	0	0	0	0	1	0	0	0	0	0	0	0	0	0	0	0	1	-0.129	-0.3096	1	0.524825	0.729313
418	lcl|c218302_g5_i1|m.5709	298	11	3	14	8	14	12	8	10	18	13	7	21	12	11	9	7	9	6	-0.199	-1.4155	0.008954	0.631877	0.000734
419	lcl|c218345_g3_i2|m.5731	156	0	0	0	0	0	0	0	0	0	0	0	3	0	0	0	0	0	0	0.076	0.1872	0.651714	0.121906	0.824017
420	lcl|c218374_g1_i3|m.5753	544	4	7	3	4	3	7	6	8	4	8	2	7	4	5	4	3	4	6	0.335	1.59	0	0	0.649974
421	lcl|c218374_g4_i1|m.5754	223	15	8	11	13	12	19	12	13	10	16	12	18	11	12	12	14	13	17	0.113	0.8952	0.002953	0.000208	0.708138
422	lcl|c218375_g1_i1|m.5756	193	6	9	10	14	10	15	9	15	4	9	5	8	6	12	8	10	8	11	0.314	1.9744	0	0	0.632637
423	lcl|c218378_g1_i4|m.5757	803	0	0	0	0	0	1	0	2	0	0	0	0	0	0	0	0	0	0	-0.076	-0.2009	0.995187	0.450527	0.780912
424	lcl|c218388_g2_i3|m.5763	428	0	3	3	3	0	0	0	2	1	2	1	0	0	0	0	0	0	0	0.127	0.3501	0.336222	0.044781	0.800079
425	lcl|c218413_g4_i1|m.5770	116	0	0	1	0	0	0	0	1	0	0	0	0	0	0	1	0	0	0	-0.13	-0.3144	1	0.527634	0.726467
426	lcl|c218445_g1_i1|m.5788	973	1	3	0	0	0	0	1	1	0	2	0	0	1	1	0	1	1	1	0.082	0.2138	0.59998	0.105517	0.821129
427	lcl|c218449_g2_i1|m.5791	244	1	2	0	0	0	0	0	0	0	0	0	0	1	2	0	0	0	0	0.057	0.1499	0.72033	0.147393	0.827134
428	lcl|c218481_g4_i6|m.5811	142	5	4	6	8	7	8	6	7	4	6	2	7	5	9	4	8	4	9	0.301	1.5966	0	0	0.649584
429	lcl|c218494_g2_i5|m.5814	274	0	0	1	0	0	0	0	0	0	1	0	1	0	1	0	0	0	1	-0.124	-0.3118	1	0.526118	0.728015
430	lcl|c218495_g1_i2|m.5815	121	7	2	3	2	6	3	8	4	9	2	9	3	7	6	10	3	9	6	-0.817	-3.9466	0	0.605661	0
431	lcl|c218576_g4_i1|m.5836	181	0	0	0	1	0	2	0	1	0	0	0	3	0	0	0	0	1	0	0.131	0.3172	0.396178	0.05607	0.805876
432	lcl|c218580_g2_i1|m.5839	166	2	1	3	5	4	3	2	4	2	2	1	2	2	5	2	2	2	5	0.245	0.8959	0.002929	0.000206	0.708052
433	lcl|c218603_g6_i5|m.5857	452	1	1	3	2	2	3	1	1	1	0	5	0	1	1	1	1	2	2	-0.317	-0.9343	0.483992	0.652855	0.082509
434	lcl|c218647_g3_i1|m.5884	357	0	2	3	5	1	3	3	3	3	3	6	4	5	6	4	4	2	7	0.187	0.7877	0.009836	0.000769	0.722503
435	lcl|c218666_g4_i1|m.5893	287	0	1	0	0	0	0	0	0	0	0	0	0	0	0	0	0	0	0	-0.091	-0.2289	0.997404	0.471585	0.769805
436	lcl|c218696_g8_i2|m.5906	146	23	20	20	17	16	20	0	0	32	23	0	0	24	34	17	13	4	4	-0.17	-1.4065	0.009903	0.632219	0.00082
437	lcl|c218703_g1_i4|m.5907	130	4	3	3	7	7	6	8	5	4	4	7	7	4	6	6	5	7	8	-0.067	-0.3417	1	0.542851	0.70926
438	lcl|c218706_g7_i3|m.5908	289	1	2	1	2	0	1	3	2	0	1	0	2	0	0	1	1	0	0	-0.003	-0.0074	0.924341	0.280097	0.825238
439	lcl|c218722_g1_i2|m.5914	267	4	7	6	7	6	6	11	9	8	7	4	6	6	9	6	3	4	10	0.032	0.1798	0.665719	0.126733	0.824726
440	lcl|c218730_g2_i11|m.5922	225	0	0	35	55	25	28	6	5	0	0	0	0	0	0	7	5	5	5	0.097	0.6672	0.032695	0.002874	0.741289
441	lcl|c218748_g1_i1|m.5931	114	2	5	3	7	4	6	4	7	2	4	6	3	4	5	7	9	6	8	0.247	1.2704	1.5e-05	1e-06	0.671794
442	lcl|c218755_g2_i2|m.5948	292	2	2	3	0	2	1	5	1	4	2	3	4	2	1	3	0	2	1	-0.632	-2.1087	0	0.615946	0
443	lcl|c218820_g4_i2|m.5974	322	4	1	2	3	2	5	6	3	3	5	1	5	0	3	2	1	1	4	0.156	0.594	0.062667	0.005945	0.754042
444	lcl|c218842_g3_i2|m.5986	369	6	11	11	15	10	17	9	13	7	13	8	9	8	15	9	11	11	14	0.28	1.9506	0	0	0.633407
445	lcl|c218842_g3_i2|m.5987	117	2	2	4	6	6	4	3	3	4	3	8	9	7	8	11	10	10	10	-0.064	-0.3435	1	0.54381	0.708062
446	lcl|c218852_g5_i3|m.5993	240	0	4	2	4	3	5	3	3	3	5	6	6	3	3	8	4	5	5	0.061	0.2592	0.509443	0.081059	0.815116
447	lcl|c218872_g2_i3|m.6012	254	7	9	9	12	7	7	11	11	7	11	6	10	9	10	6	8	12	14	0.115	0.7632	0.012717	0.001018	0.726091
448	lcl|c218873_g3_i3|m.6014	160	0	0	0	0	0	0	0	0	0	0	0	1	1	0	2	0	0	2	-0.102	-0.2477	0.998538	0.484992	0.761546
449	lcl|c218881_g3_i2|m.6022	212	0	0	0	0	0	0	2	0	0	0	0	2	0	0	0	0	0	0	-0.103	-0.273	0.999953	0.502081	0.749339
450	lcl|c218902_g1_i3|m.6053	198	0	0	0	0	1	0	1	1	0	0	0	0	0	0	0	0	0	0	-0.105	-0.2523	0.998876	0.488181	0.759422
451	lcl|c218903_g1_i1|m.6054	394	0	0	1	2	1	5	0	2	1	2	1	4	0	3	0	0	1	1	0.562	1.7089	0	0	0.643422
452	lcl|c218968_g13_i5|m.6107	382	0	0	2	0	1	0	1	0	0	0	1	0	0	1	1	0	0	0	-0.175	-0.42	1	0.579655	0.649299
453	lcl|c218972_g2_i1|m.6108	238	0	1	0	1	0	1	0	1	0	0	0	1	0	1	0	0	0	1	-0.116	-0.2889	1	0.512251	0.740992
454	lcl|c219090_g4_i2|m.6185	192	0	2	2	2	3	3	1	1	1	0	1	0	1	1	2	2	2	0	-0.077	-0.2136	0.996301	0.460237	0.776045
455	lcl|c219160_g4_i1|m.6235	367	0	0	1	1	0	1	0	1	0	1	0	0	0	0	1	0	0	0	-0.134	-0.3317	1	0.537426	0.71577
456	lcl|c219163_g1_i3|m.6242	210	0	1	1	1	0	1	2	2	0	1	1	0	2	2	1	2	2	3	0.053	0.1547	0.711803	0.143954	0.826799
457	lcl|c219184_g1_i2|m.6256	101	0	0	0	0	0	0	0	0	0	0	0	7	0	0	0	0	0	0	0.343	0.9932	0.000882	5.7e-05	0.696847
458	lcl|c219184_g2_i2|m.6257	146	1	1	1	2	1	1	1	0	1	2	1	0	0	0	1	0	0	0	0.071	0.1786	0.667995	0.127526	0.824837
459	lcl|c219187_g1_i1|m.6258	377	1	0	1	0	0	1	1	0	0	0	0	0	0	0	0	0	0	0	-0.125	-0.3045	1	0.521797	0.732277
460	lcl|c219220_g4_i4|m.6283	542	1	1	0	3	1	1	1	3	0	0	1	0	0	0	1	1	0	1	0.163	0.4294	0.212581	0.02486	0.785184
461	lcl|c219225_g1_i5|m.6286	145	0	0	0	1	0	1	0	0	0	0	0	0	0	0	0	0	0	0	-0.11	-0.268	0.999652	0.498791	0.751855
462	lcl|c219237_g2_i4|m.6297	449	0	1	0	2	1	2	1	4	1	1	0	1	0	1	0	1	0	0	0.246	0.6865	0.027261	0.002351	0.738089
463	lcl|c219258_g1_i1|m.6308	253	0	0	0	0	0	0	0	0	0	0	0	0	0	0	0	0	0	0	-0.107	-0.26	0.999285	0.493438	0.755774
464	lcl|c219274_g1_i6|m.6313	198	1	0	0	0	1	1	1	1	0	0	0	0	1	2	1	1	1	1	-0.047	-0.1185	0.980998	0.381868	0.806208
465	lcl|c219327_g1_i2|m.6330	217	2	3	2	2	3	2	3	2	2	3	4	2	3	2	2	2	3	3	-0.203	-0.7152	0.916287	0.648023	0.292953
466	lcl|c219327_g5_i1|m.6332	121	0	0	0	0	0	0	0	2	0	0	0	0	0	0	0	0	0	0	-0.027	-0.0661	0.961539	0.334441	0.817191
467	lcl|c219457_g2_i7|m.6385	322	0	0	0	1	0	0	0	0	0	0	0	1	1	0	0	0	1	0	-0.154	-0.3673	1	0.555973	0.691455
468	lcl|c219462_g5_i7|m.6389	243	2	2	5	2	4	3	3	6	2	5	3	2	1	5	3	5	1	5	0.247	1.0005	0.000803	5.1e-05	0.696068
469	lcl|c219473_g3_i1|m.6396	959	0	0	0	0	0	1	1	1	0	0	0	0	0	0	0	1	1	0	-0.085	-0.1987	0.994924	0.448819	0.781727
470	lcl|c219485_g5_i3|m.6399	204	0	0	2	1	1	2	0	1	0	1	2	1	1	0	0	1	2	2	-0.201	-0.5499	1	0.621313	0.511694
471	lcl|c219495_g3_i10|m.6406	371	0	1	1	0	0	1	1	0	1	1	4	1	1	0	2	0	2	0	-0.436	-1.1329	0.136186	0.644547	0.015998
472	lcl|c219506_g5_i1|m.6423	245	9	10	8	14	11	15	20	15	15	12	14	11	14	17	13	13	17	12	-0.115	-0.8952	0.575188	0.653628	0.108048
473	lcl|c219546_g2_i1|m.6439	265	20	25	24	33	25	40	33	39	20	31	26	25	23	36	31	31	30	39	0.152	1.7279	0	0	0.642473
474	lcl|c219556_g4_i5|m.6447	320	0	4	3	5	1	4	4	9	4	3	2	6	2	4	0	1	5	5	0.417	1.6726	0	0	0.645313
475	lcl|c219560_g3_i6|m.6452	532	0	0	1	0	0	1	1	2	1	0	2	0	0	1	1	0	0	1	-0.115	-0.2739	0.999978	0.502668	0.748881
476	lcl|c219563_g5_i1|m.6455	161	2	2	2	4	2	3	2	2	3	3	2	3	2	2	2	1	2	2	0.02	0.0698	0.843792	0.210933	0.829496
477	lcl|c219564_g8_i2|m.6456	156	0	0	1	2	0	3	2	2	1	1	3	0	2	3	0	2	4	5	0.114	0.366	0.308894	0.040007	0.797175
478	lcl|c219583_g2_i1|m.6468	249	3	7	5	4	3	4	4	3	5	6	2	5	2	2	1	2	2	3	0.157	0.6204	0.049918	0.004604	0.749335
479	lcl|c219601_g1_i1|m.6471	429	23	24	22	29	24	39	24	29	26	36	38	29	31	34	34	35	22	29	0.058	0.672	0.031262	0.002735	0.740487
480	lcl|c219632_g2_i1|m.6493	441	0	1	1	2	1	2	1	0	0	1	0	0	2	1	0	1	0	1	-0.039	-0.1022	0.976126	0.367337	0.810025
481	lcl|c219636_g2_i1|m.6494	168	1	1	3	2	1	2	1	1	2	3	2	1	1	1	1	1	1	2	-0.085	-0.2372	0.997883	0.477577	0.766241
482	lcl|c219636_g2_i3|m.6495	144	3	1	2	2	1	3	3	1	2	3	2	6	6	8	3	4	5	3	0.046	0.1852	0.655493	0.123199	0.824212
483	lcl|c219662_g1_i2|m.6507	250	28	52	35	40	34	51	38	52	36	49	37	30	39	45	35	36	33	40	0.118	1.6006	0	0	0.64935
484	lcl|c219674_g1_i1|m.6511	118	0	0	0	0	0	1	0	0	0	0	0	1	0	0	1	1	0	1	-0.135	-0.3202	1	0.530975	0.72296
485	lcl|c219703_g2_i4|m.6532	149	0	0	0	1	0	0	0	1	0	0	0	1	0	0	0	0	0	0	-0.127	-0.3053	1	0.522275	0.731816
486	lcl|c219704_g3_i2|m.6534	624	0	0	0	0	0	0	1	0	1	0	0	1	0	0	0	0	0	0	-0.135	-0.3299	1	0.536431	0.716917
487	lcl|c219710_g2_i1|m.6538	329	8	11	17	21	11	14	16	13	8	16	11	1	9	6	8	7	14	17	-0.073	-0.539	1	0.618612	0.525011
488	lcl|c219726_g2_i5|m.6542	332	0	0	0	0	0	0	0	0	0	0	0	0	0	0	0	0	0	0	-0.118	-0.2995	1	0.518784	0.735129
489	lcl|c219733_g1_i1|m.6543	217	0	1	1	1	0	2	2	0	0	0	0	0	0	1	0	1	0	0	-0.167	-0.4446	1	0.589265	0.62694
490	lcl|c219733_g1_i5|m.6547	208	0	1	2	2	2	4	2	0	0	1	0	0	0	2	0	1	0	0	-0.019	-0.0538	0.955251	0.323083	0.819239
491	lcl|c219759_g3_i3|m.6556	148	2	2	3	7	1	6	1	4	2	5	2	3	1	7	3	4	3	4	0.661	2.4187	0	0	0.620981
492	lcl|c219761_g2_i10|m.6558	191	0	0	0	1	0	0	0	0	0	1	0	0	0	0	0	0	0	0	-0.084	-0.2018	0.99528	0.451224	0.780577
493	lcl|c219763_g5_i3|m.6564	216	2	2	2	1	1	1	1	1	2	0	0	0	1	0	0	0	0	0	-0.246	-0.6303	0.986812	0.637509	0.406445
494	lcl|c219817_g1_i3|m.6593	509	1	0	0	0	0	0	0	0	1	0	0	1	0	0	0	1	0	0	-0.139	-0.3269	1	0.534761	0.718809
495	lcl|c219828_g4_i5|m.6597	249	0	0	0	0	0	0	0	0	0	0	0	0	0	0	0	0	0	0	-0.147	-0.3733	1	0.558892	0.687036
496	lcl|c219829_g2_i1|m.6600	268	0	0	0	1	0	0	0	1	0	0	0	3	0	0	0	0	1	1	0.024	0.0614	0.854427	0.218174	0.829361
497	lcl|c219842_g1_i1|m.6611	344	1	2	2	7	3	7	2	6	1	8	2	1	2	4	1	3	1	2	0.711	2.4742	0	0	0.619637
498	lcl|c219870_g5_i1|m.6620	116	6	1	3	4	3	7	2	5	6	6	2	8	5	5	4	3	3	3	0.107	0.5231	0.110696	0.011397	0.767185
499	lcl|c219883_g1_i2|m.6624	445	48	54	50	63	59	83	57	77	50	76	56	46	50	67	65	72	61	76	0.109	1.7761	0	0	0.640193
500	lcl|c219885_g1_i1|m.6625	348	0	0	0	0	1	0	1	0	0	0	0	0	0	0	1	1	1	0	-0.113	-0.2653	0.999495	0.496996	0.753192
501	lcl|c219901_g4_i1|m.6631	347	0	1	2	1	0	0	0	0	0	1	1	1	1	1	0	1	1	1	-0.188	-0.4638	1	0.596167	0.608267
502	lcl|c219950_g4_i1|m.6653	411	0	2	0	0	1	2	2	1	1	1	0	1	0	1	0	0	1	0	-0.034	-0.0927	0.972808	0.358763	0.812081
503	lcl|c219953_g4_i2|m.6660	228	2	2	3	3	2	3	4	3	4	3	2	3	3	3	2	1	3	3	-0.145	-0.5326	1	0.616965	0.532694
504	lcl|c220007_g4_i4|m.6701	698	0	1	0	0	0	0	0	0	0	0	0	0	0	0	0	1	0	0	-0.149	-0.3667	1	0.555678	0.691891
505	lcl|c220008_g2_i5|m.6705	174	1	2	0	0	1	0	0	0	0	1	2	1	1	1	2	1	2	1	-0.235	-0.6169	0.99303	0.635251	0.424552
506	lcl|c220011_g4_i9|m.6707	263	0	1	0	0	0	1	1	1	0	1	1	0	0	1	0	1	1	1	-0.119	-0.2898	1	0.512813	0.740504
507	lcl|c220024_g3_i2|m.6716	334	0	0	1	0	0	0	0	1	0	0	0	0	0	0	0	0	0	0	-0.117	-0.3009	1	0.519632	0.734336
508	lcl|c220050_g2_i1|m.6739	258	0	0	0	0	2	0	1	0	1	1	1	0	0	0	0	1	2	1	-0.28	-0.7153	0.916168	0.648032	0.292824
509	lcl|c220103_g1_i1|m.6751	446	0	0	2	2	1	2	2	1	0	0	0	2	0	1	0	0	0	0	-0.06	-0.1637	0.990612	0.420661	0.793626
510	lcl|c220106_g1_i3|m.6753	226	0	0	0	0	0	0	0	1	0	0	0	0	0	0	0	0	0	0	-0.125	-0.3154	1	0.528214	0.725868
511	lcl|c220191_g1_i1|m.6799	459	0	1	1	3	1	1	0	2	0	2	0	1	1	3	0	1	0	2	0.354	1.0159	0.000656	4.1e-05	0.69445
512	lcl|c220226_g2_i9|m.6827	984	0	0	0	0	1	1	0	0	0	0	1	1	0	0	0	1	0	0	-0.165	-0.4017	1	0.571924	0.664808
513	lcl|c220230_g1_i10|m.6831	269	0	1	0	1	0	1	0	1	0	2	0	0	0	0	0	0	0	1	-0.071	-0.1839	0.993372	0.437134	0.787
514	lcl|c220236_g4_i1|m.6833	350	0	0	1	0	0	0	0	1	0	0	0	4	0	1	0	1	0	1	0.135	0.3427	0.349336	0.04715	0.80141
515	lcl|c220252_g1_i3|m.6839	322	1	0	3	3	2	5	5	6	0	3	3	2	3	2	3	4	4	2	0.023	0.0924	0.812833	0.191934	0.829483
516	lcl|c220263_g1_i4|m.6846	285	0	0	0	0	0	0	0	0	0	1	0	1	0	0	1	0	0	1	-0.116	-0.2937	1	0.515234	0.738367
517	lcl|c220300_g3_i1|m.6859	160	8	15	20	21	15	22	24	18	16	19	22	26	19	17	16	17	21	27	0.038	0.3489	0.338334	0.045159	0.800296
518	lcl|c220306_g1_i8|m.6861	204	0	0	0	1	0	1	0	1	0	0	0	0	0	0	0	1	0	0	-0.13	-0.3258	1	0.534144	0.719497
519	lcl|c220319_g5_i1|m.6862	361	1	0	2	4	2	3	1	2	0	1	1	3	2	4	0	2	1	3	0.45	1.3864	2e-06	0	0.663233
520	lcl|c220360_g1_i11|m.6899	305	1	0	0	0	0	0	0	1	1	1	0	0	2	0	1	0	1	2	-0.118	-0.292	1	0.514182	0.739302
521	lcl|c220380_g1_i3|m.6911	129	0	0	0	0	0	0	0	0	0	0	0	0	0	0	0	0	0	0	-0.126	-0.3276	1	0.535152	0.71837
522	lcl|c220409_g3_i3|m.6926	460	0	1	0	0	0	0	1	1	0	1	0	0	0	0	0	0	0	0	-0.151	-0.3509	1	0.547693	0.703053
523	lcl|c220432_g5_i2|m.6941	227	0	0	0	0	0	2	0	0	0	0	0	0	0	0	0	0	0	0	-0.06	-0.1574	0.989513	0.415406	0.795562
524	lcl|c220464_g2_i2|m.6955	118	0	2	1	1	1	1	2	1	2	1	1	1	2	0	2	0	1	1	-0.283	-0.7452	0.876621	0.650334	0.255297
525	lcl|c220475_g1_i1|m.6962	433	2	4	3	3	2	6	7	13	2	2	1	4	3	2	4	3	4	1	0.174	0.7347	0.017008	0.001399	0.730413
526	lcl|c220485_g3_i1|m.6974	107	0	0	0	0	0	0	0	0	0	0	6	1	0	0	4	5	0	0	-0.284	-0.8778	0.615825	0.653805	0.121109
527	lcl|c220574_g1_i1|m.7009	271	0	0	0	0	0	0	0	0	0	0	0	0	0	1	0	0	0	0	-0.13	-0.3067	1	0.523109	0.731006
528	lcl|c220575_g2_i3|m.7010	119	0	0	0	0	0	1	0	0	0	1	1	0	0	0	0	1	0	1	-0.101	-0.2326	0.997693	0.474271	0.768232
529	lcl|c220577_g5_i1|m.7011	522	0	0	0	0	0	0	0	0	0	0	0	0	0	0	0	0	0	0	-0.139	-0.338	1	0.540864	0.711698
530	lcl|c220609_g5_i1|m.7021	124	0	0	0	0	0	1	0	1	0	0	0	0	0	0	0	0	0	0	-0.113	-0.2851	1	0.509861	0.743035
531	lcl|c220622_g1_i1|m.7032	311	20	16	24	24	17	17	16	11	25	17	14	17	27	27	16	20	27	27	-0.163	-1.5968	0.000986	0.625943	6.4e-05
532	lcl|c220637_g4_i1|m.7052	160	0	1	0	3	0	0	0	2	1	2	2	2	1	1	0	0	1	1	0.2	0.518	0.115036	0.011919	0.768153
533	lcl|c220638_g5_i1|m.7054	125	0	0	1	1	1	1	0	2	0	0	2	1	1	3	3	1	2	3	-0.005	-0.014	0.929482	0.286195	0.824548
534	lcl|c220639_g4_i8|m.7062	350	0	1	0	0	0	0	0	0	0	0	0	0	0	0	0	0	0	0	-0.133	-0.3336	1	0.53847	0.714552
535	lcl|c220640_g5_i2|m.7065	483	16	28	18	26	15	34	23	30	18	22	25	25	20	25	25	31	23	25	0.191	1.927	0	0	0.634203
536	lcl|c220656_g4_i1|m.7074	339	1	1	0	0	0	0	1	1	0	1	0	0	1	1	1	1	2	0	-0.183	-0.4559	1	0.593389	0.616081
537	lcl|c220657_g1_i4|m.7075	363	0	1	0	1	1	1	1	0	1	1	2	3	2	1	2	1	2	1	-0.24	-0.6299	0.987004	0.637444	0.406986
538	lcl|c220657_g1_i5|m.7076	293	0	1	0	1	1	1	0	0	1	1	1	2	1	1	2	1	2	1	-0.159	-0.4248	1	0.5816	0.645073
539	lcl|c220695_g1_i1|m.7091	652	2	0	3	3	4	3	3	6	1	3	3	3	3	3	1	4	4	3	0.073	0.2816	0.464925	0.0706	0.811725
540	lcl|c220714_g5_i7|m.7103	381	0	0	1	1	0	1	0	0	0	0	0	1	0	0	0	1	0	0	-0.134	-0.363	1	0.553845	0.694563
541	lcl|c220736_g3_i1|m.7111	208	6	7	5	6	3	6	5	5	5	6	4	4	4	4	5	3	5	3	-0.089	-0.4006	1	0.571442	0.66571
542	lcl|c220748_g5_i2|m.7116	472	16	32	27	24	17	23	23	32	23	29	20	21	33	38	27	39	25	32	0.15	1.6604	0	0	0.645971
543	lcl|c220806_g2_i3|m.7164	184	9	8	12	10	8	8	10	18	10	14	11	8	8	13	9	9	8	12	0.059	0.411	0.238303	0.028665	0.78871
544	lcl|c220808_g2_i6|m.7171	473	1	1	3	3	1	3	2	7	2	4	3	6	2	5	3	6	4	6	0.551	2.2187	0	0	0.625923
545	lcl|c220831_g1_i1|m.7185	356	0	0	2	0	0	0	2	0	0	0	1	2	4	1	0	1	1	1	-0.384	-1.039	0.267904	0.64902	0.036718
546	lcl|c220834_g8_i2|m.7193	216	0	2	0	0	1	1	0	2	1	0	0	0	2	2	1	1	0	1	0.002	0.004	0.914842	0.269604	0.826305
547	lcl|c220845_g6_i1|m.7197	209	0	0	0	0	1	0	0	0	0	0	2	0	1	0	1	1	0	0	-0.163	-0.4204	1	0.579819	0.648949
548	lcl|c220863_g2_i3|m.7207	295	1	0	2	1	1	4	1	5	0	3	1	1	1	2	0	1	1	2	0.463	1.4421	1e-06	0	0.659385
549	lcl|c220897_g5_i4|m.7224	196	1	3	2	4	4	4	1	1	2	4	2	2	1	2	2	2	1	3	0.297	1.0438	0.000453	2.8e-05	0.691605
550	lcl|c220923_g2_i4|m.7240	887	0	0	0	0	1	0	0	0	1	0	0	3	0	0	3	3	3	2	-0.069	-0.2061	0.995604	0.454534	0.778953
551	lcl|c220936_g1_i1|m.7247	118	0	1	1	1	1	1	1	2	1	1	1	2	1	1	1	1	1	2	0.134	0.3476	0.340632	0.045571	0.80053
552	lcl|c220937_g5_i7|m.7248	281	1	1	2	1	2	1	3	2	1	1	2	1	1	1	0	2	0	2	-0.241	-0.6751	0.956786	0.643835	0.345819
553	lcl|c220945_g4_i2|m.7256	501	0	0	1	1	2	2	2	4	1	2	0	1	0	0	0	0	2	1	-0.007	-0.02	0.933927	0.291749	0.823874
554	lcl|c220954_g1_i2|m.7267	290	36	104	176	244	79	69	9	8	46	41	24	3	40	27	22	12	30	19	-0.006	-0.0962	0.974058	0.36193	0.811338
555	lcl|c220963_g1_i1|m.7276	189	1	0	3	1	1	1	3	1	2	1	5	2	3	2	4	1	4	3	-0.662	-2.117	0	0.615825	0
556	lcl|c220977_g2_i3|m.7288	378	1	0	1	2	2	1	2	3	0	1	0	0	0	0	0	0	0	1	-0.07	-0.1881	0.993785	0.440484	0.78554
557	lcl|c221008_g1_i1|m.7319	274	0	0	1	0	0	0	0	2	0	2	0	1	0	0	0	0	0	0	0.007	0.0176	0.902457	0.257174	0.827375
558	lcl|c221037_g1_i2|m.7337	518	0	0	0	0	0	0	0	0	0	0	0	0	0	0	0	0	0	0	-0.168	-0.42	1	0.579655	0.649299
559	lcl|c221039_g1_i2|m.7339	216	6	5	5	6	6	10	8	9	7	8	11	9	8	10	10	10	8	10	0.022	0.1336	0.748382	0.159407	0.82812
560	lcl|c221039_g3_i2|m.7343	241	0	1	0	0	0	1	1	1	0	1	1	3	0	2	2	2	1	0	0.133	0.3581	0.322324	0.042326	0.798625
561	lcl|c221054_g2_i1|m.7350	470	0	0	0	0	0	0	0	0	0	0	0	0	0	0	0	0	1	0	-0.12	-0.299	1	0.51848	0.735411
562	lcl|c221061_g4_i1|m.7355	581	1	1	0	1	0	1	1	1	0	1	0	0	1	0	1	1	1	1	-0.151	-0.3635	1	0.554094	0.694204
563	lcl|c221077_g1_i1|m.7374	256	0	0	0	1	2	1	2	0	0	0	1	1	2	4	1	1	2	3	-0.038	-0.109	0.978249	0.373428	0.808478
564	lcl|c221101_g1_i2|m.7397	354	0	2	1	1	0	0	0	0	1	1	0	1	0	0	0	1	1	1	-0.052	-0.1302	0.984044	0.392138	0.803238
565	lcl|c221114_g2_i1|m.7405	169	4	0	1	5	2	3	4	2	0	4	5	3	1	6	3	6	4	4	0.21	0.8079	0.00792	0.000607	0.719635
566	lcl|c221130_g3_i2|m.7408	117	4	4	3	4	3	4	2	3	4	5	5	2	3	4	4	4	5	6	-0.007	-0.0276	0.939266	0.298794	0.822957
567	lcl|c221178_g2_i3|m.7449	781	0	1	0	1	0	0	0	0	1	0	0	0	0	0	0	0	0	0	-0.141	-0.3229	1	0.53251	0.7213
568	lcl|c221189_g3_i1|m.7459	154	1	0	1	0	1	1	1	1	0	0	1	2	0	1	1	0	1	0	-0.009	-0.0231	0.936149	0.294621	0.823509
569	lcl|c221194_g2_i1|m.7463	565	1	6	5	7	4	5	2	1	1	2	1	0	1	4	2	1	0	2	0.277	1.0045	0.000762	4.9e-05	0.695644
570	lcl|c221198_g6_i3|m.7467	335	0	0	1	0	0	0	0	0	0	0	0	0	0	0	0	0	0	0	-0.133	-0.3098	1	0.524943	0.729195
571	lcl|c221205_g1_i1|m.7472	112	0	1	2	2	2	1	2	2	0	0	3	5	0	2	3	0	2	3	-0.006	-0.0182	0.932616	0.290082	0.824081
572	lcl|c221225_g1_i1|m.7492	247	7	9	7	8	6	8	9	9	7	7	8	11	11	9	12	9	9	8	-0.07	-0.4138	1	0.577093	0.654659
573	lcl|c221236_g6_i3|m.7501	195	1	1	2	1	1	2	1	2	1	2	2	1	1	1	1	1	3	2	-0.121	-0.3643	1	0.554492	0.693628
574	lcl|c221238_g1_i4|m.7502	121	2	5	5	4	7	7	6	7	6	7	3	3	6	8	4	5	9	2	-0.106	-0.5393	1	0.618688	0.524649
575	lcl|c221244_g1_i4|m.7506	140	0	0	0	0	1	0	1	0	0	0	0	0	0	0	1	2	1	2	0.097	0.2572	0.513464	0.082044	0.815406
576	lcl|c221246_g1_i5|m.7511	385	0	0	0	0	0	1	0	0	0	0	0	0	0	0	0	0	0	0	-0.149	-0.3754	1	0.5599	0.685467
577	lcl|c221253_g7_i1|m.7518	403	1	0	0	0	1	0	2	2	0	0	0	0	0	0	0	1	0	0	-0.154	-0.3671	1	0.555875	0.691601
578	lcl|c221281_g1_i1|m.7530	260	1	2	1	4	0	2	3	0	1	3	0	3	1	3	1	1	1	2	0.416	1.23	2.9e-05	2e-06	0.674979
579	lcl|c221281_g1_i1|m.7531	183	3	8	7	8	5	11	9	11	4	10	6	5	6	8	5	7	6	9	0.295	1.6115	0	0	0.648715
580	lcl|c221296_g1_i3|m.7550	157	21	27	30	29	25	25	33	29	33	27	19	24	24	34	22	22	24	27	-0.056	-0.5971	0.999394	0.631591	0.451059
581	lcl|c221301_g3_i3|m.7552	150	0	0	0	0	0	0	0	0	0	0	1	0	0	0	0	0	0	0	-0.097	-0.2364	0.997833	0.477005	0.76659
582	lcl|c221337_g4_i1|m.7577	447	0	0	0	0	1	0	0	0	0	0	0	1	0	0	0	0	0	0	-0.105	-0.2658	0.999498	0.49733	0.752945
583	lcl|c221340_g4_i1|m.7579	515	1	4	3	4	4	3	6	1	3	1	2	1	2	2	3	2	3	4	-0.323	-1.1721	0.098979	0.642619	0.01099
584	lcl|c221356_g3_i2|m.7588	707	4	6	18	8	4	5	12	13	6	6	16	16	3	5	12	9	12	13	-0.138	-0.8817	0.606688	0.653775	0.118088
585	lcl|c221374_g4_i3|m.7595	283	0	1	0	0	1	2	1	1	2	0	0	0	1	0	1	2	1	2	0.028	0.069	0.844835	0.211619	0.829486
586	lcl|c221427_g1_i4|m.7617	479	1	1	0	0	0	0	1	2	0	0	0	2	0	0	0	0	3	1	-0.124	-0.3251	1	0.533751	0.719934
587	lcl|c221439_g3_i7|m.7630	335	0	0	0	0	0	0	0	0	0	0	0	0	0	0	0	0	0	0	-0.157	-0.3734	1	0.55894	0.686962
588	lcl|c221440_g2_i5|m.7632	362	1	1	1	3	1	1	2	2	3	2	2	2	2	2	1	3	2	2	0.071	0.2157	0.596248	0.104405	0.820903
589	lcl|c221441_g1_i5|m.7633	559	3	8	4	6	4	5	3	8	4	8	4	6	5	8	3	6	7	8	0.392	1.971	0	0	0.632745
590	lcl|c221444_g1_i1|m.7638	398	0	0	1	2	0	1	0	2	0	1	0	2	0	1	0	1	0	0	0.098	0.2613	0.505239	0.080034	0.814809
591	lcl|c221450_g9_i6|m.7639	488	1	0	1	1	1	1	1	0	0	0	1	1	1	1	1	1	2	1	-0.209	-0.5541	1	0.622319	0.506487
592	lcl|c221461_g2_i7|m.7655	295	0	0	1	0	0	1	0	0	0	0	1	0	1	0	0	0	0	0	-0.159	-0.3796	1	0.561894	0.682295
593	lcl|c221482_g1_i3|m.7664	468	2	2	2	2	2	2	2	3	2	5	3	4	1	2	1	3	1	2	0.297	1.0284	0.000556	3.5e-05	0.693162
594	lcl|c221495_g1_i4|m.7674	312	0	0	0	0	0	0	0	0	0	1	0	1	1	0	0	0	1	1	-0.124	-0.3051	1	0.522156	0.731932
595	lcl|c221497_g1_i2|m.7677	265	0	0	1	1	0	1	1	0	0	1	0	0	0	0	0	0	0	0	-0.085	-0.1993	0.995001	0.449286	0.781506
596	lcl|c221514_g6_i1|m.7698	249	2	0	2	1	0	3	1	1	1	1	1	4	1	3	1	1	2	1	0.134	0.4066	0.244735	0.029642	0.78955
597	lcl|c221524_g4_i2|m.7708	280	1	0	0	1	36	35	3	5	1	1	2	0	1	0	24	13	3	3	-0.287	-1.5783	0.001254	0.626469	8.3e-05
598	lcl|c221524_g4_i5|m.7709	330	1	0	0	1	23	23	3	5	1	1	2	0	1	0	21	12	3	3	-0.245	-1.3298	0.022556	0.63532	0.002049
599	lcl|c221532_g1_i2|m.7711	201	0	0	0	0	0	1	1	1	0	0	0	0	0	1	1	0	0	0	-0.097	-0.2269	0.997189	0.470123	0.770644
600	lcl|c221583_g3_i2|m.7741	426	9	16	9	16	16	18	16	15	11	15	18	17	13	21	19	18	18	14	0.055	0.4832	0.148254	0.016065	0.774813
601	lcl|c221586_g4_i2|m.7745	286	1	1	5	4	3	1	3	1	4	4	3	4	4	3	3	2	5	5	-0.282	-1.0621	0.229577	0.647965	0.030202
602	lcl|c221593_g3_i1|m.7753	194	8	6	7	6	6	9	9	9	8	8	7	8	10	9	7	7	10	9	-0.118	-0.7439	0.878518	0.650248	0.256885
603	lcl|c221608_g1_i1|m.7755	596	8	11	3	15	7	16	13	20	6	14	7	12	12	18	9	16	9	26	0.582	4.0276	0	0	0.604529
604	lcl|c221613_g3_i1|m.7758	257	1	4	3	2	3	1	1	1	4	2	1	0	2	0	3	2	2	2	-0.32	-0.9906	0.360231	0.651034	0.054223
605	lcl|c221619_g2_i1|m.7763	143	2	1	5	3	1	2	6	4	4	4	5	6	5	5	3	1	2	2	-0.241	-0.9966	0.348007	0.650803	0.05174
606	lcl|c221649_g6_i2|m.7773	137	0	0	0	2	0	1	1	0	0	1	0	0	1	0	0	0	1	0	0.02	0.0485	0.869893	0.22946	0.829002
607	lcl|c221662_g2_i4|m.7775	226	6	9	7	9	4	5	5	5	5	8	4	10	7	5	2	4	6	8	0.199	1.1148	0.000168	1e-05	0.684825
608	lcl|c221666_g1_i3|m.7779	150	0	0	0	0	1	0	0	0	0	0	0	0	0	1	0	1	0	0	-0.096	-0.2353	0.997809	0.476216	0.767068
609	lcl|c221672_g4_i6|m.7784	412	1	0	2	3	1	1	2	3	1	0	2	0	0	0	3	2	2	1	-0.166	-0.4986	1	0.607421	0.571699
610	lcl|c221676_g4_i4|m.7786	321	11	8	8	10	7	12	8	7	11	10	8	6	8	9	9	8	12	11	-0.11	-0.7117	0.920471	0.64771	0.297469
611	lcl|c221694_g2_i1|m.7797	309	0	0	0	0	0	0	0	0	0	0	0	0	0	0	0	2	2	1	-0.111	-0.2919	1	0.51412	0.739357
612	lcl|c221711_g1_i1|m.7807	106	0	0	0	0	0	0	0	0	0	0	0	0	0	0	0	0	0	0	-0.125	-0.3037	1	0.521318	0.732737
613	lcl|c221736_g1_i11|m.7820	145	10	5	10	11	4	4	13	10	14	11	7	5	12	11	16	8	12	15	-0.3	-1.9378	5e-06	0.618642	0
614	lcl|c221753_g3_i7|m.7844	359	9	10	12	10	8	11	8	14	9	17	12	18	10	9	15	10	7	16	0.158	1.1105	0.000179	1e-05	0.685219
615	lcl|c221774_g2_i1|m.7854	301	0	0	0	0	1	0	0	0	0	1	0	0	0	0	0	0	0	0	-0.132	-0.3257	1	0.534088	0.71956
616	lcl|c221787_g3_i3|m.7863	241	0	0	1	2	0	1	0	1	0	0	0	0	0	0	0	0	0	0	-0.04	-0.0997	0.975254	0.365087	0.810578
617	lcl|c221802_g2_i1|m.7868	342	0	2	1	3	1	4	1	0	3	1	1	0	1	0	1	2	1	2	0.243	0.7186	0.019967	0.001668	0.732927
618	lcl|c221840_g3_i2|m.7908	461	1	1	2	5	2	6	4	1	3	4	0	4	4	4	0	3	3	4	0.296	1.0966	0.000218	1.3e-05	0.686505
619	lcl|c221840_g3_i5|m.7911	286	0	1	3	6	2	7	3	6	4	3	1	2	5	5	1	3	2	7	0.429	1.6801	0	0	0.644914
620	lcl|c221844_g2_i1|m.7916	122	0	0	0	0	0	0	0	0	0	0	0	0	0	0	0	0	0	0	-0.118	-0.2946	1	0.515788	0.737869
621	lcl|c221849_g1_i2|m.7917	214	1	0	1	2	2	3	0	2	1	2	1	7	2	7	2	1	3	1	0.443	1.4753	0	0	0.657167
622	lcl|c221855_g2_i3|m.7925	314	4	2	7	6	3	10	4	7	5	3	4	4	5	4	3	5	7	5	-0.025	-0.1231	0.982298	0.385923	0.805064
623	lcl|c221860_g1_i4|m.7929	195	0	0	0	1	1	1	0	1	0	1	0	4	1	2	1	1	0	1	0.206	0.5548	0.086497	0.008575	0.761229
624	lcl|c221883_g2_i12|m.7953	683	10	18	9	22	16	18	20	15	9	15	8	8	11	21	14	13	27	23	0.085	0.7411	0.015945	0.001303	0.729429
625	lcl|c221890_g1_i1|m.7971	375	0	0	0	0	1	1	2	1	0	1	0	1	0	0	0	0	1	1	-0.205	-0.4957	1	0.606543	0.574879
626	lcl|c221925_g1_i3|m.7988	563	36	31	58	47	45	46	50	44	40	48	58	53	48	36	52	52	67	60	-0.175	-2.6037	0	0.610398	0
627	lcl|c221967_g2_i3|m.8016	272	1	1	1	0	0	3	0	1	0	2	1	5	1	3	2	1	0	1	0.392	1.1093	0.000182	1.1e-05	0.685329
628	lcl|c221968_g1_i1|m.8017	625	0	0	0	0	0	0	0	0	0	0	1	0	0	0	1	1	0	0	-0.136	-0.3203	1	0.531032	0.722899
629	lcl|c221971_g3_i2|m.8022	412	0	0	1	0	1	1	0	1	0	2	0	0	0	1	0	0	0	0	-0.059	-0.1439	0.987085	0.403971	0.799509
630	lcl|c221999_g1_i4|m.8036	613	0	0	1	0	0	0	0	0	0	1	0	0	0	1	0	0	0	0	-0.144	-0.3366	1	0.540105	0.712611
631	lcl|c222028_g1_i5|m.8060	658	0	0	0	2	0	0	0	0	0	0	1	0	0	1	0	0	0	0	-0.08	-0.2054	0.995564	0.453997	0.779219
632	lcl|c222067_g2_i1|m.8074	416	1	0	1	0	1	1	1	1	1	0	0	1	0	1	0	0	0	0	-0.09	-0.2224	0.996989	0.466811	0.772508
633	lcl|c222117_g4_i1|m.8104	330	0	0	0	1	1	0	0	0	1	1	2	1	1	1	0	0	2	1	-0.219	-0.5757	0.999991	0.627205	0.479094
634	lcl|c222123_g3_i1|m.8109	442	0	0	1	0	1	0	2	0	0	0	1	0	1	1	0	0	1	0	-0.224	-0.5696	0.999999	0.625874	0.486929
635	lcl|c222128_g1_i1|m.8114	545	0	0	0	0	0	1	0	0	0	0	0	0	0	1	0	0	0	1	-0.151	-0.3629	1	0.553796	0.694634
636	lcl|c222140_g4_i1|m.8123	1085	0	0	0	0	0	0	0	0	0	0	0	1	0	0	0	0	0	0	-0.156	-0.3785	1	0.561374	0.68313
637	lcl|c222155_g2_i2|m.8140	158	0	0	0	0	0	0	0	0	0	0	0	0	0	0	0	1	0	0	-0.084	-0.204	0.99547	0.452921	0.77975
638	lcl|c222186_g2_i2|m.8151	221	3	2	3	4	5	5	6	7	7	4	5	8	3	7	7	5	5	2	-0.086	-0.3932	1	0.568157	0.671692
639	lcl|c222187_g6_i1|m.8152	419	0	0	0	2	0	2	1	2	1	1	0	0	0	0	0	1	1	1	0.072	0.1894	0.647483	0.120493	0.823798
640	lcl|c222196_g3_i1|m.8162	140	0	1	2	1	1	2	1	4	2	1	2	1	1	1	2	2	1	1	-0.02	-0.0564	0.956637	0.325488	0.818822
641	lcl|c222197_g1_i5|m.8163	375	0	1	1	3	2	3	0	4	1	2	1	1	1	1	1	2	2	1	0.251	0.746	0.015172	0.001234	0.72868
642	lcl|c222200_g1_i1|m.8165	150	0	0	0	0	0	0	0	0	0	0	0	1	0	0	0	0	0	0	-0.123	-0.2771	1	0.504745	0.747237
643	lcl|c222208_g5_i7|m.8170	516	1	2	3	5	4	8	5	6	1	7	4	2	3	5	1	2	2	2	0.318	1.3458	4e-06	0	0.666141
644	lcl|c222210_g1_i4|m.8175	409	0	0	0	0	0	1	0	0	0	0	1	0	0	0	0	0	0	0	-0.15	-0.3592	1	0.55194	0.69727
645	lcl|c222225_g1_i1|m.8189	377	0	0	1	0	0	0	1	0	1	1	0	0	0	0	0	0	0	0	-0.105	-0.2566	0.998986	0.491129	0.757399
646	lcl|c222254_g8_i6|m.8206	391	0	0	0	0	0	0	0	0	0	0	0	0	0	0	0	0	1	0	-0.142	-0.3511	1	0.547797	0.702916
647	lcl|c222259_g2_i10|m.8212	511	0	0	0	0	0	0	1	1	0	0	0	1	0	0	0	1	0	0	-0.121	-0.302	1	0.520296	0.73371
648	lcl|c222286_g2_i1|m.8232	302	0	1	2	1	1	1	0	2	0	1	0	0	0	0	0	0	0	0	-0.149	-0.3676	1	0.556121	0.691236
649	lcl|c222306_g8_i4|m.8236	192	10	16	13	12	13	14	11	12	12	17	14	9	10	13	10	7	16	17	-0.028	-0.2235	0.997058	0.467624	0.772056
650	lcl|c222306_g9_i1|m.8237	246	11	4	6	5	21	19	23	17	6	10	16	17	7	21	21	13	19	27	-0.053	-0.446	1	0.589786	0.625615
651	lcl|c222319_g4_i3|m.8243	103	5	7	5	10	0	7	1	7	3	8	0	9	2	8	3	7	1	7	1.003	4.366	0	0	0.603591
652	lcl|c222323_g2_i2|m.8244	420	0	0	0	0	0	0	1	0	0	0	0	1	1	0	0	0	1	0	-0.116	-0.2763	1	0.504227	0.74765
653	lcl|c222323_g2_i2|m.8245	289	0	1	2	2	2	2	2	2	1	3	2	1	1	1	2	0	1	2	-0.105	-0.3102	1	0.525179	0.72896
654	lcl|c222342_g2_i1|m.8256	270	0	1	0	0	0	1	0	0	0	0	0	0	0	0	0	0	0	1	-0.105	-0.2679	0.999643	0.498724	0.751905
655	lcl|c222343_g4_i1|m.8262	324	2	3	1	1	5	5	5	2	5	0	6	0	7	5	3	5	2	2	-0.426	-1.7247	0.000168	0.622743	9e-06
656	lcl|c222353_g1_i1|m.8273	474	0	0	0	0	0	0	0	0	0	0	0	0	0	0	0	0	0	0	-0.132	-0.3096	1	0.524825	0.729313
657	lcl|c222355_g2_i4|m.8274	160	2	4	2	3	2	2	1	2	0	2	1	1	0	2	0	0	1	1	0.185	0.537	0.0995	0.010073	0.764559
658	lcl|c222377_g6_i1|m.8283	384	1	1	1	0	0	0	0	0	1	0	0	0	0	0	0	0	1	0	-0.086	-0.2056	0.995576	0.454151	0.779143
659	lcl|c222386_g1_i1|m.8298	326	0	4	1	2	0	1	0	3	3	8	3	10	3	7	6	4	0	0	0.575	2.2316	0	0	0.6256
660	lcl|c222393_g1_i8|m.8302	170	0	0	0	0	0	0	0	0	0	0	0	0	0	0	0	0	0	0	-0.119	-0.2925	1	0.514492	0.739028
661	lcl|c222399_g1_i2|m.8304	195	7	10	10	13	5	11	14	14	7	10	6	7	13	16	8	8	8	8	0.099	0.6543	0.036831	0.00328	0.743467
662	lcl|c222400_g6_i5|m.8305	398	1	0	0	1	0	1	1	1	1	0	0	0	1	1	0	0	0	0	-0.125	-0.2994	1	0.518723	0.735185
663	lcl|c222419_g1_i2|m.8314	183	5	9	5	4	7	7	8	6	5	6	9	8	5	6	8	9	5	7	0.001	0.0052	0.913795	0.268503	0.826409
664	lcl|c222419_g1_i6|m.8316	190	5	10	5	4	6	6	8	6	6	6	10	8	6	6	8	10	5	8	0.003	0.0144	0.905472	0.260088	0.827143
665	lcl|c222433_g3_i2|m.8329	204	0	0	3	1	1	1	0	0	1	1	0	0	1	0	2	0	0	0	-0.319	-0.8675	0.639552	0.653854	0.129348
666	lcl|c222436_g10_i1|m.8337	119	0	1	1	0	0	0	1	0	1	0	1	1	0	0	1	2	1	2	0.05	0.1294	0.755426	0.162586	0.828334
667	lcl|c222437_g1_i2|m.8353	210	26	32	25	48	57	71	50	60	45	50	57	91	52	77	88	76	82	95	0.132	2.2	0	0	0.626393
668	lcl|c222451_g1_i1|m.8369	185	1	1	3	4	3	3	4	7	2	3	3	1	1	4	2	2	3	2	0.097	0.3557	0.32648	0.043051	0.799063
669	lcl|c222456_g3_i2|m.8372	230	0	0	0	0	0	1	0	0	0	0	0	1	0	0	0	0	0	0	-0.105	-0.2635	0.999458	0.495793	0.754075
670	lcl|c222459_g5_i1|m.8379	326	4	9	19	27	13	25	16	29	15	26	7	20	8	20	16	23	12	20	0.481	4.1269	0	0	0.604226
671	lcl|c222484_g2_i1|m.8393	262	8	7	10	11	6	14	14	16	6	10	9	24	7	12	10	6	9	8	0.229	1.5769	0	0	0.650756
672	lcl|c222521_g8_i1|m.8406	251	0	0	0	0	0	0	0	0	0	0	0	1	0	0	0	0	1	1	-0.102	-0.2585	0.999169	0.492421	0.756494
673	lcl|c222526_g1_i2|m.8408	491	2	2	2	3	1	1	3	1	2	1	1	2	1	1	0	2	1	1	-0.114	-0.345	1	0.544604	0.707058
674	lcl|c222542_g3_i2|m.8415	198	2	0	0	2	1	3	1	2	0	3	1	2	2	0	0	1	2	2	0.167	0.4916	0.139648	0.014965	0.773198
675	lcl|c222543_g3_i2|m.8418	235	0	0	0	0	0	0	32	27	0	0	0	0	0	0	0	0	0	0	-0.241	-1.0495	0.250001	0.648546	0.033623
676	lcl|c222546_g5_i2|m.8425	334	0	1	1	0	0	1	1	1	2	3	0	2	0	0	0	0	0	0	0.017	0.0456	0.873197	0.232023	0.828896
677	lcl|c222548_g1_i3|m.8426	338	0	0	0	1	0	0	0	0	0	0	0	0	0	0	0	0	0	0	-0.124	-0.3044	1	0.521737	0.732335
678	lcl|c222555_g2_i4|m.8428	624	21	41	31	42	51	46	39	48	35	44	34	19	38	33	36	36	35	39	-0.028	-0.3739	1	0.559181	0.686589
679	lcl|c222558_g2_i4|m.8433	448	0	0	0	0	0	1	0	0	0	1	0	1	0	0	0	0	0	1	-0.124	-0.3125	1	0.526527	0.7276
680	lcl|c222581_g2_i12|m.8451	210	1	0	4	7	1	6	3	8	0	5	0	4	0	0	0	2	0	3	0.759	2.6063	0	0	0.616595
681	lcl|c222581_g2_i12|m.8452	117	0	1	3	2	2	2	2	3	0	2	2	0	1	1	2	3	1	3	0.06	0.1892	0.647869	0.120621	0.823818
682	lcl|c222639_g5_i2|m.8480	210	25	47	30	39	45	41	61	46	42	44	40	21	40	44	37	42	33	38	-0.074	-1.0067	0.327852	0.6504	0.047769
683	lcl|c222653_g7_i1|m.8496	290	2	2	2	6	1	5	2	5	4	6	3	2	4	4	1	3	3	7	0.43	1.7358	0	0	0.642087
684	lcl|c222667_g10_i2|m.8509	141	1	0	1	0	2	1	0	0	2	0	1	0	1	0	0	0	2	3	-0.183	-0.4824	1	0.602377	0.589156
685	lcl|c222682_g3_i7|m.8525	229	6	7	7	8	8	11	8	13	10	10	8	12	9	9	9	9	6	9	0.113	0.7328	0.017336	0.001429	0.730707
686	lcl|c222691_g4_i1|m.8535	570	2	3	6	9	9	7	4	9	5	4	8	5	6	7	6	6	10	6	-0.075	-0.3981	1	0.570342	0.667749
687	lcl|c222693_g1_i1|m.8538	183	1	0	0	0	0	0	0	2	1	0	1	1	1	0	0	0	0	0	-0.07	-0.1767	0.992409	0.43133	0.789436
688	lcl|c222694_g7_i2|m.8539	451	0	0	0	0	0	0	0	0	0	0	0	0	1	0	0	0	0	0	-0.131	-0.3174	1	0.529369	0.724663
689	lcl|c222727_g3_i2|m.8582	211	11	17	11	17	12	14	13	16	12	14	11	18	10	12	7	11	9	17	0.247	1.8902	0	0	0.635514
690	lcl|c222750_g1_i9|m.8600	174	1	1	1	1	2	1	1	1	1	2	3	0	0	2	1	2	1	0	-0.098	-0.251	0.998804	0.487284	0.760027
691	lcl|c222798_g5_i3|m.8621	174	0	0	1	0	0	0	1	1	0	0	0	0	0	0	2	1	1	2	-0.12	-0.3115	1	0.525942	0.728193
692	lcl|c222823_g2_i1|m.8631	512	0	0	1	2	0	1	0	0	1	0	0	0	0	0	0	0	1	1	-0.009	-0.0235	0.936431	0.294992	0.823461
693	lcl|c222837_g1_i1|m.8646	301	16	21	18	22	32	21	27	16	22	24	15	31	26	40	22	24	37	53	0.053	0.5885	0.065639	0.006264	0.755037
694	lcl|c222852_g4_i5|m.8661	462	3	0	3	4	2	3	2	2	2	2	3	4	3	5	3	3	4	5	0.051	0.198	0.63093	0.115069	0.822907
695	lcl|c222899_g2_i4|m.8691	257	3	0	3	3	1	4	3	8	1	6	5	12	0	4	5	3	2	5	0.544	2.3884	0	0	0.621722
696	lcl|c222905_g1_i3|m.8695	156	0	0	0	0	0	0	0	1	0	0	0	1	0	0	0	0	0	0	-0.086	-0.2146	0.996363	0.46099	0.77565
697	lcl|c222909_g1_i1|m.8698	165	1	3	2	2	3	2	3	2	2	2	2	4	2	3	2	2	3	3	0.031	0.1122	0.783099	0.175936	0.829036
698	lcl|c222929_g2_i3|m.8717	108	11	6	22	19	13	14	5	9	17	12	16	11	19	19	29	23	28	19	-0.278	-2.4011	0	0.61222	0
699	lcl|c222930_g3_i1|m.8719	738	0	0	0	0	0	0	0	0	0	0	0	0	0	0	0	0	0	0	-0.132	-0.3243	1	0.533301	0.720432
700	lcl|c222937_g2_i3|m.8724	199	7	10	9	13	8	12	10	13	8	14	9	6	9	10	7	10	8	13	0.18	1.1699	7.5e-05	4e-06	0.679959
701	lcl|c222943_g1_i1|m.8725	345	0	3	2	2	1	2	2	6	2	2	8	13	1	1	1	2	0	0	0.435	1.664	0	0	0.645776
702	lcl|c222946_g2_i3|m.8728	182	10	22	22	25	11	22	21	29	11	27	18	15	12	11	14	10	17	11	0.13	1.1471	0.000105	6e-06	0.681935
703	lcl|c222946_g2_i8|m.8729	183	6	13	12	14	6	9	14	17	9	14	10	4	9	7	8	7	8	7	0.008	0.0532	0.864369	0.225326	0.829154
704	lcl|c222950_g5_i5|m.8734	584	9	21	28	27	14	29	20	25	14	25	17	24	23	21	15	19	20	25	0.192	1.8267	0	0	0.637997
705	lcl|c222950_g5_i5|m.8735	279	4	10	11	11	7	8	10	13	7	12	8	11	9	5	7	12	8	13	0.184	1.2531	2e-05	1e-06	0.673144
706	lcl|c222950_g5_i7|m.8739	156	2	4	4	3	2	3	3	3	1	4	2	4	3	3	1	4	3	7	0.36	1.4208	1e-06	0	0.660837
707	lcl|c222957_g1_i2|m.8747	211	1	1	1	1	1	1	2	1	1	2	3	2	2	2	1	3	2	2	-0.064	-0.1964	0.994679	0.447026	0.78257
708	lcl|c222960_g2_i1|m.8750	473	25	35	32	32	25	38	38	45	28	41	32	18	24	39	34	34	25	42	0.094	1.1095	0.000181	1.1e-05	0.68531
709	lcl|c223031_g4_i4|m.8820	350	0	0	0	0	0	0	0	0	0	0	0	0	0	0	0	0	1	0	-0.122	-0.3166	1	0.528908	0.725146
710	lcl|c223053_g2_i3|m.8836	361	1	2	0	0	0	1	2	2	0	0	2	0	0	2	3	1	1	2	-0.133	-0.3891	1	0.5663	0.674942
711	lcl|c223077_g2_i1|m.8858	178	28	20	39	35	39	41	34	50	32	39	35	34	33	36	51	36	36	33	-0.104	-1.2791	0.037485	0.637546	0.003621
712	lcl|c223078_g3_i2|m.8859	240	0	0	0	0	0	0	0	0	0	0	0	0	0	1	0	0	0	1	-0.083	-0.2029	0.995381	0.452074	0.780164
713	lcl|c223098_g6_i2|m.8877	362	0	0	0	0	0	0	0	0	1	0	2	0	2	0	0	0	1	1	-0.252	-0.6482	0.976555	0.640257	0.382169
714	lcl|c223139_g3_i2|m.8898	117	0	1	1	0	2	2	3	3	1	1	2	6	1	6	1	2	3	7	0.497	1.6351	0	0	0.64737
715	lcl|c223162_g2_i6|m.8914	891	0	1	1	1	1	1	1	0	1	0	1	0	0	0	1	0	2	1	-0.209	-0.5256	1	0.615111	0.540977
716	lcl|c223200_g1_i1|m.8933	124	0	0	1	1	0	2	0	2	0	2	0	1	0	1	1	1	1	0	0.103	0.267	0.493903	0.077299	0.813964
717	lcl|c223205_g4_i1|m.8934	312	0	0	2	1	1	2	1	1	1	2	2	5	2	1	4	1	2	2	-0.06	-0.1781	0.992577	0.432464	0.788969
718	lcl|c223214_g1_i1|m.8951	273	0	0	1	0	0	1	0	0	0	0	0	3	0	1	1	1	0	0	0.079	0.2165	0.59468	0.103939	0.820808
719	lcl|c223239_g4_i2|m.8965	112	0	1	0	2	0	1	2	2	0	2	0	0	2	1	0	0	1	0	-0.059	-0.1514	0.988523	0.410352	0.797351
720	lcl|c223247_g3_i6|m.8971	100	8	12	12	14	8	14	10	14	10	13	5	11	9	9	5	5	6	12	0.232	1.5907	0	0	0.649933
721	lcl|c223259_g2_i5|m.8979	313	0	0	0	0	0	0	0	0	0	0	0	0	0	0	1	0	0	0	-0.107	-0.2592	0.999226	0.492896	0.756158
722	lcl|c223274_g3_i3|m.8991	104	2	3	2	3	1	3	2	4	1	2	2	2	1	2	3	2	1	2	0.304	1.0108	0.000702	4.4e-05	0.694982
723	lcl|c223275_g1_i2|m.8992	338	10	29	20	53	24	38	25	49	24	35	15	27	15	47	23	37	21	59	0.633	7.2918	0	0	0.599819
724	lcl|c223317_g1_i9|m.9035	1112	2	0	0	0	0	1	0	0	0	0	0	0	0	0	0	0	0	0	-0.266	-0.6285	0.987679	0.637216	0.408882
725	lcl|c223331_g1_i2|m.9037	144	0	1	0	0	2	2	1	2	2	0	0	2	0	1	2	0	1	0	-0.109	-0.3162	1	0.528677	0.725387
726	lcl|c223345_g3_i1|m.9044	287	1	4	3	2	3	3	4	2	2	2	3	1	1	2	2	2	2	2	-0.173	-0.5758	0.999991	0.627227	0.478965
727	lcl|c223351_g1_i1|m.9046	515	3	4	3	2	1	3	5	5	4	3	3	3	1	4	1	2	2	3	0.11	0.3985	0.256839	0.031513	0.791089
728	lcl|c223355_g1_i3|m.9051	622	0	1	0	0	0	2	1	5	0	3	0	0	0	3	1	1	2	0	0.332	0.9646	0.00127	8.4e-05	0.699979
729	lcl|c223357_g4_i3|m.9060	380	0	2	1	1	1	3	1	1	1	3	0	0	0	1	1	2	0	1	0.237	0.6209	0.0497	0.004581	0.749247
730	lcl|c223365_g2_i2|m.9063	401	0	2	1	0	1	0	0	0	0	0	0	2	0	0	2	1	0	0	-0.011	-0.0294	0.940476	0.300463	0.822729
731	lcl|c223378_g2_i2|m.9075	284	0	0	0	0	0	0	0	0	0	0	0	0	0	0	0	0	1	0	-0.129	-0.2973	1	0.517444	0.736366
732	lcl|c223390_g1_i1|m.9087	341	0	0	0	0	0	0	0	1	0	0	0	0	0	1	0	0	0	0	-0.16	-0.3875	1	0.565568	0.676198
733	lcl|c223414_g3_i3|m.9104	326	0	0	0	0	0	0	0	0	0	0	0	0	1	0	0	0	0	0	-0.144	-0.3647	1	0.55469	0.693339
734	lcl|c223425_g3_i3|m.9106	230	1	1	1	2	3	3	3	3	1	3	3	3	1	2	5	6	4	4	0.103	0.3981	0.257447	0.031608	0.791165
735	lcl|c223432_g3_i1|m.9111	190	0	0	1	0	1	1	0	1	0	0	1	0	1	0	0	1	1	0	-0.122	-0.3047	1	0.521917	0.732162
736	lcl|c223433_g6_i1|m.9115	297	0	2	2	3	2	3	2	5	0	1	1	2	1	3	1	1	2	2	0.33	1.0103	0.000707	4.5e-05	0.695034
737	lcl|c223433_g6_i1|m.9116	125	0	0	2	2	1	1	0	1	0	1	0	0	0	0	0	0	1	2	-0.074	-0.1947	0.994555	0.445695	0.783188
738	lcl|c223448_g1_i3|m.9130	274	0	1	0	0	0	0	1	0	0	1	0	2	0	2	0	2	0	2	0.182	0.476	0.155927	0.017061	0.776199
739	lcl|c223454_g1_i3|m.9139	265	2	1	6	4	2	5	6	2	5	3	7	6	2	1	6	3	4	2	-0.445	-1.8665	1.8e-05	0.619893	1e-06
740	lcl|c223456_g2_i1|m.9146	171	0	0	0	0	0	0	0	0	0	0	0	0	0	0	0	0	1	0	-0.102	-0.2488	0.99864	0.485758	0.761042
741	lcl|c223475_g2_i9|m.9154	168	0	1	0	0	0	0	0	2	0	1	0	0	0	1	0	0	0	0	-0.024	-0.0591	0.958023	0.327983	0.81838
742	lcl|c223499_g2_i4|m.9171	139	0	0	0	0	0	0	0	0	0	0	0	2	0	0	0	0	0	0	-0.023	-0.0559	0.956374	0.325026	0.818903
743	lcl|c223499_g2_i8|m.9175	176	1	1	1	1	0	1	1	1	2	1	1	2	2	2	2	1	1	1	-0.178	-0.4801	1	0.601634	0.591573
744	lcl|c223510_g3_i1|m.9178	1249	0	0	0	0	0	0	0	2	0	0	0	0	0	1	0	0	0	0	-0.062	-0.1587	0.989744	0.416494	0.795168
745	lcl|c223526_g1_i4|m.9192	334	0	0	0	0	0	1	0	0	0	0	0	0	0	0	0	1	0	0	-0.135	-0.3592	1	0.55194	0.69727
746	lcl|c223556_g1_i6|m.9203	288	18	19	14	12	15	17	21	26	14	20	14	13	14	15	25	16	14	14	-0.089	-0.7511	0.867954	0.650712	0.248143
747	lcl|c223583_g5_i3|m.9218	185	0	0	0	1	0	0	0	0	0	0	0	0	0	0	2	1	0	1	-0.2	-0.4984	1	0.607361	0.571919
748	lcl|c223597_g3_i2|m.9232	218	1	0	1	2	1	6	2	6	0	3	5	8	0	1	0	0	0	1	0.553	1.8639	0	0	0.636507
749	lcl|c223604_g1_i1|m.9235	380	0	0	0	0	1	0	1	0	0	0	0	0	0	0	3	8	6	4	0.077	0.2475	0.532871	0.08694	0.816783
750	lcl|c223608_g1_i1|m.9238	854	0	1	2	1	2	2	1	1	1	1	0	1	0	1	0	0	2	2	-0.241	-0.6231	0.990312	0.636318	0.416186
751	lcl|c223611_g2_i2|m.9249	465	1	0	2	1	2	3	0	1	1	1	0	2	0	1	0	1	0	0	-0.074	-0.1965	0.994686	0.447104	0.782534
752	lcl|c223616_g1_i1|m.9252	300	1	1	2	1	1	3	1	2	1	2	2	1	0	2	1	0	3	0	-0.058	-0.1624	0.99041	0.419581	0.794031
753	lcl|c223617_g5_i1|m.9254	131	0	0	2	3	2	1	1	0	1	0	0	0	1	0	1	0	0	0	-0.073	-0.1927	0.99437	0.444123	0.783909
754	lcl|c223629_g2_i1|m.9258	236	5	10	4	5	6	7	13	15	11	9	7	0	8	5	6	5	8	10	-0.132	-0.7915	0.799661	0.652676	0.201817
755	lcl|c223629_g2_i2|m.9260	236	4	6	4	4	5	5	11	12	8	5	4	0	6	4	4	3	6	8	-0.203	-1.0565	0.238527	0.648225	0.031685
756	lcl|c223646_g1_i6|m.9275	756	0	0	1	1	0	1	1	1	0	0	0	0	0	0	0	0	0	0	-0.171	-0.403	1	0.57249	0.663737
757	lcl|c223654_g2_i2|m.9279	266	0	0	0	1	1	0	1	2	1	1	0	0	0	1	1	0	1	0	-0.057	-0.1523	0.988694	0.411114	0.797086
758	lcl|c223673_g1_i2|m.9291	296	0	0	3	6	2	1	1	0	1	0	0	0	1	0	1	0	0	0	0.006	0.0183	0.901791	0.256537	0.827424
759	lcl|c223673_g1_i3|m.9293	297	0	0	4	15	5	2	1	0	1	0	0	0	1	0	1	0	0	0	0.231	0.7478	0.014896	0.00121	0.728406
760	lcl|c223673_g1_i4|m.9295	168	0	1	2	4	2	1	1	0	1	0	0	0	1	0	1	0	0	0	-0.053	-0.1391	0.986036	0.39985	0.800847
761	lcl|c223673_g2_i1|m.9297	282	0	1	3	5	3	3	2	1	2	1	0	1	2	0	3	0	2	2	-0.245	-0.8196	0.744533	0.653458	0.172662
762	lcl|c223677_g1_i1|m.9303	216	3	5	10	8	7	6	11	7	8	6	4	5	8	4	9	8	9	12	-0.217	-1.341	0.020082	0.634847	0.0018
763	lcl|c223689_g4_i1|m.9313	123	2	5	5	7	4	6	7	8	7	4	1	6	3	5	3	0	2	5	0.195	0.8405	0.005532	0.000411	0.715173
764	lcl|c223710_g5_i3|m.9324	298	0	0	1	1	0	0	0	0	0	0	0	0	0	1	0	0	0	0	-0.143	-0.3557	1	0.550163	0.69973
765	lcl|c223711_g2_i5|m.9326	366	0	1	1	1	1	0	1	1	1	0	0	0	0	0	0	0	0	0	-0.115	-0.2859	1	0.510366	0.742607
766	lcl|c223716_g4_i1|m.9328	666	0	0	0	0	0	1	0	3	0	0	0	1	0	1	0	0	1	1	0.03	0.0742	0.837999	0.207178	0.829536
767	lcl|c223761_g4_i15|m.9358	290	0	0	0	0	0	1	0	0	0	1	0	1	0	0	0	0	0	0	-0.086	-0.2166	0.996452	0.462492	0.774854
768	lcl|c223761_g4_i7|m.9360	798	0	0	1	2	1	2	1	1	1	2	0	1	0	0	0	0	1	0	0.082	0.2116	0.604311	0.106815	0.821387
769	lcl|c223775_g7_i2|m.9373	242	0	0	0	2	3	3	1	4	0	1	1	0	2	4	3	3	5	4	0.106	0.3549	0.327866	0.043295	0.799208
770	lcl|c223794_g7_i1|m.9389	789	6	3	7	7	2	1	0	0	12	4	2	1	5	7	6	0	9	1	-0.746	-3.235	0	0.608099	0
771	lcl|c223798_g3_i1|m.9397	382	0	0	0	0	0	0	1	0	0	0	0	1	0	1	0	0	1	1	-0.15	-0.3702	1	0.557392	0.689331
772	lcl|c223808_g2_i1|m.9405	428	0	1	0	4	1	3	1	1	0	1	0	1	0	3	1	0	0	3	0.424	1.1763	6.8e-05	4e-06	0.679414
773	lcl|c223847_g2_i6|m.9428	447	0	0	1	0	1	2	0	1	0	0	0	0	0	0	0	1	1	1	-0.056	-0.1429	0.986885	0.403115	0.799791
774	lcl|c223856_g1_i2|m.9435	100	0	0	0	0	0	0	0	0	0	0	0	1	0	0	0	0	0	0	-0.111	-0.2791	1	0.506035	0.746199
775	lcl|c223865_g4_i2|m.9445	349	7	6	12	8	9	14	7	11	9	12	9	12	8	10	8	7	6	5	0.021	0.1389	0.739439	0.155445	0.827826
776	lcl|c223870_g1_i6|m.9447	557	16	33	27	26	23	32	26	46	26	27	13	17	17	19	15	15	20	19	0.126	1.2907	1.1e-05	1e-06	0.670237
777	lcl|c223901_g5_i2|m.9467	376	0	0	0	0	0	1	1	1	0	0	1	2	1	0	1	1	0	2	0.021	0.0547	0.862581	0.224012	0.829198
778	lcl|c223941_g1_i2|m.9485	692	0	5	3	4	3	7	7	9	2	6	4	4	5	4	1	5	4	7	0.403	1.7821	0	0	0.639922
779	lcl|c223971_g2_i1|m.9513	322	0	0	0	1	0	1	0	1	0	0	1	0	0	0	1	0	0	0	-0.087	-0.214	0.996327	0.460538	0.775888
780	lcl|c223975_g3_i3|m.9516	259	1	1	5	3	4	2	6	4	3	3	4	6	6	2	6	3	6	8	-0.313	-1.3485	0.018564	0.634534	0.001649
781	lcl|c223983_g2_i8|m.9524	310	1	2	1	1	1	1	2	4	0	1	0	0	0	0	0	0	0	1	0.066	0.1744	0.675831	0.130328	0.825215
782	lcl|c223990_g2_i1|m.9532	308	1	1	3	3	2	6	3	5	1	5	2	7	0	2	3	2	0	2	0.527	1.8566	0	0	0.636791
783	lcl|c224015_g2_i1|m.9549	138	0	0	2	1	2	1	1	1	1	1	1	1	1	1	1	1	2	1	-0.353	-0.9139	0.531382	0.653318	0.09519
784	lcl|c224026_g2_i1|m.9560	249	0	0	0	0	1	0	2	0	1	0	1	0	1	1	0	2	2	0	-0.177	-0.4703	1	0.59839	0.601703
785	lcl|c224026_g2_i4|m.9562	249	2	0	3	2	1	2	2	0	8	5	4	2	4	3	7	1	4	0	-0.694	-2.5589	0	0.610745	0
786	lcl|c224029_g4_i1|m.9563	590	29	32	38	47	45	52	47	42	40	45	41	40	45	49	48	44	44	38	-0.068	-0.9574	0.431646	0.652194	0.069764
787	lcl|c224042_g7_i2|m.9570	274	2	0	1	3	1	2	2	0	1	1	0	12	1	4	2	4	2	1	0.635	2.0506	0	0	0.630354
788	lcl|c224057_g7_i5|m.9575	394	0	0	0	0	1	1	1	0	0	0	0	0	0	0	0	1	0	0	-0.131	-0.3111	1	0.525708	0.728429
789	lcl|c224072_g3_i2|m.9582	215	0	0	0	0	0	0	0	0	0	0	0	0	0	0	0	0	0	0	-0.131	-0.3135	1	0.527111	0.727005
790	lcl|c224106_g1_i3|m.9604	305	0	0	0	0	0	0	1	0	0	0	0	0	0	0	0	0	0	0	-0.165	-0.4247	1	0.58156	0.645162
791	lcl|c224107_g2_i1|m.9605	529	1	1	0	0	0	0	0	1	0	0	0	1	0	0	0	0	0	1	-0.153	-0.3666	1	0.555629	0.691964
792	lcl|c224130_g1_i5|m.9625	239	0	0	1	1	1	0	1	2	0	0	1	0	0	0	1	0	1	1	-0.037	-0.0892	0.971456	0.355587	0.812807
793	lcl|c224156_g3_i2|m.9641	1123	4	14	11	16	11	4	14	8	10	7	16	5	19	12	8	8	19	14	-0.322	-2.2697	0	0.613743	0
794	lcl|c224182_g8_i1|m.9652	631	1	0	0	1	2	3	3	3	2	1	1	2	1	1	4	1	2	1	-0.303	-0.9515	0.444797	0.652375	0.072861
795	lcl|c224192_g2_i3|m.9656	326	0	0	0	0	0	0	0	0	0	0	0	0	0	0	0	0	0	0	-0.123	-0.2992	1	0.518602	0.735298
796	lcl|c224201_g3_i8|m.9658	130	26	25	34	60	47	63	41	67	34	62	29	27	32	50	32	36	40	43	0.204	2.8417	0	0	0.612255
797	lcl|c224226_g3_i3|m.9665	182	1	1	1	1	1	3	1	2	2	1	1	3	1	1	1	3	1	1	0.276	0.7907	0.009527	0.000742	0.722072
798	lcl|c224242_g3_i7|m.9677	306	1	0	3	2	2	4	2	2	2	2	3	3	2	4	3	3	3	2	-0.008	-0.027	0.938858	0.298237	0.823032
799	lcl|c224257_g2_i4|m.9682	236	5	2	4	6	5	7	5	4	7	4	2	4	5	6	3	2	6	5	-0.151	-0.6963	0.93711	0.646213	0.317588
800	lcl|c224260_g2_i3|m.9686	198	0	1	2	3	2	3	2	3	2	3	1	0	0	2	2	1	0	2	0.15	0.4863	0.14503	0.015651	0.774216
801	lcl|c224263_g3_i3|m.9691	911	4	10	7	10	11	12	7	12	3	9	5	10	6	7	4	7	4	10	0.423	2.4803	0	0	0.619491
802	lcl|c224289_g1_i1|m.9705	327	1	1	1	4	2	4	3	5	2	3	1	2	0	2	2	1	1	2	0.351	1.1145	0.000169	1e-05	0.684853
803	lcl|c224289_g3_i1|m.9708	110	0	0	0	0	0	0	0	0	0	0	0	0	0	0	0	0	0	0	-0.11	-0.2583	0.999151	0.492286	0.756589
804	lcl|c224310_g1_i1|m.9717	510	0	0	0	1	0	2	1	7	0	3	0	3	0	1	0	0	0	0	0.558	1.5531	0	0	0.652204
805	lcl|c224312_g2_i3|m.9718	851	0	2	17	12	14	16	12	13	0	0	10	20	3	2	11	8	17	12	-0.078	-0.4926	1	0.605592	0.578251
806	lcl|c224316_g4_i1|m.9731	145	0	0	0	0	0	0	0	0	0	0	0	0	0	0	0	0	0	0	-0.081	-0.1923	0.994328	0.443808	0.784052
807	lcl|c224332_g10_i1|m.9746	242	1	0	1	1	0	0	2	3	0	0	0	0	1	1	1	1	1	3	0.062	0.1659	0.691561	0.13611	0.825939
808	lcl|c224365_g3_i1|m.9762	317	0	0	1	0	2	1	1	1	0	0	0	0	0	1	1	1	1	1	-0.186	-0.4662	1	0.596994	0.605858
809	lcl|c224371_g5_i1|m.9765	103	0	1	0	0	1	0	0	2	1	0	0	0	1	0	0	1	0	0	-0.034	-0.0842	0.969538	0.351036	0.813816
810	lcl|c224405_g1_i1|m.9772	539	7	10	13	12	9	9	12	8	11	10	15	0	11	9	22	9	16	5	-0.548	-3.9987	0	0.605489	0
811	lcl|c224415_g2_i11|m.9780	138	0	1	0	2	0	1	0	1	0	2	0	0	0	1	0	0	0	0	0.038	0.091	0.814855	0.193089	0.829499
812	lcl|c224432_g1_i4|m.9787	279	27	25	38	43	34	42	30	40	26	37	21	26	30	31	30	29	22	35	0.061	0.7371	0.016602	0.001362	0.730043
813	lcl|c224456_g4_i3|m.9819	351	0	0	0	1	0	0	0	0	0	0	0	1	0	0	0	0	0	0	-0.111	-0.2627	0.999431	0.495257	0.754466
814	lcl|c224457_g1_i1|m.9820	448	5	5	4	4	7	9	9	10	9	7	13	3	8	6	2	1	4	7	-0.275	-1.4383	0.006911	0.631032	0.000551
815	lcl|c224457_g3_i2|m.9821	115	0	0	0	0	0	0	0	0	0	0	0	0	0	0	0	0	0	0	-0.115	-0.2678	0.999634	0.498658	0.751955
816	lcl|c224457_g3_i3|m.9822	116	0	0	0	0	0	0	0	0	0	0	0	0	0	0	0	0	0	0	-0.126	-0.2923	1	0.514368	0.739138
817	lcl|c224457_g4_i1|m.9823	207	0	0	0	0	0	1	1	1	0	1	0	1	0	0	0	0	0	0	-0.143	-0.3482	1	0.546287	0.704897
818	lcl|c224488_g1_i1|m.9847	546	3	8	6	7	4	6	4	7	3	8	5	7	3	5	7	8	2	5	0.367	1.8248	0	0	0.638075
819	lcl|c224493_g2_i5|m.9854	134	1	0	0	1	0	2	4	2	1	1	2	2	1	0	1	1	2	0	-0.192	-0.521	1	0.613862	0.546351
820	lcl|c224498_g4_i2|m.9859	324	0	0	3	1	1	1	1	3	0	2	1	3	2	3	2	3	3	1	0.069	0.2064	0.614555	0.109924	0.821984
821	lcl|c224520_g2_i6|m.9890	1035	0	0	1	1	1	1	2	1	1	0	0	1	0	0	0	0	0	0	-0.212	-0.5557	1	0.622698	0.504493
822	lcl|c224522_g3_i3|m.9891	404	0	0	1	0	1	0	0	0	1	1	0	0	0	0	0	1	0	0	-0.159	-0.3775	1	0.5609	0.683887
823	lcl|c224534_g1_i4|m.9895	223	1	0	0	0	1	2	1	2	0	1	1	2	0	0	1	0	1	0	0.145	0.3613	0.316842	0.041374	0.798039
824	lcl|c224539_g4_i1|m.9897	200	0	0	2	1	0	3	1	1	0	0	0	0	0	0	1	0	1	0	-0.067	-0.1619	0.990328	0.419165	0.794186
825	lcl|c224541_g6_i2|m.9899	194	0	0	1	0	0	0	0	0	0	0	0	0	0	0	0	0	0	0	-0.122	-0.2998	1	0.518966	0.73496
826	lcl|c224556_g6_i1|m.9931	209	3	4	7	5	9	6	8	8	6	6	13	4	4	1	7	6	0	0	-0.418	-2.0954	0	0.616143	0
827	lcl|c224557_g2_i1|m.9933	147	11	6	9	10	8	11	8	10	7	7	5	7	9	4	11	12	5	9	-0.055	-0.3321	1	0.537646	0.715515
828	lcl|c224583_g1_i1|m.9971	474	0	0	1	0	0	1	1	0	0	1	0	1	0	1	0	0	0	0	-0.112	-0.2786	1	0.505713	0.74646
829	lcl|c224589_g7_i1|m.9992	130	1	1	0	0	2	1	3	4	1	3	1	4	3	4	3	5	3	2	0.2	0.691	0.026115	0.002242	0.737354
830	lcl|c224591_g2_i4|m.9998	135	0	0	0	0	0	0	0	0	0	0	0	0	0	0	0	0	0	0	-0.077	-0.1929	0.994391	0.44428	0.783837
831	lcl|c224597_g3_i1|m.10003	179	1	2	4	5	4	4	4	3	2	4	5	1	3	5	4	2	4	5	-0.116	-0.4957	1	0.606543	0.574879
832	lcl|c224624_g2_i1|m.10023	207	6	6	6	10	5	7	7	7	5	11	7	8	4	6	7	3	7	6	0.072	0.4014	0.252464	0.030833	0.790539
833	lcl|c224624_g4_i1|m.10025	200	9	8	6	13	5	13	11	15	5	10	5	6	8	6	7	7	7	8	0.196	1.1709	7.3e-05	4e-06	0.679874
834	lcl|c224667_g2_i1|m.10051	215	1	1	2	2	1	2	1	1	0	1	1	0	0	1	1	1	2	3	0.029	0.0781	0.832813	0.203871	0.829554
835	lcl|c224670_g2_i1|m.10052	715	0	0	0	0	0	0	0	0	0	0	0	0	0	0	0	0	0	0	-0.119	-0.3021	1	0.520356	0.733653
836	lcl|c224672_g1_i1|m.10055	661	11	22	22	15	14	15	11	11	13	14	10	11	15	16	17	18	11	17	0.006	0.0484	0.870008	0.229548	0.828999
837	lcl|c224672_g2_i1|m.10058	617	34	70	75	76	57	88	62	74	51	76	62	49	66	71	50	91	64	83	0.16	2.742	0	0	0.613886
838	lcl|c224694_g1_i1|m.10068	192	3	5	7	10	3	7	6	10	4	8	3	2	7	5	2	5	6	7	0.217	1.135	0.000125	7e-06	0.683005
839	lcl|c224713_g2_i1|m.10075	309	1	0	1	4	0	1	4	5	4	2	2	3	2	4	6	1	4	3	-0.128	-0.4772	1	0.600687	0.5946
840	lcl|c224781_g7_i2|m.10124	141	0	0	1	1	0	0	1	1	1	0	1	1	1	1	1	0	0	1	-0.13	-0.2989	1	0.518419	0.735467
841	lcl|c224805_g7_i4|m.10145	216	0	0	0	0	0	0	0	0	0	0	0	0	0	0	0	0	0	0	-0.074	-0.1789	0.992708	0.433111	0.788701
842	lcl|c224811_g1_i3|m.10150	228	2	2	2	0	1	1	3	3	1	3	2	3	0	1	2	1	1	1	-0.024	-0.0716	0.96412	0.339501	0.816211
843	lcl|c224812_g3_i3|m.10152	146	0	0	0	0	1	1	0	1	0	0	0	0	0	0	0	0	0	0	-0.116	-0.2645	0.999483	0.496462	0.753585
844	lcl|c224826_g3_i1|m.10162	244	1	2	0	1	1	1	1	0	2	1	2	1	1	1	0	1	0	2	-0.116	-0.3089	1	0.524412	0.729723
845	lcl|c224835_g5_i2|m.10167	156	3	5	5	7	7	6	11	7	6	6	10	13	8	8	10	11	11	12	-0.014	-0.0848	0.969777	0.351583	0.813697
846	lcl|c224848_g2_i1|m.10169	247	1	2	3	5	3	4	2	5	2	6	2	6	1	2	3	2	4	4	0.401	1.4721	0	0	0.657378
847	lcl|c224848_g3_i5|m.10172	253	7	14	7	10	7	7	5	5	12	9	3	0	11	11	8	4	9	9	-0.114	-0.6956	0.937818	0.646141	0.318511
848	lcl|c224866_g1_i2|m.10191	310	1	3	9	9	14	11	0	0	5	5	2	0	6	2	6	6	9	6	-0.298	-1.4945	0.003568	0.629072	0.000265
849	lcl|c224867_g5_i1|m.10192	1064	0	0	0	0	0	2	0	0	0	0	0	0	0	1	0	0	0	0	-0.053	-0.1366	0.985505	0.397693	0.80153
850	lcl|c224876_g2_i1|m.10201	538	0	0	0	0	0	0	0	1	0	0	0	0	0	1	0	0	0	0	-0.127	-0.3031	1	0.520958	0.733082
851	lcl|c224880_g4_i1|m.10208	327	1	0	1	2	1	2	2	2	1	2	1	2	1	1	0	1	0	1	0.155	0.4182	0.228014	0.027123	0.787333
852	lcl|c224918_g1_i1|m.10239	245	14	12	10	13	10	10	7	9	11	9	16	9	14	7	11	9	11	7	-0.29	-2.1371	0	0.615533	0
853	lcl|c224995_g6_i2|m.10289	378	2	0	0	2	0	2	1	2	1	1	1	4	0	1	1	2	2	4	0.369	1.0933	0.000228	1.4e-05	0.686813
854	lcl|c225009_g5_i8|m.10303	226	0	1	0	0	0	0	0	0	1	0	0	1	1	0	0	0	0	1	-0.122	-0.2869	1	0.510996	0.742071
855	lcl|c225015_g2_i1|m.10306	238	4	2	3	2	4	5	3	3	2	3	3	2	3	3	4	3	2	2	-0.204	-0.7913	0.80004	0.652669	0.202034
856	lcl|c225023_g2_i13|m.10316	423	0	0	0	0	0	1	0	0	0	0	0	0	0	0	0	0	0	0	-0.108	-0.2538	0.998936	0.489213	0.758721
857	lcl|c225079_g1_i6|m.10351	576	3	4	2	5	3	3	4	3	4	3	2	3	4	4	3	4	3	4	0.05	0.2124	0.602735	0.106342	0.821293
858	lcl|c225098_g3_i9|m.10362	470	0	0	0	0	0	1	0	0	0	0	0	0	0	0	0	0	0	0	-0.135	-0.3211	1	0.531488	0.722408
859	lcl|c225110_g1_i1|m.10369	318	0	0	0	0	0	0	0	0	0	0	0	0	0	0	0	0	0	0	-0.158	-0.3881	1	0.565843	0.675728
860	lcl|c225112_g3_i3|m.10371	453	0	1	0	0	0	0	1	0	0	1	0	0	0	0	0	1	1	1	-0.166	-0.4022	1	0.572142	0.664397
861	lcl|c225115_g3_i4|m.10375	479	0	1	1	2	1	1	0	1	1	1	0	2	1	1	0	0	0	0	0.048	0.1208	0.769468	0.169194	0.828721
862	lcl|c225132_g1_i3|m.10387	308	0	1	0	1	0	0	1	1	0	2	0	0	0	1	0	0	1	0	-0.046	-0.112	0.979202	0.376103	0.807775
863	lcl|c225136_g5_i9|m.10397	406	0	0	2	4	0	3	0	0	0	2	1	0	0	1	0	0	1	3	0.343	0.9622	0.001309	8.7e-05	0.700248
864	lcl|c225144_g2_i3|m.10400	439	3	5	8	7	8	7	6	5	5	5	3	3	5	5	4	4	3	4	-0.118	-0.5842	0.999988	0.629	0.468055
865	lcl|c225156_g8_i5|m.10409	484	0	0	0	0	0	0	0	2	0	0	0	3	1	1	0	1	1	1	0.087	0.227	0.573852	0.09795	0.819512
866	lcl|c225168_g2_i4|m.10419	182	0	0	0	0	0	0	0	0	0	0	0	0	0	0	0	0	0	0	-0.114	-0.2719	0.999911	0.501361	0.749898
867	lcl|c225172_g3_i1|m.10424	337	3	5	10	8	2	2	1	2	5	9	6	2	9	10	2	2	3	4	-0.057	-0.272	0.999915	0.501426	0.749847
868	lcl|c225214_g2_i5|m.10448	441	0	1	1	2	1	0	1	0	1	2	1	1	1	0	2	0	1	1	-0.089	-0.227	0.997197	0.470196	0.770603
869	lcl|c225222_g1_i4|m.10453	263	0	0	0	1	1	1	2	0	0	0	1	0	0	0	1	1	2	0	-0.266	-0.6661	0.964015	0.642709	0.357937
870	lcl|c225236_g1_i2|m.10460	268	1	2	0	3	0	3	2	1	0	1	6	5	1	3	5	2	2	1	0.006	0.0187	0.901409	0.256174	0.827452
871	lcl|c225245_g1_i2|m.10472	322	0	1	0	0	0	0	0	0	0	0	0	0	0	0	0	0	0	0	-0.118	-0.2936	1	0.515172	0.738422
872	lcl|c225266_g1_i7|m.10481	657	0	1	0	1	1	3	2	2	0	3	0	0	0	0	0	0	1	1	0.111	0.2962	0.436377	0.064338	0.809389
873	lcl|c225267_g2_i1|m.10483	272	0	0	0	0	0	0	0	1	0	0	0	1	0	0	0	0	0	0	-0.126	-0.2966	1	0.517016	0.736757
874	lcl|c225281_g3_i2|m.10487	267	1	3	1	3	2	4	4	1	2	1	2	4	3	2	3	3	3	2	-0.027	-0.0983	0.974759	0.363825	0.810884
875	lcl|c225308_g1_i1|m.10501	117	8	6	8	9	4	5	5	7	4	9	5	5	8	14	4	11	7	8	0.217	1.1548	9.3e-05	5e-06	0.681262
876	lcl|c225308_g1_i4|m.10503	111	3	4	5	6	1	3	2	2	2	5	1	4	5	8	1	7	3	5	0.509	2.09	0	0	0.62926
877	lcl|c225316_g3_i2|m.10516	126	3	4	3	4	4	7	3	6	3	5	1	2	0	3	0	0	1	3	0.38	1.4436	1e-06	0	0.659283
878	lcl|c225323_g2_i2|m.10522	252	7	23	18	22	19	29	23	22	20	20	21	13	18	18	13	19	14	20	0.085	0.8012	0.008514	0.000657	0.720577
879	lcl|c225328_g5_i5|m.10528	302	0	2	2	2	2	1	1	2	0	1	4	3	0	1	2	0	2	1	-0.196	-0.6102	0.995797	0.634057	0.433563
880	lcl|c225334_g2_i2|m.10532	199	0	0	0	0	0	0	0	0	0	0	0	0	0	0	0	1	0	0	-0.108	-0.2784	1	0.505584	0.746564
881	lcl|c225352_g1_i1|m.10544	333	35	69	36	71	46	51	48	67	41	53	33	59	51	52	36	61	42	76	0.31	4.6906	0	0	0.602765
882	lcl|c225359_g3_i1|m.10554	224	0	0	1	3	0	1	0	0	0	1	0	1	0	0	1	0	0	1	0.016	0.0404	0.879034	0.23664	0.828682
883	lcl|c225365_g4_i1|m.10559	301	0	0	0	0	0	0	0	0	0	0	0	0	0	2	0	2	1	0	0.032	0.0794	0.83106	0.202773	0.829556
884	lcl|c225394_g4_i2|m.10584	194	6	9	8	10	9	15	8	12	11	10	11	11	13	10	13	9	15	10	-0.067	-0.4548	1	0.592995	0.617154
885	lcl|c225423_g3_i2|m.10600	769	0	6	3	4	2	7	3	5	4	4	1	3	2	1	2	5	2	2	0.455	1.6679	0	0	0.645565
886	lcl|c225454_g1_i1|m.10641	1097	0	0	0	0	0	0	0	1	0	0	0	0	0	0	0	0	0	0	-0.154	-0.3786	1	0.561422	0.683055
887	lcl|c225457_g2_i2|m.10643	1084	0	0	0	0	0	0	0	0	0	0	0	0	1	1	0	0	0	1	-0.126	-0.3114	1	0.525883	0.728252
888	lcl|c225471_g2_i2|m.10654	631	15	16	21	31	19	39	27	47	18	37	26	29	19	38	30	29	27	38	0.314	3.4328	0	0	0.607097
889	lcl|c225475_g3_i6|m.10661	310	0	0	0	0	0	0	0	1	0	0	0	1	0	1	0	0	0	0	-0.152	-0.3598	1	0.552242	0.696845
890	lcl|c225478_g2_i2|m.10668	898	0	0	0	0	0	0	0	1	0	1	0	0	0	0	0	3	0	1	-0.012	-0.0295	0.940543	0.300556	0.822716
891	lcl|c225497_g2_i1|m.10682	209	1	1	0	1	0	0	0	0	1	1	1	2	1	1	1	1	1	1	-0.025	-0.061	0.959012	0.329738	0.818064
892	lcl|c225556_g1_i1|m.10729	286	0	1	0	1	0	0	0	0	0	0	0	2	0	0	0	0	0	2	0.058	0.1522	0.716245	0.145739	0.826976
893	lcl|c225557_g1_i1|m.10731	325	0	0	0	0	0	0	0	0	0	0	0	0	0	0	1	0	0	0	-0.134	-0.3538	1	0.54919	0.701052
894	lcl|c225590_g2_i4|m.10752	336	3	4	5	8	5	4	5	8	4	6	4	6	6	5	4	3	5	10	0.157	0.7917	0.009426	0.000734	0.721929
895	lcl|c225618_g2_i6|m.10783	517	9	9	18	20	14	26	16	25	15	20	12	11	9	15	15	10	12	15	0.116	0.9403	0.001717	0.000116	0.702743
896	lcl|c225632_g3_i1|m.10790	867	4	5	10	15	12	21	11	22	7	12	12	14	8	18	18	14	10	18	0.301	2.2189	0	0	0.625918
897	lcl|c225637_g3_i2|m.10796	589	0	0	0	0	0	0	0	0	0	0	0	0	0	1	0	0	0	2	-0.076	-0.1887	0.993874	0.44096	0.78533
898	lcl|c225668_g5_i2|m.10809	209	5	8	5	8	5	5	8	11	3	10	3	0	4	7	5	6	5	7	0.259	1.3506	4e-06	0	0.665792
899	lcl|c225713_g4_i1|m.10851	411	0	2	0	0	3	3	1	4	2	1	1	1	1	1	2	1	1	1	-0.053	-0.1506	0.988365	0.409675	0.797585
900	lcl|c225728_g4_i1|m.10879	216	0	1	0	0	0	0	0	0	0	0	0	0	0	0	0	2	0	0	0	0.0008	0.917593	0.272543	0.826022
901	lcl|c225747_g4_i14|m.10902	729	0	0	0	0	0	0	1	0	0	0	0	0	0	0	0	0	0	0	-0.153	-0.3731	1	0.558796	0.687185
902	lcl|c225753_g2_i5|m.10911	182	0	0	1	1	0	1	0	1	1	0	1	0	1	0	1	1	1	0	-0.12	-0.2874	1	0.51131	0.741802
903	lcl|c225755_g1_i1|m.10912	343	0	0	0	1	0	0	0	0	0	0	0	0	0	0	0	0	0	0	-0.124	-0.2969	1	0.5172	0.736589
904	lcl|c225756_g1_i2|m.10914	306	0	12	3	49	12	38	3	37	2	19	6	11	0	16	2	20	2	33	1.842	10.6072	0	0	0.599252
905	lcl|c225761_g4_i1|m.10923	163	0	1	0	0	0	0	0	0	0	0	0	1	0	0	0	0	0	0	-0.138	-0.3262	1	0.534369	0.719248
906	lcl|c225761_g6_i1|m.10925	326	10	9	10	10	9	9	10	8	8	8	5	5	8	8	7	8	11	9	-0.154	-0.9801	0.382195	0.651424	0.058802
907	lcl|c225775_g7_i7|m.10937	196	5	6	9	9	10	12	5	18	11	17	14	14	12	14	9	14	16	21	0.22	1.568	0	0	0.651293
908	lcl|c225782_g2_i1|m.10939	122	0	0	0	0	0	0	0	0	0	0	0	0	0	0	0	0	0	0	-0.108	-0.2662	0.999499	0.497596	0.752748
909	lcl|c225820_g10_i1|m.10972	120	0	0	0	1	1	1	0	1	1	0	0	0	0	0	0	1	0	2	-0.059	-0.1516	0.988562	0.410522	0.797292
910	lcl|c225822_g2_i4|m.10975	295	0	3	1	2	2	2	1	2	1	2	0	6	0	1	0	0	0	2	0.515	1.5073	0	0	0.655085
911	lcl|c225829_g1_i1|m.10978	137	25	27	30	30	32	33	37	29	31	32	43	25	46	38	37	39	42	43	-0.173	-2.0973	0	0.616115	0
912	lcl|c225844_g2_i3|m.10984	292	4	10	3	11	6	9	6	7	3	9	6	1	3	8	5	8	5	6	0.406	2.2448	0	0	0.62527
913	lcl|c225845_g2_i3|m.10985	196	0	0	0	0	0	0	0	0	0	0	1	0	0	0	0	1	0	0	-0.15	-0.3576	1	0.55113	0.698399
914	lcl|c225849_g2_i3|m.10990	429	0	1	3	3	3	3	0	4	2	5	2	2	1	2	2	7	0	0	0.381	1.3456	4e-06	0	0.666155
915	lcl|c225852_g2_i3|m.10992	292	0	0	0	0	2	1	0	0	0	0	1	0	0	1	0	0	1	0	-0.215	-0.5392	1	0.618663	0.524769
916	lcl|c225858_g7_i1|m.10995	113	0	0	0	1	0	0	0	0	0	0	1	0	0	0	0	0	0	0	-0.149	-0.3597	1	0.552192	0.696916
917	lcl|c225867_g3_i1|m.11000	208	0	0	1	0	0	0	0	4	0	2	1	0	0	0	0	0	1	0	0.194	0.5075	0.124392	0.01306	0.770153
918	lcl|c225875_g4_i2|m.11006	204	2	5	4	6	3	6	1	5	3	3	2	3	4	3	5	5	1	3	0.326	1.2837	1.2e-05	1e-06	0.670771
919	lcl|c225931_g4_i1|m.11061	108	1	0	3	2	1	3	2	1	0	2	1	1	1	1	3	3	0	0	-0.032	-0.0924	0.972696	0.358491	0.812144
920	lcl|c225938_g3_i1|m.11067	223	0	0	0	0	0	0	0	0	0	0	0	0	1	1	1	1	1	2	-0.038	-0.0929	0.972882	0.358944	0.812039
921	lcl|c225972_g1_i1|m.11091	360	67	79	100	95	77	92	115	104	80	89	91	100	84	91	109	106	92	92	-0.058	-1.209	0.071962	0.640824	0.0076
922	lcl|c226005_g4_i1|m.11126	287	0	1	0	0	0	0	0	2	0	2	6	4	0	0	2	2	0	0	-0.041	-0.1175	0.980741	0.380984	0.806453
923	lcl|c226009_g3_i5|m.11131	932	1	1	7	7	1	4	0	6	0	5	0	2	1	6	1	1	1	7	0.742	2.6106	0	0	0.616501
924	lcl|c226046_g1_i2|m.11150	502	4	13	11	11	7	12	12	18	15	13	10	16	18	14	12	21	14	20	0.191	1.4057	1e-06	0	0.661881
925	lcl|c226079_g3_i1|m.11186	256	1	2	5	3	3	3	3	4	4	3	4	4	4	5	4	3	5	3	-0.183	-0.774	0.830892	0.651954	0.221283
926	lcl|c226079_g3_i2|m.11188	354	1	5	6	7	3	6	5	4	2	4	3	4	5	6	4	5	7	5	0.121	0.5602	0.082833	0.008161	0.760226
927	lcl|c226084_g3_i2|m.11194	197	1	1	1	2	1	2	2	2	1	1	1	3	1	2	2	2	2	1	0.156	0.4339	0.206588	0.023996	0.784318
928	lcl|c226094_g1_i1|m.11204	114	0	0	0	2	0	2	4	2	0	2	1	0	0	0	0	0	0	0	-0.054	-0.1484	0.987896	0.407808	0.798224
929	lcl|c226099_g2_i1|m.11211	597	0	0	1	0	0	1	1	1	0	0	0	0	1	0	1	1	1	3	-0.004	-0.0098	0.926241	0.282313	0.824993
930	lcl|c226115_g1_i8|m.11228	483	0	1	0	0	1	0	0	0	0	2	0	0	0	0	0	0	0	0	-0.046	-0.1139	0.979764	0.377792	0.807323
931	lcl|c226138_g1_i1|m.11235	281	0	0	0	0	1	1	0	1	0	0	0	0	0	0	0	0	0	0	-0.095	-0.2329	0.99771	0.474488	0.768104
932	lcl|c226138_g2_i1|m.11236	129	2	2	3	2	2	3	2	3	2	2	2	2	2	1	2	0	2	1	-0.231	-0.7304	0.897365	0.649278	0.273623
933	lcl|c226146_g2_i7|m.11244	623	0	0	0	0	0	0	4	1	1	3	1	1	3	5	5	4	2	4	-0.015	-0.0515	0.953985	0.320955	0.8196
934	lcl|c226155_g2_i3|m.11249	584	0	0	3	2	1	1	1	0	0	0	0	1	0	1	2	1	0	0	-0.299	-0.7683	0.840605	0.651677	0.227828
935	lcl|c226156_g7_i2|m.11251	127	0	0	1	4	1	0	2	0	0	0	0	0	0	0	1	0	0	0	0.05	0.1295	0.755259	0.16251	0.828329
936	lcl|c226189_g2_i2|m.11277	115	1	1	0	0	0	0	3	1	2	1	1	4	1	1	0	2	1	1	-0.036	-0.1009	0.975679	0.366167	0.810314
937	lcl|c226194_g1_i2|m.11280	483	0	0	0	1	1	1	1	2	0	0	0	0	0	1	0	0	0	0	-0.018	-0.0477	0.951841	0.317435	0.820182
938	lcl|c226194_g1_i2|m.11281	228	0	1	0	0	0	0	0	1	0	1	0	0	0	0	0	0	0	0	-0.155	-0.4027	1	0.572359	0.663985
939	lcl|c226211_g2_i1|m.11296	245	1	1	0	0	0	0	0	0	2	1	1	0	1	2	0	0	1	1	-0.085	-0.2155	0.996408	0.461667	0.775293
940	lcl|c226212_g1_i3|m.11297	389	0	0	0	0	1	1	0	0	0	0	0	0	0	0	0	1	1	3	0.038	0.0953	0.808629	0.189551	0.829442
941	lcl|c226216_g1_i2|m.11298	323	8	12	12	15	14	13	14	16	15	16	16	16	19	17	14	14	13	16	-0.017	-0.1462	0.987509	0.405935	0.798856
942	lcl|c226230_g2_i2|m.11305	377	2	3	2	5	2	5	5	5	5	4	3	4	1	5	3	5	2	4	0.344	1.4931	0	0	0.656002
943	lcl|c226263_g3_i5|m.11341	133	0	0	0	0	0	0	1	1	0	0	2	1	0	0	0	1	0	2	-0.082	-0.2102	0.996013	0.457663	0.777376
944	lcl|c226269_g1_i6|m.11347	410	0	0	0	0	0	0	0	0	0	0	0	2	0	1	0	0	0	0	-0.038	-0.0963	0.974092	0.36202	0.811316
945	lcl|c226287_g1_i1|m.11356	285	3	4	6	7	4	10	5	9	3	8	7	9	8	8	3	5	6	9	0.312	1.6805	0	0	0.644893
946	lcl|c226287_g1_i2|m.11357	294	3	3	5	5	3	8	4	8	3	8	5	4	7	7	3	6	6	9	0.293	1.4216	1e-06	0	0.660782
947	lcl|c226291_g5_i2|m.11359	336	0	1	0	1	1	1	1	1	1	1	1	0	1	1	0	0	1	0	-0.142	-0.3408	1	0.54237	0.709856
948	lcl|c226295_g1_i9|m.11377	607	0	0	0	0	0	0	0	0	0	0	0	1	0	0	0	0	0	1	-0.158	-0.3837	1	0.563813	0.679151
949	lcl|c226303_g1_i2|m.11380	882	0	0	0	0	0	0	0	0	0	0	1	0	1	0	1	0	1	0	-0.159	-0.3975	1	0.570076	0.668235
950	lcl|c226307_g4_i3|m.11386	388	1	0	0	1	0	1	0	0	0	0	0	0	0	0	0	0	0	0	-0.144	-0.3744	1	0.559421	0.686216
951	lcl|c226344_g7_i1|m.11422	382	0	1	0	2	1	2	3	4	1	3	0	2	1	1	1	2	1	2	0.312	0.9061	0.002596	0.000181	0.706801
952	lcl|c226346_g1_i1|m.11426	227	0	3	1	3	1	2	1	3	1	4	1	4	1	4	3	4	1	4	0.767	2.4218	0	0	0.620905
953	lcl|c226389_g3_i1|m.11454	429	0	1	2	2	2	3	3	1	2	2	2	1	1	3	3	1	4	2	-0.297	-0.9498	0.448643	0.652426	0.073774
954	lcl|c226409_g2_i1|m.11459	423	0	1	1	2	0	1	1	3	0	3	4	4	1	3	1	1	3	5	0.339	1.0928	0.00023	1.4e-05	0.68686
955	lcl|c226414_g3_i1|m.11460	158	11	10	10	10	11	10	12	11	15	11	10	12	15	14	12	11	14	14	-0.165	-1.2249	0.062396	0.640063	0.006454
956	lcl|c226450_g3_i4|m.11486	231	11	14	17	20	15	20	19	18	14	17	14	16	13	13	13	13	12	13	0.016	0.132	0.751068	0.160614	0.828203
957	lcl|c226454_g2_i17|m.11487	261	0	4	3	1	1	2	1	1	3	2	1	0	1	0	1	3	1	3	0.137	0.4289	0.213255	0.024958	0.78528
958	lcl|c226454_g2_i2|m.11493	433	0	2	1	1	2	3	1	1	3	1	1	1	1	0	1	3	1	2	0.037	0.1097	0.78701	0.17792	0.829114
959	lcl|c226459_g4_i1|m.11502	247	0	0	0	0	0	0	0	0	0	0	0	0	0	1	0	0	0	0	-0.135	-0.3192	1	0.530403	0.72357
960	lcl|c226478_g2_i1|m.11529	625	0	1	0	0	0	0	0	1	1	0	1	0	0	0	0	0	0	0	-0.155	-0.3791	1	0.561658	0.682675
961	lcl|c226496_g1_i2|m.11534	122	1	3	2	1	2	1	1	1	2	0	0	0	2	1	1	2	0	0	-0.187	-0.5277	1	0.615673	0.538506
962	lcl|c226505_g3_i2|m.11536	906	0	0	1	3	1	2	1	1	0	0	0	2	0	1	0	0	1	2	0.213	0.5665	0.078719	0.0077	0.759061
963	lcl|c226513_g6_i2|m.11548	473	0	1	0	1	0	1	0	1	0	1	0	0	0	0	0	0	1	0	-0.145	-0.3614	1	0.553046	0.695707
964	lcl|c226592_g1_i2|m.11602	1166	0	0	1	2	0	0	0	0	1	1	0	0	0	1	0	0	1	1	-0.082	-0.2057	0.995582	0.454227	0.779105
965	lcl|c226593_g2_i1|m.11607	266	2	4	3	4	2	2	5	4	4	2	3	2	1	3	1	3	2	5	0.091	0.3234	0.384565	0.053791	0.804809
966	lcl|c226607_g5_i2|m.11621	132	0	0	1	0	0	1	0	1	0	0	0	1	0	1	0	0	1	4	0.136	0.3432	0.348445	0.046987	0.80132
967	lcl|c226613_g4_i1|m.11622	313	2	2	5	2	3	4	7	6	3	4	1	5	4	5	2	3	5	5	0.016	0.0649	0.850034	0.215146	0.829427
968	lcl|c226629_g1_i3|m.11641	324	0	0	0	1	0	1	1	2	0	1	0	2	1	2	0	1	0	2	0.19	0.5005	0.130945	0.013871	0.771492
969	lcl|c226683_g4_i10|m.11705	123	0	0	0	0	0	1	0	2	0	0	0	0	0	1	0	0	0	0	-0.016	-0.0376	0.945795	0.30807	0.82164
970	lcl|c226705_g1_i7|m.11718	239	0	0	0	0	1	0	0	0	0	0	0	0	0	0	0	0	0	0	-0.129	-0.2985	1	0.518176	0.735693
971	lcl|c226705_g1_i7|m.11719	221	0	0	0	0	0	0	0	0	0	0	0	0	0	0	0	0	0	0	-0.109	-0.2753	0.999999	0.503579	0.748164
972	lcl|c226715_g5_i2|m.11728	472	3	4	5	7	8	6	4	6	6	11	4	8	1	5	1	5	2	5	0.392	1.8404	0	0	0.637436
973	lcl|c226723_g5_i2|m.11731	155	12	19	18	18	18	17	13	18	14	20	17	5	11	20	14	23	15	24	0.104	0.8838	0.003375	0.00024	0.709559
974	lcl|c226739_g4_i2|m.11743	391	0	1	0	1	1	1	0	2	1	0	1	2	1	2	0	3	0	1	0.213	0.5647	0.079878	0.007829	0.759393
975	lcl|c226762_g1_i2|m.11760	582	0	0	0	0	0	1	0	0	0	0	0	0	0	0	0	0	0	0	-0.16	-0.3824	1	0.563207	0.680153
976	lcl|c226769_g3_i1|m.11767	455	27	30	42	39	40	48	34	44	36	38	39	32	39	39	40	36	36	42	-0.058	-0.7524	0.865924	0.650792	0.246579
977	lcl|c226774_g3_i2|m.11777	149	3	4	12	13	8	13	11	18	3	15	10	8	4	7	8	9	8	9	0.244	1.6302	0	0	0.647646
978	lcl|c226786_g3_i2|m.11789	1082	0	0	0	0	0	0	0	0	0	0	0	1	0	0	0	0	0	0	-0.134	-0.3247	1	0.533526	0.720183
979	lcl|c226799_g3_i10|m.11796	368	0	2	0	0	0	0	0	2	0	2	2	0	0	3	2	1	0	0	0.103	0.2739	0.480165	0.074078	0.812918
980	lcl|c226873_g1_i5|m.11881	127	1	0	0	0	0	0	1	0	0	1	0	1	0	0	0	1	3	0	-0.252	-0.6341	0.984792	0.638117	0.401295
981	lcl|c226898_g4_i1|m.11913	135	0	0	0	1	0	1	1	1	0	1	1	1	0	0	1	1	1	0	-0.127	-0.2956	1	0.516403	0.737314
982	lcl|c226903_g2_i4|m.11918	104	1	1	1	2	1	4	4	3	3	4	2	2	1	4	3	1	2	1	0.081	0.2856	0.45708	0.068842	0.811094
983	lcl|c226904_g2_i1|m.11919	231	0	2	1	2	1	2	1	1	1	1	1	2	2	3	1	2	2	1	0.188	0.5578	0.084445	0.008342	0.760671
984	lcl|c226917_g1_i2|m.11940	524	0	2	0	2	1	2	1	2	0	2	0	0	0	1	1	0	0	1	0.207	0.5495	0.090217	0.008999	0.762216
985	lcl|c226971_g4_i11|m.11980	176	1	0	1	1	1	0	1	1	1	1	0	0	1	1	1	1	0	0	-0.114	-0.2743	0.999986	0.502929	0.748677
986	lcl|c226971_g4_i9|m.11985	796	2	2	3	3	4	6	6	5	2	5	5	5	1	3	5	6	7	9	0.107	0.4893	0.141964	0.01526	0.77364
987	lcl|c226978_g9_i3|m.11996	123	11	7	17	15	14	14	13	7	14	15	25	14	11	10	16	14	17	12	-0.325	-2.5596	0	0.610739	0
988	lcl|c226990_g1_i2|m.12024	171	2	7	3	9	3	6	4	7	2	5	5	2	4	4	2	5	4	5	0.402	1.7722	0	0	0.640371
989	lcl|c226999_g3_i5|m.12032	898	0	0	1	1	0	1	0	0	0	1	1	0	1	0	1	1	0	0	-0.137	-0.3449	1	0.544551	0.707125
990	lcl|c227009_g2_i1|m.12051	199	0	0	0	1	0	1	2	1	0	1	0	2	0	1	0	0	0	0	-0.11	-0.2851	1	0.509861	0.743035
991	lcl|c227059_g2_i7|m.12097	741	0	1	0	0	0	0	0	0	1	0	0	0	0	0	0	0	0	0	-0.141	-0.3428	1	0.543438	0.708529
992	lcl|c227063_g4_i1|m.12098	270	0	0	2	0	1	1	0	0	0	0	2	1	1	1	3	0	4	1	-0.571	-1.6293	0.00064	0.625061	4e-05
993	lcl|c227069_g2_i12|m.12102	771	32	46	35	46	29	47	48	48	25	56	28	29	50	46	27	44	44	45	0.131	1.7624	0	0	0.640822
994	lcl|c227069_g2_i9|m.12105	269	8	24	13	19	11	20	18	17	11	23	6	6	18	14	9	12	16	12	0.172	1.338	5e-06	0	0.66671
995	lcl|c227073_g3_i1|m.12111	216	0	0	1	1	1	1	1	0	1	0	0	0	0	0	0	0	0	1	-0.145	-0.3343	1	0.538853	0.714101
996	lcl|c227080_g2_i3|m.12113	177	0	0	2	1	0	0	0	0	0	0	0	0	0	0	0	0	0	0	-0.144	-0.3751	1	0.559756	0.685692
997	lcl|c227084_g3_i4|m.12132	229	1	1	1	0	2	1	2	1	2	2	2	2	2	2	4	3	1	1	-0.258	-0.7397	0.884645	0.64996	0.262046
998	lcl|c227092_g1_i4|m.12141	286	0	0	0	0	0	0	0	1	0	0	0	1	0	0	0	1	0	0	-0.132	-0.3327	1	0.537976	0.71513
999	lcl|c227108_g1_i3|m.12161	253	0	1	1	2	0	0	1	4	1	6	0	3	0	3	0	1	0	8	0.863	2.5947	0	0	0.616849
1000	lcl|c227111_g4_i1|m.12165	326	0	1	1	2	1	2	2	2	0	2	0	0	0	0	1	0	0	0	0.108	0.2871	0.454132	0.068191	0.810856
1001	lcl|c227122_g2_i2|m.12178	239	0	0	0	0	0	0	0	0	0	0	0	1	0	0	0	0	0	0	-0.139	-0.3411	1	0.542531	0.709658
1002	lcl|c227129_g2_i15|m.12185	454	8	5	5	15	12	13	14	21	10	14	17	13	9	20	11	16	7	24	0.315	2.4945	0	0	0.619153
1003	lcl|c227136_g2_i8|m.12192	264	3	9	6	8	4	9	4	12	6	13	2	3	9	18	4	7	8	11	0.521	3.0344	0	0	0.609935
1004	lcl|c227168_g5_i1|m.12205	387	0	1	1	2	3	4	0	4	0	4	0	0	0	0	1	0	2	1	0.271	0.7899	0.009608	0.000749	0.722187
1005	lcl|c227180_g1_i4|m.12217	506	0	0	0	0	0	0	0	0	0	0	0	1	0	1	0	0	0	0	-0.145	-0.3603	1	0.552494	0.69649
1006	lcl|c227186_g4_i4|m.12220	263	0	1	4	0	1	3	0	1	1	1	1	1	4	2	0	10	0	0	0.203	0.6347	0.04398	0.003996	0.746835
1007	lcl|c227188_g1_i1|m.12222	183	8	8	5	10	10	14	6	9	9	8	5	5	5	10	13	9	8	9	0.056	0.3479	0.340101	0.045475	0.800476
1008	lcl|c227188_g1_i3|m.12224	232	2	4	7	3	4	7	5	6	6	4	2	2	4	4	7	2	4	2	-0.305	-1.423	0.008228	0.631596	0.000668
1009	lcl|c227202_g1_i3|m.12234	172	0	0	1	1	1	3	1	2	0	1	0	2	0	1	1	1	1	1	0.228	0.5515	0.0888	0.008837	0.761843
1010	lcl|c227206_g2_i7|m.12247	460	4	4	5	6	6	5	4	7	4	5	5	6	3	4	5	4	5	5	0	0.0002	0.918103	0.273095	0.825967
1011	lcl|c227210_g4_i5|m.12253	854	0	0	1	1	0	1	0	2	0	1	0	0	0	0	0	0	1	1	-0.097	-0.2485	0.998614	0.485549	0.76118
1012	lcl|c227266_g1_i1|m.12288	250	0	2	2	2	2	6	4	5	0	2	2	1	0	0	1	1	3	1	0.051	0.1689	0.686058	0.134052	0.82569
1013	lcl|c227267_g3_i2|m.12289	316	0	1	2	3	0	4	5	4	1	2	3	3	2	3	5	2	2	1	-0.029	-0.1015	0.975887	0.366707	0.810181
1014	lcl|c227282_g1_i10|m.12296	273	0	1	0	1	1	2	1	1	1	1	1	0	0	1	1	0	0	2	0.029	0.0686	0.845345	0.211962	0.829481
1015	lcl|c227289_g1_i2|m.12315	174	0	0	1	0	2	1	2	0	0	0	1	0	1	1	2	0	1	1	-0.322	-0.8616	0.652952	0.653862	0.134237
1016	lcl|c227290_g1_i5|m.12317	154	0	0	0	0	0	1	0	1	1	0	1	0	0	0	0	0	1	1	-0.094	-0.2265	0.99718	0.46983	0.770812
1017	lcl|c227293_g2_i4|m.12320	194	2	3	4	4	6	6	4	3	6	3	5	7	5	7	7	4	8	5	-0.182	-0.8419	0.696958	0.653778	0.151474
1018	lcl|c227297_g1_i3|m.12321	135	1	0	4	3	3	4	3	3	1	3	1	4	2	2	2	0	3	4	0.096	0.3555	0.326827	0.043112	0.799099
1019	lcl|c227322_g4_i4|m.12336	166	1	0	1	2	3	2	2	2	1	1	2	5	2	1	2	0	2	2	-0.03	-0.0913	0.972279	0.357494	0.812373
1020	lcl|c227332_g2_i2|m.12341	389	40	40	52	52	43	57	50	62	39	50	58	49	53	53	51	58	44	55	0.007	0.0992	0.802927	0.186368	0.829374
1021	lcl|c227361_g2_i9|m.12363	300	4	6	6	9	6	11	8	12	5	6	7	11	8	12	7	5	9	15	0.265	1.5434	0	0	0.652804
1022	lcl|c227365_g1_i1|m.12366	980	0	0	0	0	0	0	0	0	0	0	0	1	1	0	0	0	0	0	-0.139	-0.3237	1	0.532962	0.720804
1023	lcl|c227396_g2_i4|m.12400	168	0	0	1	0	0	1	1	0	0	1	0	1	0	1	0	0	1	1	-0.1	-0.2474	0.998508	0.484783	0.761683
1024	lcl|c227414_g2_i1|m.12410	532	1	4	4	3	4	3	3	4	3	4	3	3	2	3	4	2	4	2	-0.094	-0.3701	1	0.557343	0.689405
1025	lcl|c227486_g1_i2|m.12483	189	0	0	0	0	0	0	0	0	0	0	0	0	0	1	0	0	0	0	-0.073	-0.1733	0.992021	0.428563	0.790558
1026	lcl|c227531_g4_i11|m.12520	245	5	10	5	5	3	7	7	8	8	8	9	4	11	13	8	6	11	11	-0.034	-0.2034	0.995423	0.452459	0.779976
1027	lcl|c227533_g4_i2|m.12539	532	0	0	1	2	0	3	1	1	0	0	0	1	1	2	0	2	1	2	0.266	0.7436	0.015546	0.001268	0.729046
1028	lcl|c227534_g3_i1|m.12547	501	0	0	0	0	0	0	1	0	0	1	0	0	0	0	0	0	0	0	-0.159	-0.4265	1	0.58228	0.643561
1029	lcl|c227537_g2_i4|m.12549	637	4	2	3	5	2	5	6	2	2	4	3	1	3	2	3	5	2	5	-0.019	-0.0739	0.965168	0.341613	0.81579
1030	lcl|c227543_g1_i1|m.12562	429	4	6	6	12	4	15	3	12	1	9	9	12	4	6	6	9	6	9	0.619	3.6104	0	0	0.60616
1031	lcl|c227543_g1_i4|m.12563	397	6	6	6	11	4	11	3	13	3	13	8	8	5	10	5	7	6	9	0.526	2.8783	0	0	0.611735
1032	lcl|c227548_g2_i4|m.12564	536	0	0	0	0	0	0	0	0	0	0	0	0	0	0	1	0	0	0	-0.101	-0.2443	0.998387	0.482612	0.763089
1033	lcl|c227548_g3_i11|m.12568	133	0	0	0	1	1	2	1	1	0	1	1	0	0	0	1	0	1	0	-0.049	-0.1225	0.982139	0.385395	0.805215
1034	lcl|c227562_g6_i1|m.12582	260	39	32	39	33	36	38	47	48	42	38	36	30	31	33	32	28	38	37	-0.176	-2.2199	0	0.614387	0
1035	lcl|c227564_g2_i6|m.12586	532	0	0	0	0	0	0	1	2	0	0	0	0	0	0	1	0	0	0	-0.065	-0.1565	0.989387	0.414651	0.795834
1036	lcl|c227565_g2_i7|m.12589	769	1	0	0	0	1	0	0	0	0	0	0	0	0	0	0	0	1	0	-0.127	-0.3096	1	0.524825	0.729313
1037	lcl|c227571_g1_i1|m.12592	437	1	1	0	1	2	2	1	1	2	2	0	1	0	0	0	0	0	1	-0.158	-0.4226	1	0.580713	0.647018
1038	lcl|c227586_g2_i2|m.12601	705	1	0	0	0	1	1	1	1	0	1	0	0	0	1	0	0	0	0	-0.157	-0.3904	1	0.566892	0.673917
1039	lcl|c227622_g3_i13|m.12621	385	0	0	1	0	0	0	0	1	0	0	0	0	0	0	0	0	0	0	-0.141	-0.3496	1	0.547018	0.703943
1040	lcl|c227646_g4_i2|m.12636	343	0	0	0	0	0	0	0	0	0	0	0	0	0	0	1	0	1	0	-0.124	-0.32	1	0.53086	0.723082
1041	lcl|c227657_g3_i1|m.12650	192	8	12	9	18	13	19	7	14	9	10	14	5	12	12	10	13	10	20	0.187	1.4061	1e-06	0	0.661854
1042	lcl|c227676_g2_i3|m.12666	275	0	0	0	1	0	1	0	0	0	0	0	1	0	0	1	0	0	0	-0.122	-0.3123	1	0.52641	0.727719
1043	lcl|c227683_g10_i1|m.12674	266	0	0	3	1	1	1	0	3	0	0	0	1	0	3	0	0	0	3	0.131	0.3564	0.325264	0.042839	0.798935
1044	lcl|c227702_g4_i1|m.12691	204	3	4	4	1	4	4	3	3	3	4	4	0	4	3	5	3	3	3	-0.312	-1.2942	0.032323	0.636869	0.003065
1045	lcl|c227713_g1_i1|m.12700	393	0	0	0	0	0	0	0	0	1	1	0	0	0	1	0	0	0	0	-0.14	-0.3472	1	0.545763	0.705575
1046	lcl|c227719_g9_i2|m.12705	247	0	0	0	0	0	0	0	1	0	1	0	0	0	0	0	0	0	0	-0.135	-0.3338	1	0.538579	0.714423
1047	lcl|c227720_g2_i2|m.12706	256	1	1	1	1	1	0	1	1	1	1	1	3	1	3	3	1	2	2	0.056	0.1539	0.713225	0.144523	0.826856
1048	lcl|c227721_g2_i2|m.12707	197	2	2	2	4	4	7	4	6	2	4	1	3	3	4	1	4	4	8	0.451	1.7731	0	0	0.640329
1049	lcl|c227726_g1_i1|m.12708	228	0	0	0	0	0	0	0	0	0	0	0	0	0	0	0	1	0	0	-0.077	-0.1852	0.993502	0.438174	0.786551
1050	lcl|c227731_g2_i1|m.12715	335	0	0	0	0	0	0	0	0	0	0	0	0	0	0	0	0	0	1	-0.1	-0.2415	0.998255	0.480637	0.764344
1051	lcl|c227735_g3_i4|m.12716	337	0	0	0	0	0	0	0	0	0	0	0	0	0	0	0	0	0	0	-0.097	-0.2419	0.998279	0.48092	0.764166
1052	lcl|c227738_g1_i4|m.12717	147	0	0	1	1	1	1	2	1	0	1	1	1	0	0	0	0	1	2	-0.089	-0.2257	0.997157	0.469243	0.771145
1053	lcl|c227758_g2_i4|m.12736	767	3	13	10	17	10	17	8	18	7	13	6	2	5	9	6	14	5	7	0.462	2.8722	0	0	0.611819
1054	lcl|c227771_g3_i3|m.12752	258	0	1	0	1	0	0	0	0	0	0	0	0	0	0	0	0	0	0	-0.087	-0.2132	0.996274	0.459935	0.776203
1055	lcl|c227772_g1_i1|m.12754	161	13	16	15	17	12	16	15	16	15	23	14	5	19	18	15	21	15	18	0.012	0.0944	0.809936	0.190289	0.829456
1056	lcl|c227780_g2_i3|m.12767	229	2	2	4	2	2	1	2	0	5	4	2	1	2	1	2	1	1	0	-0.501	-1.5228	0.002526	0.628151	0.000181
1057	lcl|c227794_g1_i1|m.12770	442	3	6	4	9	6	7	5	8	3	6	2	3	1	2	3	5	3	3	0.33	1.6007	0	0	0.649344
1058	lcl|c227804_g2_i3|m.12774	308	0	0	2	1	1	2	0	0	0	1	2	2	0	0	0	0	2	1	-0.187	-0.4916	1	0.605283	0.579333
1059	lcl|c227822_g3_i4|m.12810	374	0	0	0	0	0	0	0	1	0	0	0	0	0	0	0	0	0	0	-0.13	-0.312	1	0.526235	0.727897
1060	lcl|c227847_g4_i2|m.12829	308	0	1	1	0	0	0	0	0	2	2	1	2	1	0	1	0	2	1	-0.104	-0.2675	0.999607	0.498459	0.752104
1061	lcl|c227850_g3_i1|m.12830	170	0	0	0	0	0	1	0	0	0	0	0	0	0	0	0	0	0	0	-0.124	-0.3065	1	0.52299	0.731122
1062	lcl|c227852_g1_i7|m.12835	188	0	3	1	1	1	0	1	2	0	1	0	0	0	0	0	1	0	0	0.108	0.2706	0.486709	0.075606	0.813421
1063	lcl|c227856_g7_i5|m.12838	158	1	1	2	3	1	1	1	2	1	2	1	2	1	1	1	1	0	0	0.204	0.5732	0.074529	0.007235	0.757828
1064	lcl|c227887_g3_i2|m.12871	160	0	1	0	2	0	2	1	1	0	0	0	0	0	3	1	1	1	3	0.288	0.7304	0.017758	0.001467	0.73108
1065	lcl|c227910_g4_i10|m.12878	360	1	3	10	10	7	13	12	14	3	6	7	6	3	4	6	7	11	12	0.109	0.6292	0.046188	0.004221	0.747793
1066	lcl|c227927_g4_i1|m.12894	353	1	4	2	3	2	3	2	3	4	4	4	2	3	4	5	3	5	5	0.009	0.0372	0.882518	0.239494	0.828535
1067	lcl|c227928_g1_i1|m.12895	125	3	2	0	2	0	2	1	1	0	2	0	2	2	6	5	9	2	4	0.44	1.6045	0	0	0.649122
1068	lcl|c227928_g3_i2|m.12898	238	1	3	3	5	8	4	4	4	5	3	1	0	4	4	4	4	5	4	-0.211	-0.9032	0.55643	0.65351	0.1024
1069	lcl|c227928_g3_i2|m.12899	143	2	3	2	2	2	2	1	2	3	2	1	0	2	1	1	3	2	3	0.04	0.1305	0.753583	0.16175	0.828279
1070	lcl|c227928_g3_i7|m.12901	268	3	5	4	6	9	9	5	8	5	5	2	2	5	6	4	5	6	8	0.118	0.5526	0.088028	0.008749	0.761638
1071	lcl|c227939_g2_i2|m.12910	265	4	9	7	9	7	13	12	11	6	6	5	12	9	10	3	4	10	9	0.172	1.0575	0.000376	2.3e-05	0.690247
1072	lcl|c227957_g2_i7|m.12923	709	0	1	1	1	1	2	1	0	0	1	1	0	0	1	1	1	0	2	0.034	0.0857	0.822347	0.197489	0.829543
1073	lcl|c227969_g2_i1|m.12933	185	0	0	0	1	0	1	0	0	0	0	0	2	0	0	1	1	0	0	0.006	0.016	0.903971	0.25863	0.827261
1074	lcl|c227969_g5_i2|m.12934	168	15	13	17	19	14	17	17	12	19	14	18	14	19	18	22	17	17	18	-0.195	-1.736	0.000142	0.622493	8e-06
1075	lcl|c227993_g1_i6|m.12952	475	3	7	9	9	10	15	8	6	20	11	8	6	15	16	18	8	16	7	-0.336	-2.3631	0	0.612634	0
1076	lcl|c228029_g3_i2|m.12983	320	0	0	0	0	0	1	0	1	0	0	0	0	0	0	1	0	0	1	-0.105	-0.2789	1	0.505906	0.746304
1077	lcl|c228038_g3_i1|m.12994	151	4	0	4	2	2	2	2	2	2	5	4	7	1	3	4	1	1	0	-0.065	-0.238	0.997967	0.478149	0.765891
1078	lcl|c228056_g1_i3|m.13005	230	1	2	3	1	3	2	3	3	4	2	2	3	3	2	4	2	2	3	-0.264	-0.9597	0.42649	0.652121	0.068584
1079	lcl|c228056_g1_i4|m.13006	230	1	3	5	3	5	3	4	3	4	1	3	4	3	3	5	3	4	5	-0.26	-1.0336	0.27742	0.649259	0.0384
1080	lcl|c228078_g1_i1|m.13021	176	0	0	1	1	1	1	0	1	0	1	0	0	0	0	1	0	0	0	-0.112	-0.2765	1	0.504357	0.747547
1081	lcl|c228092_g3_i1|m.13033	369	2	2	0	1	1	1	2	1	3	1	0	0	2	1	1	1	1	1	-0.422	-1.1586	0.110731	0.643282	0.01253
1082	lcl|c228113_g1_i1|m.13052	411	3	5	10	7	3	7	7	9	5	9	3	4	1	4	5	3	1	9	0.254	1.3073	8e-06	0	0.668984
1083	lcl|c228121_g2_i2|m.13058	350	4	5	3	5	9	5	6	7	4	7	6	1	4	3	8	6	3	3	-0.213	-1.026	0.291181	0.64959	0.040878
1084	lcl|c228124_g2_i1|m.13060	192	0	0	0	0	0	0	0	0	0	1	0	0	0	0	0	0	0	0	-0.066	-0.165	0.990796	0.421739	0.793219
1085	lcl|c228137_g1_i4|m.13071	387	0	0	0	0	0	0	0	0	0	0	1	1	0	0	0	1	0	1	-0.098	-0.2335	0.997741	0.474921	0.767846
1086	lcl|c228151_g1_i2|m.13084	281	1	0	1	0	1	1	0	2	1	1	0	0	0	0	1	1	1	1	-0.051	-0.1333	0.9848	0.394835	0.802418
1087	lcl|c228156_g1_i5|m.13085	304	0	0	0	0	0	0	0	0	0	0	0	1	0	0	0	1	0	1	-0.116	-0.2872	1	0.511185	0.74191
1088	lcl|c228175_g2_i1|m.13095	1436	0	0	0	0	0	0	0	0	0	0	1	0	0	0	0	0	0	0	-0.176	-0.439	1	0.587154	0.632184
1089	lcl|c228205_g4_i2|m.13127	226	1	1	4	4	2	2	2	4	2	1	3	2	2	2	3	5	3	4	0.018	0.0699	0.843661	0.210848	0.829497
1090	lcl|c228207_g1_i1|m.13128	756	0	0	0	0	1	0	0	1	0	1	0	1	0	0	0	0	0	0	-0.121	-0.3032	1	0.521018	0.733024
1091	lcl|c228221_g2_i9|m.13137	967	21	29	26	28	32	29	37	42	22	25	19	25	20	25	27	22	31	32	-0.023	-0.2432	0.998345	0.481838	0.763584
1092	lcl|c228244_g5_i1|m.13157	345	11	8	5	7	17	16	21	32	15	19	1	3	10	28	21	18	13	17	0.138	1.0771	0.000287	1.7e-05	0.688347
1093	lcl|c228247_g2_i1|m.13162	706	1	0	0	1	0	0	0	1	0	0	0	1	0	0	0	1	0	0	-0.15	-0.3851	1	0.564462	0.678067
1094	lcl|c228256_g1_i10|m.13166	252	0	0	0	0	0	1	0	0	0	0	0	0	0	0	0	0	1	0	-0.121	-0.3014	1	0.519934	0.734052
1095	lcl|c228278_g3_i2|m.13197	394	0	0	0	0	0	0	0	0	0	0	0	0	0	0	0	0	0	0	-0.119	-0.2867	1	0.51087	0.742178
1096	lcl|c228300_g4_i1|m.13216	616	4	8	4	5	8	8	10	9	9	8	9	10	8	10	4	8	6	13	0.141	0.8432	0.005368	0.000398	0.714812
1097	lcl|c228309_g1_i2|m.13220	196	1	2	1	4	1	3	4	3	1	4	1	5	1	4	2	4	2	7	0.73	2.5401	0	0	0.618083
1098	lcl|c228309_g1_i6|m.13221	556	2	2	2	6	1	4	5	6	1	7	3	5	3	6	3	4	2	9	0.635	2.4726	0	0	0.619676
1099	lcl|c228314_g1_i1|m.13228	195	0	0	0	0	0	1	0	0	0	0	0	9	0	0	0	0	1	0	0.469	1.2928	1.1e-05	1e-06	0.670078
1100	lcl|c228317_g4_i1|m.13231	201	4	7	5	5	3	6	9	7	4	7	4	7	6	8	5	6	6	5	0.102	0.5265	0.107868	0.01106	0.766541
1101	lcl|c228325_g7_i1|m.13245	190	0	0	1	0	0	0	0	1	0	1	0	0	0	1	0	2	0	1	0.002	0.0037	0.915102	0.269879	0.826279
1102	lcl|c228330_g5_i1|m.13250	356	0	0	0	0	0	1	0	0	0	0	0	0	2	0	0	0	6	1	-0.567	-1.4721	0.004662	0.629832	0.000356
1103	lcl|c228343_g4_i4|m.13280	1114	0	0	0	1	0	0	0	1	0	0	0	0	0	0	0	0	0	0	-0.16	-0.3914	1	0.567345	0.673125
1104	lcl|c228374_g2_i1|m.13291	228	1	2	1	1	2	2	2	1	2	1	2	4	1	4	3	4	1	2	0.234	0.7766	0.011058	0.000873	0.724114
1105	lcl|c228380_g1_i2|m.13296	215	0	0	0	1	0	1	1	3	0	1	1	0	1	1	2	0	0	0	-0.034	-0.0826	0.968887	0.349576	0.814132
1106	lcl|c228390_g1_i2|m.13299	570	0	2	4	3	2	5	2	1	3	2	5	3	2	1	3	3	4	2	-0.236	-0.8419	0.696958	0.653778	0.151474
1107	lcl|c228406_g1_i6|m.13304	299	1	1	6	5	5	4	1	5	3	7	2	3	2	3	1	3	4	4	0.167	0.6767	0.029912	0.002605	0.739705
1108	lcl|c228451_g2_i1|m.13337	252	0	0	0	1	0	1	0	0	1	0	0	0	1	0	0	0	1	1	-0.08	-0.1956	0.994625	0.4464	0.782862
1109	lcl|c228453_g2_i2|m.13342	106	0	0	4	1	2	3	2	1	1	3	2	3	1	1	1	0	1	0	-0.082	-0.2408	0.998208	0.480141	0.764655
1110	lcl|c228461_g1_i2|m.13347	301	0	1	2	2	1	1	2	1	1	2	1	2	1	1	1	2	1	1	0.028	0.0731	0.839453	0.208114	0.829528
1111	lcl|c228471_g5_i1|m.13357	224	0	0	0	0	0	0	0	0	0	0	0	0	0	0	0	0	0	0	-0.096	-0.2281	0.997321	0.471001	0.770142
1112	lcl|c228479_g4_i1|m.13361	630	0	1	0	1	1	1	0	0	1	1	2	0	1	1	1	1	1	0	-0.24	-0.6171	0.992945	0.635286	0.424283
1113	lcl|c228497_g4_i2|m.13372	297	0	1	0	0	0	3	1	1	0	1	0	0	2	1	0	2	0	2	0.085	0.2269	0.574049	0.098006	0.819525
1114	lcl|c228506_g1_i2|m.13379	474	3	5	8	10	8	13	8	15	6	11	7	11	6	7	7	9	6	7	0.292	1.7153	0	0	0.643099
1115	lcl|c228524_g1_i1|m.13396	300	1	1	1	1	2	2	2	4	3	2	1	0	2	1	1	1	2	1	-0.219	-0.6364	0.983519	0.638479	0.398176
1116	lcl|c228525_g4_i3|m.13399	504	3	8	3	6	4	6	4	7	1	8	5	6	2	4	5	7	5	4	0.425	2.0786	0	0	0.629571
1117	lcl|c228527_g1_i1|m.13403	173	0	0	0	0	0	1	2	0	1	0	0	1	0	0	1	1	0	0	-0.189	-0.4642	1	0.596306	0.607867
1118	lcl|c228529_g1_i1|m.13404	353	4	3	9	2	9	9	6	5	9	3	11	1	8	6	15	3	11	2	-0.926	-4.7821	0	0.603813	0
1119	lcl|c228543_g5_i2|m.13413	375	2	1	1	3	3	4	4	4	3	3	3	2	3	3	2	3	6	7	-0.011	-0.0402	0.947399	0.310482	0.821277
1120	lcl|c228577_g3_i1|m.13439	356	0	0	0	0	0	0	0	0	1	0	0	0	1	0	0	0	0	0	-0.16	-0.3777	1	0.560995	0.683736
1121	lcl|c228583_g3_i2|m.13440	202	3	6	9	13	9	13	12	9	9	10	7	8	5	8	8	6	9	8	0.016	0.1006	0.800824	0.185231	0.829346
1122	lcl|c228583_g6_i1|m.13441	491	43	50	54	61	53	57	60	60	39	54	47	39	59	53	57	48	56	63	-0.07	-1.1342	0.134801	0.644483	0.015804
1123	lcl|c228588_g1_i6|m.13448	160	0	0	0	0	0	0	0	0	0	0	0	0	0	0	0	0	0	0	-0.098	-0.2275	0.997255	0.470562	0.770393
1124	lcl|c228608_g2_i2|m.13456	420	0	0	0	3	0	2	5	4	0	3	1	2	0	4	0	0	1	3	0.364	1.1055	0.000192	1.1e-05	0.685679
1125	lcl|c228611_g1_i2|m.13461	119	1	2	4	2	0	3	3	3	0	4	2	1	2	1	1	1	2	3	0.031	0.1035	0.796454	0.182886	0.829281
1126	lcl|c228611_g7_i1|m.13463	400	2	4	4	3	1	2	3	4	1	1	3	0	2	2	0	1	5	4	-0.101	-0.3559	1	0.550265	0.69959
1127	lcl|c228621_g3_i1|m.13469	135	0	0	0	1	1	2	1	0	0	0	0	3	0	1	0	1	0	2	0.212	0.5787	0.071225	0.006872	0.756821
1128	lcl|c228623_g6_i3|m.13470	269	0	0	0	1	1	3	2	5	0	0	3	0	2	1	3	1	1	0	-0.112	-0.3503	1	0.547382	0.703465
1129	lcl|c228653_g2_i5|m.13498	486	0	3	2	4	2	4	2	1	5	2	2	3	3	1	2	2	2	3	-0.052	-0.1841	0.993393	0.437294	0.786931
1130	lcl|c228653_g2_i7|m.13499	354	0	3	1	3	2	3	2	0	4	2	2	3	3	1	1	2	2	3	0.016	0.0568	0.860062	0.222176	0.829254
1131	lcl|c228665_g3_i2|m.13504	248	1	3	0	1	4	4	5	4	0	3	3	9	4	10	6	4	4	8	0.338	1.4304	1e-06	0	0.66018
1132	lcl|c228666_g1_i2|m.13507	218	1	3	12	11	9	9	8	5	1	4	13	1	4	4	5	2	9	7	-0.366	-1.9476	5e-06	0.618477	0
1133	lcl|c228682_g2_i2|m.13534	813	0	0	0	0	0	0	0	0	0	0	0	0	0	0	0	0	0	0	-0.188	-0.4747	1	0.599862	0.597189
1134	lcl|c228683_g1_i7|m.13540	166	0	0	0	0	0	0	0	0	0	0	0	1	0	0	1	0	0	0	-0.114	-0.2907	1	0.513374	0.740013
1135	lcl|c228700_g2_i2|m.13570	222	0	0	1	1	0	2	2	1	0	0	0	0	0	0	0	0	1	0	-0.101	-0.2536	0.998929	0.489076	0.758814
1136	lcl|c228709_g4_i2|m.13577	159	3	3	2	2	3	2	3	3	3	3	2	0	2	3	4	3	2	3	-0.168	-0.6182	0.992478	0.635478	0.4228
1137	lcl|c228728_g1_i4|m.13597	471	2	5	4	5	5	6	4	8	0	5	3	1	1	3	3	7	5	3	0.266	1.1163	0.000164	1e-05	0.684688
1138	lcl|c228742_g3_i1|m.13609	150	1	0	1	0	1	0	1	0	1	2	0	3	1	2	1	2	0	1	0.264	0.6917	0.025941	0.002225	0.73724
1139	lcl|c228746_g2_i5|m.13610	502	3	4	3	4	3	3	5	3	4	3	4	4	4	4	5	3	6	5	-0.205	-0.8835	0.60249	0.653759	0.116712
1140	lcl|c228746_g3_i3|m.13615	501	4	0	4	3	2	2	6	4	3	3	5	8	2	4	5	1	5	3	-0.259	-1.0396	0.266857	0.648993	0.036535
1141	lcl|c228772_g4_i5|m.13636	598	11	16	16	22	18	24	22	24	17	23	11	22	10	19	16	16	16	19	0.185	1.7129	0	0	0.64322
1142	lcl|c228778_g1_i1|m.13644	342	1	2	0	1	1	1	1	1	1	1	1	0	1	4	1	1	2	1	0.076	0.2055	0.616303	0.110468	0.822085
1143	lcl|c228789_g1_i1|m.13647	461	2	8	8	10	7	11	12	15	4	9	4	6	5	6	3	5	7	9	0.278	1.6175	0	0	0.64837
1144	lcl|c228794_g3_i8|m.13650	497	0	0	0	0	0	1	0	0	0	0	1	0	0	0	1	0	0	0	-0.11	-0.2719	0.999911	0.501361	0.749898
1145	lcl|c228810_g2_i1|m.13670	238	0	0	0	1	0	1	0	0	0	1	1	1	0	0	0	0	0	0	-0.112	-0.2732	0.99996	0.502211	0.749238
1146	lcl|c228815_g2_i1|m.13678	308	0	0	0	0	0	0	0	0	0	0	0	0	0	0	0	0	0	0	-0.18	-0.4625	1	0.595716	0.609566
1147	lcl|c228825_g1_i1|m.13684	617	5	12	12	13	13	14	15	16	13	15	18	16	17	19	23	19	20	23	-0.011	-0.0998	0.97529	0.365177	0.810556
1148	lcl|c228830_g2_i1|m.13692	262	2	8	2	5	4	10	5	7	5	5	1	5	2	5	2	4	4	8	0.587	2.5286	0	0	0.61835
1149	lcl|c228833_g2_i1|m.13698	204	0	0	0	0	0	0	0	0	0	0	0	0	0	0	2	0	0	0	-0.183	-0.4364	1	0.586159	0.634588
1150	lcl|c228847_g1_i2|m.13712	355	0	0	0	0	0	0	0	0	0	0	0	1	1	0	0	0	1	0	-0.127	-0.3093	1	0.524648	0.729489
1151	lcl|c228854_g2_i6|m.13724	516	0	2	2	1	0	4	1	1	0	3	0	1	1	2	0	0	0	1	0.269	0.7734	0.011436	0.000906	0.724583
1152	lcl|c228864_g3_i2|m.13732	444	3	16	75	47	79	73	39	33	18	11	79	32	16	12	72	26	48	32	-0.495	-7.0069	0	0.60112	0
1153	lcl|c228868_g10_i1|m.13735	171	0	2	2	2	7	4	5	2	4	2	3	2	4	1	4	4	4	4	-0.476	-1.857	2.1e-05	0.620067	1e-06
1154	lcl|c228869_g1_i2|m.13736	285	0	0	1	0	0	1	1	0	0	0	0	2	0	1	0	1	1	0	-0.019	-0.0479	0.951954	0.31762	0.820152
1155	lcl|c228904_g1_i5|m.13760	420	5	7	1	5	4	9	9	14	3	8	6	1	5	11	6	12	8	10	0.355	1.9864	0	0	0.63226
1156	lcl|c228917_g5_i9|m.13783	768	0	0	1	1	0	1	2	0	1	0	0	0	1	0	0	0	0	0	-0.221	-0.5548	1	0.622485	0.505615
1157	lcl|c228938_g1_i7|m.13803	402	0	0	0	0	0	0	1	0	0	0	0	0	0	1	1	0	0	0	-0.122	-0.2887	1	0.512126	0.7411
1158	lcl|c228940_g3_i1|m.13807	207	0	2	0	0	1	0	2	0	0	0	5	0	0	2	1	5	2	0	-0.039	-0.1105	0.978735	0.374766	0.808128
1159	lcl|c228945_g3_i2|m.13809	275	5	7	6	11	8	10	5	9	2	9	5	5	6	4	8	10	10	9	0.173	0.9992	0.000817	5.2e-05	0.696206
1160	lcl|c228955_g3_i2|m.13813	368	1	8	9	8	11	9	6	8	6	6	1	4	4	4	2	5	2	3	0.123	0.6353	0.043745	0.003972	0.746731
1161	lcl|c228984_g1_i2|m.13846	896	0	0	0	0	0	0	0	0	0	0	0	0	0	0	0	0	0	0	-0.148	-0.3618	1	0.553246	0.695422
1162	lcl|c228994_g6_i1|m.13852	154	3	6	9	9	7	9	3	5	6	9	6	11	9	9	3	2	9	2	0.02	0.1094	0.787479	0.178159	0.829123
1163	lcl|c229000_g3_i3|m.13860	120	0	0	0	0	1	0	1	0	0	0	0	0	0	0	0	0	0	0	-0.112	-0.281	1	0.507253	0.745206
1164	lcl|c229012_g1_i8|m.13875	285	2	3	6	11	1	18	4	15	3	8	3	24	3	6	5	19	3	14	1.221	6.4874	0	0	0.600543
1165	lcl|c229017_g1_i1|m.13879	454	3	1	0	0	5	6	3	1	7	4	3	8	3	7	5	1	2	4	-0.055	-0.2223	0.996982	0.466737	0.772549
1166	lcl|c229021_g1_i1|m.13887	468	0	0	0	0	0	0	0	0	0	0	0	0	1	0	0	0	0	1	-0.132	-0.3137	1	0.527227	0.726886
1167	lcl|c229025_g3_i1|m.13888	182	0	1	1	0	0	1	0	1	1	1	1	1	2	2	0	0	2	1	-0.206	-0.5597	1	0.623632	0.499482
1168	lcl|c229032_g2_i1|m.13894	237	0	0	2	4	1	1	0	0	0	1	1	0	0	0	0	1	2	2	-0.036	-0.1028	0.976327	0.367876	0.809891
1169	lcl|c229032_g2_i3|m.13895	243	0	0	3	4	1	1	0	0	0	1	1	0	0	0	0	1	2	2	-0.039	-0.1062	0.977409	0.370925	0.809123
1170	lcl|c229041_g1_i1|m.13901	398	0	0	0	0	0	1	0	0	0	0	1	0	1	0	0	1	0	1	-0.123	-0.3124	1	0.526469	0.727659
1171	lcl|c229050_g10_i2|m.13907	227	0	0	0	0	0	0	0	1	0	0	0	1	0	1	0	0	0	0	-0.122	-0.3073	1	0.523465	0.730657
1172	lcl|c229055_g1_i1|m.13922	312	41	26	43	34	18	23	26	42	62	70	18	28	53	51	46	29	2	2	-0.133	-1.5622	0.001542	0.62694	0.000105
1173	lcl|c229056_g1_i4|m.13924	213	7	11	7	9	5	11	16	24	8	19	10	3	9	11	8	18	4	5	0.278	1.875	0	0	0.636082
1174	lcl|c229060_g1_i1|m.13927	596	2	1	1	1	0	2	0	1	2	2	1	4	0	1	1	0	0	3	0.169	0.4921	0.139149	0.014902	0.773102
1175	lcl|c229067_g1_i3|m.13935	233	3	3	3	4	2	4	3	3	4	4	3	3	3	3	3	2	3	3	-0.047	-0.1921	0.994307	0.44365	0.784124
1176	lcl|c229067_g1_i5|m.13937	119	1	1	1	3	1	3	2	2	1	1	1	4	1	1	1	1	1	2	0.389	1.1402	0.000116	7e-06	0.682543
1177	lcl|c229067_g1_i6|m.13938	234	4	4	4	7	3	7	5	5	5	5	4	7	4	4	4	3	4	6	0.164	0.7666	0.012276	0.000979	0.725586
1178	lcl|c229073_g2_i1|m.13946	385	0	3	1	4	2	3	1	2	4	4	3	2	2	6	4	5	2	5	0.38	1.4497	1e-06	0	0.658872
1179	lcl|c229089_g2_i5|m.13955	509	0	1	2	2	2	3	2	2	2	1	0	1	0	1	1	2	0	1	-0.079	-0.2314	0.997616	0.473402	0.768745
1180	lcl|c229093_g1_i2|m.13957	207	0	1	2	2	1	1	0	0	0	1	0	1	0	2	0	0	0	2	0.03	0.0784	0.832412	0.203617	0.829555
1181	lcl|c229095_g1_i2|m.13958	456	1	0	1	1	1	1	2	1	1	1	0	0	0	1	2	1	0	0	-0.292	-0.7676	0.841738	0.651642	0.228638
1182	lcl|c229109_g1_i2|m.13969	603	0	1	2	3	4	4	5	2	2	0	5	0	2	4	2	3	4	2	-0.343	-1.2061	0.073835	0.640964	0.007828
1183	lcl|c229110_g2_i1|m.13970	436	3	4	6	7	5	8	3	5	3	5	4	8	4	6	6	5	7	6	0.17	0.8622	0.00433	0.000315	0.712315
1184	lcl|c229132_g1_i2|m.13984	548	3	0	5	9	5	11	11	10	3	7	3	12	0	7	2	5	4	8	0.508	2.5435	0	0	0.618005
1185	lcl|c229134_g1_i1|m.13988	358	3	4	2	4	3	3	1	2	1	4	1	1	2	3	1	2	2	3	0.292	0.9966	0.000845	5.4e-05	0.696483
1186	lcl|c229184_g1_i1|m.14022	370	0	0	0	0	0	0	1	0	0	0	0	0	0	0	0	0	0	0	-0.109	-0.2668	0.999539	0.497995	0.752451
1187	lcl|c229187_g1_i7|m.14030	325	0	0	0	0	0	0	0	0	0	0	0	1	0	0	0	0	0	0	-0.111	-0.2721	0.99992	0.501492	0.749796
1188	lcl|c229199_g3_i1|m.14042	207	0	0	0	1	0	0	0	0	0	0	0	0	0	0	0	0	0	0	-0.092	-0.2322	0.997669	0.473982	0.768404
1189	lcl|c229207_g3_i3|m.14046	388	1	5	2	2	4	7	5	4	3	6	1	2	2	2	3	0	3	5	0.176	0.6786	0.029382	0.002554	0.739391
1190	lcl|c229257_g3_i5|m.14100	145	1	1	0	0	0	0	0	0	1	1	0	0	1	1	0	0	0	0	-0.122	-0.2967	1	0.517077	0.736701
1191	lcl|c229261_g2_i4|m.14109	321	0	0	0	0	0	0	0	1	0	0	0	2	0	2	0	0	0	1	0.07	0.1768	0.671375	0.128723	0.825001
1192	lcl|c229298_g2_i1|m.14136	435	2	10	9	13	17	17	15	15	6	14	14	19	14	21	17	18	21	26	0.196	1.6276	0	0	0.647793
1193	lcl|c229310_g3_i5|m.14142	374	0	0	0	0	0	0	0	1	0	1	0	0	0	1	0	0	0	2	-0.042	-0.1005	0.975539	0.365807	0.810402
1194	lcl|c229310_g3_i5|m.14143	140	2	2	1	2	0	2	0	1	0	1	1	0	0	1	0	1	1	1	0.041	0.1126	0.782472	0.17562	0.829023
1195	lcl|c229340_g1_i1|m.14173	395	9	10	4	7	3	14	9	18	7	9	8	8	6	8	9	5	8	16	0.289	1.7989	0	0	0.639178
1196	lcl|c229342_g3_i2|m.14179	805	0	1	0	0	1	1	1	0	0	0	0	0	1	0	0	0	0	0	-0.127	-0.3125	1	0.526527	0.7276
1197	lcl|c229348_g1_i1|m.14183	147	1	1	0	0	0	1	1	0	0	0	0	0	0	0	0	0	0	0	-0.141	-0.3527	1	0.548624	0.701814
1198	lcl|c229348_g3_i2|m.14185	140	0	1	0	0	0	0	0	0	1	0	1	3	0	0	0	0	1	0	0.064	0.1647	0.693743	0.136938	0.826036
1199	lcl|c229351_g6_i1|m.14197	136	0	1	0	1	1	2	0	1	1	0	1	2	1	1	1	2	2	1	0.041	0.1087	0.788571	0.178717	0.829144
1200	lcl|c229353_g1_i2|m.14200	307	0	0	0	0	0	0	0	1	0	0	0	0	0	0	1	1	0	0	-0.105	-0.2657	0.999498	0.497263	0.752995
1201	lcl|c229362_g2_i10|m.14209	664	0	0	0	0	0	0	0	0	1	0	0	0	0	0	0	1	0	0	-0.159	-0.3804	1	0.56227	0.681685
1202	lcl|c229422_g1_i2|m.14250	231	29	35	37	29	29	31	35	42	41	33	36	39	35	38	35	38	29	36	-0.042	-0.5356	1	0.617743	0.529106
1203	lcl|c229422_g1_i9|m.14251	202	21	22	22	19	20	20	23	31	26	18	25	31	21	29	25	24	16	23	-0.003	-0.0272	0.938994	0.298423	0.823007
1204	lcl|c229426_g2_i2|m.14255	141	0	0	0	0	0	0	0	0	0	0	1	0	0	0	0	0	0	0	-0.116	-0.2776	1	0.505068	0.746979
1205	lcl|c229426_g2_i4|m.14256	196	2	1	0	0	0	1	1	1	1	1	1	0	1	1	1	0	0	0	-0.171	-0.419	1	0.579246	0.650171
1206	lcl|c229445_g3_i3|m.14271	145	0	0	1	1	0	0	0	0	0	0	0	1	0	1	1	0	0	0	-0.144	-0.3518	1	0.548159	0.702435
1207	lcl|c229460_g5_i1|m.14276	899	0	1	0	0	0	0	0	0	0	0	0	1	0	0	0	1	0	0	-0.164	-0.4114	1	0.576085	0.656705
1208	lcl|c229461_g3_i2|m.14279	226	2	1	3	1	2	5	1	2	1	1	0	0	0	1	1	0	1	0	-0.042	-0.11	0.978575	0.37432	0.808245
1209	lcl|c229482_g2_i3|m.14286	150	6	4	8	5	9	8	10	5	9	4	10	13	13	7	14	9	14	8	-0.45	-2.9645	0	0.608697	0
1210	lcl|c229496_g2_i3|m.14311	854	0	0	0	0	0	0	0	1	0	0	0	0	0	0	0	0	0	0	-0.104	-0.2533	0.998919	0.48887	0.758955
1211	lcl|c229503_g1_i3|m.14339	303	0	2	0	0	0	2	0	3	0	1	0	0	0	0	0	2	0	1	0.225	0.6195	0.050313	0.004645	0.749494
1212	lcl|c229503_g1_i5|m.14340	265	0	1	0	0	0	1	0	0	0	0	0	0	0	0	0	0	0	0	-0.108	-0.2568	0.999007	0.491265	0.757304
1213	lcl|c229507_g2_i4|m.14343	387	0	2	1	0	0	0	1	1	1	1	2	1	1	3	1	2	1	2	0.171	0.4894	0.141862	0.015247	0.773621
1214	lcl|c229514_g2_i1|m.14352	1026	0	0	0	0	0	0	0	0	0	0	0	0	0	0	0	0	0	0	-0.145	-0.3094	1	0.524707	0.72943
1215	lcl|c229532_g3_i4|m.14360	436	36	46	61	62	51	60	65	54	48	58	58	41	60	59	54	73	66	72	-0.058	-0.9409	0.468846	0.65268	0.078697
1216	lcl|c229534_g2_i7|m.14365	583	0	0	0	0	0	0	0	0	0	0	0	1	0	1	0	0	0	3	0.014	0.0353	0.884553	0.241194	0.828442
1217	lcl|c229538_g7_i4|m.14373	442	2	3	4	7	4	7	7	3	3	5	2	5	3	5	1	5	5	8	0.291	1.3016	9e-06	0	0.669412
1218	lcl|c229550_g1_i3|m.14392	450	22	17	18	31	28	46	33	49	17	47	30	33	22	54	32	44	30	53	0.373	4.6563	0	0	0.602854
1219	lcl|c229550_g1_i3|m.14393	235	10	12	7	16	11	21	20	20	11	22	19	17	11	27	15	28	19	27	0.335	3.1551	0	0	0.608902
1220	lcl|c229561_g1_i12|m.14408	590	11	12	20	20	11	19	15	18	10	17	13	20	11	19	17	10	10	10	0.103	0.879	0.003569	0.000255	0.710164
1221	lcl|c229563_g2_i2|m.14411	651	0	0	3	2	0	4	0	2	0	3	0	0	0	0	0	0	0	0	0.132	0.3576	0.323187	0.042476	0.798716
1222	lcl|c229579_g3_i1|m.14426	186	4	3	4	1	4	5	5	4	3	3	7	1	7	7	7	7	6	9	-0.244	-1.1869	0.087283	0.641895	0.009495
1223	lcl|c229582_g6_i2|m.14430	302	0	0	0	0	0	0	0	0	0	0	0	0	0	0	0	0	0	0	-0.139	-0.3274	1	0.53504	0.718495
1224	lcl|c229583_g3_i7|m.14431	631	0	0	0	0	0	1	0	0	0	0	0	1	0	0	0	0	0	0	-0.131	-0.3094	1	0.524707	0.72943
1225	lcl|c229588_g3_i1|m.14433	619	0	0	0	0	0	0	0	0	0	0	0	1	0	0	0	0	0	0	-0.164	-0.4007	1	0.571486	0.665629
1226	lcl|c229592_g3_i11|m.14442	600	3	1	0	0	1	1	3	4	0	3	3	7	4	6	7	4	3	7	0.167	0.656	0.036261	0.003224	0.743179
1227	lcl|c229615_g3_i4|m.14451	643	2	3	7	7	5	6	13	9	3	5	6	8	6	5	2	1	9	9	-0.111	-0.5639	1	0.624595	0.494182
1228	lcl|c229623_g1_i7|m.14454	200	0	0	0	0	0	0	0	1	0	0	0	0	1	0	0	0	0	0	-0.109	-0.2652	0.999494	0.49693	0.753241
1229	lcl|c229625_g1_i5|m.14457	440	1	1	2	2	2	1	0	1	2	1	1	1	1	1	2	3	2	2	-0.172	-0.4997	1	0.607752	0.570486
1230	lcl|c229642_g3_i10|m.14473	251	0	1	0	1	2	0	0	0	1	0	1	0	1	0	0	0	0	0	-0.166	-0.41	1	0.575494	0.657891
1231	lcl|c229664_g4_i13|m.14491	460	0	0	0	0	0	0	0	0	0	1	0	0	0	0	0	0	0	0	-0.15	-0.3678	1	0.556219	0.69109
1232	lcl|c229670_g1_i2|m.14513	145	2	2	3	5	3	3	5	5	4	5	3	2	2	4	5	4	4	6	0.036	0.1597	0.702842	0.14042	0.826428
1233	lcl|c229675_g2_i2|m.14520	205	0	1	0	0	0	0	0	0	0	0	0	0	0	0	0	0	0	0	-0.126	-0.3228	1	0.532453	0.721361
1234	lcl|c229676_g1_i1|m.14524	349	5	7	11	8	8	11	13	9	9	10	14	4	11	10	14	7	10	8	-0.336	-2.1688	0	0.615084	0
1235	lcl|c229692_g2_i9|m.14545	398	0	1	0	0	2	1	1	0	0	0	0	0	0	2	0	0	0	1	-0.134	-0.3596	1	0.552141	0.696987
1236	lcl|c229705_g1_i1|m.14556	252	0	0	0	0	0	0	0	0	0	0	0	0	0	0	0	1	0	0	-0.156	-0.377	1	0.560663	0.684265
1237	lcl|c229735_g7_i1|m.14573	187	1	2	5	7	6	5	4	7	4	8	4	15	8	7	8	6	9	9	0.22	1.2142	3.8e-05	2e-06	0.676259
1238	lcl|c229751_g1_i2|m.14592	603	13	17	19	16	18	20	22	13	15	19	17	10	21	23	15	12	26	18	-0.221	-1.9483	4e-06	0.618465	0
1239	lcl|c229768_g1_i6|m.14605	304	3	8	6	8	4	5	6	10	8	10	6	7	7	6	5	3	7	6	0.066	0.3695	0.30302	0.039013	0.796528
1240	lcl|c229776_g6_i2|m.14612	780	0	1	0	0	1	0	0	1	0	0	1	0	0	0	0	0	0	0	-0.19	-0.4679	1	0.597576	0.604141
1241	lcl|c229781_g4_i1|m.14624	173	0	1	0	0	0	1	0	2	0	0	1	0	0	0	0	0	0	0	0.021	0.0494	0.86886	0.228666	0.829033
1242	lcl|c229808_g4_i2|m.14641	664	0	1	1	0	1	1	0	1	1	1	1	0	1	0	1	0	0	1	-0.166	-0.4089	1	0.575026	0.658819
1243	lcl|c229833_g1_i3|m.14669	216	1	0	1	2	1	1	1	2	1	1	0	0	2	1	2	2	2	1	-0.089	-0.2473	0.998497	0.484713	0.761729
1244	lcl|c229874_g1_i3|m.14714	147	0	0	0	0	0	0	0	0	0	0	0	0	0	0	0	0	0	0	-0.147	-0.3655	1	0.555086	0.692761
1245	lcl|c229881_g6_i6|m.14719	493	22	31	33	33	25	41	37	43	33	45	24	21	28	47	31	26	24	31	0.1	1.1852	5.9e-05	3e-06	0.678662
1246	lcl|c229886_g1_i1|m.14723	167	0	0	0	0	1	1	1	3	0	1	2	3	0	2	1	1	0	1	0.174	0.4665	0.166493	0.018456	0.778031
1247	lcl|c229886_g1_i2|m.14724	195	0	0	0	0	1	1	1	5	0	1	2	3	0	2	1	1	0	1	0.306	0.8511	0.004911	0.000361	0.713766
1248	lcl|c229886_g1_i6|m.14730	168	1	0	0	0	2	2	2	4	1	2	3	3	1	3	2	1	0	1	0.138	0.4466	0.190254	0.021692	0.78187
1249	lcl|c229904_g1_i2|m.14752	721	3	6	5	5	3	8	5	6	4	9	4	0	5	4	4	7	5	5	0.154	0.7688	0.011998	0.000955	0.72526
1250	lcl|c229913_g3_i1|m.14763	435	0	0	0	1	1	1	1	0	5	1	5	0	3	0	4	1	4	0	-0.936	-2.5199	0	0.611073	0
1251	lcl|c229917_g4_i4|m.14770	568	4	5	10	9	4	9	5	4	3	4	14	9	12	9	10	12	12	12	-0.077	-0.4704	1	0.598423	0.601601
1252	lcl|c229919_g2_i1|m.14772	158	0	1	1	2	0	1	0	0	1	1	1	0	0	1	1	0	1	0	-0.022	-0.0518	0.954152	0.321232	0.819554
1253	lcl|c229937_g4_i6|m.14792	574	0	0	0	0	0	1	0	0	0	1	0	0	0	0	0	0	0	0	-0.102	-0.258	0.999124	0.492082	0.756733
1254	lcl|c229995_g2_i2|m.14841	477	0	0	0	1	1	0	1	1	1	1	0	0	1	1	0	1	0	0	-0.129	-0.3093	1	0.524648	0.729489
1255	lcl|c230000_g8_i2|m.14843	129	0	0	0	0	2	1	0	0	1	0	1	3	2	1	0	0	0	2	-0.041	-0.1108	0.97883	0.375034	0.808058
1256	lcl|c230011_g2_i5|m.14861	291	2	4	4	5	3	3	3	3	1	2	1	2	2	1	2	3	3	6	0.207	0.725	0.01874	0.001556	0.731922
1257	lcl|c230032_g6_i1|m.14874	120	0	1	1	2	0	2	2	3	0	2	1	5	2	3	2	2	3	4	0.388	1.3127	8e-06	0	0.66858
1258	lcl|c230033_g1_i4|m.14876	316	0	1	0	0	0	0	0	0	1	0	1	0	0	0	0	0	0	0	-0.132	-0.3322	1	0.537701	0.715451
1259	lcl|c230034_g1_i1|m.14877	152	0	0	1	2	1	2	1	4	2	1	3	3	0	1	3	3	0	1	0.152	0.455	0.179957	0.020272	0.78025
1260	lcl|c230039_g1_i2|m.14881	293	2	1	4	2	1	1	0	2	2	3	5	2	1	2	3	1	2	1	-0.396	-1.2734	0.039615	0.637805	0.003854
1261	lcl|c230054_g1_i7|m.14897	550	3	2	5	3	4	5	4	7	0	2	3	7	1	3	5	9	2	5	0.315	1.3595	3e-06	0	0.66515
1262	lcl|c230065_g1_i2|m.14908	120	4	4	5	5	5	5	8	5	6	5	8	6	8	7	6	5	6	9	-0.179	-0.9283	0.497905	0.653004	0.086097
1263	lcl|c230073_g1_i10|m.14919	555	0	0	1	1	1	1	1	0	1	0	0	0	1	0	1	0	0	1	-0.122	-0.3037	1	0.521318	0.732737
1264	lcl|c230102_g4_i1|m.14957	224	8	10	13	14	11	14	10	9	13	8	15	14	14	12	18	13	11	13	-0.143	-1.0218	0.298916	0.64977	0.042302
1265	lcl|c230110_g2_i2|m.14961	1969	0	1	3	2	3	5	4	2	4	1	4	3	2	2	3	1	2	6	-0.212	-0.7953	0.79249	0.652808	0.197719
1266	lcl|c230124_g3_i6|m.14973	838	6	14	8	12	11	17	14	22	14	18	12	10	10	17	12	12	14	15	0.188	1.4172	1e-06	0	0.661085
1267	lcl|c230136_g1_i1|m.14983	462	1	1	2	1	1	2	0	2	0	2	2	3	0	4	0	2	2	4	0.394	1.2152	3.7e-05	2e-06	0.676177
1268	lcl|c230150_g4_i2|m.14989	367	1	2	0	4	5	2	4	5	2	3	4	3	2	4	5	3	0	2	-0.008	-0.0328	0.942734	0.303617	0.822288
1269	lcl|c230163_g1_i1|m.15005	339	3	4	2	1	4	5	4	7	6	4	3	3	3	5	3	2	3	5	0.004	0.0189	0.901218	0.255992	0.827466
1270	lcl|c230171_g1_i1|m.15015	207	1	0	0	0	2	0	1	1	0	0	0	3	0	1	1	2	1	0	0.047	0.1321	0.7509	0.160539	0.828198
1271	lcl|c230175_g2_i2|m.15021	656	0	0	0	0	0	0	0	0	0	0	0	0	0	0	0	0	0	0	-0.177	-0.4221	1	0.58051	0.647458
1272	lcl|c230178_g1_i2|m.15028	291	0	1	0	0	1	0	0	0	0	0	1	0	0	2	0	0	1	0	-0.081	-0.2124	0.996214	0.459331	0.776517
1273	lcl|c230184_g2_i3|m.15031	258	0	0	1	1	1	1	2	1	0	1	1	1	0	1	2	0	1	0	-0.307	-0.7859	0.809903	0.652466	0.207941
1274	lcl|c230186_g5_i1|m.15032	517	0	0	0	1	0	1	1	1	0	0	1	2	1	3	1	1	1	2	0.157	0.4273	0.215423	0.025272	0.785587
1275	lcl|c230192_g3_i5|m.15041	754	0	0	0	0	0	0	0	0	0	0	0	0	0	0	0	0	0	0	-0.139	-0.3301	1	0.536542	0.71679
1276	lcl|c230197_g3_i5|m.15044	143	3	2	2	4	3	7	2	4	5	6	1	2	3	4	4	2	2	3	0.185	0.7418	0.015833	0.001293	0.729322
1277	lcl|c230220_g1_i3|m.15065	191	0	2	0	0	0	2	0	1	0	2	0	1	0	0	0	0	0	1	0.115	0.2834	0.461385	0.069805	0.811442
1278	lcl|c230220_g1_i6|m.15071	237	0	1	2	1	0	2	1	3	0	3	0	2	0	0	1	4	1	1	0.376	1.1001	0.000207	1.2e-05	0.686179
1279	lcl|c230233_g2_i1|m.15093	294	0	1	0	0	0	1	0	1	0	0	0	0	0	0	0	0	0	0	-0.079	-0.1905	0.994118	0.442387	0.784694
1280	lcl|c230270_g1_i2|m.15107	782	2	0	2	3	0	2	2	0	2	1	1	4	1	2	1	0	2	2	0.053	0.1567	0.70825	0.142534	0.826653
1281	lcl|c230276_g3_i1|m.15112	226	0	0	1	1	0	0	0	0	1	0	1	1	1	2	0	1	0	0	-0.069	-0.1661	0.990939	0.422648	0.792872
1282	lcl|c230280_g4_i1|m.15118	203	0	1	1	1	1	0	0	0	2	0	0	0	1	0	1	0	1	2	-0.103	-0.2559	0.998977	0.490651	0.757731
1283	lcl|c230296_g1_i2|m.15136	266	0	0	2	0	3	2	3	3	4	2	4	0	7	2	4	4	5	4	-0.543	-2.0129	1e-06	0.617412	0
1284	lcl|c230355_g4_i3|m.15198	234	11	14	19	18	19	19	20	18	17	20	17	25	25	28	21	21	27	22	-0.052	-0.5038	1	0.60897	0.565937
1285	lcl|c230360_g10_i5|m.15205	379	2	4	2	2	1	2	2	2	1	2	1	1	0	1	1	1	1	0	0.1	0.284	0.460209	0.069542	0.811347
1286	lcl|c230386_g2_i1|m.15223	386	0	0	2	3	2	8	2	5	3	2	6	5	2	3	4	3	2	1	0.15	0.584	0.068158	0.006537	0.755854
1287	lcl|c230398_g2_i10|m.15236	140	0	0	0	0	0	0	0	0	3	3	0	0	1	4	0	0	0	0	0.066	0.1834	0.658898	0.12437	0.824386
1288	lcl|c230398_g2_i4|m.15241	142	0	1	0	0	0	0	1	0	6	2	0	0	3	5	1	1	1	1	-0.25	-0.7614	0.85188	0.651314	0.235878
1289	lcl|c230398_g2_i8|m.15247	171	1	5	0	0	0	0	1	0	16	3	0	0	7	8	1	0	1	2	-0.397	-1.5546	0.001698	0.627167	0.000117
1290	lcl|c230405_g2_i9|m.15259	115	0	0	0	0	1	1	0	1	1	0	0	1	1	1	0	1	1	0	-0.136	-0.3331	1	0.538196	0.714873
1291	lcl|c230406_g3_i1|m.15260	229	1	3	5	4	2	2	4	2	2	2	3	1	4	3	0	0	1	1	-0.26	-0.8724	0.628213	0.653836	0.12538
1292	lcl|c230411_g4_i1|m.15261	800	0	0	0	0	0	0	0	1	0	1	0	0	0	0	0	0	0	0	-0.123	-0.2977	1	0.517688	0.736142
1293	lcl|c230412_g8_i4|m.15270	165	0	0	0	0	1	1	0	1	0	0	0	0	0	0	2	0	1	2	-0.044	-0.1119	0.979171	0.376014	0.807799
1294	lcl|c230414_g1_i1|m.15275	329	1	2	6	4	4	6	4	3	2	6	0	4	2	2	2	3	1	4	0.251	0.9599	0.001347	8.9e-05	0.700506
1295	lcl|c230434_g3_i1|m.15297	255	0	0	0	0	0	0	0	0	0	0	0	0	0	0	0	0	0	0	-0.12	-0.2926	1	0.514554	0.738973
1296	lcl|c230438_g3_i4|m.15312	399	0	0	0	0	0	0	0	0	0	0	0	1	0	1	0	0	0	0	-0.127	-0.3263	1	0.534425	0.719185
1297	lcl|c230481_g5_i1|m.15356	217	10	9	11	12	12	15	10	14	11	14	17	8	10	11	10	11	11	18	-0.009	-0.0667	0.961823	0.334994	0.817086
1298	lcl|c230498_g3_i2|m.15368	179	3	5	14	12	11	10	12	7	7	8	5	2	5	6	4	10	7	10	-0.081	-0.4826	1	0.602442	0.588945
1299	lcl|c230632_g1_i6|m.15498	263	1	0	1	3	0	3	0	2	0	4	1	5	0	3	1	0	0	2	0.726	2.3631	0	0	0.622343
1300	lcl|c230636_g2_i1|m.15503	271	1	2	3	1	4	2	1	3	4	1	3	1	2	2	2	2	2	4	-0.287	-1.0502	0.248834	0.648514	0.033425
1301	lcl|c230672_g2_i1|m.15530	341	0	1	1	2	1	2	1	1	3	1	1	1	1	1	0	1	1	2	-0.036	-0.0937	0.973176	0.359669	0.81187
1302	lcl|c230742_g3_i4|m.15574	406	0	0	0	0	0	1	1	2	0	1	0	0	0	0	0	0	0	0	-0.081	-0.2091	0.995892	0.456826	0.777802
1303	lcl|c230758_g1_i1|m.15596	263	0	5	3	3	3	4	2	2	5	2	4	4	4	2	3	3	3	4	-0.062	-0.2373	0.997894	0.477649	0.766197
1304	lcl|c230767_g4_i2|m.15603	166	0	0	0	0	0	1	0	1	0	0	0	0	0	0	1	0	0	0	-0.122	-0.296	1	0.516648	0.737091
1305	lcl|c230771_g2_i1|m.15607	248	1	0	8	7	5	2	6	8	6	8	6	5	4	5	3	1	1	1	-0.168	-0.7389	0.885724	0.649904	0.263034
1306	lcl|c230792_g1_i1|m.15630	332	1	1	0	0	0	1	0	0	1	3	0	0	2	3	0	0	4	3	-0.015	-0.0446	0.950052	0.314562	0.820644
1307	lcl|c230812_g4_i3|m.15653	518	0	0	0	0	0	0	0	0	0	0	0	0	0	0	1	0	0	0	-0.14	-0.3404	1	0.542156	0.710121
1308	lcl|c230819_g2_i9|m.15669	621	0	0	0	0	0	0	0	0	0	0	0	0	0	0	0	0	0	0	-0.157	-0.3797	1	0.561941	0.682219
1309	lcl|c230823_g3_i1|m.15672	350	26	39	19	35	28	41	31	42	35	52	52	23	40	61	40	57	46	74	0.199	2.8977	0	0	0.611475
1310	lcl|c230829_g2_i2|m.15680	763	2	1	3	4	1	3	2	4	1	4	0	2	0	4	0	1	0	1	0.389	1.1996	4.7e-05	3e-06	0.677459
1311	lcl|c230862_g3_i1|m.15714	479	1	1	1	2	2	3	3	4	4	0	1	2	2	1	2	1	2	2	-0.162	-0.5047	1	0.609235	0.564933
1312	lcl|c230880_g3_i5|m.15737	268	1	2	1	0	1	0	1	6	1	3	3	5	2	1	3	0	0	1	0.297	0.9717	0.001161	7.6e-05	0.699189
1313	lcl|c230889_g5_i1|m.15746	225	0	0	0	0	0	0	0	0	0	0	0	0	0	0	0	0	0	0	-0.068	-0.1682	0.991216	0.424381	0.792206
1314	lcl|c230890_g2_i1|m.15747	369	0	0	0	0	0	0	0	0	0	0	0	0	0	1	0	0	0	0	-0.167	-0.4108	1	0.575832	0.657214
1315	lcl|c230944_g4_i1|m.15814	199	1	0	0	0	0	0	1	0	0	0	0	0	0	0	0	0	1	1	-0.093	-0.224	0.997086	0.467993	0.771849
1316	lcl|c230947_g2_i4|m.15815	352	0	0	0	0	0	0	0	0	0	0	0	0	0	0	0	0	0	0	-0.126	-0.3155	1	0.528272	0.725808
1317	lcl|c230960_g1_i5|m.15839	304	2	4	1	4	6	5	3	5	5	5	2	7	3	2	3	6	4	7	0.321	1.4514	1e-06	0	0.658758
1318	lcl|c230982_g4_i7|m.15848	206	1	1	0	1	0	1	1	0	1	1	1	0	1	1	0	1	0	1	-0.121	-0.3083	1	0.524058	0.730074
1319	lcl|c230991_g1_i1|m.15860	187	0	0	0	1	2	2	0	0	0	0	0	0	1	1	0	1	0	1	-0.126	-0.32	1	0.53086	0.723082
1320	lcl|c231009_g5_i3|m.15884	1173	1	0	1	1	0	0	1	0	1	0	0	0	1	0	0	0	0	0	-0.172	-0.4073	1	0.574344	0.660163
1321	lcl|c231030_g9_i1|m.15904	395	0	0	1	1	0	1	1	2	0	1	0	2	0	2	0	0	0	0	0.146	0.3576	0.323187	0.042476	0.798716
1322	lcl|c231043_g3_i4|m.15925	505	3	14	10	12	7	15	9	20	14	8	8	23	11	19	7	7	12	16	0.398	2.6586	0	0	0.615489
1323	lcl|c231052_g3_i3|m.15929	350	5	9	11	10	5	9	15	13	6	9	10	8	12	10	11	7	9	10	-0.09	-0.6323	0.985793	0.637831	0.403735
1324	lcl|c231068_g6_i2|m.15939	583	40	59	66	95	56	97	71	95	58	94	56	91	52	86	74	92	50	86	0.318	5.8118	0	0	0.601148
1325	lcl|c231083_g2_i1|m.15952	313	0	0	0	0	0	1	0	1	1	0	1	1	1	0	0	0	0	0	-0.11	-0.2847	1	0.509608	0.743248
1326	lcl|c231085_g3_i1|m.15955	220	7	1	6	2	9	2	6	0	6	1	20	2	10	0	12	1	11	2	-1.792	-6.7927	0	0.6014	0
1327	lcl|c231102_g1_i6|m.15966	192	0	0	0	0	1	1	0	1	0	0	1	1	0	0	1	0	0	0	-0.093	-0.2243	0.9971	0.468214	0.771725
1328	lcl|c231142_g1_i4|m.15993	389	5	10	4	12	8	9	11	8	10	10	5	1	12	11	6	6	13	13	-0.044	-0.2922	1	0.514306	0.739193
1329	lcl|c231190_g4_i3|m.16030	411	4	3	6	4	4	5	8	18	4	4	4	3	2	4	5	5	4	2	0.04	0.1985	0.629952	0.114759	0.822853
1330	lcl|c231190_g4_i6|m.16031	350	5	3	6	6	6	7	12	21	4	5	5	3	2	6	5	6	6	2	0.017	0.094	0.810516	0.190618	0.829461
1331	lcl|c231210_g4_i4|m.16042	202	4	6	6	6	3	5	4	4	3	7	3	5	3	3	5	1	4	3	0.004	0.0166	0.903405	0.258084	0.827304
1332	lcl|c231225_g3_i3|m.16055	174	0	0	0	1	0	0	0	0	0	0	0	0	0	1	0	0	0	1	-0.102	-0.244	0.998377	0.482401	0.763225
1333	lcl|c231252_g2_i1|m.16075	227	0	0	0	0	0	0	1	0	0	0	2	1	1	1	1	1	0	2	-0.089	-0.2325	0.997687	0.474199	0.768275
1334	lcl|c231257_g1_i5|m.16082	423	0	7	1	1	4	4	3	2	5	2	1	1	3	6	0	2	2	1	0.059	0.2132	0.60116	0.10587	0.8212
1335	lcl|c231281_g6_i3|m.16097	137	28	22	30	39	30	39	35	47	31	34	27	31	29	39	37	33	36	34	0.018	0.2146	0.598408	0.105048	0.821034
1336	lcl|c231285_g1_i2|m.16098	374	0	0	0	0	0	0	1	0	0	0	0	1	1	1	0	0	1	0	-0.149	-0.3626	1	0.553646	0.69485
1337	lcl|c231313_g2_i1|m.16122	286	0	0	0	1	1	1	0	0	0	0	0	0	0	0	0	0	0	0	-0.173	-0.4146	1	0.577426	0.653974
1338	lcl|c231326_g2_i1|m.16129	332	0	5	3	7	3	6	6	3	3	0	2	3	2	5	3	3	6	6	0.17	0.706	0.022594	0.001911	0.734929
1339	lcl|c231339_g4_i2|m.16143	424	4	4	3	3	4	5	4	5	2	1	3	3	4	3	2	3	2	5	0.03	0.1161	0.776976	0.172863	0.828902
1340	lcl|c231341_g2_i3|m.16145	313	0	0	0	0	0	0	0	0	0	0	1	0	0	0	0	0	0	0	-0.137	-0.3506	1	0.547538	0.703259
1341	lcl|c231352_g2_i1|m.16156	246	5	7	7	10	4	4	8	8	5	9	7	8	6	7	15	17	8	9	0.104	0.5996	0.059757	0.005635	0.753034
1342	lcl|c231364_g6_i1|m.16162	433	2	1	0	2	8	8	5	6	5	5	6	10	6	9	7	7	9	10	0.075	0.3955	0.261425	0.03223	0.791658
1343	lcl|c231378_g1_i2|m.16165	1155	0	0	0	3	0	0	0	4	0	0	0	0	0	0	0	0	0	2	0.252	0.6564	0.036128	0.003211	0.743111
1344	lcl|c231380_g1_i2|m.16168	107	0	1	0	0	0	0	1	0	2	1	0	0	2	3	1	0	1	1	-0.131	-0.3577	1	0.55118	0.698328
1345	lcl|c231403_g3_i11|m.16209	130	0	0	0	0	0	0	0	0	0	0	0	0	0	0	0	0	0	0	-0.093	-0.2212	0.996899	0.465922	0.772998
1346	lcl|c231430_g2_i1|m.16231	492	1	4	2	2	3	3	2	1	2	3	3	0	4	2	2	1	4	4	-0.219	-0.765	0.845969	0.651508	0.23166
1347	lcl|c231430_g2_i6|m.16242	528	4	10	13	12	12	12	11	14	7	12	7	2	10	8	6	7	7	6	-0.035	-0.2273	0.997232	0.470416	0.770477
1348	lcl|c231440_g4_i2|m.16256	426	1	1	2	2	2	2	2	4	1	1	2	2	2	0	3	1	2	3	-0.107	-0.3546	1	0.5496	0.700496
1349	lcl|c231445_g1_i1|m.16259	328	0	1	0	0	1	1	0	3	0	0	0	0	0	0	0	0	0	0	0.001	0.0016	0.916911	0.271808	0.826094
1350	lcl|c231460_g1_i4|m.16283	127	0	0	1	0	2	1	1	0	0	0	2	4	2	4	1	4	3	4	0.305	0.9571	0.001395	9.3e-05	0.700822
1351	lcl|c231462_g1_i10|m.16284	425	0	2	0	0	2	2	0	0	0	1	1	0	2	2	0	0	0	2	-0.022	-0.0576	0.957259	0.326597	0.818627
1352	lcl|c231469_g3_i4|m.16290	279	1	3	1	4	3	5	3	2	2	3	4	4	3	5	6	4	2	4	0.194	0.7705	0.011787	0.000937	0.725009
1353	lcl|c231477_g1_i1|m.16301	377	13	11	10	12	18	20	19	12	17	11	14	20	20	30	21	17	20	23	-0.062	-0.54	1	0.618865	0.523801
1354	lcl|c231506_g1_i1|m.16344	344	2	1	1	2	0	2	1	2	1	3	0	3	1	4	1	3	0	2	0.52	1.4679	0	0	0.657656
1355	lcl|c231559_g1_i5|m.16408	425	7	5	14	16	4	16	13	34	6	19	8	26	3	12	8	9	4	10	0.693	4.5242	0	0	0.603196
1356	lcl|c231575_g5_i2|m.16426	291	0	0	0	2	0	1	3	1	2	1	2	3	3	2	1	1	2	2	-0.199	-0.5615	1	0.624047	0.497215
1357	lcl|c231577_g2_i2|m.16429	176	0	1	0	0	0	0	3	0	0	0	0	0	0	0	0	0	0	0	-0.244	-0.5939	0.999776	0.630963	0.455299
1358	lcl|c231579_g2_i1|m.16430	130	0	0	0	0	0	0	0	0	0	0	0	0	0	0	0	0	0	0	-0.126	-0.3077	1	0.523702	0.730424
1359	lcl|c231601_g3_i1|m.16437	117	0	0	1	0	1	0	0	1	1	1	1	0	1	1	1	0	0	1	-0.095	-0.2331	0.997721	0.474632	0.768018
1360	lcl|c231602_g3_i14|m.16438	525	1	0	0	0	0	0	2	2	0	1	1	0	1	0	1	0	1	1	-0.117	-0.2999	1	0.519027	0.734903
1361	lcl|c231604_g1_i1|m.16440	966	0	0	0	0	0	0	0	0	0	0	0	0	0	1	0	0	0	0	-0.143	-0.3362	1	0.539888	0.712871
1362	lcl|c231615_g6_i2|m.16452	127	0	1	0	2	2	2	0	3	0	2	0	3	0	0	0	0	0	0	0.284	0.8186	0.007049	0.000535	0.718148
1363	lcl|c231621_g3_i3|m.16453	264	0	0	1	3	0	0	0	1	0	0	1	0	0	0	0	0	2	2	0.034	0.0883	0.81872	0.195325	0.829525
1364	lcl|c231634_g1_i2|m.16472	1063	7	10	10	18	7	20	22	24	8	8	3	18	8	19	9	17	10	20	0.488	3.7347	0	0	0.605599
1365	lcl|c231634_g1_i5|m.16478	373	3	3	4	6	2	5	5	8	2	3	2	5	3	5	3	6	3	7	0.426	1.8588	0	0	0.636705
1366	lcl|c231694_g3_i2|m.16524	191	1	1	0	3	2	1	1	3	1	1	2	2	3	2	1	1	3	0	-0.119	-0.3475	1	0.54592	0.705372
1367	lcl|c231698_g2_i1|m.16532	177	1	1	0	0	1	0	1	0	1	1	0	0	1	0	1	0	0	0	-0.12	-0.3084	1	0.524117	0.730016
1368	lcl|c231701_g4_i6|m.16535	262	0	0	0	0	0	1	0	0	0	0	0	0	0	0	0	0	0	0	-0.128	-0.3195	1	0.530574	0.723387
1369	lcl|c231732_g6_i1|m.16569	347	0	0	0	1	1	1	2	3	0	2	0	0	0	1	0	0	0	0	-0.022	-0.0583	0.957618	0.327244	0.818512
1370	lcl|c231737_g1_i3|m.16576	191	5	6	13	11	12	11	10	11	8	7	6	8	6	7	8	6	6	6	-0.109	-0.6562	0.971239	0.641389	0.371324
1371	lcl|c231738_g2_i1|m.16579	590	1	0	1	1	0	1	0	1	1	0	1	3	0	0	1	1	2	2	0.029	0.076	0.835611	0.205649	0.829546
1372	lcl|c231739_g1_i3|m.16580	253	1	3	8	8	5	8	4	5	3	6	6	5	3	4	4	6	2	3	0.176	0.8498	0.004984	0.000367	0.713937
1373	lcl|c231789_g3_i2|m.16623	804	1	1	1	2	3	4	0	0	0	0	1	1	0	0	3	1	2	1	-0.175	-0.5214	1	0.613972	0.545885
1374	lcl|c231808_g9_i1|m.16644	155	1	0	0	0	1	1	0	1	1	1	1	1	2	1	1	1	1	1	-0.179	-0.4478	1	0.590451	0.623903
1375	lcl|c231811_g3_i1|m.16645	663	0	0	0	0	0	1	0	0	0	0	0	1	0	0	0	1	0	0	-0.142	-0.3589	1	0.551788	0.697482
1376	lcl|c231821_g3_i1|m.16651	451	6	3	7	10	5	9	3	9	1	7	5	5	2	9	3	2	4	3	0.332	1.667	0	0	0.645614
1377	lcl|c231850_g1_i1|m.16700	188	0	1	0	0	0	1	0	0	0	0	0	0	0	0	0	0	0	0	-0.122	-0.3124	1	0.526469	0.727659
1378	lcl|c231859_g5_i5|m.16713	398	1	2	4	0	2	6	3	3	2	2	2	1	2	1	3	1	4	0	-0.298	-1.0088	0.323717	0.650314	0.046975
1379	lcl|c231864_g5_i1|m.16720	313	1	2	2	1	1	2	1	1	1	2	1	1	1	0	2	2	1	2	0.067	0.1841	0.657573	0.123914	0.824319
1380	lcl|c231881_g1_i2|m.16748	469	8	16	10	14	15	15	12	12	12	16	12	9	14	18	9	14	7	11	0.116	0.8748	0.003746	0.000269	0.710697
1381	lcl|c231884_g4_i1|m.16750	129	0	0	0	0	0	0	0	0	0	0	0	0	0	0	0	0	0	0	-0.056	-0.1375	0.98568	0.39847	0.801285
1382	lcl|c231890_g3_i1|m.16757	159	0	0	0	0	0	0	0	0	0	0	0	0	0	0	0	0	0	0	-0.115	-0.2717	0.999902	0.501229	0.749999
1383	lcl|c231891_g1_i1|m.16759	301	2	1	3	1	0	1	1	3	2	2	1	2	2	4	2	2	2	2	-0.012	-0.0356	0.944538	0.306215	0.821914
1384	lcl|c231896_g2_i12|m.16763	298	0	0	0	0	2	0	1	0	0	1	1	0	3	2	1	2	2	0	-0.268	-0.7663	0.843849	0.651575	0.230147
1385	lcl|c231904_g1_i7|m.16777	327	5	6	9	9	5	8	5	5	8	9	4	3	10	7	4	2	5	4	-0.16	-0.8842	0.600865	0.653753	0.11618
1386	lcl|c231907_g1_i1|m.16778	150	0	0	1	0	0	0	0	1	0	0	1	0	0	0	0	0	0	0	-0.12	-0.2957	1	0.516464	0.737258
1387	lcl|c231929_g5_i1|m.16788	187	0	0	0	0	0	0	0	0	0	0	0	0	0	0	0	0	0	0	-0.106	-0.2453	0.998413	0.483314	0.762638
1388	lcl|c231929_g5_i4|m.16789	176	2	0	1	1	2	1	2	2	1	0	0	0	1	2	0	0	1	1	-0.181	-0.4657	1	0.596823	0.606362
1389	lcl|c231931_g2_i1|m.16792	399	19	21	26	27	16	22	20	32	26	30	21	24	22	32	23	30	17	23	0.134	1.3706	3e-06	0	0.664354
1390	lcl|c231963_g1_i7|m.16837	608	25	40	26	29	25	41	30	34	39	42	21	16	36	42	22	25	22	30	0.072	0.8029	0.00836	0.000644	0.720337
1391	lcl|c231967_g1_i2|m.16842	529	0	1	4	7	3	5	6	8	4	6	4	2	3	6	5	5	6	7	0.137	0.6227	0.048919	0.004501	0.748931
1392	lcl|c231971_g1_i1|m.16848	309	0	0	0	0	0	0	1	0	0	0	0	0	0	0	0	0	0	0	-0.116	-0.2757	1	0.503839	0.747959
1393	lcl|c231981_g4_i6|m.16864	210	0	0	0	0	0	1	1	0	0	1	1	1	0	0	1	0	0	0	-0.118	-0.2715	0.999892	0.501098	0.7501
1394	lcl|c231982_g2_i3|m.16868	395	0	0	0	1	0	0	0	0	1	0	0	0	0	0	0	0	0	0	-0.156	-0.3864	1	0.565062	0.677057
1395	lcl|c231996_g3_i3|m.16899	366	1	5	5	5	6	6	3	3	3	5	3	5	3	4	5	1	3	4	0.065	0.2772	0.473643	0.072573	0.81241
1396	lcl|c231997_g2_i3|m.16900	391	2	3	2	4	2	6	4	6	3	4	5	11	5	4	7	6	4	6	0.288	1.3884	2e-06	0	0.663092
1397	lcl|c232008_g1_i2|m.16909	654	0	0	0	0	0	2	1	1	0	2	1	1	0	1	0	0	0	0	0.029	0.0744	0.837734	0.207008	0.829537
1398	lcl|c232046_g3_i8|m.16952	418	42	44	38	40	47	62	47	46	47	53	61	32	54	54	68	61	58	72	-0.089	-1.3269	0.023239	0.635443	0.002118
1399	lcl|c232095_g2_i1|m.16982	129	1	1	5	3	6	7	6	3	3	3	3	0	2	1	3	1	3	3	-0.416	-1.617	0.000755	0.625389	4.8e-05
1400	lcl|c232105_g3_i1|m.16994	237	2	1	5	7	5	5	5	7	1	5	4	2	1	3	4	4	3	5	0.158	0.6691	0.032121	0.002818	0.740971
1401	lcl|c232108_g1_i1|m.16997	226	2	12	5	8	3	8	0	4	3	7	2	2	6	5	1	1	3	4	0.495	2.1894	0	0	0.626662
1402	lcl|c232108_g1_i2|m.16999	226	7	20	15	16	11	15	0	0	12	14	10	8	13	12	3	5	7	11	0.129	0.8557	0.004662	0.000341	0.713162
1403	lcl|c232109_g7_i6|m.17002	210	0	1	1	0	3	3	3	0	3	3	1	2	2	5	1	1	2	4	0.06	0.1986	0.629756	0.114697	0.822842
1404	lcl|c232116_g4_i1|m.17013	250	0	0	0	1	1	2	2	1	0	1	0	4	0	2	2	0	0	1	0.128	0.3458	0.343832	0.046146	0.800854
1405	lcl|c232133_g1_i5|m.17039	210	4	3	9	8	7	6	5	5	6	8	11	2	7	9	13	5	10	5	-0.423	-2.3423	0	0.612869	0
1406	lcl|c232137_g2_i1|m.17041	159	5	5	4	5	8	7	7	13	7	8	10	11	5	6	11	8	10	8	-0.041	-0.2377	0.997936	0.477935	0.766022
1407	lcl|c232181_g4_i2|m.17102	812	1	2	1	2	1	3	2	2	3	2	2	1	3	2	1	1	2	2	-0.078	-0.2388	0.998045	0.47872	0.765539
1408	lcl|c232182_g2_i1|m.17105	131	0	0	0	0	0	0	0	0	0	0	0	0	0	0	0	0	0	0	-0.124	-0.2959	1	0.516587	0.737147
1409	lcl|c232215_g4_i2|m.17149	101	0	0	0	0	0	0	0	0	0	0	1	0	0	0	1	0	0	0	-0.129	-0.321	1	0.531431	0.72247
1410	lcl|c232221_g3_i2|m.17155	495	1	1	1	3	2	3	2	1	0	2	1	1	2	1	2	1	2	0	-0.145	-0.4329	1	0.584804	0.637792
1411	lcl|c232232_g4_i1|m.17169	429	3	4	5	2	5	3	8	2	5	0	10	0	7	4	8	4	8	3	-0.925	-3.8212	0	0.606118	0
1412	lcl|c232241_g6_i1|m.17171	731	0	3	3	6	5	4	8	5	4	2	5	2	2	0	2	4	5	4	-0.206	-0.8839	0.601561	0.653756	0.116408
1413	lcl|c232241_g6_i3|m.17173	558	0	1	1	1	3	0	2	0	0	0	1	0	0	1	0	1	3	1	-0.486	-1.2352	0.056793	0.639575	0.005797
1414	lcl|c232242_g3_i1|m.17174	459	8	10	6	8	7	9	14	8	11	9	10	5	8	8	9	11	10	11	-0.156	-1.0113	0.318851	0.650211	0.046045
1415	lcl|c232249_g2_i1|m.17180	362	22	38	46	42	34	35	33	31	41	33	36	24	36	48	25	17	28	26	-0.134	-1.6285	0.000647	0.625082	4e-05
1416	lcl|c232274_g1_i2|m.17209	416	5	2	4	6	7	6	7	7	6	6	5	7	7	7	6	8	5	7	-0.03	-0.1644	0.990713	0.421241	0.793407
1417	lcl|c232294_g5_i11|m.17226	247	8	6	4	5	2	7	2	6	3	10	0	2	4	10	2	6	2	5	0.556	2.427	0	0	0.620779
1418	lcl|c232294_g5_i11|m.17227	212	0	0	0	0	0	0	0	0	0	1	0	0	0	2	0	0	0	0	-0.067	-0.157	0.989458	0.41507	0.795683
1419	lcl|c232315_g2_i11|m.17243	553	0	0	0	0	0	0	0	0	0	0	0	1	0	1	0	0	0	0	-0.149	-0.3548	1	0.549703	0.700357
1420	lcl|c232318_g1_i1|m.17247	998	0	0	0	0	1	1	0	0	1	0	0	0	1	1	0	0	0	1	-0.138	-0.3335	1	0.538415	0.714616
1421	lcl|c232338_g2_i2|m.17255	352	0	0	1	2	0	0	0	1	0	2	0	2	0	1	1	1	1	0	0.122	0.3023	0.424548	0.061848	0.808386
1422	lcl|c232350_g3_i1|m.17265	590	2	2	2	1	2	2	2	3	3	2	3	0	3	3	2	0	1	1	-0.301	-0.9732	0.396944	0.651669	0.061977
1423	lcl|c232369_g2_i7|m.17306	717	2	1	0	1	2	1	2	2	2	1	1	4	2	4	4	2	2	3	-0.052	-0.1686	0.991289	0.42471	0.792078
1424	lcl|c232381_g2_i3|m.17311	335	5	9	11	17	8	17	12	24	9	21	16	4	7	15	14	24	8	25	0.447	3.4021	0	0	0.607275
1425	lcl|c232401_g7_i2|m.17338	151	4	9	6	6	7	7	7	8	6	8	5	5	4	6	3	2	4	5	0.07	0.3654	0.309909	0.04018	0.797285
1426	lcl|c232405_g1_i1|m.17340	437	0	0	0	0	0	0	0	1	0	0	0	0	0	0	0	0	0	0	-0.121	-0.2998	1	0.518966	0.73496
1427	lcl|c232410_g1_i2|m.17346	164	0	3	2	3	1	1	0	1	0	1	1	0	1	1	0	0	2	1	0.069	0.1851	0.655682	0.123264	0.824222
1428	lcl|c232424_g1_i6|m.17358	266	4	4	2	5	3	7	5	8	4	6	4	4	4	3	3	6	4	6	0.247	1.1334	0.000128	7e-06	0.683147
1429	lcl|c232440_g3_i1|m.17372	175	1	1	1	2	0	1	3	4	0	3	1	2	0	2	0	1	1	4	0.415	1.2169	3.6e-05	2e-06	0.676039
1430	lcl|c232510_g5_i2|m.17446	569	0	0	0	0	1	0	0	0	0	0	0	0	0	0	0	0	0	0	-0.118	-0.2868	1	0.510933	0.742124
1431	lcl|c232511_g1_i6|m.17448	419	0	0	0	1	1	0	0	0	0	1	0	0	1	0	0	0	0	0	-0.142	-0.3445	1	0.54434	0.707393
1432	lcl|c232520_g2_i5|m.17456	567	0	0	0	1	0	2	0	1	0	1	0	0	0	0	0	0	0	0	-0.062	-0.1585	0.989704	0.416327	0.795229
1433	lcl|c232521_g1_i4|m.17458	344	6	11	10	15	21	18	17	18	11	12	6	5	8	7	4	6	9	9	-0.043	-0.2805	1	0.506933	0.745468
1434	lcl|c232532_g2_i6|m.17481	512	0	0	0	0	0	0	1	1	0	1	0	3	1	2	3	1	1	2	0.036	0.0934	0.811386	0.191111	0.82947
1435	lcl|c232537_g3_i1|m.17484	338	0	3	0	2	5	2	0	0	0	1	4	1	2	1	0	0	0	0	-0.35	-1.0087	0.323913	0.650318	0.047013
1436	lcl|c232540_g2_i1|m.17495	902	1	1	0	2	1	0	1	2	0	1	0	0	1	0	0	1	2	1	-0.061	-0.1478	0.987774	0.407298	0.798397
1437	lcl|c232541_g3_i1|m.17498	247	1	0	0	0	0	0	1	0	0	0	0	0	0	0	1	1	0	0	-0.116	-0.2814	1	0.507509	0.744995
1438	lcl|c232555_g1_i2|m.17516	515	2	0	2	2	0	0	4	3	2	2	1	0	2	2	4	3	1	1	-0.263	-0.8415	0.697842	0.653774	0.151839
1439	lcl|c232587_g1_i15|m.17560	818	0	1	0	1	0	2	0	1	0	2	0	1	0	0	0	1	0	0	-0.004	-0.0097	0.926163	0.28222	0.825004
1440	lcl|c232597_g5_i12|m.17580	479	1	1	1	0	0	0	0	1	0	1	0	1	1	0	0	0	0	1	-0.15	-0.3564	1	0.55052	0.69924
1441	lcl|c232628_g4_i3|m.17621	443	0	0	0	1	1	0	1	2	0	0	0	0	0	1	1	1	0	0	-0.046	-0.1099	0.978543	0.374231	0.808268
1442	lcl|c232638_g9_i1|m.17634	158	1	3	5	7	3	6	6	5	4	5	3	6	5	8	8	5	5	5	0.114	0.5588	0.08377	0.008266	0.760485
1443	lcl|c232653_g3_i1|m.17643	347	2	4	6	3	6	3	5	4	5	4	4	5	4	4	5	2	2	2	-0.313	-1.4102	0.009503	0.632078	0.000784
1444	lcl|c232676_g1_i2|m.17666	263	1	2	1	7	2	3	3	7	2	5	0	3	0	0	0	1	1	3	0.674	2.191	0	0	0.626621
1445	lcl|c232684_g7_i2|m.17670	120	1	0	1	2	0	2	0	2	0	1	0	0	0	1	3	1	0	1	-0.051	-0.1384	0.985865	0.399247	0.801039
1446	lcl|c232684_g7_i4|m.17671	523	2	2	7	4	2	2	3	1	5	5	4	1	4	4	4	3	2	3	-0.355	-1.3485	0.018564	0.634534	0.001649
1447	lcl|c232696_g3_i2|m.17688	238	0	0	0	0	0	0	0	0	0	2	2	0	0	0	1	0	0	0	-0.111	-0.2804	1	0.506869	0.74552
1448	lcl|c232716_g1_i2|m.17708	496	9	11	15	21	13	20	15	20	9	16	8	29	13	18	11	14	11	14	0.349	2.6746	0	0	0.615166
1449	lcl|c232732_g1_i2|m.17723	145	0	0	0	1	0	0	0	0	0	0	0	0	0	0	0	0	0	0	-0.109	-0.2691	0.999742	0.499518	0.751307
1450	lcl|c232737_g3_i2|m.17725	566	0	0	0	0	1	1	1	4	0	0	0	0	0	0	2	3	0	1	0.133	0.3719	0.299039	0.038342	0.796083
1451	lcl|c232744_g5_i2|m.17733	585	3	12	4	9	8	13	10	12	4	11	14	5	11	19	13	17	17	28	0.311	2.2189	0	0	0.625918
1452	lcl|c232758_g3_i3|m.17747	492	0	0	2	2	0	2	1	2	1	1	0	2	1	0	1	0	1	1	0.085	0.2195	0.588717	0.102203	0.820445
1453	lcl|c232769_g4_i2|m.17751	967	0	2	1	2	1	2	1	3	1	1	2	0	1	1	0	0	0	0	0.138	0.3645	0.311425	0.04044	0.797451
1454	lcl|c232777_g1_i2|m.17758	171	1	1	0	0	1	0	0	0	0	1	0	0	1	0	0	0	0	0	-0.13	-0.3269	1	0.534761	0.718809
1455	lcl|c232783_g1_i1|m.17764	242	0	0	1	3	3	3	2	2	1	0	4	2	1	0	2	2	3	3	-0.085	-0.2774	1	0.504939	0.747082
1456	lcl|c232791_g2_i3|m.17780	1114	5	6	26	18	13	12	29	28	11	12	17	8	8	6	25	8	22	16	-0.411	-3.3818	0	0.607727	0
1457	lcl|c232804_g4_i5|m.17788	301	1	1	2	2	2	2	2	2	3	2	4	2	1	2	2	2	1	2	-0.151	-0.465	1	0.596582	0.607065
1458	lcl|c232813_g1_i6|m.17800	145	0	2	1	2	0	2	3	3	2	2	5	2	1	3	1	5	3	4	0.207	0.7039	0.02306	0.001955	0.735266
1459	lcl|c232813_g3_i2|m.17801	479	0	2	1	3	0	0	0	1	0	1	0	3	0	3	2	3	1	4	0.5	1.3906	2e-06	0	0.662937
1460	lcl|c232821_g1_i1|m.17807	713	0	1	0	0	0	1	1	0	0	0	0	0	0	0	0	1	0	0	-0.18	-0.4384	1	0.586926	0.63274
1461	lcl|c232834_g2_i9|m.17824	151	14	20	19	18	22	16	24	23	20	18	15	18	24	18	21	22	18	20	-0.118	-1.1143	0.157302	0.645461	0.019006
1462	lcl|c232842_g1_i1|m.17827	221	2	3	3	6	5	3	3	6	4	6	1	1	0	3	4	2	2	2	0.091	0.3556	0.326653	0.043082	0.799081
1463	lcl|c232843_g1_i4|m.17830	270	8	13	21	27	14	19	19	20	7	20	13	15	15	12	13	12	21	34	0.157	1.3724	3e-06	0	0.664226
1464	lcl|c232847_g2_i2|m.17831	205	2	4	3	4	4	3	2	2	2	3	2	3	2	2	3	2	3	4	0.051	0.1868	0.65247	0.122164	0.824056
1465	lcl|c232847_g6_i1|m.17834	305	1	2	2	1	1	3	1	2	1	2	1	0	2	1	1	1	3	4	0.095	0.2777	0.472647	0.072347	0.812333
1466	lcl|c232850_g3_i3|m.17837	316	0	1	0	0	1	0	2	1	1	0	0	0	0	0	2	0	0	1	-0.292	-0.7148	0.916763	0.647988	0.293468
1467	lcl|c232853_g2_i4|m.17839	478	0	0	1	1	2	1	0	0	1	0	1	0	0	0	0	1	1	0	-0.209	-0.563	1	0.62439	0.495321
1468	lcl|c232854_g3_i11|m.17840	291	0	0	0	0	0	0	0	0	0	0	0	0	0	2	0	0	0	0	0.004	0.0091	0.910341	0.264929	0.826732
1469	lcl|c232868_g2_i13|m.17849	171	0	0	0	0	0	0	0	0	0	0	0	0	0	0	1	0	1	2	-0.023	-0.0589	0.957922	0.327799	0.818413
1470	lcl|c232893_g3_i2|m.17884	184	0	1	1	1	2	1	0	0	1	0	1	0	0	1	1	2	0	0	-0.098	-0.2458	0.998422	0.483664	0.762411
1471	lcl|c232899_g1_i2|m.17887	378	1	1	2	1	0	4	1	1	0	1	2	2	1	1	1	1	0	1	0.009	0.0231	0.897108	0.252182	0.827746
1472	lcl|c232931_g1_i10|m.17922	718	0	1	0	2	1	5	1	4	0	3	1	0	0	0	0	3	0	0	0.561	1.603	0	0	0.649209
1473	lcl|c232943_g2_i1|m.17930	604	0	0	0	1	0	1	0	0	1	1	0	0	0	0	0	0	0	0	-0.114	-0.2767	1	0.504486	0.747444
1474	lcl|c232944_g1_i1|m.17933	542	0	0	0	0	0	1	0	2	0	0	0	0	0	0	0	0	0	0	-0.05	-0.1277	0.983404	0.389956	0.803889
1475	lcl|c232949_g3_i7|m.17939	154	1	4	4	7	2	9	6	9	4	8	6	6	5	9	6	10	6	7	0.452	2.2158	0	0	0.625996
1476	lcl|c232964_g4_i5|m.17974	410	1	2	1	1	0	2	0	1	1	1	1	0	0	1	0	0	1	2	0.075	0.1933	0.639974	0.118014	0.8234
1477	lcl|c232983_g2_i2|m.17991	490	0	0	2	4	2	4	4	4	0	3	0	2	3	2	0	2	2	3	0.224	0.7661	0.01234	0.000985	0.72566
1478	lcl|c232986_g1_i4|m.17993	2567	0	0	0	1	0	1	1	1	1	0	0	0	0	0	0	2	0	1	-0.081	-0.1974	0.994744	0.447806	0.782205
1479	lcl|c233001_g2_i4|m.18006	309	5	7	10	11	5	9	13	15	3	12	6	7	6	7	6	6	11	9	0.123	0.7694	0.011923	0.000948	0.725172
1480	lcl|c233011_g1_i2|m.18023	248	5	9	0	0	8	7	18	20	7	7	0	0	7	6	0	0	2	5	-0.015	-0.0769	0.966473	0.344364	0.815229
1481	lcl|c233012_g3_i3|m.18031	551	6	8	8	6	4	11	10	20	5	14	12	23	6	13	10	13	3	10	0.526	3.4836	0	0	0.606814
1482	lcl|c233024_g1_i6|m.18051	1029	4	11	11	14	12	12	9	9	12	8	11	7	13	12	13	14	9	7	-0.111	-0.7657	0.844827	0.651544	0.230845
1483	lcl|c233026_g1_i2|m.18055	412	0	2	1	4	3	10	4	6	4	3	6	4	4	2	4	3	4	7	0.158	0.7298	0.017864	0.001477	0.731173
1484	lcl|c233030_g2_i3|m.18059	1298	3	6	6	9	3	11	9	5	2	6	4	9	3	8	8	7	6	5	0.278	1.501	0	0	0.65549
1485	lcl|c233033_g3_i4|m.18064	370	0	0	3	4	1	2	2	3	0	0	0	0	0	0	0	1	3	1	-0.041	-0.1221	0.982032	0.385043	0.805315
1486	lcl|c233042_g5_i1|m.18070	272	2	4	2	1	2	1	3	2	1	4	1	1	2	2	1	3	5	3	-0.045	-0.1456	0.987403	0.405424	0.799027
1487	lcl|c233048_g1_i8|m.18077	496	1	1	3	2	1	2	3	4	2	1	2	3	2	3	3	3	2	1	-0.029	-0.0977	0.974562	0.363284	0.811014
1488	lcl|c233061_g7_i1|m.18094	111	0	0	0	0	1	2	2	9	0	1	0	0	0	0	0	0	0	0	0.36	1.0349	0.00051	3.2e-05	0.692501
1489	lcl|c233068_g2_i1|m.18098	672	2	5	6	3	4	3	3	2	3	2	3	1	7	3	0	0	6	4	-0.478	-1.8724	1.7e-05	0.619785	1e-06
1490	lcl|c233068_g2_i3|m.18101	639	3	6	5	3	4	3	3	2	3	2	3	1	7	3	0	0	6	4	-0.428	-1.7584	0.000102	0.62201	5e-06
1491	lcl|c233068_g3_i2|m.18104	479	4	3	10	9	0	0	2	2	6	5	3	3	5	2	1	0	2	3	-0.272	-1.1456	0.12309	0.643922	0.014191
1492	lcl|c233092_g2_i1|m.18134	203	0	0	0	0	0	0	0	0	0	0	0	1	0	0	1	0	0	0	-0.135	-0.3235	1	0.532849	0.720928
1493	lcl|c233095_g1_i10|m.18140	372	0	0	0	1	0	3	0	2	0	1	0	0	0	0	0	0	0	1	0.119	0.2982	0.432477	0.063513	0.809061
1494	lcl|c233103_g2_i1|m.18143	198	0	0	0	0	0	1	1	1	1	0	1	2	1	0	1	1	0	0	-0.049	-0.1253	0.982851	0.387855	0.804506
1495	lcl|c233130_g1_i1|m.18171	548	0	0	2	2	2	1	1	4	0	0	2	0	3	1	1	2	3	5	-0.016	-0.0488	0.95246	0.318454	0.820016
1496	lcl|c233138_g2_i2|m.18184	151	0	0	0	0	0	0	0	0	0	0	0	0	0	0	0	0	0	0	-0.13	-0.3181	1	0.529772	0.724239
1497	lcl|c233142_g2_i1|m.18198	785	0	0	0	1	0	1	2	1	1	0	0	0	0	1	0	1	2	1	-0.285	-0.7129	0.919031	0.647818	0.295918
1498	lcl|c233143_g2_i13|m.18204	852	3	2	3	2	2	4	1	0	4	3	0	0	2	3	0	1	0	3	-0.051	-0.1677	0.991126	0.423969	0.792365
1499	lcl|c233156_g1_i1|m.18213	558	13	20	13	16	19	16	21	16	17	19	17	21	21	28	24	26	25	27	0.005	0.0428	0.876355	0.234505	0.828785
1500	lcl|c233163_g6_i1|m.18223	1116	1	0	0	1	0	0	0	0	0	0	0	1	0	1	0	0	0	0	-0.165	-0.4178	1	0.578753	0.651214
1501	lcl|c233166_g6_i1|m.18229	1069	0	0	0	0	0	0	0	0	0	0	0	0	1	0	0	0	1	0	-0.148	-0.3534	1	0.548984	0.701329
1502	lcl|c233181_g4_i3|m.18256	279	1	1	4	3	2	4	3	2	3	3	4	2	1	1	2	1	5	2	-0.336	-1.1554	0.11368	0.643439	0.012923
1503	lcl|c233197_g2_i1|m.18267	188	0	0	0	1	0	0	0	0	0	0	0	0	0	0	1	1	0	0	-0.124	-0.2977	1	0.517688	0.736142
1504	lcl|c233212_g2_i5|m.18273	310	0	0	0	0	0	0	1	0	0	0	0	0	0	0	0	1	0	0	-0.166	-0.3994	1	0.570915	0.666691
1505	lcl|c233212_g2_i6|m.18275	344	0	0	1	0	0	1	1	1	1	1	0	0	0	2	0	0	0	0	-0.055	-0.1355	0.985281	0.396742	0.801828
1506	lcl|c233215_g1_i5|m.18281	355	1	2	1	2	1	1	1	2	1	1	1	1	0	1	1	1	1	0	0.142	0.3597	0.319575	0.041848	0.798332
1507	lcl|c233217_g3_i1|m.18285	585	0	0	2	2	0	1	1	1	1	1	1	0	0	1	0	1	1	1	-0.114	-0.2872	1	0.511185	0.74191
1508	lcl|c233235_g3_i2|m.18302	393	0	0	0	1	1	0	0	0	0	0	1	0	0	0	0	0	0	1	-0.104	-0.2491	0.998666	0.485966	0.760904
1509	lcl|c233247_g1_i1|m.18311	591	21	39	37	44	44	46	33	33	35	32	32	46	35	54	45	37	35	43	0.068	0.8703	0.003946	0.000285	0.711272
1510	lcl|c233257_g5_i1|m.18320	206	2	3	2	3	2	4	2	3	4	3	2	3	3	2	3	2	2	2	0.051	0.1725	0.679362	0.131607	0.825382
1511	lcl|c233260_g1_i1|m.18321	133	1	1	8	6	4	4	5	5	1	1	1	5	1	1	3	4	3	6	0.103	0.4203	0.225066	0.026686	0.786931
1512	lcl|c233287_g2_i1|m.18368	844	14	20	19	33	29	35	19	32	18	30	18	19	20	27	22	24	20	37	0.249	2.5715	0	0	0.617366
1513	lcl|c233306_g1_i2|m.18390	556	45	61	64	76	70	73	68	66	60	57	70	69	53	74	61	61	74	68	-0.034	-0.5565	1	0.622886	0.503494
1514	lcl|c233334_g2_i12|m.18425	420	1	1	3	3	1	3	0	2	0	3	4	3	1	1	0	2	2	1	0.067	0.2132	0.60116	0.10587	0.8212
1515	lcl|c233334_g2_i17|m.18426	356	1	2	4	3	1	3	0	3	0	3	4	3	1	1	0	1	2	1	0.095	0.309	0.411706	0.059197	0.807267
1516	lcl|c233339_g2_i12|m.18429	982	1	0	1	1	1	1	0	1	0	1	1	0	1	1	2	3	1	1	-0.043	-0.1124	0.979323	0.376459	0.80768
1517	lcl|c233342_g3_i1|m.18435	155	0	0	0	0	0	1	0	0	1	0	0	1	0	0	0	0	0	0	-0.111	-0.2645	0.999483	0.496462	0.753585
1518	lcl|c233342_g3_i6|m.18439	180	0	0	0	1	0	0	0	0	1	0	0	2	0	0	0	0	0	0	-0.036	-0.0906	0.972009	0.356858	0.812519
1519	lcl|c233342_g3_i9|m.18441	220	0	0	0	0	0	0	0	0	1	0	0	3	0	0	0	0	0	0	0.053	0.1346	0.746702	0.158656	0.828066
1520	lcl|c233348_g2_i1|m.18445	155	0	0	0	0	0	0	0	0	0	0	0	0	0	0	0	0	0	0	-0.113	-0.2705	0.999838	0.500441	0.750604
1521	lcl|c233370_g1_i2|m.18468	311	2	8	5	4	5	3	6	2	4	4	3	4	3	3	7	6	6	5	-0.128	-0.5876	0.99998	0.629698	0.463602
1522	lcl|c233377_g4_i3|m.18471	178	1	3	1	2	2	2	2	3	3	2	1	0	1	1	2	1	3	2	-0.072	-0.2228	0.997016	0.467107	0.772344
1523	lcl|c233384_g5_i1|m.18475	423	4	2	0	0	2	0	1	2	1	3	2	0	4	1	3	2	4	0	-0.49	-1.5119	0.002888	0.6285	0.00021
1524	lcl|c233384_g5_i6|m.18482	422	1	0	0	0	0	0	1	0	0	0	2	0	0	0	0	0	0	0	-0.219	-0.5461	1	0.620386	0.516369
1525	lcl|c233414_g6_i1|m.18518	131	0	0	1	1	0	1	0	3	0	1	0	0	0	0	0	0	0	0	0.051	0.1386	0.739957	0.155668	0.827843
1526	lcl|c233425_g3_i4|m.18529	173	0	0	2	0	0	4	2	1	2	0	1	3	1	2	5	3	1	2	0.019	0.0633	0.852048	0.216528	0.829398
1527	lcl|c233431_g1_i6|m.18546	197	0	0	0	0	1	0	0	1	0	1	0	1	1	0	1	1	1	0	-0.149	-0.3491	1	0.546757	0.704285
1528	lcl|c233449_g1_i1|m.18576	395	3	1	3	2	2	2	1	2	2	4	2	5	2	2	1	0	1	1	0.023	0.0743	0.837866	0.207093	0.829537
1529	lcl|c233474_g3_i1|m.18592	403	0	0	0	1	0	0	1	0	0	0	0	0	0	0	0	0	0	0	-0.14	-0.3391	1	0.541457	0.710977
1530	lcl|c233493_g6_i1|m.18612	113	0	1	0	0	0	0	0	0	0	0	0	0	0	0	0	0	0	0	-0.115	-0.2803	1	0.506805	0.745573
1531	lcl|c233495_g1_i1|m.18614	257	2	3	2	2	0	0	0	0	6	8	0	0	8	5	0	0	0	0	-0.146	-0.525	1	0.61495	0.541681
1532	lcl|c233502_g5_i1|m.18630	660	0	0	0	0	0	0	0	0	0	0	0	0	0	0	0	0	1	0	-0.121	-0.2868	1	0.510933	0.742124
1533	lcl|c233511_g2_i2|m.18658	206	0	0	0	0	1	1	0	0	0	0	0	0	0	0	0	0	0	0	-0.117	-0.2979	1	0.51781	0.73603
1534	lcl|c233547_g3_i1|m.18698	103	0	0	0	0	0	2	1	0	0	0	0	1	2	2	1	1	1	1	-0.025	-0.0642	0.96062	0.33269	0.81752
1535	lcl|c233547_g4_i3|m.18699	305	3	5	5	10	7	10	4	9	5	9	7	5	7	10	9	12	10	12	0.252	1.5273	0	0	0.653812
1536	lcl|c233552_g1_i1|m.18704	538	1	4	5	4	0	1	1	2	4	2	1	0	3	1	1	0	1	1	-0.164	-0.5442	1	0.619917	0.518694
1537	lcl|c233557_g1_i1|m.18714	490	1	2	4	3	1	3	1	4	2	1	1	2	2	1	2	1	2	2	0.028	0.0881	0.818999	0.195491	0.829527
1538	lcl|c233581_g5_i1|m.18734	105	1	1	0	0	0	2	1	2	0	2	0	1	0	0	1	1	1	0	0.072	0.1894	0.647483	0.120493	0.823798
1539	lcl|c233582_g4_i5|m.18735	330	0	0	1	0	0	1	0	0	0	0	0	1	0	0	1	1	0	0	-0.131	-0.3205	1	0.531146	0.722776
1540	lcl|c233583_g1_i1|m.18736	292	4	4	2	2	4	4	6	9	6	6	2	2	4	7	5	4	6	4	-0.052	-0.2406	0.998194	0.479999	0.764744
1541	lcl|c233583_g1_i3|m.18737	289	7	10	3	4	9	12	16	18	16	11	3	4	9	13	13	12	14	13	-0.05	-0.3383	1	0.541026	0.711501
1542	lcl|c233588_g6_i3|m.18739	184	3	4	3	2	2	3	3	3	4	4	2	1	3	5	3	4	2	3	0.059	0.2194	0.588917	0.102261	0.820457
1543	lcl|c233596_g1_i1|m.18749	391	2	1	3	4	1	3	6	2	5	3	4	1	4	4	5	3	4	3	-0.416	-1.691	0.000273	0.623518	1.6e-05
1544	lcl|c233606_g5_i2|m.18764	491	0	0	0	0	0	0	0	1	0	0	0	0	0	0	0	0	0	0	-0.154	-0.391	1	0.567164	0.673442
1545	lcl|c233609_g4_i2|m.18776	787	0	0	0	0	0	0	0	1	0	0	0	0	0	0	0	0	0	0	-0.169	-0.3837	1	0.563813	0.679151
1546	lcl|c233626_g4_i1|m.18797	418	0	0	0	0	0	0	0	0	0	0	0	0	0	1	0	0	0	0	-0.123	-0.2957	1	0.516464	0.737258
1547	lcl|c233647_g1_i1|m.18818	1166	1	2	1	1	2	1	1	1	1	1	0	0	1	1	2	1	1	1	-0.178	-0.4858	1	0.603464	0.585554
1548	lcl|c233650_g1_i7|m.18822	194	2	2	2	1	2	1	1	3	0	3	1	1	0	5	1	1	0	0	0.214	0.5981	0.060525	0.005716	0.753304
1549	lcl|c233661_g2_i3|m.18841	210	0	1	0	0	18	16	24	30	0	4	2	2	0	4	21	14	17	23	-0.004	-0.0302	0.941013	0.301205	0.822627
1550	lcl|c233679_g3_i13|m.18855	228	1	2	3	3	1	3	2	1	2	2	3	5	2	2	5	2	5	1	-0.169	-0.578	0.99999	0.627698	0.47612
1551	lcl|c233739_g1_i1|m.18926	229	1	1	3	1	1	1	1	0	2	1	1	1	0	0	0	1	1	2	-0.281	-0.7424	0.880717	0.650147	0.258723
1552	lcl|c233739_g3_i1|m.18931	617	16	10	25	13	20	17	6	4	19	15	13	6	16	9	16	7	14	20	-0.467	-3.6203	0	0.60691	0
1553	lcl|c233765_g2_i1|m.18981	846	0	0	1	0	0	0	0	1	0	1	0	2	0	0	0	0	0	0	-0.095	-0.2428	0.998327	0.481556	0.763764
1554	lcl|c233766_g4_i1|m.18988	173	51	37	63	43	19	13	37	11	37	51	42	21	52	55	92	65	91	66	-0.386	-5.4768	0	0.602927	0
1555	lcl|c233767_g1_i3|m.18989	165	40	36	50	48	41	46	62	58	45	42	63	56	54	56	47	38	46	52	-0.142	-2.1279	0	0.615666	0
1556	lcl|c233774_g10_i1|m.19002	229	0	0	0	0	1	1	0	0	0	0	0	0	0	0	0	1	0	0	-0.119	-0.2966	1	0.517016	0.736757
1557	lcl|c233784_g1_i2|m.19012	502	0	0	0	0	0	0	0	0	0	0	0	0	2	0	0	0	0	0	-0.21	-0.5522	1	0.621866	0.508848
1558	lcl|c233811_g4_i2|m.19026	746	1	2	1	2	1	1	1	0	1	1	0	0	0	3	1	1	1	1	0.132	0.3387	0.356516	0.048471	0.802123
1559	lcl|c233817_g1_i1|m.19030	365	0	1	0	0	0	0	0	1	0	0	0	1	0	0	0	0	0	0	-0.155	-0.3614	1	0.553046	0.695707
1560	lcl|c233818_g2_i6|m.19032	101	4	3	10	15	14	24	10	24	2	11	8	8	7	15	13	9	14	21	0.362	2.54	0	0	0.618086
1561	lcl|c233837_g1_i4|m.19057	508	0	0	2	0	0	1	0	0	0	0	0	0	0	0	0	0	0	0	-0.192	-0.4698	1	0.598221	0.602212
1562	lcl|c233840_g3_i1|m.19060	338	0	1	1	1	2	1	1	1	2	1	1	1	1	1	2	1	1	1	-0.363	-0.9311	0.491372	0.652936	0.084408
1563	lcl|c233847_g4_i2|m.19066	221	0	0	1	0	1	0	0	0	1	0	0	0	0	0	0	0	0	1	-0.088	-0.2092	0.995904	0.456902	0.777763
1564	lcl|c233848_g8_i1|m.19070	239	0	0	0	1	0	1	2	2	0	1	1	0	0	0	1	0	0	1	-0.137	-0.3727	1	0.558603	0.687482
1565	lcl|c233868_g3_i1|m.19115	328	0	0	0	0	0	0	0	1	0	0	0	0	0	0	1	0	0	0	-0.137	-0.3568	1	0.550723	0.69896
1566	lcl|c233873_g4_i1|m.19119	583	2	2	4	5	7	8	4	9	1	7	4	11	1	5	8	4	9	10	0.324	1.656	0	0	0.646211
1567	lcl|c233905_g2_i1|m.19151	172	7	8	7	9	21	17	14	8	12	14	17	13	18	20	15	15	22	21	-0.149	-1.1591	0.110276	0.643257	0.01247
1568	lcl|c233922_g1_i2|m.19174	1172	4	2	4	5	4	5	3	2	2	4	2	2	3	4	5	2	3	2	-0.162	-0.6318	0.986073	0.637751	0.404412
1569	lcl|c233934_g1_i3|m.19215	527	0	0	0	0	0	0	0	0	0	0	0	2	0	1	0	0	0	1	-0.004	-0.0105	0.926789	0.282959	0.82492
1570	lcl|c233948_g1_i2|m.19238	365	7	12	10	11	12	15	15	26	6	17	12	22	10	19	11	15	10	21	0.442	3.8793	0	0	0.605034
1571	lcl|c233953_g2_i3|m.19243	141	0	0	1	0	0	0	1	0	0	0	0	0	0	0	0	0	0	0	-0.102	-0.2428	0.998327	0.481556	0.763764
1572	lcl|c233954_g6_i2|m.19250	270	1	1	1	0	3	2	1	2	2	2	3	3	3	3	4	4	3	2	-0.118	-0.4185	1	0.579041	0.650606
1573	lcl|c233968_g2_i12|m.19271	200	4	2	3	2	3	3	0	0	3	3	4	6	4	5	0	0	2	0	-0.118	-0.4468	1	0.590082	0.624855
1574	lcl|c233968_g6_i1|m.19272	118	3	2	0	0	6	3	1	2	3	3	1	1	2	5	0	0	4	3	-0.133	-0.4581	1	0.594171	0.613923
1575	lcl|c234004_g4_i3|m.19315	477	2	4	2	2	0	2	3	4	3	3	1	2	1	1	1	0	1	2	0.138	0.439	0.199913	0.023048	0.783336
1576	lcl|c234041_g5_i1|m.19364	124	8	5	6	6	7	6	6	10	5	7	6	5	2	8	7	6	6	6	0.006	0.0299	0.890249	0.246042	0.828155
1577	lcl|c234054_g3_i2|m.19385	336	67	69	74	97	81	96	71	98	83	112	100	56	83	106	101	118	99	102	0.02	0.395	0.262195	0.032351	0.791753
1578	lcl|c234060_g2_i2|m.19387	328	2	4	6	4	2	3	3	2	4	4	4	7	5	5	5	4	4	5	-0.001	-0.0043	0.921837	0.277238	0.825544
1579	lcl|c234075_g1_i1|m.19400	239	1	0	5	7	6	7	3	4	1	5	5	6	2	6	6	6	4	3	0.2	0.8897	0.00315	0.000223	0.70882
1580	lcl|c234077_g1_i1|m.19404	690	0	0	4	5	1	9	0	14	0	1	0	7	0	0	0	2	0	1	0.969	3.3251	0	0	0.60774
1581	lcl|c234080_g1_i1|m.19410	449	1	3	2	6	3	7	6	8	2	5	1	5	2	3	1	1	4	6	0.532	2.2601	0	0	0.624889
1582	lcl|c234080_g1_i8|m.19412	160	0	0	0	1	0	1	0	0	0	0	0	1	0	1	0	0	0	2	-0.049	-0.1226	0.982166	0.385483	0.80519
1583	lcl|c234082_g2_i6|m.19416	452	0	0	0	2	0	1	0	1	1	1	0	1	0	1	0	0	0	1	-0.025	-0.0633	0.960176	0.33186	0.817674
1584	lcl|c234108_g1_i2|m.19454	303	1	1	4	2	2	3	6	5	1	2	1	4	0	2	0	2	1	1	0.095	0.3221	0.386982	0.054263	0.805034
1585	lcl|c234114_g3_i3|m.19475	628	1	0	2	1	0	0	1	0	0	2	0	0	0	2	1	2	0	0	0.006	0.0155	0.904442	0.259086	0.827224
1586	lcl|c234120_g6_i1|m.19489	165	8	6	11	10	9	13	10	12	4	8	3	5	2	5	4	7	6	6	0.108	0.6312	0.045375	0.004138	0.747444
1587	lcl|c234134_g6_i1|m.19522	261	0	0	0	0	1	0	1	1	0	0	0	0	0	0	0	0	0	0	-0.085	-0.2044	0.995499	0.453229	0.779599
1588	lcl|c234135_g3_i2|m.19525	483	1	0	0	0	0	0	0	0	0	0	0	0	0	0	0	0	0	0	-0.136	-0.3211	1	0.531488	0.722408
1589	lcl|c234140_g5_i2|m.19531	617	2	4	1	7	1	4	2	4	1	8	1	3	2	2	1	0	2	3	0.76	2.581	0	0	0.617153
1590	lcl|c234163_g1_i1|m.19560	428	0	0	0	0	0	0	0	1	0	0	0	0	1	0	0	3	1	1	0.061	0.1453	0.728375	0.150731	0.827437
1591	lcl|c234177_g2_i1|m.19581	206	1	1	1	0	0	0	1	2	1	1	1	1	1	1	3	3	0	1	-0.002	-0.0062	0.923378	0.27899	0.825358
1592	lcl|c234209_g3_i1|m.19613	100	0	0	0	0	1	0	1	0	1	0	0	0	0	0	0	0	1	0	-0.087	-0.2127	0.996237	0.459557	0.7764
1593	lcl|c234222_g6_i3|m.19630	584	1	1	2	1	1	1	1	1	1	1	2	1	0	0	1	1	0	1	-0.269	-0.6956	0.937818	0.646141	0.318511
1594	lcl|c234228_g5_i1|m.19637	305	0	0	0	0	0	0	0	0	0	0	0	0	0	0	0	0	0	0	-0.116	-0.2926	1	0.514554	0.738973
1595	lcl|c234277_g5_i1|m.19677	435	6	4	1	0	10	10	6	6	8	7	2	2	1	5	3	1	2	0	-0.174	-0.805	0.773809	0.653107	0.187476
1596	lcl|c234322_g7_i1|m.19718	538	0	1	0	1	1	1	2	1	1	3	1	1	1	1	1	0	0	2	0.024	0.0639	0.851294	0.21601	0.829409
1597	lcl|c234352_g2_i1|m.19757	349	1	1	1	1	0	1	0	1	0	1	2	2	0	0	0	3	2	1	-0.03	-0.0846	0.969697	0.351401	0.813737
1598	lcl|c234380_g5_i3|m.19780	403	0	0	0	0	0	1	0	0	0	0	0	3	0	3	0	1	0	0	0.163	0.4299	0.211909	0.024763	0.785087
1599	lcl|c234390_g2_i1|m.19785	399	0	1	0	0	0	0	0	0	0	0	0	0	0	0	0	0	0	1	-0.152	-0.3702	1	0.557392	0.689331
1600	lcl|c234391_g1_i4|m.19790	185	0	1	1	1	1	2	0	0	1	1	0	0	0	0	0	0	0	0	-0.049	-0.1223	0.982086	0.385219	0.805265
1601	lcl|c234420_g1_i5|m.19816	618	0	1	0	1	0	0	0	1	0	1	0	1	0	0	0	1	0	0	-0.129	-0.3123	1	0.52641	0.727719
1602	lcl|c234421_g4_i7|m.19822	540	5	6	3	6	6	11	4	11	9	6	8	11	13	23	19	8	11	13	0.113	0.7539	0.013996	0.00113	0.727484
1603	lcl|c234432_g4_i2|m.19837	253	0	0	0	0	0	2	0	0	0	0	0	0	0	0	0	0	0	2	0.035	0.0884	0.81858	0.195242	0.829524
1604	lcl|c234439_g3_i1|m.19847	659	0	0	0	0	0	0	0	0	0	1	0	1	0	0	0	1	0	0	-0.106	-0.2656	0.999497	0.497196	0.753044
1605	lcl|c234442_g1_i3|m.19849	596	0	1	4	4	1	2	1	2	2	2	2	0	1	0	1	0	1	3	0.062	0.188	0.650184	0.121391	0.823937
1606	lcl|c234446_g3_i2|m.19850	138	4	4	7	5	8	6	3	3	5	3	9	1	7	3	8	6	7	3	-0.587	-2.8074	0	0.609225	0
1607	lcl|c234480_g1_i1|m.19869	1123	0	2	1	1	0	0	1	0	2	0	0	0	0	0	2	0	0	0	-0.235	-0.6045	0.997898	0.633005	0.441199
1608	lcl|c234487_g2_i3|m.19886	498	0	0	0	0	0	0	0	0	0	0	0	0	0	0	0	0	0	0	-0.148	-0.3719	1	0.558216	0.688076
1609	lcl|c234511_g2_i1|m.19914	150	1	2	1	1	2	1	2	2	2	1	2	1	2	1	2	2	2	2	-0.272	-0.7416	0.881893	0.650092	0.259706
1610	lcl|c234533_g4_i3|m.19947	238	32	39	50	54	41	46	38	56	36	60	53	38	44	49	47	44	40	49	0.026	0.3439	0.347201	0.04676	0.801195
1611	lcl|c234544_g3_i6|m.19962	411	6	6	10	12	11	19	10	14	5	12	8	4	6	13	6	8	11	12	0.2	1.3381	5e-06	0	0.666703
1612	lcl|c234579_g2_i6|m.20008	462	2	3	5	8	5	4	5	6	5	4	5	3	7	7	10	8	7	8	-0.105	-0.5304	1	0.616388	0.535311
1613	lcl|c234617_g3_i1|m.20034	395	0	0	1	0	0	0	0	0	0	0	0	0	0	0	0	0	2	1	-0.195	-0.4999	1	0.607812	0.570265
1614	lcl|c234620_g1_i3|m.20041	1301	1	1	0	0	0	2	0	1	0	0	1	2	1	1	0	1	0	0	0.019	0.0472	0.871379	0.230607	0.828956
1615	lcl|c234626_g4_i3|m.20042	463	32	29	31	44	37	53	45	73	26	60	32	55	27	50	43	40	28	47	0.311	4.1231	0	0	0.604237
1616	lcl|c234626_g5_i4|m.20044	154	0	0	0	0	0	0	0	0	0	0	0	1	0	0	2	0	0	0	-0.145	-0.3664	1	0.55553	0.692109
1617	lcl|c234643_g1_i12|m.20068	232	10	8	6	9	14	16	10	15	11	11	8	1	12	14	16	15	14	21	-0.026	-0.1888	0.993889	0.44104	0.785294
1618	lcl|c234643_g1_i2|m.20073	218	11	11	9	8	10	10	14	8	10	11	11	5	18	15	16	23	21	19	-0.19	-1.4256	0.007989	0.631499	0.000647
1619	lcl|c234643_g1_i6|m.20078	228	3	3	4	5	3	6	4	4	3	4	3	2	3	7	4	6	7	10	0.204	0.9506	0.001512	0.000101	0.701559
1620	lcl|c234643_g1_i7|m.20081	227	4	8	10	10	7	10	13	6	6	8	5	5	10	11	7	14	11	14	0.044	0.293	0.442575	0.065674	0.809908
1621	lcl|c234655_g3_i2|m.20090	332	1	0	0	1	1	1	2	2	1	2	0	3	1	1	3	1	2	2	-0.024	-0.0646	0.960816	0.333059	0.817451
1622	lcl|c234657_g3_i4|m.20097	120	1	1	1	1	1	1	1	1	1	2	2	0	1	3	1	1	2	3	0.138	0.3988	0.256384	0.031442	0.791033
1623	lcl|c234687_g2_i2|m.20139	137	0	1	1	0	0	0	1	0	1	1	1	3	0	2	0	0	0	0	0.134	0.3444	0.346314	0.046598	0.801105
1624	lcl|c234687_g3_i2|m.20140	139	0	0	0	0	0	1	0	0	0	0	0	0	1	0	1	0	0	0	-0.094	-0.2279	0.9973	0.470855	0.770226
1625	lcl|c234705_g1_i1|m.20159	349	0	0	0	0	0	1	0	1	0	0	1	1	0	0	0	1	0	0	-0.132	-0.3484	1	0.546392	0.704761
1626	lcl|c234712_g2_i1|m.20167	759	2	1	1	1	2	3	0	2	1	0	2	1	1	3	1	1	1	2	0.035	0.1015	0.799469	0.184502	0.829327
1627	lcl|c234733_g4_i1|m.20188	177	0	1	2	2	3	2	3	2	0	2	2	1	2	2	0	0	0	0	-0.229	-0.7077	0.924958	0.647339	0.302657
1628	lcl|c234733_g4_i3|m.20189	178	0	0	0	1	1	1	0	0	0	0	1	0	1	0	0	0	0	0	-0.135	-0.3418	1	0.542905	0.709194
1629	lcl|c234738_g1_i1|m.20193	257	3	3	3	3	3	3	3	3	3	3	3	3	3	3	3	2	3	3	-0.131	-0.5072	1	0.609966	0.56213
1630	lcl|c234738_g1_i3|m.20194	257	10	10	10	9	11	11	18	19	20	14	16	11	18	10	11	7	12	13	-0.29	-2.2635	0	0.613821	0
1631	lcl|c234780_g1_i5|m.20239	220	0	0	0	0	0	0	0	0	0	0	0	0	0	0	0	0	0	0	-0.12	-0.2944	1	0.515665	0.73798
1632	lcl|c234783_g2_i5|m.20249	165	7	0	3	2	6	4	13	7	2	7	19	8	7	7	15	8	9	10	-0.448	-2.4955	0	0.61129	0
1633	lcl|c234788_g2_i3|m.20258	307	1	4	3	6	4	7	7	10	3	7	6	5	6	9	7	7	4	7	0.282	1.3792	2e-06	0	0.663742
1634	lcl|c234789_g3_i1|m.20259	783	2	6	12	10	5	5	11	13	6	10	6	5	3	11	9	18	6	13	0.317	1.8823	0	0	0.635807
1635	lcl|c234838_g1_i12|m.20324	840	0	0	0	0	1	1	0	0	0	0	0	0	0	0	0	0	0	0	-0.144	-0.3421	1	0.543065	0.708995
1636	lcl|c234848_g2_i2|m.20335	208	0	0	0	0	0	1	0	2	0	0	0	0	0	1	0	0	0	0	-0.019	-0.0486	0.952348	0.318269	0.820046
1637	lcl|c234851_g1_i2|m.20336	428	2	5	3	3	3	6	5	6	2	4	1	3	1	1	2	4	3	5	0.347	1.3293	6e-06	0	0.667349
1638	lcl|c234864_g8_i3|m.20357	101	1	3	0	0	0	0	0	0	0	1	0	0	0	0	0	0	2	2	0.031	0.0836	0.825264	0.199244	0.829552
1639	lcl|c234867_g1_i1|m.20362	1625	0	2	2	1	1	0	1	0	2	0	1	0	1	0	0	0	0	1	-0.208	-0.5378	1	0.618307	0.52646
1640	lcl|c234869_g3_i5|m.20367	753	4	2	5	5	3	5	2	6	1	6	3	2	2	3	2	5	2	2	0.244	1.004	0.000767	4.9e-05	0.695697
1641	lcl|c234874_g6_i2|m.20370	742	0	0	0	0	0	0	0	0	0	0	1	0	0	0	1	1	0	1	-0.112	-0.2845	1	0.509481	0.743354
1642	lcl|c234877_g1_i1|m.20373	799	0	1	0	1	0	0	0	0	0	0	0	1	0	0	0	1	0	0	-0.13	-0.3266	1	0.534593	0.718997
1643	lcl|c234891_g1_i3|m.20389	296	1	3	3	4	4	5	2	6	1	5	1	2	3	4	3	1	3	3	0.287	1.033	0.000523	3.2e-05	0.692694
1644	lcl|c234898_g1_i3|m.20394	504	2	3	4	6	6	4	4	3	2	4	2	1	1	2	0	3	2	3	0.029	0.1112	0.784665	0.176728	0.829068
1645	lcl|c234903_g3_i2|m.20397	465	0	1	0	0	0	0	0	0	1	0	0	0	0	0	0	0	0	0	-0.1	-0.2554	0.998972	0.49031	0.757967
1646	lcl|c234912_g2_i1|m.20410	478	0	0	3	3	0	0	0	0	0	0	0	0	0	0	0	1	0	1	-0.157	-0.425	1	0.58168	0.644895
1647	lcl|c234922_g3_i6|m.20423	469	0	0	0	0	0	0	0	1	0	0	0	0	0	0	0	0	0	0	-0.144	-0.3382	1	0.540972	0.711567
1648	lcl|c234934_g3_i3|m.20432	882	68	97	94	97	90	110	90	90	87	92	86	64	88	88	83	82	84	96	-0.052	-1.0499	0.249333	0.648528	0.033509
1649	lcl|c234955_g3_i3|m.20445	340	23	11	34	11	16	10	23	16	27	23	27	10	26	17	30	5	22	13	-0.762	-6.8021	0	0.601387	0
1650	lcl|c235036_g1_i1|m.20514	319	9	15	19	20	12	19	19	20	10	21	12	2	17	15	11	20	17	23	0.089	0.7599	0.013158	0.001056	0.726583
1651	lcl|c235052_g1_i4|m.20524	324	1	1	0	1	0	1	1	2	0	1	0	0	1	1	1	1	1	1	-0.049	-0.1188	0.981089	0.382133	0.806135
1652	lcl|c235079_g5_i3|m.20543	326	1	0	0	0	0	2	1	0	0	0	1	0	2	1	1	0	0	2	-0.067	-0.1717	0.991797	0.427255	0.791079
1653	lcl|c235089_g1_i3|m.20552	1227	7	8	8	12	6	13	11	16	3	10	6	7	5	10	7	9	7	12	0.375	2.2275	0	0	0.625702
1654	lcl|c235095_g3_i4|m.20556	353	0	0	0	1	2	1	0	3	0	1	0	4	0	1	3	0	0	0	0.034	0.0972	0.805865	0.187997	0.829411
1655	lcl|c235107_g1_i3|m.20571	507	0	0	0	0	0	0	0	0	0	0	0	0	0	0	0	0	0	0	-0.139	-0.3485	1	0.546444	0.704693
1656	lcl|c235115_g6_i1|m.20588	219	4	1	3	2	2	4	2	5	1	3	1	4	1	3	2	3	0	1	0.267	0.9599	0.001347	8.9e-05	0.700506
1657	lcl|c235126_g4_i1|m.20601	207	6	27	24	30	12	18	16	12	15	20	24	14	12	9	1	0	11	11	0.044	0.3666	0.307882	0.039835	0.797064
1658	lcl|c235170_g2_i4|m.20659	151	0	0	0	1	0	0	0	0	0	0	0	1	0	0	0	0	0	0	-0.1	-0.2402	0.998164	0.479715	0.764921
1659	lcl|c235184_g7_i1|m.20675	237	1	2	5	7	9	13	6	8	3	8	7	7	6	6	8	7	10	9	0.092	0.5349	0.101133	0.010264	0.764955
1660	lcl|c235213_g4_i11|m.20710	332	1	2	6	6	1	1	2	1	1	2	4	4	3	1	1	1	5	4	-0.164	-0.6037	0.998195	0.632854	0.442268
1661	lcl|c235237_g2_i1|m.20732	158	0	1	0	0	0	1	0	0	0	0	1	1	1	0	0	0	0	0	-0.126	-0.3168	1	0.529023	0.725025
[truncated: 700 more rows]

## Sheet: Qspec IC NB vs B
Non-bleached = -LFC			Bleached = +LFC			NB = Non-bleached		B = Bleached
[truncated: 1,990 more rows]

[truncated: 1 more sheets: Sigprots + Categories]
